# Supplementary material for: De Novo Transcriptome Analysis Reveals Flowering-Related Genes That Potentially Contribute to Flowering-Time Control in the Japanese Cultivated Gentian Gentiana triflora
Source: Int J Mol Sci. 2022 Oct 4;23(19):11754. doi: 10.3390/ijms231911754 (PMC9570441; doi:10.3390/ijms231911754)
Supplement: Supplementary file 1 [file ijms-23-11754-s001.zip › Supplementary_TablesR3.xlsx]

## Sheet: Supplementary Table 1
Supplementary Table 1. Sequencing-quality assessment of RNA-seq analysis.
Bulk	Date and time	Number of raw paired-end reads	Accession number
1	15 May, 3:30	18223360	DRX379811
2	7:30	20499393	DRX379812
3	11:30	20333844	DRX379813
4	15:30	19291513	DRX379814
5	19:30	20247122	DRX379815
6	23:30	18609646	DRX379816
7	27:30	19050326	DRX379817
8	16 June, 3:30	19972457	DRX379804
9	7:30	17431989	DRX379805
10	11:30	20755616	DRX379806
11	15:30	16638618	DRX379807
12	19:30	20295582	DRX379808
13	23:30	17917130	DRX379809
14	27:30	20703071	DRX379810
15	14 July, 3:30	17300717	DRX379797
16	7:30	18101585	DRX379798
17	11:30	18164843	DRX379799
18	15:30	19029808	DRX379800
19	19:30	20093098	DRX379801
20	23:30	17703691	DRX379802
21	27:30	19066495	DRX379803

## Sheet: Supplementary Table 2
Supplementary Table 2. All contigs obtained via RNA-seq analysis.
Transcript ID	15 May 2020							16 June 2020							14 July 2020							vs Arabidopsis thaliana			vs Uniplot
	3:30	7:30	11:30	15:30	19:30	23:30	27:30	3:30	7:30	11:30	15:30	19:30	23:30	27:30	3:30	7:30	11:30	15:30	19:30	23:30	27:30	TAIR_ID	E-value	Description	UniProtKB	E-value
TRINITY_DN0_c10_g1_i1.p1	90.13	77.34	85.95	92.14	74.07	88.69	80.78	106.62	78.99	97.02	96.52	124.04	70.88	79.24	78	82.63	78.82	87.18	77.4	94.26	99.01	AT5G45040.1	1.68e-60	Cytochrome c6, chloroplastic [Source:UniProtKB/Swiss-Prot;Acc:Q93VA3]	CYC6_ARATH	1.66e-59
TRINITY_DN0_c1_g1_i17.p1	8.5	8.52	6.8	7.44	11.54	9.93	10.83	10.5	14.39	6.53	6.95	16.96	14.06	12	15.21	16.21	17.28	20.78	30.98	14.4	14.18	AT5G46330.2	0	LRR receptor-like serine/threonine-protein kinase FLS2 [Source:UniProtKB/Swiss-Prot;Acc:Q9FL28]	FLS2_ARATH	0
TRINITY_DN0_c1_g1_i7.p1	0	0	0	0	0.21	0	0	0.41	1.43	0	0	0	0.69	0	0.44	1.76	0	1.8	2.99	0.43	0.58	AT5G63930.1	5.92e-43	Probable leucine-rich repeat receptor-like protein kinase At5g63930 [Source:UniProtKB/Swiss-Prot;Acc:Q9LVP0]	FLS2_ORYSJ	3.81e-46
TRINITY_DN0_c3_g1_i3.p1	70.05	59.34	47.6	26.2	56.29	75.51	62.73	78.22	71.94	53.57	46.17	46.91	56.74	54.85	48.05	42.67	48.89	40.18	69.44	59.01	60.02	AT4G24530.1	0		OFT31_ARATH	0
TRINITY_DN0_c3_g1_i7.p2	20.02	21.93	21.22	18.91	30.95	21.81	25.16	33.92	32.42	25.59	23.48	25.92	30.33	29.73	35.21	30.28	36.01	30.6	43.55	29.85	40.18	AT5G04840.1	2.28e-41		BZP34_ARATH	7.45e-16
TRINITY_DN0_c4_g1_i1.p1	25.6	27.5	24.81	8.6	15.53	17.01	21.01	30.25	43.89	23.03	15.97	17.48	25.25	29.02	80.28	63.82	80.39	33.3	39.55	42.54	50.43	AT4G17900.1	1.08e-88		RITF1_ARATH	3.15e-36
TRINITY_DN0_c7_g1_i2.p1	435.38	520.65	649.18	476.77	504.34	552.33	549.76	711	579.08	566.88	492.75	723.02	635.03	562.43	725.51	650.02	726.55	735.62	765.15	680.06	740.93	AT4G11600.1	5.29e-102	Probable phospholipid hydroperoxide glutathione peroxidase 6, mitochondrial [Source:UniProtKB/Swiss-Prot;Acc:O48646]	GPX6_ARATH	5.2e-101
TRINITY_DN0_c9_g2_i1.p1	0.36	2.93	2.46	2.12	4.5	4.53	2.61	3.99	3.52	4.25	4.32	6.09	9.11	6.92	5.7	5.45	4.57	11.33	12.96	7.94	7.4	AT5G06900.1	4.37e-46		C93A3_SOYBN	3.71e-60
TRINITY_DN100013_c0_g1_i1.p1	0	0	0	0	0	0	0	0	0	0	0	0	0	0	0	0	0	0	0	0	0.52	AT5G59840.1	1.21e-96		RAE1C_ARATH	1.73e-95
TRINITY_DN10001_c0_g1_i7.p1	6.2	8.27	5.7	3.53	8.48	9.96	7.22	8.83	7.12	8.26	9.9	6.11	8.64	6.91	16.4	11.61	10.87	12.35	18.62	18.72	19.68	AT1G76920.1	2.97e-133	SKP1-interacting partner 15 [Source:UniProtKB/Swiss-Prot;Acc:O49279]	SKI15_ARATH	2.92e-132
TRINITY_DN100020_c0_g1_i1.p1	0	0.48	0.44	0	0	0	0	0	0	0.4	0	0	0	0	0	0	0	0	0	0	0
TRINITY_DN10002_c0_g1_i1.p1	1.48	0.27	0.26	2.1	1.15	2.17	0	1.38	2.59	0.95	0.32	1.88	1.87	2.33	2.97	1.8	2.04	0.81	1.61	1.15	1.55
TRINITY_DN10003_c0_g1_i1.p1	40.61	40.72	41.16	39.89	46.09	49.82	48.49	72.62	80.48	56.74	39.85	56.63	63.78	63	112.58	102.76	101.95	107.39	132.28	130.09	142.29	AT5G58640.2	7.05e-83		SELT_ARATH	5.82e-80
TRINITY_DN100043_c0_g2_i1.p1	1.12	1.58	1.93	0.68	0	0	0.6	0.53	0	0	0	0	0.62	0	0	0.59	0.55	0	1.53	0	0.47	ATMG00750.1	3.18e-06	Uncharacterized mitochondrial protein AtMg00750 [Source:UniProtKB/Swiss-Prot;Acc:P92516]
TRINITY_DN100055_c0_g1_i1.p1	0	0	0	0	0	0	0	0	0.49	0	0	0	0	0	0	0	0	0	0	0	0.38	AT2G38810.2	3.32e-69	Probable histone H2A variant 2 [Source:UniProtKB/Swiss-Prot;Acc:Q9SII0]	H2AV3_ORYSJ	9.23e-81
TRINITY_DN100071_c0_g1_i1.p1	0.31	0	0	0	0	0	0	0	0	0	0	0	0	0	0	0.32	0	0	0	0.6	0.27				AN321_ORYSJ	5.22e-12
TRINITY_DN100075_c0_g1_i3.p1	0.2	0	0.13	0.09	0	0.1	0.1	0.56	0	0	0.1	0	0.1	0	0.2	0.46	0.18	0	0.65	1.36	0.19	ATMG00860.1	1.82e-44	Uncharacterized mitochondrial protein AtMg00860 [Source:UniProtKB/Swiss-Prot;Acc:P92523]	POL2_DROME	1.45e-109
TRINITY_DN100075_c1_g1_i1.p1	0.14	0.12	0.15	0.26	0.73	0.14	0.28	0.25	0.82	0.28	0.43	0.19	0.21	0.3	0.28	1.25	0.46	0.82	0.64	1.34	0.22	ATMG00860.1	1.37e-43	Uncharacterized mitochondrial protein AtMg00860 [Source:UniProtKB/Swiss-Prot;Acc:P92523]	YG31B_YEAST	1.06e-132
TRINITY_DN100075_c2_g1_i1.p1	0	0	0	0	0.32	0	0	0	0	0	0.36	0	0	0	0	0	0	0	0	0.32	0				YI31B_YEAST	4.9e-11
TRINITY_DN10007_c0_g1_i1.p1	4.6	4.22	3.88	2.72	4.13	4.55	4.13	4.96	6.23	4.18	4.62	5.45	4.44	6.19	7.69	5.01	6.58	5.72	7.74	6.18	4.64	AT3G63340.7	0	Probable protein phosphatase 2C 51 [Source:UniProtKB/Swiss-Prot;Acc:Q93YS2]	Y3333_ARATH	2.01e-162
TRINITY_DN10008_c0_g1_i1.p1	37.8	34.13	31.89	21.53	24.17	24.11	25.45	28.2	24.07	35.37	34.54	26.16	23.56	26.13	26.88	25.23	25.16	28.84	20.52	19.77	17.67	AT1G79080.1	0	Pentatricopeptide repeat-containing protein At1g79080, chloroplastic [Source:UniProtKB/Swiss-Prot;Acc:A3KPF8]	PP131_ARATH	0
TRINITY_DN100092_c0_g1_i1.p1	0.19	0	0	0	0	0	0	0.17	0	0.15	0.2	0.17	0	0	0	0.56	0	0	0.34	0	0	AT4G23160.2	1.07e-50		POLR1_ARATH	4.26e-50
TRINITY_DN100094_c0_g1_i3.p1	0	0	0	0.88	0	0	0	0	0	0	0	0	0	0	0	0	0	0	0	0	0	AT1G74730.1	2.34e-30
TRINITY_DN100098_c0_g1_i2.p1	0	0	0	0	1.05	0.59	1.73	3.56	1.79	0.42	1.24	1.89	1.77	0.48	3.72	1.68	3.19	1.46	2.45	2.61	2.27
TRINITY_DN100098_c0_g2_i1.p1	0.19	0	0.17	0.23	0	0.2	0.2	0.18	1.05	0	0.2	0.18	0	0.17	0.39	0	0	0	0	0	0.17
TRINITY_DN100098_c1_g1_i1.p1	0.13	0	0.11	0.3	0	0.13	0.13	0.95	0.14	0	0.54	0.12	0.8	0	0.52	0.26	0.25	0.47	0.12	0	0	AT2G01050.1	3.04e-13
TRINITY_DN100098_c1_g1_i1.p2	0.75	0	0.65	0	0.37	0	0	0.7	0.41	0.3	1.25	0	0	0	0.38	1.15	0	0.34	0.34	0	0
TRINITY_DN100098_c1_g4_i1.p2	0	0	0	0	0	0	0	0.23	0	0	0	0.22	0	0	0	0	0	0	0.22	0.47	0
TRINITY_DN10009_c0_g1_i10.p1	5.31	5.42	8.02	5.17	9.67	14.52	7.65	10.33	7.91	9.79	9.64	14.86	13.1	9.56	14.18	10.23	12.28	14.91	23.06	17.16	15.19	AT1G29690.1	0	MACPF domain-containing protein CAD1 [Source:UniProtKB/Swiss-Prot;Acc:Q9C7N2]	CAD1_ARATH	0
TRINITY_DN10009_c0_g1_i7.p1	4.36	4.94	6.59	3.67	8.68	13.03	10.61	14.74	12.14	12.3	4.4	8.91	13.97	12.37	18.39	9.76	8.7	14.07	20.33	16.27	11.86	AT1G29690.1	0	MACPF domain-containing protein CAD1 [Source:UniProtKB/Swiss-Prot;Acc:Q9C7N2]	CAD1_ARATH	0
TRINITY_DN1000_c0_g1_i1.p1	20.79	19.38	29.71	13.59	11.71	8.79	15.47	29.09	30.49	16.81	23.26	16.82	15.37	27.73	40.01	42.05	34.5	19.41	21.1	24.9	40.2	AT4G24190.2	6.48e-94	Endoplasmin homolog [Source:UniProtKB/Swiss-Prot;Acc:Q9STX5]	ENPL_CATRO	1.56e-99
TRINITY_DN1000_c0_g1_i4.p1	19.08	25.05	77.41	40.94	27.66	18.89	17.66	29.25	42.73	44.69	64.33	33.66	25.55	24.8	47.84	36.34	51.22	42.34	53.61	43.63	48.81	AT4G24190.1	0	Endoplasmin homolog [Source:UniProtKB/Swiss-Prot;Acc:Q9STX5]	ENPL_ARATH	0
TRINITY_DN1000_c2_g1_i7.p1	67.8	56.84	37.29	25.47	68.58	111.62	67.55	92.31	69.76	59.97	46.7	82.06	94.42	72.41	62.3	68.51	70.15	77	105.21	90.61	67.24	AT2G02960.1	1.05e-63		MARH3_MOUSE	2.13e-08
TRINITY_DN1000_c3_g1_i1.p1	180.46	197.67	112.99	96.41	140.71	152.72	190.85	203.71	156.73	130.08	137.71	157.71	184.81	216.38	201.08	249.9	194.85	183.08	124.91	120.57	132.55	AT3G09050.1	3.49e-77
TRINITY_DN1000_c4_g1_i1.p1	2.13	4.97	1.25	7.08	10.55	5.96	1.64	2.14	5.3	1.94	8.33	1.9	4.68	6.69	5.77	3.85	3.38	8.09	4.17	2.48	1.79				YG31B_YEAST	1.14e-07
TRINITY_DN1000_c4_g1_i2.p1	8.24	2.66	5.08	2.09	5.41	5.85	1.22	5.73	3.53	4.93	3.82	5.29	4.95	4.63	4.71	5.05	6.37	4.27	6.14	2.85	1.8
TRINITY_DN1000_c4_g1_i7.p1	0	0	2.13	0	2.15	1.86	2.06	1.2	0	2.69	2.29	0.86	1.51	0	0	1.96	1.19	0.5	0.59	0.54	0				YG31B_YEAST	6.78e-08
TRINITY_DN1000_c4_g3_i1.p1	10.38	10.79	11.07	11.16	15.44	22.29	14.38	18.04	7.2	18.81	10.56	13.92	29.38	21.25	29.14	22.23	20.23	16.51	25.27	10.03	10.83				YG31B_YEAST	4.07e-17
TRINITY_DN1000_c4_g4_i1.p1	4.27	3.73	4.39	5.6	3.48	5.48	4.87	14.27	5.03	5.49	7.34	16.11	18.62	8.45	31.31	8.6	16.57	21.75	15.4	8.86	3.97	ATMG00860.1	4.24e-28	Uncharacterized mitochondrial protein AtMg00860 [Source:UniProtKB/Swiss-Prot;Acc:P92523]	YI31B_YEAST	2.46e-144
TRINITY_DN1000_c5_g1_i2.p1	20.68	22.11	25.02	15.43	19.7	21.76	15.63	24.18	26.61	21.47	33.88	23.12	18	25.48	31.95	29.43	23.64	30.52	34.17	32.56	37.85	AT1G70190.1	7.56e-68		RL7_LIBAF	3.75e-17
TRINITY_DN1000_c7_g1_i2.p1	0.23	1.04	0.8	0	0.22	0.48	0.48	0.43	1.26	0	0.25	0.63	0.48	0.6	0.7	0.93	0.68	0.42	0.84	0.89	0.2				POLR1_ARATH	9.99e-11
TRINITY_DN1000_c8_g1_i3.p1	0.4	0.35	0.23	0.15	0.13	0.27	0.4	0.12	0.43	0.32	0.41	0.12	0.27	0.45	1.34	0.79	0.78	0.96	0.48	0.13	0.35	ATMG00710.1	2.86e-06	Uncharacterized mitochondrial protein AtMg00710 [Source:UniProtKB/Swiss-Prot;Acc:P92512]	POLX_TOBAC	9.02e-32
TRINITY_DN100122_c0_g1_i1.p1	0	0.38	0	0	0.41	0	0	0.4	0	0.17	0	0.39	0	0	0	0	0.21	1.95	0.39	0.21	0.19	AT2G16120.1	4.96e-124	Putative polyol transporter 1 [Source:UniProtKB/Swiss-Prot;Acc:Q9XIH7]	PLT1_ARATH	4.88e-123
TRINITY_DN100136_c0_g1_i1.p1	0	0.31	0.29	0	0	0	0	0	0	0	0	0	0	0.3	0	0	0	0.62	0	0	0				POLR1_ARATH	2.26e-33
TRINITY_DN100136_c0_g1_i1.p2	0	0	0	0	0	0	0	0.32	0	0	0.38	0.31	0	0	0.34	0	0	0.31	0.31	0	0	ATMG00810.1	1.74e-38	Uncharacterized mitochondrial protein AtMg00810 [Source:UniProtKB/Swiss-Prot;Acc:P92519]	POLR2_ARATH	1.68e-49
TRINITY_DN100136_c0_g1_i3.p1	0	0	0	0	0	0	0	0	0	0	0	0	0	0	0	0	0	0.36	0	0	0				POLR1_ARATH	2.22e-33
TRINITY_DN100161_c0_g1_i3.p1	13.72	11.89	13.74	9.65	11.9	12.88	11.1	18.65	17.16	17.16	16.15	18.55	16.24	18.69	19	19.03	17.95	15.77	22.45	23.14	21.99	AT3G08505.1	7.61e-156	E3 ubiquitin-protein ligase makorin [Source:UniProtKB/Swiss-Prot;Acc:Q6IDS6]	C3H41_ORYSJ	6.45e-169
TRINITY_DN10017_c0_g3_i1.p1	160.27	136.51	121.14	108.99	184.51	285.56	245.55	292.4	340.02	135.9	104.86	236.68	200.99	253.76	567.49	470.58	444.35	495.33	691.27	1029.79	1217.17	AT3G12630.1	9.41e-34	Zinc finger A20 and AN1 domain-containing stress-associated protein 5 [Source:UniProtKB/Swiss-Prot;Acc:Q9LHJ8]	SAP5_ARATH	9.26e-33
TRINITY_DN10018_c2_g2_i1.p1	3.16	2.13	4.32	3.72	3.31	2.74	0.54	0.98	1.72	3.8	1.7	2.64	1.1	1.38	5.28	4.24	3.89	5.26	4.3	2.55	2.77	AT3G06240.1	4.52e-18	F-box/kelch-repeat protein At3g06240 [Source:UniProtKB/Swiss-Prot;Acc:Q8GXC7]	FBK50_ARATH	4.45e-17
TRINITY_DN10018_c2_g2_i4.p1	0.76	0.84	1.14	0	0.36	1.36	0.58	0.87	0.82	1.07	0.4	0.87	1.17	0.33	0.57	1.32	0.93	1.2	1.2	0.37	0.33	AT3G06240.1	2.09e-27	F-box/kelch-repeat protein At3g06240 [Source:UniProtKB/Swiss-Prot;Acc:Q8GXC7]	FBK50_ARATH	2.06e-26
TRINITY_DN1001_c0_g1_i11.p1	143.51	129.41	128.7	94.72	120.66	122.93	102.69	126.87	112.68	131.04	146.59	115.49	138.43	141.77	133.58	126	128.7	125.31	154.65	174.54	185.3	AT5G59240.1	2.25e-107	40S ribosomal protein S8-2 [Source:UniProtKB/Swiss-Prot;Acc:Q9FIF3]	RS8_MAIZE	6.51e-117
TRINITY_DN10020_c0_g1_i4.p1	1.98	2.05	1.91	1.08	1.12	2.25	1.3	3.63	2.26	1.9	3.39	3.03	4.05	3.4	3.54	3.45	2.29	2.65	3.38	3.94	3.34	AT5G59980.3	1.39e-14		GAF1_ARATH	1.6e-13
TRINITY_DN100232_c0_g1_i1.p1	0.47	0.41	0.1	0.14	0.34	0.84	0	0.54	0.63	0.38	0.12	0	0.96	1.11	0.59	0.35	0.23	0.21	0.11	0	0
TRINITY_DN100232_c0_g2_i1.p1	0	0	0	0.63	0.51	0	0	0	0	0	0	0	0	0	0	0	0.51	0.47	0	0	0
TRINITY_DN10023_c0_g1_i1.p1	9.55	11.92	17.48	18.07	15.68	15.7	14.8	20.49	26.17	22.96	21.74	21.75	31.67	22.51	28.11	25.31	30.71	30.08	35.23	15.87	11.9
TRINITY_DN100249_c0_g1_i2.p1	0	0	0	0	0	0	0	0	0	0	0	0.45	0	0	0.51	0	0	0	0	0	0
TRINITY_DN100249_c0_g1_i4.p1	1.16	0.54	0	0	0	0	0	0.55	0	0.45	0	0	0	0	0	0	0	0	0	0	0
TRINITY_DN10024_c0_g1_i1.p1	17.4	13.6	38.08	29.41	34.74	20.6	9.61	43.38	74.85	52.94	56.1	61.9	49.13	37.58	30.89	72.54	66.77	65.87	28.89	20.8	15.56	AT4G39490.1	0		C96AF_ARATH	2.12e-173
TRINITY_DN10024_c0_g3_i2.p1	0	0	0.39	0	1.33	0.97	3.85	1.7	0.5	0	0	1.21	0.98	0.4	0.9	1.4	1.79	3.29	5.36	0.88	6.57
TRINITY_DN100250_c0_g1_i1.p2	0	0	0	0	0	0	0	0	0	0	0	0	0	0	1.19	0	0	0	0	0	1.01				ATP7_ASPTN	6.92e-80
TRINITY_DN100258_c0_g1_i1.p1	0	0.39	0	0	0	0	0	0	0	0.67	0.47	0	0	0	0	0.87	0	0	0	0	0				POLR1_ARATH	7.34e-11
TRINITY_DN10025_c0_g1_i12.p1	3.06	4.61	0	1.64	0	1.35	0.75	1.1	1.03	2.45	2.6	1.77	3.24	0.79	2.58	1.4	0	1.86	0.56	0.67	5.42	AT1G69010.1	1.67e-64	Transcription factor BIM2 [Source:UniProtKB/Swiss-Prot;Acc:Q9CAA4]	BIM2_ARATH	1.64e-63
TRINITY_DN10025_c0_g1_i5.p1	4.59	2.26	5.03	1.42	3.62	5.38	4.17	5.72	8.84	4.16	4.71	6.03	4.83	6.47	6.67	9.04	12.28	8.33	14.19	13.91	6.49	AT1G69010.1	2.55e-73	Transcription factor BIM2 [Source:UniProtKB/Swiss-Prot;Acc:Q9CAA4]	BIM2_ARATH	2.51e-72
TRINITY_DN10025_c1_g1_i1.p1	9.92	10.78	8.74	7.89	6.68	10.84	9.74	11.69	11.62	7.04	10.71	16.75	11.08	14.07	26.36	21.36	17.15	12.61	28.02	23.76	34.21	AT1G03970.1	6.61e-17	G-box-binding factor 4 [Source:UniProtKB/Swiss-Prot;Acc:P42777]	GBF4_ARATH	6.5e-16
TRINITY_DN10026_c0_g2_i1.p1	11.62	12.92	10.15	7.68	10.31	11.99	11.73	12.92	13.58	10.8	10.02	11	13.94	12.82	19.5	16.83	16.68	15.11	20.41	19.03	16.21	AT3G17900.1	0
TRINITY_DN100280_c0_g1_i1.p1	0.5	0	0	0	0	0	0	0	0	0	0	0	0	0	0.99	0	0	0	0.45	0	0.42	AT3G31430.1	4.58e-10
TRINITY_DN10028_c0_g1_i1.p1	4.95	4.17	3.79	2.89	5.28	4.62	4.73	7.15	6.27	3.96	4.31	7.57	10.72	7	6.43	3.38	3.56	5.65	6.41	7.08	5.72	AT1G62870.1	0
TRINITY_DN10029_c0_g1_i8.p1	47.47	53.43	46.16	49.7	47.24	49.79	49.78	55.15	63.24	57.46	60.25	53.26	67.3	59.39	65.88	70.04	68.14	71.23	83.3	60.97	61.68	AT5G61910.5	1.65e-36		NRP_ARATH	2.19e-18
TRINITY_DN1002_c0_g1_i2.p1	24.63	18.21	19.66	12.84	17.79	14.74	23.99	14.42	14.96	17.67	20.37	24.97	14.24	25.94	24.77	27.29	34.18	29.63	28.77	24.13	19.58
TRINITY_DN1002_c0_g1_i7.p1	21.86	25.03	19.16	15	15.09	11.76	17.84	16.23	26.38	15.54	15.92	18.58	27.61	24.52	16.6	28.9	18.61	23.48	19.49	20.59	12.13	AT1G40087.1	1.61e-06
TRINITY_DN1002_c0_g2_i1.p1	1.84	0	1.19	1.1	2.68	2.46	1.46	2.15	1.52	2.16	0	0.81	0.99	1.64	2.73	1.89	1.81	2.91	1.25	0.44	1.17
TRINITY_DN100309_c0_g1_i1.p1	0	0	0	0	0	0	0	0	0.42	0	1.68	0	0	0	0	0	0	0	0.35	0	0	ATMG00300.1	4.49e-06	Uncharacterized mitochondrial protein AtMg00300 [Source:UniProtKB/Swiss-Prot;Acc:P93293]	POLR2_ARATH	1.47e-26
TRINITY_DN10030_c0_g1_i1.p1	8.5	8.7	7.48	7.65	7.6	5.77	6.66	8.81	9.68	5.82	8.14	7.58	6.48	6.9	6.78	6.6	8.56	11.36	10.17	5.37	7.13	AT5G10630.1	0		HBS1L_PONAB	2.35e-124
TRINITY_DN10030_c0_g1_i1.p2	3.61	0	0	0	1.33	1.08	1.27	0.6	1.19	0.61	0	1.96	0.84	0	0	0	0	0	0	0.58	0	AT5G10630.3	5.77e-08
TRINITY_DN10030_c0_g1_i10.p1	0	0	0	0	0.41	0.35	1.04	2.2	0.36	0.32	0.84	0	0.35	0.99	0	0.45	1.03	0	0	0	0
TRINITY_DN10030_c0_g1_i3.p1	1.26	1.55	0.24	0.94	0.8	0.83	0.63	1.2	0.56	0.17	0	1.99	0.99	0.89	0.8	0.66	0.42	1.22	0.41	0	0.32	AT5G10630.3	2.44e-27
TRINITY_DN10030_c0_g1_i4.p1	0.25	0	1.29	0	0.47	0.23	0.69	0.46	0.25	0.37	0	0.24	0.24	0.22	0	0.67	0.46	0	0.22	0.23	0	AT5G10630.1	5.81e-103		HBS1L_BOVIN	4.77e-67
TRINITY_DN10030_c0_g1_i6.p1	0.94	0.49	2.07	0	0	2.15	0.72	1.84	2.68	0	0	0.9	0.96	1.49	0.68	0.91	2.09	1.48	2.68	1.98	0.46	AT5G10630.1	2.43e-21
TRINITY_DN10030_c0_g1_i8.p1	0.32	3.44	0.35	1.29	0.6	0	0.53	0	0.19	2.1	4.12	0.3	0.24	0	2.39	0.47	0	1.37	2.18	0	0.44	AT5G10630.1	1.99e-21
TRINITY_DN10031_c0_g3_i1.p1	200.37	159.18	141.94	103.78	138.3	141.04	123.15	107.31	112.06	102.81	122.23	90.4	109.88	88.09	16.94	19.6	18.88	19.82	13.76	14.78	13.76	AT5G04660.1	0	Cytochrome P450 77A4 [Source:UniProtKB/Swiss-Prot;Acc:Q9LZ31]	C77A2_SOLME	0
TRINITY_DN100328_c0_g1_i2.p1	0	0	0	0	0	0	0	0	0	0	0	0	0	0	0	0	0.46	0	0	0	0	AT3G50670.2	1.62e-78	U1 small nuclear ribonucleoprotein 70 kDa [Source:UniProtKB/Swiss-Prot;Acc:Q42404]	RU17_ARATH	7.57e-75
TRINITY_DN10032_c0_g1_i4.p1	0	0.35	0.66	0	0	0	0	0	0.42	0.3	0	0	0	1.35	0	0.78	0.75	0	0	0	0.33	AT3G09510.1	5.79e-06		RNHX1_ARATH	4.82e-06
TRINITY_DN10032_c0_g1_i5.p1	1.67	0.62	0.47	0	0	0.18	0.9	0.39	0.38	0.28	0.37	0.49	0.54	0.5	0.89	0.52	0.52	0.48	0.95	0.34	0	AT3G09510.1	7.82e-13		RNHX1_ARATH	2.67e-14
TRINITY_DN10032_c0_g1_i6.p1	1.51	0.13	0.86	0.5	1.1	0.44	0.44	0.61	0	0.93	0.15	0.66	1.18	1.07	0.58	0.28	0.56	0	0.52	0.14	0	AT4G04650.1	2.57e-12		RNHX1_ARATH	9.43e-13
TRINITY_DN10034_c0_g1_i13.p1	10.52	7.21	7.13	4.65	5.44	7.65	9.99	13.16	6.15	6.05	6.14	4.47	8.17	8.89	10.89	9.5	6.84	6.89	7.5	3.84	3.82
TRINITY_DN10034_c1_g1_i1.p1	0.85	0.82	0.58	0.35	0.32	0.46	0.38	0.58	0.51	0.51	0.62	0.54	0.84	0.46	0.53	0.94	1.39	1.13	1.17	0.19	0.54				YG31B_YEAST	9.85e-18
TRINITY_DN10034_c1_g1_i11.p1	2.42	0.48	0.47	0.64	0.11	0.45	0.78	0.91	0.95	0.27	0.11	0.1	0.11	0.56	0.56	0.65	0.86	0.54	0.3	0	0.2				YI31B_YEAST	8.47e-29
TRINITY_DN10034_c1_g1_i12.p1	0.74	0.68	0.28	0.63	0.7	0.38	0.25	0.53	1.35	0.59	1.06	0.87	0.99	0.7	1.29	1.63	1.44	0.86	0.89	0.38	0				YI31B_YEAST	1.55e-28
TRINITY_DN10034_c2_g1_i1.p1	0.42	0.37	0.18	0.24	0.61	0.64	0.64	0.87	1.25	0.26	0	0.59	0.86	0.81	1.6	1.66	0.72	1.15	1.33	0.71	0.28				POL2_DROME	1.88e-35
TRINITY_DN100350_c0_g1_i1.p1	0.71	0.13	0.12	0.17	0.27	0.15	0.58	0.52	0.46	0.46	0.6	0.26	0.15	0.12	0.29	0	0.28	0.39	0.13	0.28	0
TRINITY_DN100350_c0_g1_i1.p2	0.28	0	0	0	0	0	1.45	0.26	0	0.22	0	0	0	0	1.12	0	0	0	0	0	0				YI31B_YEAST	9.64e-25
TRINITY_DN100350_c0_g1_i1.p3	0	0.26	0	0.35	0.28	0	0	0.54	0.32	0.47	0.32	0.26	0.31	0.26	0.88	0.29	0.57	0.26	0	0	0	ATMG00860.1	1.95e-44	Uncharacterized mitochondrial protein AtMg00860 [Source:UniProtKB/Swiss-Prot;Acc:P92523]	POL3_DROME	1.56e-56
TRINITY_DN10035_c0_g1_i1.p1	26.8	25.47	18.09	15.18	22.63	20.95	24.17	22.27	19.45	24.73	21.78	17.36	19.43	20.03	35.4	24.28	24.77	23.25	36.75	38.03	33.13	AT3G07810.1	1.5e-142		RNP1_ARATH	3.77e-71
TRINITY_DN10035_c0_g3_i2.p1	39.21	31.52	36.62	30.52	38.33	41.51	35.84	34.45	34.12	35.47	35.7	24.44	34.82	30.52	33.86	36.3	35.47	39.07	39.57	38.25	34.09	AT3G07810.1	1.23e-153		RNP1_ARATH	1.96e-72
TRINITY_DN100364_c0_g2_i2.p1	0.72	1.07	0.21	0	0.69	1	0.49	0.22	0.26	0.77	0	0.22	0.75	0.21	0.24	0.48	0.24	0	0	0	0	AT3G63095.1	5.75e-16
TRINITY_DN10036_c0_g1_i1.p1	59.34	61.08	65.51	46.78	61.3	73.34	59.82	82.61	83.3	74.46	89.94	88.98	86.79	89.23	156.25	119.74	120.65	111.08	164.42	154.17	133.86	AT5G08570.1	0		KPYC_SOLTU	0
TRINITY_DN10037_c0_g2_i5.p1	1138.41	1120.06	1109.71	1014.88	987.3	1040.96	1078.53	792.94	702.73	859.36	966.71	798.59	840.98	816.19	627.9	656.08	693.28	697.6	524.63	749.55	676.76	AT2G24090.1	4.61e-45	50S ribosomal protein L35, chloroplastic [Source:UniProtKB/Swiss-Prot;Acc:Q8VZ55]	RK35_ARATH	4.54e-44
TRINITY_DN100380_c0_g1_i1.p1	0	0	0	0	0	0	0.18	0	0.39	0.15	0	0.33	0	0	0.18	0	0	0	0.16	0	0	AT5G19760.1	6.13e-176	Mitochondrial dicarboxylate/tricarboxylate transporter DTC [Source:UniProtKB/Swiss-Prot;Acc:Q9C5M0]	DTC_ARATH	6.03e-175
TRINITY_DN100385_c0_g1_i1.p2	0	0	0	0	0	0	0	0	0	0	0	0	0	0	0.61	0	0	0	0	0	0	AT2G44690.1	8.23e-14	Rac-like GTP-binding protein ARAC9 [Source:UniProtKB/Swiss-Prot;Acc:Q9XGU0]	RHO2_SCHPO	3.88e-32
TRINITY_DN10038_c0_g3_i3.p1	0.82	0.69	0.71	0	0	0	0.87	0.42	0.45	0.3	0	0.4	3.1	0.76	0.89	0.78	1.76	0.72	0	0.73	0	AT4G33950.2	2.26e-114	Serine/threonine-protein kinase SRK2E [Source:UniProtKB/Swiss-Prot;Acc:Q940H6]	SAPK2_ORYSI	1.25e-116
TRINITY_DN10039_c0_g1_i1.p1	2.84	3.56	2.89	1.17	2.73	4.11	2.72	2.76	4.88	4.06	3.33	3.54	3.78	3.45	4.38	5.47	4.1	3.34	4.38	2.42	5.94	AT5G54930.2	8.87e-19		MNM1_ARATH	9.86e-18
TRINITY_DN10040_c0_g1_i1.p1	12.34	11.99	22.62	18.79	20.86	23.06	18.88	20.97	28.21	19.53	14.96	22.2	19.78	21.21	37.67	39.61	40.21	41.88	61.59	56.07	42.79	AT1G32790.2	1.23e-40	Polyadenylate-binding protein-interacting protein 11 [Source:UniProtKB/Swiss-Prot;Acc:Q9LPI5]	CID11_ARATH	1.42e-39
TRINITY_DN10043_c0_g1_i10.p1	1.7	1.14	2.56	1.74	1.84	2.63	1.09	1.06	1.61	1.88	2.48	2.14	1.98	1.1	0.21	0.21	0.62	0.58	0.38	0.82	0.45	AT5G62710.2	2.38e-154		FEI2_ARATH	5.23e-121
TRINITY_DN10043_c0_g1_i2.p1	0.64	0.38	0.73	1.24	0.41	0.22	0	0	0.92	0.34	0.68	0.39	0.44	1.1	0	0.21	0	0.19	0	0	0	AT5G62710.1	9.08e-97		FEI1_ARATH	1.25e-43
TRINITY_DN10043_c0_g1_i8.p1	0.56	0.76	0.73	0.67	1.36	1.18	0	1.45	0.31	0.45	1.22	0.51	1.18	0.74	1.69	1.7	1.11	0	2.3	2.73	0.63	AT5G62710.2	1.42e-84		FEI2_ARATH	3.62e-36
TRINITY_DN100455_c0_g1_i1.p1	0	0	0	0	0	0	0	0	0	0	0	0	0.4	0	0	0	0.76	0	0	0	0	AT2G13450.1	1.47e-16		Y4200_ARATH	2.43e-10
TRINITY_DN10045_c0_g1_i4.p1	34.56	38.39	22.75	20.38	44.85	53.57	55.82	50.37	50.68	30.67	31.79	52.38	51.02	70.36	97.32	89.24	50.5	56.95	87.72	127.67	117.46	AT5G16110.1	1.32e-22
TRINITY_DN10046_c0_g1_i1.p1	38.88	42.56	50.28	44.35	45.97	43.74	42	43.09	41.53	53.85	58.49	48.19	42.27	42.17	39.74	35.82	42.85	48.04	47.01	39.28	35.62	AT5G23140.1	1.33e-135	ATP-dependent Clp protease proteolytic subunit 2, mitochondrial [Source:UniProtKB/Swiss-Prot;Acc:Q9FN42]	CLPP2_ARATH	1.31e-134
TRINITY_DN100473_c0_g1_i1.p1	0.32	0.66	0	0	0.31	0.11	0.65	0.49	0.23	0.26	0.33	0.4	1.32	0.37	1.2	0.95	0.95	1.17	0.68	0.21	0	AT4G20140.1	1.26e-80	LRR receptor-like serine/threonine-protein kinase GSO1 [Source:UniProtKB/Swiss-Prot;Acc:C0LGQ5]	GSO1_ARATH	1.24e-79
TRINITY_DN100486_c0_g1_i1.p1	0.2	0	0	0	0	0	0.21	0.74	0.44	0	0	0	0.21	0.52	0	0	0	0	0	0	0	AT1G27870.1	3.23e-11		RNHX1_ARATH	3.59e-08
TRINITY_DN1004_c0_g1_i1.p1	8.94	8.75	9.3	8.5	7.61	6.84	8.73	10.67	9.64	12.88	12.69	11.41	10.85	10.15	12.01	10.3	12.52	12.25	11	9.03	9.39	AT4G21770.1	0	RNA pseudouridine synthase 6, chloroplastic [Source:UniProtKB/Swiss-Prot;Acc:Q9SVS0]	PUS6_ARATH	0
TRINITY_DN1004_c0_g2_i1.p1	1.39	0.63	0	0	0	1.71	3.19	0	0	1.14	0.89	0	0.74	2.67	0	4.19	1.47	0	0	0.69	0
TRINITY_DN1004_c0_g2_i4.p1	8.2	6.94	6.18	5.54	7.46	6.11	6.14	9.21	10.47	8.67	7.93	9.02	7.89	7.68	10.01	9.83	10.21	10.02	13.71	7.1	6.77	AT1G64570.1	6.93e-74
TRINITY_DN10051_c0_g1_i9.p1	38.74	44.2	40.49	28.28	25.63	31.54	37.05	39.71	41.45	32.78	41.15	29.12	39.08	42.82	34.45	40.56	30.52	30.75	29.27	35.25	43.4	AT5G01020.1	0	Serine/threonine-protein kinase At5g01020 [Source:UniProtKB/Swiss-Prot;Acc:Q8GXZ3]	PBL8_ARATH	0
TRINITY_DN10051_c0_g3_i1.p1	9.18	8.94	12.15	12.41	15.85	25.17	11.8	16.23	17.14	16.66	15.8	17.29	19.62	14.25	11.49	12.68	16.75	15.24	30.22	18.89	14.16	AT2G07180.2	0		PBL17_ARATH	0
TRINITY_DN100528_c0_g1_i1.p1	0.69	0.6	0.39	0.27	0.33	0.7	0.23	0.52	0.62	1.3	0.12	1.7	0.7	1.08	0.46	0.56	1.12	0.73	1.03	0.88	0.92	AT4G31250.1	1.45e-132	Probable LRR receptor-like serine/threonine-protein kinase At4g31250 [Source:UniProtKB/Swiss-Prot;Acc:C0LGR9]	Y4312_ARATH	1.42e-131
TRINITY_DN10052_c0_g1_i1.p1	0	0	0	0	0	0	0.46	2.06	1.45	0.69	0	0.78	0	0.39	0.87	1.35	0	0	0.4	0	0
TRINITY_DN10053_c0_g1_i2.p1	1.88	2.61	3.24	1.7	3.2	0	2.99	2.21	1.55	2.21	1.06	3.74	3.56	2.94	5.12	1.94	2.78	3.82	1.71	2.73	0.4	AT1G63330.3	2.97e-42	Pentatricopeptide repeat-containing protein At1g63330 [Source:UniProtKB/Swiss-Prot;Acc:Q9C8T7]	PP101_ARATH	2.92e-41
TRINITY_DN100541_c0_g1_i1.p1	0	0	0	0	0	0	0.38	0	0	0	0.4	0	0	0.64	0	0	0.35	0	0	0	0	AT3G03680.1	3.57e-12		QKY_ARATH	8.67e-08
TRINITY_DN10054_c1_g1_i2.p1	3.45	2.3	2.72	2.31	2.61	2.34	3.07	1.34	4.07	2.82	2.06	2.63	3.52	2.96	0.95	1.75	2.67	2.95	3.41	4.04	1.6	AT3G26090.1	4.93e-173	Regulator of G-protein signaling 1 [Source:UniProtKB/Swiss-Prot;Acc:Q8H1F2]	RGS1_ARATH	4.85e-172
TRINITY_DN10056_c0_g1_i1.p1	8.57	10.81	8.9	6	24.94	25.59	19.38	23.86	21.98	24.79	21.42	24.18	25.94	26.14	28.2	42.53	42.52	41.73	58.24	21.94	18.43	AT5G04020.1	9.06e-28		PICBP_ARATH	8.91e-27
TRINITY_DN10057_c0_g1_i1.p1	4.68	4.65	7.18	7.81	9.92	5.72	5.61	2.13	4.27	7.74	9.14	4.36	8.81	3.08	0.57	0.75	1.67	0.24	3.89	6.2	2.37	AT2G30840.2	1.69e-70		DV4H_CATRO	5.53e-74
TRINITY_DN10058_c0_g2_i1.p1	12.82	7.91	11.78	6.06	13.25	8.15	7.77	9.84	12.64	14.33	12.09	10.78	13.69	10.9	12.28	13.85	11.63	12.83	18.95	18.03	13.42	AT5G37310.2	0	Transmembrane 9 superfamily member 4 [Source:UniProtKB/Swiss-Prot;Acc:Q9FHT4]	TMN4_ARATH	0
TRINITY_DN1005_c0_g1_i1.p1	95.08	97.59	82.78	66.44	79.1	101.92	105.24	117.91	96.32	76.37	76.46	98.6	107.71	110.69	122.22	116.18	95.57	99.83	127.01	115.52	124.69	AT1G19310.1	3.55e-58		RNF5_CAEEL	1.06e-27
TRINITY_DN1005_c1_g4_i1.p1	8.28	6.33	13	8.8	12.35	17.32	7.77	9.61	9.67	5.71	9.93	10.73	15.87	6.97	36.59	19.15	20.67	21.13	24.33	24.98	22.69	AT1G19310.1	4.3e-33		RNF5_HUMAN	2.84e-17
TRINITY_DN100621_c0_g1_i1.p1	0.63	0.86	0.27	0.37	0	0.33	0	0	0.69	0	0.69	0.28	0	0	0	0	0.93	0	0.57	0	0	AT4G14860.1	5.89e-20	Transcription repressor OFP11 [Source:UniProtKB/Swiss-Prot;Acc:O23341]	OFP11_ARATH	5.8e-19
TRINITY_DN10062_c0_g2_i2.p1	11.45	11.36	22.88	16.89	18.99	16.64	18.47	19.94	12.42	25.79	21.38	16.5	17.15	11.94	21.11	14.19	16.24	20.79	22.46	23.14	16.84	AT3G02580.1	1.39e-159	Delta(7)-sterol-C5(6)-desaturase 1 [Source:UniProtKB/Swiss-Prot;Acc:Q39208]	SC5D_TOBAC	1.11e-167
TRINITY_DN10064_c0_g1_i4.p1	5.44	4.66	4.24	2.82	4.25	5.08	4.59	5.16	6.19	5.14	5.06	5.19	7.12	6.14	7.64	7.52	6.28	6.43	9	3.63	3.42	AT1G08060.3	3.09e-65	Helicase protein MOM1 [Source:UniProtKB/Swiss-Prot;Acc:Q9M658]	MOM1_ARATH	3.54e-63
TRINITY_DN100664_c0_g1_i1.p1	0.12	0	0	0	0	0	0	0	0	0	0	0.11	0	0	0.12	0.12	0.47	0.32	0.97	0.11	0.32	AT1G61590.1	0		PBL15_ARATH	0
TRINITY_DN10066_c0_g2_i3.p1	0.45	1.83	1.72	1.52	1.88	1.25	2.25	4.28	2.64	1.73	1.61	2.23	3.85	2	5.63	3.72	3.39	3.23	2.1	6.03	4.83
TRINITY_DN10066_c0_g3_i1.p1	0	0	0	0	0.64	0	0.45	0.2	0	0.18	0	0	0	0	0.89	0.22	0.22	0	0	0.21	0
TRINITY_DN10066_c0_g4_i1.p1	0.64	0	0	0	0.21	0	0	0	0	0.52	0	0.78	0	0.37	0	0.43	0	0.19	0.19	0.21	0
TRINITY_DN100677_c1_g3_i1.p1	0.59	0.55	0	0	0	0	0	0	0	0	0	0	1.29	0	0	0	0	0	0	0	0
TRINITY_DN100677_c2_g1_i1.p1	0	0.33	0	0	0	0	0	0	0	0	0	0	0	0	0	0	0	0	0	0	0
TRINITY_DN10067_c0_g2_i3.p1	1.63	2.62	1.41	3.41	1.19	5.21	0.86	0.76	1.34	2.25	1.81	2.91	0.44	3.61	2.43	3.34	4.42	4.06	1.48	1.18	1.05	AT4G06598.1	2.53e-15	Uncharacterized protein At4g06598 [Source:UniProtKB/Swiss-Prot;Acc:Q8W3M7]	Y4598_ARATH	2.49e-14
TRINITY_DN1006_c0_g1_i1.p1	12.48	12.29	10.54	8.62	14.99	26.53	17.92	30.91	23.86	15.18	10.26	23.89	42.47	33.84	65.74	39.24	35.48	27.83	63.61	42.79	42.64	AT1G71240.1	0
TRINITY_DN1006_c0_g1_i3.p1	7.08	4.42	4.73	2.63	6.5	4.45	3.44	6.8	4.88	9.52	5.41	7.43	6.79	6.24	7.47	9.91	7.58	10.39	10.35	8.71	7.02	AT5G20660.3	4.5e-86
TRINITY_DN1006_c0_g1_i3.p2	11.11	12.31	13.38	14.6	16.71	18.28	13.32	17.68	17.72	16.15	16.91	18.1	14.85	16.43	24.61	24.4	25.66	22.5	29.97	26.47	24.91	AT5G20660.4	2.8e-75
TRINITY_DN1006_c0_g1_i3.p3	42.44	35.65	32.45	29.9	43.07	44.44	48.7	64.78	40.72	33.13	36.87	25.59	38.97	25.81	23.18	50.78	32.58	37.11	49.93	26.77	23.85	ATCG00680.1	1.24e-150	Photosystem II CP47 reaction center protein [Source:UniProtKB/Swiss-Prot;Acc:P56777]	PSBB_GOSHI	1.42e-151
TRINITY_DN1006_c0_g1_i3.p4	42.18	29.54	27.09	24.05	36.93	31.95	37.08	56.87	42.01	40.5	23.74	19.2	28.88	26.97	25.24	52.61	28.18	35.73	42.43	28.57	39.1	ATCG00720.1	9.51e-158	Cytochrome b6 [Source:UniProtKB/Swiss-Prot;Acc:P56773]	CYB6_EUCGG	5.28e-158
TRINITY_DN1006_c0_g1_i3.p5	50.03	33.32	43.03	43.79	36.9	44.45	42.68	62.68	48.86	52.94	32.88	39.15	28.53	43.98	27.8	63.11	34.68	32.69	39.64	30.39	32.69	ATCG00730.1	9.4e-111	Cytochrome b6-f complex subunit 4 [Source:UniProtKB/Swiss-Prot;Acc:P56774]	PETD_NYMAL	1.51e-110
TRINITY_DN1006_c0_g2_i1.p1	0.53	2.49	0.92	2.57	0.52	0.58	1.14	0.5	2.35	2.48	0.61	2.8	0	1.43	0	2.77	3.15	2.88	3.38	0.52	0
TRINITY_DN1006_c0_g2_i2.p1	4.36	7.96	5.33	4.76	5.64	7.69	6.09	5.42	5.97	4.9	5.2	8.48	5.42	6.41	5.8	6.3	7.16	6.26	8.91	7.74	9.41	AT2G47700.2	3.63e-42		RFI2_ARATH	6.63e-41
TRINITY_DN1006_c1_g1_i1.p1	1.77	4.08	3.88	2.69	4.3	4.58	3.86	6.98	5.73	3.76	3.97	7.43	7.79	6.3	17.31	8.88	8.67	11.12	19.8	14.18	12.74	AT5G11730.1	0		BC10_ORYSJ	1.16e-45
TRINITY_DN100707_c0_g1_i1.p1	0.25	0	0	0.15	0	0.26	0.76	0.34	0	0	0.26	0	0.13	0	0.38	0.5	0.58	0	0.45	0	0	AT4G23160.2	8.89e-47		POLR1_ARATH	4.2e-67
TRINITY_DN10072_c0_g1_i13.p4	0.46	0.68	0.8	0.72	0.15	0.16	0.31	0.14	1.33	0.75	0.65	0.85	0.32	0.53	0.78	1.07	0.3	0.28	0.56	0.45	0	AT1G40390.1	2.24e-09
TRINITY_DN10072_c0_g1_i14.p2	0.2	0.53	0.35	0	0.58	0.62	0.1	0.46	0.76	0.16	0.52	0.09	0.62	0.95	0.1	0.4	0	0.37	0.55	0.2	0.09	AT1G43760.1	2.02e-23		LORF2_HUMAN	4.59e-43
TRINITY_DN10072_c0_g1_i16.p1	0.26	0.08	0.23	0.3	0.42	0.71	0.09	1.03	0.75	0.64	0.45	0.65	0.97	0.74	0.97	0.51	0.17	0.16	1.5	0.34	0.7	AT2G01050.1	1.4e-44
TRINITY_DN10073_c0_g1_i4.p1	3.1	2.37	0.76	3.63	3.84	4.12	4.32	3.47	0.48	1.43	2.12	3.24	2.3	5.18	0.89	0.66	0.43	2.41	3.01	0	0.78
TRINITY_DN100754_c0_g1_i4.p1	0.31	0.85	0.54	0	0.3	0	0	0.58	0.68	0	0	0.85	0.33	0.27	1.56	0	0.92	1.42	0.57	0.91	0.27	AT1G35490.1	2.07e-11		Y4598_ARATH	1.46e-07
TRINITY_DN100754_c0_g2_i1.p1	1.42	1.19	1.04	0.59	1.74	1.44	1.32	1.09	1.59	1.64	1.23	2.14	1.09	2.47	1.56	2.57	2.79	2.33	3.45	1.43	2.01	AT4G27510.1	9.7e-55
TRINITY_DN100768_c0_g1_i1.p1	0.83	0	0	0	0	0	0	0	0	0	0	0	0.45	0	0	0.43	0	0	0	0	0	AT2G26690.3	9.48e-71	Protein NRT1/ PTR FAMILY 6.2 [Source:UniProtKB/Swiss-Prot;Acc:Q9SZY4]	PTR27_ARATH	1.6e-69
TRINITY_DN10078_c0_g1_i2.p1	8.87	12.34	12.41	6.68	7.31	8.79	7.85	12.82	14.7	11.39	10.4	9.38	6.9	11.14	12.51	17.77	16.05	14.54	16.16	14.11	12.96	AT4G32600.2	3.54e-130		RING4_ARATH	2.26e-28
TRINITY_DN10079_c0_g1_i1.p1	21.3	21.77	29.89	20.11	25.51	37.96	24.1	32.89	39	32.45	26.37	31.15	35.77	30.01	36.96	28.05	42.73	37.08	48.38	46.11	52.06	AT5G47960.1	6.26e-127	Ras-related protein RABA4c [Source:UniProtKB/Swiss-Prot;Acc:Q9FE79]	RLGP1_ORYSJ	2.86e-131
TRINITY_DN1007_c1_g1_i12.p1	12.17	12.19	12.15	11.38	10.84	11.1	8.32	13.98	17.84	10.45	17.78	12.13	12.51	19.38	21.43	23.35	17.33	21.48	18.58	18.26	16.96	AT3G06510.2	8.02e-21	Galactolipid galactosyltransferase SFR2, chloroplastic [Source:UniProtKB/Swiss-Prot;Acc:Q93Y07]	SFR2_ORYSJ	2.64e-33
TRINITY_DN10080_c0_g2_i1.p1	3.16	9.8	11.52	7.42	5.85	1.51	4	4.49	15.05	7.21	4.93	4.21	3.29	5.06	7.07	7.55	8.11	6.61	3.3	5.63	4.05	AT3G25950.1	1.87e-78		Y5285_ARATH	4.11e-77
TRINITY_DN10081_c0_g1_i1.p1	15.31	14.59	18.38	12.31	13.86	13.57	12.53	21.31	22.62	22.82	20.38	19.87	21.36	20.27	29.19	24.14	26.48	25.16	35.91	24.04	23.05	AT2G13540.1	0	Nuclear cap-binding protein subunit 1 [Source:UniProtKB/Swiss-Prot;Acc:Q9SIU2]	NCBP1_ARATH	0
TRINITY_DN10082_c0_g1_i2.p2	0	0	0	0	0	0.66	0.33	0	0	0	0	0.28	0	0.28	0	0	0.31	0	0	0	0.82	AT3G47680.1	4.4e-14		GSTT3_ARATH	1.44e-12
TRINITY_DN10082_c0_g1_i4.p1	1.94	2.38	1.81	2.26	1.72	1.84	0.91	1.65	2.59	2.43	3.13	2.35	2.92	2.44	2.57	2.22	1.61	2.58	1.49	1.3	2	AT2G13770.1	1e-31
TRINITY_DN100839_c0_g1_i2.p1	0.31	0	0	0	0	0	0	0	0.34	0	0	0.28	0	0	0	0.32	0	0	0	0	0	AT5G20190.1	1.3e-30
TRINITY_DN10083_c0_g1_i2.p1	3.66	2.56	3.16	3.66	5.08	5.14	3.19	1.16	2.86	1.03	1.05	2.81	4.13	4.33	0.38	1	0.74	0.23	0.8	0.49	2.14	AT5G14090.1	1.16e-27	Protein LAZY 1 [Source:UniProtKB/Swiss-Prot;Acc:Q5XV40]	LAZY1_ARATH	1.14e-26
TRINITY_DN10085_c0_g1_i3.p1	2.58	1.53	1.93	1	1.65	0.53	1.05	2.69	1.68	0.56	0.54	1.74	2.84	0.89	2.25	2.39	1.35	3.59	2.49	0	1.07
TRINITY_DN10085_c1_g1_i1.p1	19.21	15.86	19.06	17.95	17.71	24.25	17.17	18.84	20.4	32.15	32.93	24.56	27.95	20.88	33.32	22.03	22.89	28.4	37.21	39.7	49.68	AT5G64670.1	1.56e-99		RL15_GLUDA	3.19e-26
TRINITY_DN100879_c0_g1_i1.p1	0	0	0	0	0.25	0	0	0	0	0	0	0	0	0.23	0	0	0	0	0	0	0	AT3G07700.1	3.69e-129		AB1K7_ARATH	3.63e-128
TRINITY_DN100889_c1_g1_i1.p1	0	0.59	0	0	0	0	1.35	0	0	0	0	0	0	0	0	0	0	0	0	0	0				POLR1_ARATH	3.6e-14
TRINITY_DN100899_c0_g1_i3.p1	0.94	0	0	0.57	0	0.51	0.5	0.44	0.52	0	0	0	0	0	0	0.97	0	0	0	0	0	AT1G24090.1	2.14e-06		Y2253_MYCBO	5.52e-10
TRINITY_DN1008_c0_g1_i1.p1	32.93	30.3	26.26	16.96	25.91	26.56	27.89	38.17	41.58	34.69	32.45	32.61	41.82	41.21	50.49	49.85	46.64	42.2	55.94	35.14	32.73	AT2G20580.1	0	26S proteasome non-ATPase regulatory subunit 2 homolog A [Source:UniProtKB/Swiss-Prot;Acc:Q9SIV2]	PSD2A_ARATH	0
TRINITY_DN100900_c0_g1_i1.p1	0	0	0	0	0	0	0	0	0	0	0.21	0	0	0	0	0	0.19	0	0	0	0	AT5G21930.4	5.7e-64	Copper-transporting ATPase PAA2, chloroplastic [Source:UniProtKB/Swiss-Prot;Acc:B9DFX7]	HMA8_ARATH	6.17e-63
TRINITY_DN100900_c0_g2_i1.p2	0	0	0	0	0	0	0	0	0	0	0	0	0	0	0	0	0	0	0	0	0	AT5G21930.4	6.11e-66	Copper-transporting ATPase PAA2, chloroplastic [Source:UniProtKB/Swiss-Prot;Acc:B9DFX7]	HMA8_ARATH	7.08e-64
TRINITY_DN10091_c0_g1_i1.p1	7.27	6.74	4.95	3.99	5.95	5.52	5.16	6.35	5.68	8.5	6.28	6.23	7.16	4.8	3.22	5.13	5.67	7.42	7.06	3.9	3.48	AT5G18410.2	0	Protein PIR [Source:UniProtKB/Swiss-Prot;Acc:Q5S2C3]	PIR_ARATH	0
TRINITY_DN100920_c2_g1_i1.p1	0	0.21	0.21	0	0	0	0	0.22	0	0	0	0.22	0	0	0	0	0	0	0	0	0	AT5G11300.1	2.42e-127	Cyclin-A2-2 [Source:UniProtKB/Swiss-Prot;Acc:Q147G5]	CCA22_ARATH	2.38e-126
TRINITY_DN100923_c0_g1_i1.p1	0	0	0	0	0	0	0	0	0	0	0	0	0	0	1.22	0	0	0	0	0	0	AT4G18430.1	1.82e-70	Ras-related protein RABA1e [Source:UniProtKB/Swiss-Prot;Acc:O49513]	RB11B_RAT	4.84e-76
TRINITY_DN10093_c0_g1_i8.p1	0.64	0.29	1.93	0.76	1.86	0.67	0.33	0.3	0.35	2.04	2.44	3.18	1.69	0	0.32	0.65	3.47	3.77	3.77	1.55	0.83
TRINITY_DN10095_c0_g1_i2.p1	45.41	46.21	73.63	49.52	35.69	31.51	24.47	56.82	79.18	86.61	111.37	60.97	61.18	56.01	105.25	97.77	106.36	82.12	98.51	73.43	67.7	AT5G09590.1	0	Heat shock 70 kDa protein 10, mitochondrial [Source:UniProtKB/Swiss-Prot;Acc:Q9LDZ0]	HSP7M_PHAVU	0
TRINITY_DN10095_c0_g3_i2.p1	12.76	14.38	12.75	10.54	11.99	9.15	8.78	18.18	14.68	19.07	27.12	18.14	17.46	10.49	17.93	11.84	13.6	15.29	16.71	11.79	11.93	AT5G09590.1	0	Heat shock 70 kDa protein 10, mitochondrial [Source:UniProtKB/Swiss-Prot;Acc:Q9LDZ0]	HSP7M_PHAVU	0
TRINITY_DN100988_c0_g1_i1.p1	0	0	0	0	0	0	0	0	0	0	0	0	0	0	0	0	0	0	0.29	0	0.84	AT3G13235.3	6.53e-15		DDI1_PHANO	6.42e-65
TRINITY_DN10098_c0_g1_i2.p1	4.38	3.74	4.73	3.64	4.87	7.04	5.28	5.22	5.88	6.3	4.17	6.8	7.18	7.34	9.59	7.37	6.85	8.89	13.59	11.34	9.81	AT3G48195.1	0		PKHM3_MOUSE	1.28e-33
TRINITY_DN10099_c0_g1_i1.p1	10.5	10.16	10.77	6.55	6.68	8.57	10.89	13.46	15.16	10.53	7.91	10.19	13.87	16.29	20.79	20.15	14.06	13.48	14.28	12.91	12.66	AT5G65110.1	0	Acyl-coenzyme A oxidase 2, peroxisomal [Source:UniProtKB/Swiss-Prot;Acc:O65201]	ACOX2_ARATH	0
TRINITY_DN1009_c0_g1_i5.p1	36.93	40.99	37.81	34.85	65.39	67.64	58.02	93.05	65.78	41.95	49.95	92.8	94.34	84.42	133.1	149.94	105.79	102.94	146.49	87.69	106.15	AT2G33580.1	8.53e-65	Protein LYK5 [Source:UniProtKB/Swiss-Prot;Acc:O22808]	LYK5_ARATH	8.39e-64
TRINITY_DN1009_c0_g1_i8.p1	3.93	4	4.97	3.38	4.04	5.39	5.78	7.33	6.31	5.29	5.35	5.44	7	7.79	10.78	7.88	8.56	7.58	10.77	6.4	5.94	AT5G62760.3	9.37e-130		YLPM1_RAT	2.24e-54
TRINITY_DN1009_c1_g1_i1.p1	11.91	13.85	15.32	12.01	13.01	14.53	11.73	13.94	16.32	15.64	13.2	13.21	15.41	15.61	17.84	19.51	19.41	19.13	19.97	15.91	20.93	AT5G63610.1	0	Cyclin-dependent kinase E-1 [Source:UniProtKB/Swiss-Prot;Acc:Q84TI6]	CDKE1_ARATH	0
TRINITY_DN1009_c3_g1_i1.p1	0.35	0.95	0.6	0.83	0.67	1.47	2.54	2.91	1.52	0.28	0	1.56	2.21	1.53	1.04	0	0.34	1.89	0.95	0.34	0	AT1G21280.1	3.26e-12		POLR1_ARATH	3.3e-07
TRINITY_DN100_c0_g1_i1.p1	0	0	0	0.66	0.53	0	0	1.03	0.61	0	0	0	0	0	0	0.57	0	0.49	0	0	0.46
TRINITY_DN100_c0_g1_i6.p1	102.2	97.91	111.36	84.73	97.07	104.43	113.13	161.95	189.28	169.73	179.82	161.67	171.63	166.9	150.28	152.89	148.28	137.06	153.75	153.19	122.33
TRINITY_DN100_c0_g1_i7.p1	10.55	8.05	15.26	11.69	11.76	7.47	13.16	15.61	4.76	8.45	12.68	16.52	8.88	10.22	29.44	23.13	18.67	25.14	35.99	51.97	36.73
TRINITY_DN100_c0_g1_i8.p1	46.75	49.3	48.66	39.78	50.58	51.21	43.55	62.4	68.67	76.16	67.05	63.43	71.08	68	68.96	69.6	57.48	67.42	63.26	71.86	61.08
TRINITY_DN100_c0_g2_i1.p1	42.61	41.37	33.86	29.39	50.58	32.79	47.91	47.28	50.72	51.51	43.26	68.22	50.8	48	69.07	60.08	71.35	74.52	59.76	53.76	77.07
TRINITY_DN10101_c0_g1_i1.p1	0.54	0.4	1.4	1.07	0.96	0.78	1.39	2.32	0.74	1.13	1.58	1.08	2.57	1.05	2.1	2.79	2.18	1.82	3.13	1.04	0.83	AT4G29950.3	7.36e-160		TBCD5_HUMAN	4.56e-31
TRINITY_DN10102_c1_g1_i1.p1	1.1	1.74	0.24	0.65	1.07	0.29	0.57	1.28	1.2	0.88	0.3	1	0.87	0.48	0.55	2.5	2.72	3.51	3	0.53	0.97	AT1G24090.1	5.71e-07		RNH_SULTO	4.39e-06
TRINITY_DN10103_c0_g1_i1.p1	0.78	1.57	1.93	0.95	3	1.23	0.82	2.86	0	1.5	1.73	3.92	1.65	0	0.97	2.98	2.14	2.31	0.55	1.22	1.18	AT3G02860.1	3.17e-40		ARS1_ARATH	4.46e-39
TRINITY_DN10103_c0_g1_i6.p1	6.59	5.83	8.43	7.62	8.66	7.8	7.34	9.48	12.68	9.42	9.66	11.08	12.08	10.58	14.73	11.91	14.37	10.66	18.27	17.94	15.63	AT2G25180.1	3.54e-123	Two-component response regulator ARR12 [Source:UniProtKB/Swiss-Prot;Acc:P62598]	ORR23_ORYSI	1.86e-124
TRINITY_DN10103_c0_g1_i7.p1	4.1	3.29	4.4	4.25	4.74	4.35	3.86	4.54	11.2	6	6.02	5.13	6.24	6.65	9.28	7.87	10.47	11.39	12.74	9.67	12.47	AT3G02860.2	1.77e-75		ARS1_ARATH	1.74e-74
TRINITY_DN10104_c0_g1_i13.p1	6.46	5.98	4.82	2.05	5.92	4.96	5.67	6.07	6.51	6.2	4.3	4.34	8.14	7.07	4.75	5.97	6.2	5.87	5.45	6.38	6.28
TRINITY_DN101056_c0_g1_i1.p1	1.25	0	0.53	0	0	0	0	0	0	0	0	0	0	0	0.61	0	0	0	0	0	0	AT3G01410.1	1.43e-09		Y2253_MYCBO	1.21e-10
TRINITY_DN10105_c0_g1_i5.p1	0.46	0.28	0	0.41	0.52	0.41	1.34	0.54	0.27	0.02	1.47	1.02	0	0	1.67	0.72	0	2.14	9.8	4.53	2.6	AT3G20810.5	2.45e-74	Lysine-specific demethylase JMJ30 [Source:UniProtKB/Swiss-Prot;Acc:Q8RWR1]	JMJ30_ARATH	2.57e-73
TRINITY_DN10105_c0_g1_i7.p1	2.21	0.88	0.11	3.69	5.67	3.08	1.14	0.43	0	1.36	7.31	7.11	2.24	1.99	8.64	2.56	2.15	13.3	32	20.3	12.8	AT3G20810.2	0	Lysine-specific demethylase JMJ30 [Source:UniProtKB/Swiss-Prot;Acc:Q8RWR1]	JMJ30_ARATH	0
TRINITY_DN10105_c0_g4_i1.p1	359.74	348.05	366.32	282.97	366.67	335.04	336.72	297.31	237.93	294.98	287.81	295.88	270.21	272.84	282.48	247.08	249.34	288.66	281.87	295.13	268.9	AT2G20890.1	1.35e-94	Protein THYLAKOID FORMATION 1, chloroplastic [Source:UniProtKB/Swiss-Prot;Acc:Q9SKT0]	THF1_ARATH	1.33e-93
TRINITY_DN101075_c0_g1_i1.p1	0	0	0	0	0	0	0	0	0	0	0	0	0	0	0	0	0	0	0	0	0	AT3G13410.1	1.77e-39
TRINITY_DN10107_c0_g1_i1.p1	23.03	21.22	37.04	20.31	59.16	64.55	50.46	76.46	76.93	31.75	28.19	83.3	106.64	95.74	105.56	81.25	73.25	88.05	154.57	123.56	139.43	AT4G14830.1	5.27e-31
TRINITY_DN10108_c0_g1_i7.p1	2.54	1.57	2.12	1.2	2.53	2.2	2.47	3.1	3.15	1.92	2.43	3.68	3.54	1.93	3.91	4.17	3.32	3.94	5.79	4.73	2.96	AT4G22860.1	3.25e-103		TPX2_ARATH	1.31e-33
TRINITY_DN101096_c0_g1_i1.p1	0	0	0	0	0	0	0	0	0.2	0.45	0	0.17	0	0	0	0	0	0	1.54	0.36	0.82
TRINITY_DN10109_c0_g2_i1.p1	4.56	3.39	7.44	1.88	9.64	13.32	9.55	16.36	13.91	4.2	5.09	16.98	21.56	17.32	20.54	16.99	10.43	18.66	34.25	21.58	26.53	AT5G39660.3	4.46e-59	Cyclic dof factor 2 [Source:UniProtKB/Swiss-Prot;Acc:Q93ZL5]	CDF2_ARATH	4.39e-58
TRINITY_DN10109_c1_g1_i2.p1	9.44	8.23	2.92	3.54	8.05	6.77	6.73	3.44	1.16	7.49	9.01	5.57	5.14	4	4.13	4.96	5.6	6.96	5.16	4.99	4.11	AT4G24060.1	1.91e-37	Dof zinc finger protein DOF4.6 [Source:UniProtKB/Swiss-Prot;Acc:Q8LAP8]	DOF46_ARATH	1.88e-36
TRINITY_DN1010_c0_g1_i10.p2	0.13	0.11	0.63	1.6	1.92	0.67	0.91	0.7	3.17	0.63	0.69	0.53	0.16	0.63	1.22	0.85	1.37	0.83	1.99	0.27	0.97
TRINITY_DN1010_c0_g1_i2.p1	1.06	0.15	2.21	1.53	1.6	0.71	1.07	2.26	1.8	1.3	2.82	1.15	1.16	2.11	1.88	2.25	1.99	1.92	1.75	1.02	1.19
TRINITY_DN1010_c0_g2_i1.p1	1.36	2	2.06	3.69	2.51	1.04	1.84	3.23	1.84	3.98	3.18	1.69	2.2	2.34	4.14	2.02	2.45	1.76	1.64	1.54	2.04
TRINITY_DN1010_c0_g2_i1.p2	3.19	4.02	3.89	5.77	5.57	1.86	3.1	4.93	2.37	7.28	4.86	4.66	4.86	5.13	5.45	7.37	4.74	4.75	4.65	1.59	5.66
TRINITY_DN101100_c1_g2_i2.p1	0	0	0	0	0	1.19	0	0	0	0	0	0	0	0.49	0	0	0	0	0	0	0
TRINITY_DN101100_c3_g1_i1.p1	0.28	0.51	0	0	0	0	0	0.26	0	0	0	0	0	0.25	0	0	0	0	0	0	0
TRINITY_DN101103_c1_g1_i1.p1	0	0	0.66	0.6	0	0	0	0.71	0.28	0	0.83	0	0	0	0.26	0.26	0.76	0.47	0	0.74	0	AT4G23160.2	1.4e-51		POLR1_ARATH	1.2e-75
TRINITY_DN10110_c0_g2_i1.p1	3.74	4.32	1.89	4.05	2.6	3.94	1.7	3.31	3.06	3.67	3.76	3.7	3.03	2.1	3.39	2.17	3.29	3.63	7.12	3.49	4.96	AT1G76340.1	0	GDP-mannose transporter GONST3 [Source:UniProtKB/Swiss-Prot;Acc:Q9S845]	GONS3_ARATH	0
TRINITY_DN101131_c0_g1_i1.p1	0	0.39	0	0	0	0	0	0	0	0.33	0	0	0	0	0	0	0	0	0	0	0	AT3G26140.1	3.99e-36		GH5FP_CHAOB	4.17e-41
TRINITY_DN10113_c0_g1_i2.p1	5.73	4.15	4.95	3.37	4.36	3.87	2.94	4.57	4.7	3.42	4.13	3.98	5.46	4.51	4.15	6.98	3.92	5.71	6.91	4.39	4.99	AT2G30720.1	0		TE4_HUMLU	0
TRINITY_DN10114_c0_g1_i2.p1	44.65	39.6	43.72	31.67	43.79	41.74	40.38	53.37	54.08	50.62	45.19	52.19	45.4	52.59	72.75	69.47	67.05	75.83	80.72	73.99	75.84	AT2G47970.1	0	NPL4-like protein 2 [Source:UniProtKB/Swiss-Prot;Acc:O82264]	NPL42_ARATH	0
TRINITY_DN101171_c1_g1_i1.p1	0	1.09	0	0	0	0.42	0	0	0	0.31	0	0.35	0	0.7	0	0	0	0	0	0	0
TRINITY_DN10117_c0_g1_i1.p1	0.66	2.1	4.28	2.35	2.24	1.04	1.38	1.23	1.08	3.94	4.69	4.47	2.1	1.16	2.64	2.35	5.21	4.5	6.6	1.6	3.44	AT2G26970.1	2.11e-97	Oligoribonuclease [Source:UniProtKB/Swiss-Prot;Acc:Q9ZVE0]	ORN_ARATH	2.08e-96
TRINITY_DN10117_c0_g1_i5.p1	15.5	15.09	18.51	12.47	18.7	17.2	17.05	22.46	24.18	19.88	23.29	24.45	24.03	25.88	32.9	28.3	18.8	20.86	36.76	35.71	37.59	AT2G26970.2	2.22e-103	Oligoribonuclease [Source:UniProtKB/Swiss-Prot;Acc:Q9ZVE0]	ORN_ARATH	2.59e-102
TRINITY_DN10118_c0_g2_i3.p1	1.05	1.26	1.73	1.55	4.03	6.88	2.7	9.35	6.59	4.29	4.34	18.5	15.93	9.8	21.96	21.43	23.97	26.84	98.91	62.6	47.37	AT2G30490.1	0	Trans-cinnamate 4-monooxygenase [Source:UniProtKB/Swiss-Prot;Acc:P92994]	C4H2_PETHY	0
TRINITY_DN10119_c0_g1_i5.p1	4.67	5.47	4.3	3.51	5.07	6.32	4.6	3.87	3.42	3.55	5.68	3.34	4.33	3.11	1.83	3.44	3.99	2.19	2.73	1.31	1.88	AT1G22170.2	8.99e-142		GPMA1_ARATH	8.84e-141
TRINITY_DN1011_c0_g1_i13.p1	0.85	0.3	0.15	0.2	0.98	0.35	1.21	2.34	0.18	0.96	0.54	1.57	0.17	1.9	1.03	0.34	1	0.77	1.38	0.82	1.21				R1B19_SOLDE	3.08e-06
TRINITY_DN101218_c0_g1_i1.p1	0	0	0	0.4	0	0	0.35	0.63	0	0	0	0	0	0	0.34	0.34	0.33	0.31	0	0.33	0	AT2G02650.1	7.41e-06
TRINITY_DN10125_c0_g1_i1.p1	676.46	646.18	701.15	684.39	662.33	640.77	614.13	582.94	567.77	750.17	815.32	626.2	660.99	628.35	403.52	437.63	472.09	550.57	401.26	484.99	424.47	AT5G45930.1	0	Magnesium-chelatase subunit ChlI-2, chloroplastic [Source:UniProtKB/Swiss-Prot;Acc:Q5XF33]	CHLI_SOYBN	0
TRINITY_DN10128_c0_g1_i3.p1	60.2	54.1	56.22	51.79	47.45	68.76	62.36	64.48	67.56	50.87	43.31	57.95	60.2	68.98	101.47	102.91	110.39	90.36	96.41	102.25	121.02	AT5G22950.1	6.86e-94	Vacuolar protein sorting-associated protein 24 homolog 1 [Source:UniProtKB/Swiss-Prot;Acc:Q9FFB3]	VP241_ARATH	6.75e-93
TRINITY_DN10130_c0_g3_i1.p1	18.31	21.89	17.84	14.9	14.45	17.14	15.91	20.82	22.99	17.78	15.95	18.91	22.63	22.95	27.74	21.69	29.38	20.59	30.14	21.31	16.73
TRINITY_DN101310_c0_g1_i1.p1	0.33	0	0.58	0	0	0.7	0.35	0	0.36	0.53	0.36	0	0	0.59	0	0.34	0.66	0	0.3	0	0
TRINITY_DN10131_c0_g1_i2.p1	11.23	12.39	8.72	5.94	13.6	21.88	12.04	16.39	16.41	15.06	13.17	14.68	23.25	12.05	8.26	6.94	7.89	8.47	11.79	12.21	9.13	AT1G20650.1	0		PBL21_ARATH	0
TRINITY_DN10131_c0_g2_i3.p1	209.49	258.27	230.81	184.37	232.53	231.02	285.64	228.11	193.11	212.97	198.69	234.1	206.88	220.2	221.25	216.8	231.88	266.08	196.99	191.44	200.23	AT1G53670.1	4.28e-78	Peptide methionine sulfoxide reductase B1, chloroplastic [Source:UniProtKB/Swiss-Prot;Acc:Q9C8M2]	MSRB1_ARATH	4.21e-77
TRINITY_DN10132_c0_g1_i1.p1	6.11	7.83	7.6	7.09	6.99	7.19	4.77	5.01	4.28	8.05	9.89	5.38	8.74	7.53	0.76	0.21	0.32	0.49	0.39	0.41	0.29	AT2G05790.1	0		E133_ARATH	4.31e-118
TRINITY_DN10132_c0_g2_i1.p1	0.74	1.21	0.46	1.22	1.62	2.57	1.07	0.87	0.68	0.95	1.31	0.49	1.83	0.72	0.21	0.1	0.52	0.29	0.76	0.1	0.47	AT5G55180.1	0		E1313_ARATH	4.25e-119
TRINITY_DN10133_c0_g1_i11.p1	0.15	0.13	0.38	0	0.14	0.45	0.74	1.2	0.16	0.59	0.91	2.69	2.09	1.87	2.64	0.43	1	1.45	1.45	0.42	0.26	AT3G14920.1	7.04e-117		PNAA_PRUDU	3.22e-126
TRINITY_DN101356_c0_g2_i3.p1	0.16	0	0.27	0.37	0.46	0.49	0.32	0.29	0.17	0.26	0	0	0.65	0.27	0.16	0.16	0	0.14	0.14	0.61	0	AT2G22490.2	6.14e-74	Cyclin-D2-1 [Source:UniProtKB/Swiss-Prot;Acc:P42752]	CCD22_ORYSJ	4.1e-78
TRINITY_DN10136_c0_g1_i12.p1	60.54	103.88	56.67	46.42	63.05	56.15	56.49	86.67	93.09	46.3	56.75	67.04	76.54	94.17	98.04	130.43	78.4	69.78	96.11	81.01	92.44	AT5G28910.2	0
TRINITY_DN10136_c0_g1_i5.p1	1.5	9.35	0.96	3.28	2.09	0.85	1.63	2.02	1.09	2.4	1.3	1.93	0	0.23	0	4.31	0	0.89	0	0	4.89	AT5G28910.1	5.03e-53
TRINITY_DN101375_c0_g1_i1.p1	0	0	0	0	0	0	0	0	0	0	0	0	0	0	0	0	0	0.57	0	0	0	AT5G60590.1	7.58e-07		TSAC_MYCTU	3.74e-20
TRINITY_DN10137_c1_g1_i1.p1	13.53	16.17	27.16	21.82	28.27	25.64	19.7	18.67	27.38	26.07	24.11	21.05	15.92	14.22	21.58	20.3	32.32	28.3	39.29	38.97	37.17	AT3G51040.3	1.75e-72	Protein RTE1-HOMOLOG [Source:UniProtKB/Swiss-Prot;Acc:Q9SD42]	RTH_ARATH	1.72e-71
TRINITY_DN101397_c0_g1_i1.p1	0	0	0	0	0	0	0	0	0	0	0	0	0	0	0	0	0	0	0	0	0				POLR1_ARATH	2.78e-12
TRINITY_DN1013_c0_g1_i3.p1	23.63	26.56	33.26	22.77	40.66	29.12	35.58	49.09	45.31	36.23	43.75	37.77	48.95	41.86	56.28	63.42	45.96	47.09	65.88	47.45	44.19	AT1G15200.2	3.75e-46
TRINITY_DN1013_c0_g1_i3.p2	16.56	24.06	42.37	34.81	31.83	28.79	23.08	41.58	43.41	41.67	47.02	36.55	24.51	31.29	43.62	45.96	59.24	50.32	47.47	47.8	52.33	AT1G15200.1	9.9e-37
TRINITY_DN1013_c0_g1_i4.p1	27.55	27.83	22.72	32.15	36.04	42.67	35.45	46.73	38.29	28.48	29.43	33.16	46.36	39.81	55.17	49.74	42.79	38.57	47.67	49.16	49.63	AT1G15200.1	5.69e-71
TRINITY_DN1013_c0_g1_i8.p1	18.71	13.58	10.64	7.23	14	19.58	16.26	24.37	17.45	17.72	10.07	20.74	17.37	27.1	27.44	31.7	43.47	37.37	28.51	37.01	36.48	AT4G19645.4	3.78e-109		TLC4B_XENLA	6.44e-25
TRINITY_DN1013_c1_g1_i9.p1	0	0	0	0.41	0	0	0	0.32	0	0	0.38	0	0.37	0.91	2.41	0.7	0.68	1.56	1.56	0.67	0.9
TRINITY_DN101403_c0_g1_i1.p2	0	0	0	0	0	0	0	0	0	0	0	0	0	0	0	1.01	0	0	0	0	0				RIMO_METPP	6.9e-46
TRINITY_DN101410_c0_g1_i1.p1	0.26	0.47	0.11	0.15	0.13	0.27	0	0	0.43	0.11	0.69	0	0.27	0.34	0	0.13	0	0.12	0.12	0.26	0.71	AT4G38970.1	0	Fructose-bisphosphate aldolase 2, chloroplastic [Source:UniProtKB/Swiss-Prot;Acc:Q944G9]	ALFP_ORYSJ	0
TRINITY_DN101410_c0_g1_i2.p1	0.12	0.11	0	0.43	0.12	0.38	0.12	0	0.27	0.1	0.13	0	0.38	0.32	0	0.12	0.24	0.22	0.11	0.12	0.22	AT4G38970.1	0	Fructose-bisphosphate aldolase 2, chloroplastic [Source:UniProtKB/Swiss-Prot;Acc:Q944G9]	ALFP_ORYSJ	0
TRINITY_DN10141_c0_g1_i3.p1	11.64	9.66	7.17	10.02	14.83	7.98	5.72	12.7	13.94	16.78	21.28	19.94	18.29	11.94	19.69	19.34	17.56	21.94	16.15	18.25	15.13	AT5G55200.1	2.9e-79		MGE1_ARATH	2.85e-78
TRINITY_DN10141_c0_g1_i4.p1	2.29	2.76	7.18	3.18	0.73	0.72	2.83	3.41	3.92	8.03	7.16	4.73	2.87	4.35	5.84	5.04	7.42	7.76	6.05	5.99	6.32	AT4G26780.1	6.27e-76		MGE2_ARATH	6.17e-75
TRINITY_DN101420_c0_g1_i1.p1	0	0	0	0	0	0.45	0	0	0	0	0	0	0.45	0.37	0	0	0	0	0.38	0	0	AT4G23160.2	7.67e-45		POLR1_ARATH	8.51e-54
TRINITY_DN101422_c0_g1_i1.p1	0	0	0	0	0	0	0	0	0	0	0	0	0	0	0	0	0.42	0	0	0	0.36
TRINITY_DN101429_c0_g1_i1.p1	0	0	0	0	0	0	0	0	0	0	0	0	0	0	0.41	0	0	0	0	0	0.96				FLA_ARTBC	9.29e-52
TRINITY_DN10142_c0_g1_i3.p1	6.37	6.74	4.37	2.64	5.61	9.3	7.94	9.91	8.6	5.24	4.48	9.85	13.63	10.96	19.48	9.91	13.47	11.81	27.85	13.35	13.6	AT2G42010.1	0	Phospholipase D beta 1 [Source:UniProtKB/Swiss-Prot;Acc:P93733]	PLDB1_ARATH	0
TRINITY_DN10143_c0_g1_i1.p1	3.15	5.2	8.6	6.85	5.38	3.1	3.48	6.04	7.44	6.76	9.18	5.78	7.42	3.12	4.69	7.67	9.37	5.29	5.44	3.43	4.51	AT2G20710.1	1.54e-110	Pentatricopeptide repeat-containing protein At2g20710, mitochondrial [Source:UniProtKB/Swiss-Prot;Acc:Q9SKU6]	PP166_ARATH	1.51e-109
TRINITY_DN10145_c0_g2_i1.p1	56.95	49.13	57.76	47.58	45.75	38.14	43.31	46.39	47.3	54.55	70.14	63.02	63.12	57.09	63.5	62.84	56.21	57.8	63.76	47.43	67.24	AT4G36130.1	2.74e-176	60S ribosomal protein L8-3 [Source:UniProtKB/Swiss-Prot;Acc:Q42064]	RL8_SOLLC	3.15e-180
TRINITY_DN10145_c1_g1_i1.p1	1.34	0.48	0.48	0.37	1.5	0.98	0.74	1.39	0.5	0.53	0.66	1.21	1.21	0.55	0.94	0.77	0.32	0.71	0.5	0.13	0.42	AT1G27880.1	0	ATP-dependent DNA helicase Q-like 5 [Source:UniProtKB/Swiss-Prot;Acc:Q0WVW7]	RQL5_ARATH	0
TRINITY_DN10146_c1_g1_i1.p1	0	0	0	0	0	0	0	0	0.5	0	0.7	0	0	0	0	0.47	0.41	0	0.71	0.31	0	AT4G24610.1	4.84e-30
TRINITY_DN10146_c1_g1_i2.p1	0.38	1.39	0.66	0.45	0	0.81	0.4	1.42	1.92	1.2	1.26	1.02	1.63	1.01	1.52	0.61	2.52	2.41	2.27	0.37	0.66	AT4G24610.4	6.95e-44
TRINITY_DN10147_c0_g1_i3.p1	0	0	0	0	0	0	0	0	0	0	0	0	0	0	0	0	0	0	0	0	0
TRINITY_DN10148_c0_g1_i1.p1	1.04	1.29	1.01	0.25	1.74	0.4	0.13	0.36	0.42	0.58	0.95	0.24	0.27	0.67	0	0	0.38	0.59	0.35	0.25	0	AT5G54590.2	0	Calcium/calmodulin-regulated receptor-like kinase 1 [Source:UniProtKB/Swiss-Prot;Acc:Q9FIU5]	CRLK1_ARATH	0
TRINITY_DN10148_c0_g1_i2.p1	0	0.29	0	0.33	0	0	0	0	0	0.34	0	0	0	0	0	0	0	0	0	0	0	AT5G54590.2	1.47e-180	Calcium/calmodulin-regulated receptor-like kinase 1 [Source:UniProtKB/Swiss-Prot;Acc:Q9FIU5]	CRLK1_ARATH	1.45e-179
TRINITY_DN10148_c0_g2_i11.p1	3.02	2.05	3.11	1.58	2.7	1.28	1.38	2.49	4.2	3.66	2.82	3.08	4.46	2	1.78	2.01	3.25	3.54	2.99	1.22	0.44	AT5G54590.2	0	Calcium/calmodulin-regulated receptor-like kinase 1 [Source:UniProtKB/Swiss-Prot;Acc:Q9FIU5]	CRLK1_ARATH	0
TRINITY_DN10148_c1_g1_i1.p1	35.47	41.36	28.06	30.09	47.74	61.04	61.34	68.91	75.22	38.08	33.25	53.47	63.03	71.94	120.66	122.49	103.33	106.78	126.15	178.96	209.76	AT3G17980.1	3.55e-88	Protein C2-DOMAIN ABA-RELATED 4 [Source:UniProtKB/Swiss-Prot;Acc:Q9LVH4]	CAR4_ARATH	3.49e-87
TRINITY_DN10148_c2_g1_i1.p1	2.01	3.8	1.93	1.84	2.59	2.08	1.61	1.03	3.16	2.52	2.86	3.07	3.02	1.55	0.9	2.02	1.32	1.42	0.81	0.65	1.38	AT1G19100.1	1.08e-56	Protein MICRORCHIDIA 6 [Source:UniProtKB/Swiss-Prot;Acc:Q56Y74]	MORC6_ARATH	1.06e-55
TRINITY_DN101492_c0_g1_i1.p1	0	0	0	0	0	0	0	0.33	0	0	0	0	0	0	0	0	0	0	0	0	0	AT2G17200.1	6.32e-43	Ubiquitin domain-containing protein DSK2b [Source:UniProtKB/Swiss-Prot;Acc:Q9SII8]	DSK2B_ARATH	6.22e-42
TRINITY_DN1014_c0_g2_i1.p1	16.02	17.41	21.63	16.73	19.95	20.7	24.52	29.63	27.56	25.06	22.18	23.74	26.73	28.13	29.8	37.64	31.75	30.47	36.99	24.47	24	AT1G75440.1	3.96e-93	Probable ubiquitin-conjugating enzyme E2 16 [Source:UniProtKB/Swiss-Prot;Acc:Q9FWT2]	UBC16_ARATH	3.89e-92
TRINITY_DN1014_c0_g3_i1.p1	60.41	49.13	34.35	25.35	48.45	59.23	49.68	55.88	39.59	38.68	30.31	40.9	51.91	52.76	57.59	62.67	46.48	60.59	64.15	81.73	82.94	AT1G75440.1	1.43e-93	Probable ubiquitin-conjugating enzyme E2 16 [Source:UniProtKB/Swiss-Prot;Acc:Q9FWT2]	UBC16_ARATH	1.4e-92
TRINITY_DN1014_c0_g4_i1.p1	5.74	5.23	5.07	2.99	15.11	23.62	14.91	29.77	23.92	9.5	6.67	26.16	33.55	29.44	54.28	36.08	23.51	42.51	91.01	55.09	69.05	AT3G59080.1	0		APF2_ARATH	8.06e-71
TRINITY_DN10151_c1_g1_i1.p1	0	0	0	0	0	0	0	0	0	0	0	0	0	0	0	0	0	0	0	0	0	AT1G68590.1	1.86e-45	30S ribosomal protein 3-1, chloroplastic [Source:UniProtKB/Swiss-Prot;Acc:Q9SX22]	RRP3_HORVU	5.14e-64
TRINITY_DN101525_c0_g1_i3.p1	7.78	3.29	1.85	3.87	3.93	6.41	4.77	3.05	1.9	2.2	2.88	2.14	2.41	3.7	0.78	1.16	0.76	0.35	0.53	0.19	1.55	AT1G33800.1	4.37e-120	Glucuronoxylan 4-O-methyltransferase 3 [Source:UniProtKB/Swiss-Prot;Acc:Q9LQ32]	GXM3_ARATH	4.3e-119
TRINITY_DN101544_c0_g1_i1.p1	0	0	0	0	0	0	0	0	0	0	0	0	0	0	0	0.56	0.53	0	0	0	0	AT1G24430.1	6.63e-12		AT1_PAPSO	7.03e-10
TRINITY_DN101545_c0_g1_i1.p1	0.21	0.77	0.18	0.25	0	0.22	0	0.2	0.47	0	0	0.2	0.22	0	0	0	0	0	0.19	0	0	AT1G52080.1	1.58e-49		CHUP1_ARATH	6.1e-35
TRINITY_DN101573_c0_g1_i1.p1	4.13	1.44	1.37	0	1.23	0.67	0.99	0.59	0.69	0.76	1.04	0.57	0.34	0.28	0.32	0.96	0.63	0.58	0	0	0	AT5G51120.3	1.46e-48	Polyadenylate-binding protein 1 [Source:UniProtKB/Swiss-Prot;Acc:Q93VI4]	PABN1_ARATH	3.03e-47
TRINITY_DN101574_c1_g1_i1.p1	0	0	0	1.25	0	0	0	0	0.57	0	1.18	0	0	0.47	1.02	1.08	2.05	0.94	1.41	0	0.87
TRINITY_DN1015_c0_g1_i2.p1	26.33	23.52	21.75	11.06	16.58	18.56	22.74	26.72	26.14	27.97	27.25	28.93	30.5	26.51	25.7	27.98	28.14	33.47	34.37	24.75	24.54	AT2G21520.3	0	Phosphatidylinositol/phosphatidylcholine transfer protein SFH8 [Source:UniProtKB/Swiss-Prot;Acc:F4IHJ0]	SFH8_ARATH	0
TRINITY_DN1015_c0_g2_i1.p1	32.16	30.9	26.09	16.57	22.27	25.81	36.88	43.94	40.98	21.23	22.33	21.31	36.28	42.13	40.77	39.74	31.42	21.9	26.4	28.33	27.91	AT1G31930.4	0	Extra-large guanine nucleotide-binding protein 3 [Source:UniProtKB/Swiss-Prot;Acc:Q9C516]	XLG3_ARATH	0
TRINITY_DN1015_c0_g2_i2.p1	15.66	9.71	13.58	12.17	17.07	18.55	17.53	13.5	21.86	17.13	17.04	26.14	26.44	23.68	25.81	27.75	41.57	30.78	39.26	31.23	20.58	AT1G31930.4	3.17e-73	Extra-large guanine nucleotide-binding protein 3 [Source:UniProtKB/Swiss-Prot;Acc:Q9C516]	XLG3_ARATH	3.12e-72
TRINITY_DN1015_c3_g1_i1.p1	5.57	2.82	3.34	2.22	5.3	4.9	4.8	5.44	3.82	4.19	3.79	4.13	7.17	6.25	6.03	4.34	4.91	4.83	5.96	4.86	3.31	AT4G04970.1	0	Callose synthase 11 [Source:UniProtKB/Swiss-Prot;Acc:Q9S9U0]	CALSB_ARATH	0
TRINITY_DN101619_c0_g1_i4.p1	0.64	0.14	0	0.19	0	0	0.16	0.29	0.17	0.13	0.33	0.73	0.49	0.14	0.32	0.47	0.16	0.58	0	0	0.71	AT2G28510.1	1.33e-37	Dof zinc finger protein DOF2.1 [Source:UniProtKB/Swiss-Prot;Acc:Q8LE43]	DOF21_ARATH	1.31e-36
TRINITY_DN101620_c0_g1_i1.p1	0	0	0.5	0	0	0	0	0	0	0	0	0	0	0	0	0	0	0	0	0	0	AT4G22120.3	1.74e-77	Calcium permeable stress-gated cation channel 1 [Source:UniProtKB/Swiss-Prot;Acc:Q5XEZ5]	CSC1_ARATH	1.72e-76
TRINITY_DN101622_c0_g1_i1.p1	0.15	0	0	0.18	0	0	0	0.14	0	0	0.16	0	0.16	0	0.15	0	0	0	0	0	0.54	AT3G08590.2	0	Probable 2,3-bisphosphoglycerate-independent phosphoglycerate mutase 2 [Source:UniProtKB/Swiss-Prot;Acc:Q9M9K1]	PMGI_MAIZE	0
TRINITY_DN101622_c0_g2_i1.p1	0	0	0	0	0.33	0	0	0	0	0	0	0	0	0	0	0	0	0	0	0	0.29	AT1G09780.1	1.35e-131	2,3-bisphosphoglycerate-independent phosphoglycerate mutase 1 [Source:UniProtKB/Swiss-Prot;Acc:O04499]	PMGI_MESCR	6.04e-135
TRINITY_DN101626_c1_g1_i1.p1	0	0	0	0	0	0	0	0.53	0	0	0	0	0	0.5	0	0	0	0	0.26	0	0.25				POL_MLVFP	1.21e-21
TRINITY_DN10162_c0_g1_i2.p1	1.79	0.33	0.92	5.52	3.12	2.64	2.24	2	1.17	2.55	1.18	1.6	1.14	3.46	0.36	0.73	1.76	1.29	1.3	1.04	1.23
TRINITY_DN10162_c0_g1_i5.p1	127.08	117.44	111.44	112.42	97.56	105.17	108.89	136.04	105.09	123.01	108.84	115.86	99.21	116.93	92.8	102.97	114.43	130.96	84.77	125.26	115.45	AT4G28025.1	2.05e-38
TRINITY_DN10163_c0_g1_i5.p1	4.26	1.51	2.65	2.99	3.28	1.93	2.26	2.82	3.14	2.62	2.15	3.14	0.7	1.62	1.55	4.07	3.18	2.94	3.24	2.14	4.09	AT1G54650.1	5.3e-124		METL6_HUMAN	1.69e-44
TRINITY_DN101640_c1_g1_i1.p1	0	0	0	0	0	0	0	1.14	0.67	0.47	0	0	0	0	0	0	0	0	0.55	0	0	ATMG00710.1	2.06e-06	Uncharacterized mitochondrial protein AtMg00710 [Source:UniProtKB/Swiss-Prot;Acc:P92512]	POLX_TOBAC	2.1e-26
TRINITY_DN101643_c0_g1_i1.p1	0.43	0	0	0	0.42	0	0	0	0	0	0	0	0	0	0	0	0	0	0	0	0	AT4G23160.2	1.16e-41		POLR1_ARATH	2.41e-32
TRINITY_DN10164_c0_g1_i1.p1	18.59	5.13	4.82	2.05	6.61	23.52	41.62	30.2	10.11	5.36	5.94	6.77	33.3	33.13	43.98	6.01	3.56	3.46	8.97	27.18	27.72	AT5G18670.1	5.81e-180	Inactive beta-amylase 9 [Source:UniProtKB/Swiss-Prot;Acc:Q8VYW2]	BAM9_ARATH	5.72e-179
TRINITY_DN101672_c0_g1_i1.p1	0	0	0	0	0	0	0	0	0	0	0	0	0	0	0.58	0	0	0	0	0	0
TRINITY_DN10167_c0_g1_i1.p1	14.76	12.22	15.54	10.68	11.32	10.31	9.76	10.08	10.96	20.18	14.76	11.71	12.25	9.86	12.48	16.04	19.65	19.58	14.02	8.01	4.59	AT4G31850.1	0	Pentatricopeptide repeat-containing protein At4g31850, chloroplastic [Source:UniProtKB/Swiss-Prot;Acc:Q9SZ52]	PP344_ARATH	0
TRINITY_DN10168_c3_g1_i3.p1	17.76	18.97	18.79	11.99	19.05	16.44	14.44	17.98	19.05	18.35	18.84	18.74	18.49	17.37	19.03	21.42	20.78	23.31	22.35	20.39	17.46	AT3G47000.1	0		BGH3B_BACO1	3.93e-90
TRINITY_DN101697_c0_g1_i2.p1	0.82	0.72	0.62	0.71	0.59	0.67	0.31	1.08	0.83	1.65	1.95	1.11	0.99	1.18	0.73	0.76	1.61	1.45	1.95	0.94	0.93	AT2G47300.2	0		POP1_ARATH	0
TRINITY_DN10169_c0_g1_i1.p1	36.6	33.85	39.03	35.93	35.19	35.6	38.03	46.72	40.85	44.4	42.17	43.3	42.04	40.85	74.06	60.37	61.33	67.71	82.63	80.85	90.04	AT5G19680.1	1.62e-163		PP1R7_ARATH	1.59e-162
TRINITY_DN10169_c0_g1_i4.p2	0.69	3.17	2.02	3.22	7.05	3.67	5.58	4.81	6.08	8.9	9.37	4.74	5.46	3.97	12.33	4.3	9.2	11.47	9.93	7.76	12.18	AT5G19680.1	3.87e-26		PP1R7_ARATH	3.81e-25
TRINITY_DN1016_c1_g1_i1.p1	7.77	9.31	9.65	6.05	7.81	7.4	9.54	11.54	14.42	7.62	7.37	10	9.53	14.12	13.75	14.82	14.87	12.75	15.04	12.12	11.73	AT3G49590.1	1.36e-118	Autophagy-related protein 13a [Source:UniProtKB/Swiss-Prot;Acc:Q9SCK0]	AT13A_ARATH	1.34e-117
TRINITY_DN10170_c0_g1_i1.p1	9.35	9.58	11.72	8.14	10.43	10.47	7.1	12.96	15.01	14	13	13.03	11.82	13.03	16.92	13.85	14.79	15.63	15.13	13.77	14.03	AT1G76050.2	1.42e-165	RNA pseudouridine synthase 2, chloroplastic [Source:UniProtKB/Swiss-Prot;Acc:Q3ECD0]	PUS2_ARATH	1.4e-164
TRINITY_DN10171_c0_g1_i1.p1	15.84	16.85	11.9	12.55	13.55	14	17.06	21.38	23.54	15.75	22.68	17.86	23.77	23.56	32.49	26.66	28.98	23.58	39.29	21.43	22.55	AT4G26630.1	5.98e-59		DEKP3_ARATH	5.88e-58
TRINITY_DN10171_c0_g1_i2.p2	22.64	25.57	19.64	27.73	20.79	19.69	27.04	28.3	35.92	25.24	29.53	28.54	33.89	31.79	38.32	34.24	37.1	37.84	38.88	26.55	30.04	AT4G26630.1	1.06e-18		DEKP3_ARATH	1.04e-17
TRINITY_DN10171_c0_g3_i3.p1	6.51	12.65	6.63	7.85	9.26	12.07	12.96	14.46	18.19	7.71	16.62	8.86	17.09	10.63	16.81	19.82	16.37	10.84	26	13.37	13.72	AT4G26630.1	1.58e-08		DEKP3_ARATH	1.56e-07
TRINITY_DN101722_c0_g1_i1.p1	0.28	0.05	0.05	0.26	0.16	0.17	0.11	0.15	0	0.05	0.35	0.16	0.17	0.24	0	0.06	0	0.31	0.05	0.05	0.05	AT3G19050.1	2.56e-157	Kinesin-like protein KIN-12D [Source:UniProtKB/Swiss-Prot;Acc:Q27IK6]	KN12D_ARATH	2.52e-156
TRINITY_DN10172_c0_g1_i4.p1	0.25	0.45	0.43	0	0.97	0	0	0.7	0.55	0	0.27	1.15	0.26	0.22	0.25	0	0.25	0	0	0	0	AT5G41220.3	2.42e-20	Glutathione S-transferase T3 [Source:UniProtKB/Swiss-Prot;Acc:Q9FHE1]	GSTT3_ARATH	2.66e-19
TRINITY_DN10173_c0_g1_i1.p1	1.22	0.37	0	0	0.4	0	0.43	0	0	0	0.45	0	0	0.36	0.41	0.42	0.4	0	1.11	0	0
TRINITY_DN10173_c0_g1_i2.p1	0	0.62	0.75	1.22	0.34	0.18	0.53	0.96	1.13	0.85	0.37	1.12	0.36	0.3	1.23	2.08	1.54	1.11	0.16	0.34	0.15	AT4G32200.2	4.01e-08		ASY2_ARATH	4.06e-07
TRINITY_DN101747_c0_g1_i1.p1	1.23	0	1.58	1.5	0	1.35	0	2.9	0.68	2.36	0.71	2.12	0.68	0.56	1.8	1.29	0.61	1.11	1.11	2.37	0.51
TRINITY_DN101749_c0_g1_i2.p1	0	0	0	0	0	0	0	0	0	0	0	0	0	0	0	0.25	0	0	0	0.24	0.22	AT3G12580.1	1.48e-125	Probable mediator of RNA polymerase II transcription subunit 37c [Source:UniProtKB/Swiss-Prot;Acc:Q9LHA8]	HSP72_SOLLC	2.42e-127
TRINITY_DN10174_c0_g2_i4.p1	1.99	0.97	1.1	1.69	2.09	0.56	0.93	1	0.79	1.32	1.72	0.17	1.31	0.63	0.91	1.44	1.96	0.33	2.46	0.53	0.32	AT5G25830.1	4.36e-82	GATA transcription factor 12 [Source:UniProtKB/Swiss-Prot;Acc:P69781]	GAT12_ARATH	4.29e-81
TRINITY_DN101751_c0_g1_i1.p1	0.3	0	0	0	0	0	0.08	0.14	0.32	0	0	0.07	0	0.13	0.15	0.07	0.29	0.14	0.2	0	0
TRINITY_DN10175_c0_g1_i10.p1	3.89	3.16	6.12	3.58	6.98	6.18	5.44	7.12	5.54	5.05	6.61	5.94	4.77	3.67	10.51	6.78	8.22	10.25	10.92	11.08	9.95	AT2G22590.1	2.13e-179	UDP-glycosyltransferase 91A1 [Source:UniProtKB/Swiss-Prot;Acc:Q940V3]	U91A1_ARATH	2.1e-178
TRINITY_DN101765_c0_g1_i1.p1	0	0	0	0	0	0	0	0	0	0	0	0	0	0	0	0	0.33	0	0.3	0	0	AT1G72680.1	1.64e-17	Probable cinnamyl alcohol dehydrogenase 1 [Source:UniProtKB/Swiss-Prot;Acc:Q9CAI3]	ADHA_SYNY3	4.67e-20
TRINITY_DN10176_c0_g1_i1.p1	6.78	10.95	5.48	3.43	8.92	6.78	9.89	9.88	9.08	6.94	5.55	7.36	10.74	11.41	12.35	11.98	8.82	7.1	9.6	9.68	11.43	AT5G03415.1	1.01e-150	Transcription factor-like protein DPB [Source:UniProtKB/Swiss-Prot;Acc:Q9FNY2]	DPB_ARATH	9.91e-150
TRINITY_DN10177_c0_g3_i2.p1	0.26	0.59	1.46	0.51	0.54	0.25	0.51	0.5	0.87	1.57	0.91	0	0.87	1.38	0	1.12	0.28	0.3	0.28	0.3	0	AT5G46840.1	3.05e-30
TRINITY_DN10177_c0_g3_i3.p1	11.72	9.92	9.92	6.48	11.25	11.03	8.99	10.48	10.65	10.82	10.28	12.66	11.69	11.25	12.71	13.88	15.7	14.54	21.05	14.71	15.66	AT5G46840.1	2.57e-112		NOP12_CANAL	2.25e-33
TRINITY_DN101786_c0_g2_i1.p1	0	0	0	0.34	0	0	0	0	0	0.23	0	0	0	0	0	0	0	0	0	0	0.25	AT3G29185.1	3.96e-77
TRINITY_DN10178_c0_g2_i1.p1	18.85	13.66	12.44	10.37	13.97	14.12	12.38	8.72	12.52	15.18	13.98	12.76	14.78	16.47	11.24	12.51	15.01	19.3	15.86	20.79	16.54	AT2G26060.1	4.84e-169	Protein CIA1 [Source:UniProtKB/Swiss-Prot;Acc:O80990]	CIA1_ARATH	4.76e-168
TRINITY_DN10178_c0_g3_i5.p1	25.17	16.29	18.6	19.81	28.63	30.18	18.14	20.52	12.77	18.29	24.69	24.08	22.49	14.87	19.47	7.1	7.59	16.37	26.61	30.16	23.35	AT2G42570.1	3.59e-168	Protein trichome birefringence-like 39 [Source:UniProtKB/Swiss-Prot;Acc:Q9SIN2]	TBL39_ARATH	3.53e-167
TRINITY_DN1017_c0_g1_i1.p1	7.38	7.9	6.74	3.81	3.6	3.4	3.97	5.26	6.4	6.05	9.1	3.6	5.11	6.62	5.91	5.08	4.82	4.3	4.33	2.75	2.16	AT5G60710.1	0		WAV3_ARATH	1.01e-66
TRINITY_DN1017_c0_g4_i1.p1	4.76	3.86	2.65	3.14	2.37	4.05	2.43	4.2	3.58	5.44	3.73	3.14	4.98	2.51	1	1.41	1.85	1.72	1.3	0.8	0.75	AT5G60710.1	0		WAV3_ARATH	4.31e-51
TRINITY_DN1017_c1_g1_i4.p1	5.36	3.26	4.18	4.3	6.2	3.24	3.22	5.85	4.57	10.36	6.36	5.49	4.91	4.06	1.74	3.14	2.84	3.25	1.95	1.87	1.54	AT4G23740.2	0	Probable inactive receptor kinase At4g23740 [Source:UniProtKB/Swiss-Prot;Acc:Q9SUQ3]	Y4374_ARATH	0
TRINITY_DN101801_c0_g1_i1.p1	0	0	0	0	0	0	0	0	0	0	0.76	0	0	0	0	0	0	0.63	0	0	0				DAPE_MYCTU	1.11e-57
TRINITY_DN101805_c0_g1_i2.p1	0	0.38	0	0	0	0	0.87	0	0.45	0.32	0	0	0	0	0	0.42	0.41	0	0	0	0.35				POLX_TOBAC	5.46e-20
TRINITY_DN10180_c0_g1_i2.p1	2.13	1.49	13.28	3.22	2.08	0.58	1.71	3.51	12.36	5.79	3.65	2.33	6.4	3.82	7.87	6.09	6.83	4.33	2.9	4.12	6.27	AT1G54050.1	1.12e-35	17.4 kDa class III heat shock protein [Source:UniProtKB/Swiss-Prot;Acc:Q9SYG1]	HS174_ARATH	1.1e-34
TRINITY_DN101855_c0_g1_i1.p1	0	0	0	0	0	0	0	0	0	0	0	0	0	0	0.67	0	0.33	0	0.6	0	0	AT4G33150.3	1.14e-19		LYS9_MAGO7	5.2e-84
TRINITY_DN10185_c0_g1_i11.p1	4.17	1.68	6.65	5.79	5.24	3.91	3.21	4.5	2.64	6.89	8.97	5.17	5.26	2.69	5.84	0.62	3.53	5.37	4.87	4.03	1.98	AT5G60840.2	9.82e-08
TRINITY_DN10186_c0_g1_i3.p1	1.37	1.65	1.46	0.83	1.31	1.45	1.77	1.61	2.1	1.12	1.27	0.97	1.45	1.78	2.25	1.92	2.04	2.02	2.47	0.82	1.06	AT1G21280.1	4.09e-24		POLR1_ARATH	8.39e-51
TRINITY_DN10186_c0_g1_i3.p2	0.83	2.03	1.74	2.07	1.21	1.73	2.08	1.92	4.93	3.38	1.97	2.69	3.67	1.77	2.45	3.1	3.86	4.27	4.35	1.19	1.35	AT4G23160.2	1.49e-115		POLR1_ARATH	2.38e-112
TRINITY_DN10186_c0_g2_i1.p1	2.67	2.9	2.74	1.82	2.84	2.49	2.37	3.86	3.34	3.11	3.47	1.85	3.58	3.53	2.6	4.54	3.88	3.51	2.95	1.75	1.18	AT4G23160.2	2.97e-143		POLX_TOBAC	0
TRINITY_DN10186_c2_g1_i3.p1	0.88	0.86	0.25	0	0.48	0.71	1.15	1.53	0.72	0.84	0	0.35	1.17	1.98	0.98	1.1	1.42	0.73	1.4	1.79	1.08	AT4G23160.2	1.13e-116		POLR1_ARATH	6.63e-104
TRINITY_DN10186_c2_g1_i3.p2	2.24	0.58	0.55	0.38	0	1.01	0.67	1.19	0.7	1.02	0	0.29	0.68	0.84	2.56	1.3	1.58	2.03	1.45	2.48	0				POLR1_ARATH	9.8e-28
TRINITY_DN10186_c5_g1_i1.p1	0	0	0	0	0	0	0	0.41	0	0	0	0	0.47	0	0	1.35	0.43	0.4	0	0	0				POLR2_ARATH	1.51e-28
TRINITY_DN10186_c5_g1_i3.p1	0	0	0	0	0	0	0	0	0	0	0	0	0	0	0.4	0	0.4	0	0.73	0	0.35				POLX_TOBAC	7.87e-33
TRINITY_DN101872_c0_g1_i2.p1	0	0	0	0	0	0	0	0	0	0.82	0	0	0	0	0	0	0	0	0.48	0	0
TRINITY_DN101874_c0_g1_i1.p1	0.42	0.27	0.09	0.24	0.2	0.42	0.42	0.48	0.34	1.36	0.65	1.07	1.38	0.89	1.48	1.03	0.82	0.38	1.32	0.8	1.68	AT5G66520.1	2.66e-95	Pentatricopeptide repeat-containing protein At5g66520 [Source:UniProtKB/Swiss-Prot;Acc:Q9FJY7]	PP449_ARATH	2.61e-94
TRINITY_DN10187_c0_g1_i3.p1	0.62	0.41	0.27	0.36	0.3	0.16	0.32	0.71	1.01	0.5	0.16	0.29	0.96	1.2	0.47	1.54	0.3	0.85	1.97	0.75	0
TRINITY_DN10187_c0_g1_i3.p3	0.75	0	0	0.45	0	0	0.79	0	0	0	0.42	0.68	0.4	0	1.13	1.54	0.37	0	0.68	0	0.32
TRINITY_DN10187_c0_g1_i4.p1	0.14	0	0	0	0.13	0	0.42	0.38	0	0	0	0.13	0.42	0.36	5.71	1.5	0.41	0.75	2.74	1.2	1.72				YI31B_YEAST	3.77e-22
TRINITY_DN10187_c0_g1_i5.p1	1.5	1.39	0.86	0.6	0.49	1.08	2.66	3.29	0.55	2.34	0.57	4.39	1.09	1.79	4.44	0.52	0.49	1.35	0.91	0.97	1.27
TRINITY_DN10187_c2_g1_i1.p1	0.37	0	0	0	0	0	0.19	0	0.4	0	0	0	0.19	0.16	0.18	0	0.18	0	0.5	0	0.49	ATMG00750.1	1.48e-17	Uncharacterized mitochondrial protein AtMg00750 [Source:UniProtKB/Swiss-Prot;Acc:P92516]	YI31B_YEAST	2.88e-24
TRINITY_DN1018_c0_g1_i1.p1	11.55	13.04	10.51	9.83	11.23	13.35	13.19	21.36	21.33	12.3	11.31	12.53	13.03	15.89	25.59	19.05	15.5	17.94	15.76	16.33	22.11	AT5G18070.1	0	Phosphoacetylglucosamine mutase [Source:UniProtKB/Swiss-Prot;Acc:P57750]	AGM1_ARATH	0
TRINITY_DN10191_c0_g1_i3.p1	23.35	21.98	26.68	12.4	20.54	20.2	23.75	28.19	30.15	18.32	21.17	26.65	34.89	27.57	36.93	28.2	31.88	23.15	28.12	28.24	34.04	AT1G60430.2	1.71e-116	Actin-related protein 2/3 complex subunit 3 [Source:UniProtKB/Swiss-Prot;Acc:Q1ECJ7]	ARPC3_ARATH	1.68e-115
TRINITY_DN10193_c0_g2_i1.p1	3.44	4.75	4.18	5.05	3.82	1.79	4.43	4.18	6.6	3.63	6.4	4.91	5.71	6.4	9.48	11.51	11	5.96	9.65	5.87	11.58	AT1G78300.1	1.1e-84	14-3-3-like protein GF14 omega [Source:UniProtKB/Swiss-Prot;Acc:Q01525]	1433B_TOBAC	1.73e-87
TRINITY_DN10193_c0_g2_i4.p1	222.45	235.72	221.56	209.31	230.71	222.29	245.01	190.52	199.04	220.66	231.51	205.35	231.5	223.58	125.98	129.77	135.7	146.55	118.64	123.84	109.84	AT4G09010.1	4.79e-154	Thylakoid lumenal 29 kDa protein, chloroplastic [Source:UniProtKB/Swiss-Prot;Acc:P82281]	TL29_SOLLC	5.8e-174
TRINITY_DN10196_c0_g1_i2.p1	2.97	4.21	4.33	2.98	3.17	4.62	4.17	3.02	3.29	4.58	4.23	4.82	5.77	3.87	8.04	6.53	6.4	5.16	4.48	2.87	4.37	AT4G39370.2	2.01e-46	Ubiquitin carboxyl-terminal hydrolase 27 [Source:UniProtKB/Swiss-Prot;Acc:Q9FPS0]	UBP27_ARATH	2.96e-43
TRINITY_DN10196_c0_g3_i1.p1	6.04	7.4	9.67	8.28	7.54	5.91	6.2	9.25	9.83	7.62	11.04	7.28	8.27	7.2	10.18	12.39	12.91	10.1	11.05	8.34	6.94	AT4G39370.1	5.92e-65	Ubiquitin carboxyl-terminal hydrolase 27 [Source:UniProtKB/Swiss-Prot;Acc:Q9FPS0]	UBP27_ARATH	5.82e-64
TRINITY_DN101976_c0_g1_i1.p1	23.81	23.85	23.2	17.01	25.52	19.5	22.44	27.32	26.23	26.5	27.68	29.57	24.56	22.62	28.81	30.2	35.48	32.36	34.46	29.5	28.79	AT1G20200.1	0	26S proteasome non-ATPase regulatory subunit 3 homolog A [Source:UniProtKB/Swiss-Prot;Acc:Q9LNU4]	PSMD3_TOBAC	0
TRINITY_DN101977_c0_g1_i2.p1	2.05	0.3	0.69	1.06	0.87	1.16	0.92	1.77	1.6	0.93	1.06	1.48	2.09	1.46	1.96	2.02	1.01	1.55	1.75	1.32	1.23	AT3G46750.1	1.45e-29
TRINITY_DN1019_c0_g1_i4.p1	5.59	4.42	3.83	3.11	5.25	3.2	3.42	2.88	3.27	4.65	3.88	3.68	3.69	2.7	2.95	6.21	7.09	6.57	7.8	6.19	3.34	AT3G05675.2	1.15e-98	BTB/POZ domain-containing protein At3g05675 [Source:UniProtKB/Swiss-Prot;Acc:Q8RX01]	Y3567_ARATH	1.13e-97
TRINITY_DN101_c0_g1_i1.p1	4.83	2.44	3.41	1.76	3.43	3.63	3.16	3.85	4.53	5.49	3.88	3.92	4.28	3.29	6.44	5.55	4.3	4.81	8.83	5.62	7.73	AT3G06720.1	0	Importin subunit alpha-1 [Source:UniProtKB/Swiss-Prot;Acc:Q96321]	IMPA1_ARATH	0
TRINITY_DN101_c0_g1_i2.p1	30.25	30.21	26.48	18.51	31.58	33.89	29.35	40.64	38.74	39.12	35.08	35.2	38.94	34.51	59.79	49.68	50.66	51.19	63.17	62.1	62.4	AT3G06720.1	0	Importin subunit alpha-1 [Source:UniProtKB/Swiss-Prot;Acc:Q96321]	IMPA1_ARATH	0
TRINITY_DN102003_c0_g1_i2.p1	0.58	0.92	0.54	0.55	0.74	0.48	0.63	0.61	0.41	0.87	0.54	0.5	1.31	0.37	0.29	0.19	0.61	0.35	0.35	0.19	0.26	AT3G55060.1	5.12e-167
TRINITY_DN10202_c0_g1_i2.p1	7.24	10.86	8.77	8.13	6.83	7.75	8.93	10.74	11.21	8.36	11.81	11.32	8.64	10.15	12.22	9.66	10.07	9.77	15.41	10.85	11.68	AT3G20860.1	3.95e-27	Serine/threonine-protein kinase Nek6 [Source:UniProtKB/Swiss-Prot;Acc:Q9LT35]	NEK6_ARATH	3.89e-26
TRINITY_DN102052_c0_g1_i1.p1	0	0	0	0	0	0	0	0	0.64	0	0	0	0	0	0	0	0	0	0	0	0				POLR2_ARATH	9.37e-07
TRINITY_DN10205_c1_g1_i1.p1	18.12	21.66	15.05	26.49	28.39	31.11	29.32	30.3	16.77	23.28	23.87	19.38	26.07	26.24	28.45	28.52	23.27	29.96	29.09	33.32	19.11	AT3G04710.1	4.22e-22		HACE1_BOVIN	8.36e-09
TRINITY_DN10206_c0_g1_i1.p1	10.55	15.05	7.87	9.02	9.71	16.67	11.1	18.39	15.12	14.83	12.82	14	18.24	12.09	19.02	19.96	12.73	16.98	23.68	22.71	28.25	AT5G24840.1	2.38e-150	tRNA (guanine-N(7)-)-methyltransferase [Source:UniProtKB/Swiss-Prot;Acc:Q8GXB7]	TRMB_ARATH	2.34e-149
TRINITY_DN102080_c0_g1_i2.p1	0	0	0	0.38	0	0	0.17	0	0.18	0	0	0.15	0	0.14	0	0	0	0	0.29	0	0	AT2G24370.1	7.02e-71		PUB51_ARATH	2.43e-07
TRINITY_DN102097_c0_g3_i1.p1	0	0	0	0	0.55	0	0	0	0	0	0	0.26	0	0.25	0	0	0	0	0.26	0	0	AT5G66450.2	8.11e-53	Lipid phosphate phosphatase epsilon 2, chloroplastic [Source:UniProtKB/Swiss-Prot;Acc:Q6NQL6]	LPPE2_ARATH	6.27e-51
TRINITY_DN102099_c0_g1_i1.p1	1.75	1.96	1.15	1.22	0.74	1.42	1.2	2.37	1.51	1.15	0.58	1.51	1.99	1.97	2.35	2.48	1.86	3.06	1.46	1.08	1.46	AT3G48810.1	0	Pentatricopeptide repeat-containing protein At3g48810 [Source:UniProtKB/Swiss-Prot;Acc:Q9M302]	PP270_ARATH	0
TRINITY_DN102111_c0_g1_i1.p1	0	0	0	0	0	0	1.11	0	0	0	0.59	0	0.57	0	0.51	0	0	0	0	0	0	AT2G27040.2	3.43e-72	Protein argonaute 4 [Source:UniProtKB/Swiss-Prot;Acc:Q9ZVD5]	AGO4A_ORYSJ	8.25e-75
TRINITY_DN102111_c0_g2_i1.p1	0.21	0	0	0.24	0	0.21	0	0.19	0.22	0.5	0.22	0	0.64	0.36	0	0	0	0	0	0.2	0.18	AT2G27040.2	9.52e-130	Protein argonaute 4 [Source:UniProtKB/Swiss-Prot;Acc:Q9ZVD5]	AGO4A_ORYSJ	5.76e-131
TRINITY_DN102120_c0_g1_i1.p1	0	0	0	0	0	0	0	0	0	0	0	0	0	0	0	0	0	0	0.54	0	1.98	AT4G09320.1	2.44e-70	Nucleoside diphosphate kinase 1 [Source:UniProtKB/Swiss-Prot;Acc:P39207]	NDK_ASPFU	2.17e-92
TRINITY_DN102129_c0_g1_i1.p1	0	0	0	0	0	0	0.51	0	0	0	0	0	0	0.43	0	0	0	0	0	0	0				POLR1_ARATH	9.7e-06
TRINITY_DN10212_c0_g1_i1.p1	0	0	0	0	0.6	0	2.65	1.16	3.41	0.47	0	1.59	0	0	3.01	6.44	14.54	10.51	7.24	7.72	6.12	AT4G11880.3	2.44e-09	Agamous-like MADS-box protein AGL14 [Source:UniProtKB/Swiss-Prot;Acc:Q38838]	AGL14_ARATH	1.1e-06
TRINITY_DN10213_c0_g3_i1.p1	0.78	0	1.34	0	1.51	0	0	0	1.28	0.92	0.43	0.35	0	0	0.39	1.98	0	0.35	0	0	0
TRINITY_DN10213_c1_g1_i4.p1	22.46	17.58	24.53	39.58	43.77	28.43	28.26	30.6	39.53	40.25	43.51	38.88	37.06	31.31	50.86	43.26	47.92	48.43	43.1	25.08	25.72	AT5G08020.1	4.82e-06	Replication protein A 70 kDa DNA-binding subunit B [Source:UniProtKB/Swiss-Prot;Acc:Q9SD82]
TRINITY_DN10213_c1_g1_i7.p1	0.08	0.57	0.14	0.66	0.39	0.33	0.58	0.15	0.53	0.4	0.25	0	0.33	0.49	0.75	0.72	0.8	0.52	0.89	0.47	0	AT5G28780.1	2.5e-41		PIF1_DANRE	5.5e-23
TRINITY_DN10213_c1_g1_i7.p2	0	0.44	0.14	0.38	0.08	0.17	0.25	0.23	0.18	0.14	0.51	0	0.34	0.14	0.08	0.9	0.57	0.53	0.53	0.48	0
TRINITY_DN10213_c1_g1_i7.p3	0	0.49	0	0	0.26	0.57	0.85	0.25	0.3	0.88	0	0.25	0.86	0	0.27	0.83	0.54	0.25	1.24	1.33	0
TRINITY_DN10213_c2_g1_i1.p1	0.53	0.47	0.23	0	0	0.27	0	0	0	0	0.28	0.24	0.28	0	0.26	0	0.78	0	0	0.25	0
TRINITY_DN10214_c1_g1_i2.p1	1.66	2.63	3.78	3.12	2.69	2.26	1.67	2.33	4.14	4.53	3.78	3.27	2.84	3.9	5.45	5.2	5.71	6.2	7.81	5.83	4.14	AT2G27110.2	0	Protein FAR1-RELATED SEQUENCE 3 [Source:UniProtKB/Swiss-Prot;Acc:Q9ZVC9]	FRS3_ARATH	0
TRINITY_DN10215_c0_g2_i1.p1	28.62	32.93	39.25	16.9	14.44	16.5	25.13	36.86	36.59	23.75	22.62	19.09	21.51	35.34	36.97	42.18	34.14	24.38	12.53	20.47	24.5	AT5G13770.1	0	Pentatricopeptide repeat-containing protein At5g13770, chloroplastic [Source:UniProtKB/Swiss-Prot;Acc:Q66GP4]	PP379_ARATH	0
TRINITY_DN102164_c0_g1_i1.p1	0	0	0	0	0	0	0	0	0	0	0	0	0	0	0	0	0	2.76	0	0	0	AT3G10690.1	1.25e-17	DNA gyrase subunit A, chloroplastic/mitochondrial [Source:UniProtKB/Swiss-Prot;Acc:Q9CAF6]	GYRA_NOCSJ	2e-56
TRINITY_DN102165_c0_g1_i1.p1	0	0.86	0.4	0	0	0	0.49	0	0	0	0.52	0	0	0	0	0.96	0	0	0	0	0
TRINITY_DN102168_c0_g1_i2.p1	0.27	0.24	0	0	0.18	0.09	0	0	0	0	0	0.09	0	0	5	0	0.09	0.17	0	0	0	AT3G08860.1	0	Alanine--glyoxylate aminotransferase 2 homolog 3, mitochondrial [Source:UniProtKB/Swiss-Prot;Acc:Q9SR86]	AGT23_ARATH	0
TRINITY_DN10217_c0_g1_i1.p1	10.11	11.94	6.87	3.86	14.03	10.39	11.38	5.01	12.36	40.12	44.45	37.75	33.77	30.12	4.2	10.52	24.17	20.67	94.26	72.62	78.81	AT1G12090.1	1.09e-23		ERLL1_ARATH	1.12e-22
TRINITY_DN102187_c0_g1_i1.p1	0	0	0	0	0	0	0	0	0	0	0	0	0	0	0	0	0	0.52	0	0	0				Y2483_CAUVC	2.3e-37
TRINITY_DN10218_c0_g1_i12.p1	0.78	0.23	0.89	0.3	0.5	0.92	0.13	0.95	1.4	0.84	0.67	0.72	0.53	1	1.05	1.41	1.52	0.89	2.11	0.87	1.5
TRINITY_DN10218_c0_g1_i13.p1	1.11	0.66	1.44	0.22	1.07	0.19	0.94	2.21	1	1.04	1.56	1.53	3.81	1.44	2.42	3.49	2.18	2.35	0.67	0	5.89
TRINITY_DN1021_c0_g1_i2.p1	2.24	3.38	8.59	3.11	2.4	2	0.72	3.6	7.72	4.46	5.27	8.1	2.46	2.45	3.81	6.52	7.99	4.07	4.7	3.46	3.38	AT1G16030.1	0	Heat shock 70 kDa protein 5 [Source:UniProtKB/Swiss-Prot;Acc:Q9S9N1]	HSP70_SOYBN	0
TRINITY_DN102202_c0_g1_i1.p1	0	1.51	1.39	2.61	0	0	0	0	1.19	0.42	0.62	0.47	0	0	1.59	0.56	0	1.95	0.49	1.04	0	AT5G28780.1	9.12e-34		PIF1_RAT	3.07e-09
TRINITY_DN10220_c0_g1_i3.p1	1.71	1.32	1.11	0.12	1.33	1.3	2.05	1.37	1.27	3.05	2	3.08	2.07	1.37	1.41	0.63	2.2	3.21	1.26	1.24	1.34
TRINITY_DN102216_c0_g1_i1.p1	0	0	0	0	0	0	0	0	0	0	0	0	0	0	0	0	0	0	0	0	0
TRINITY_DN10221_c0_g1_i3.p1	8.71	6.89	10.66	9.08	7.77	6.12	6.35	10.25	10.41	11.85	12.28	9.33	8.33	9.8	8.66	11.62	10.91	12.16	13.5	11.41	11.8	AT1G28210.2	6.95e-150	Chaperone protein dnaJ 1, mitochondrial [Source:UniProtKB/Swiss-Prot;Acc:Q38813]	DNAJ1_ARATH	1.14e-147
TRINITY_DN102227_c0_g3_i1.p1	4.36	3.3	1.7	1.4	2.31	1.83	2.01	4.66	3.09	3.52	4.12	3.53	5.46	4.55	7.64	4.92	4.4	4.45	7.77	2.96	3.98	AT1G67120.1	0		MDN1_ARATH	0
TRINITY_DN10222_c0_g1_i6.p1	7.47	11.12	10.16	5.61	12.11	10.5	10.33	10.87	13.75	10.66	11.97	10.83	10.31	12.98	16.35	18.96	12.93	12.89	14.71	11.56	13.3	AT2G25740.2	9.13e-180		CRBN_PONAB	3.73e-41
TRINITY_DN102237_c0_g1_i1.p1	0.99	0.22	0.21	0.58	1.67	1.28	1.02	0.91	0.27	0.6	0.53	2.93	2.84	0.22	1.24	0.25	0.49	1.12	1.12	0.72	0.87	AT3G25030.3	1.09e-39
TRINITY_DN10223_c0_g1_i1.p1	1.5	2.45	1.56	0.71	2.62	3.47	5.93	2.51	2.3	0.72	0	0.82	2.22	1.05	0.9	1.22	1.78	1.36	1.09	0	1.31				TF28_SCHPO	4.98e-07
TRINITY_DN10223_c0_g1_i10.p1	24.09	19.22	17.35	13.02	21.68	25.48	25.72	31.6	23.17	24.14	15.94	22.87	29.47	29.14	34.68	39.75	28.83	31.52	30.53	29.57	17.95	AT1G21640.1	0	NAD kinase 2, chloroplastic [Source:UniProtKB/Swiss-Prot;Acc:Q9C5W3]	NADK2_ARATH	0
TRINITY_DN102249_c0_g1_i1.p1	0	0	0.15	0	0.33	0	0	0	0	0.14	0	0	0.18	0.3	0	0.34	0	0	0.16	0	0.31
TRINITY_DN10224_c4_g1_i2.p1	6.91	5.23	6.3	6.11	7.91	7.3	9.3	8.69	10.76	9.72	10.42	12.07	8.1	10.67	15.26	11.24	12.98	13	19.1	16.86	15.35	AT5G44280.1	1.57e-74	Putative E3 ubiquitin-protein ligase RING1a [Source:UniProtKB/Swiss-Prot;Acc:Q9FKW0]	RNG1A_ARATH	1.55e-73
TRINITY_DN10225_c0_g1_i1.p1	2.02	2.01	2.2	1.19	1.15	1.33	1.88	3.14	2.56	1.82	2.11	1.36	2.62	2.23	2.26	3.34	1.48	1.73	1.97	0.72	0.77	AT1G43760.1	2.26e-37		LORF2_MOUSE	2.93e-38
TRINITY_DN10225_c0_g1_i3.p1	0	0	0.25	0	0.39	0.34	0	0.69	0	0.97	0	0.53	0	0	0.88	0.78	0.29	0	1.06	0	0.91
TRINITY_DN10225_c0_g1_i4.p1	2.96	3.09	7.46	6.79	3.58	2.64	3.1	3.19	5.15	5.86	2.88	3.38	3.51	2.67	6.97	9.09	7.87	6.56	6.08	4.72	4.08	AT5G38920.1	1.25e-08
TRINITY_DN10225_c0_g1_i6.p1	0.44	0	0.34	0.49	0	0.06	0.67	0.45	0.32	0.45	0	0.56	0	0.56	0	1.33	1.98	0	0.62	0	0.27	ATMG00310.1	3.73e-23	Uncharacterized mitochondrial protein AtMg00310 [Source:UniProtKB/Swiss-Prot;Acc:P93295]	LORF2_MOUSE	1.55e-35
TRINITY_DN10225_c0_g1_i8.p1	0	0	0	0.64	1.88	3.4	0	0.72	0	0.76	0	0	0	0.48	1.57	0.19	0.53	1.92	0	1.03	2.43
TRINITY_DN10225_c0_g2_i1.p2	3.86	3.36	3.85	4.87	4.78	2.09	2.23	4.8	5.27	4.23	2.62	3.26	5.81	4.1	4.48	5.13	3.51	3.1	3.12	0.95	1.47	AT4G29090.1	1.58e-60		M310_ARATH	6.92e-23
TRINITY_DN102269_c0_g1_i1.p1	0	0	0	0	0	0	0	0	0	0	0	0	0	0	0	0	0	0	0	0	1.01				SDNS_SORAA	1.15e-24
TRINITY_DN10226_c0_g1_i1.p1	12.76	20.45	11.59	9.16	15.88	26.5	19.33	26.61	18.06	11.8	15.29	19.77	31.64	19.59	22.12	13.32	11.72	10.7	17.77	15.49	14.69	AT5G47050.1	2.89e-47		BOI_ARATH	3.41e-15
TRINITY_DN102296_c0_g1_i1.p1	0.54	3.03	2.32	4.57	4.21	3.51	2.89	2.03	7.76	3.77	3.71	8.02	14.15	10.18	37.19	8.42	9.58	11.2	20.08	31.32	32.64	AT1G10280.1	6.52e-69		BC10_ORYSJ	2.28e-31
TRINITY_DN102297_c0_g1_i1.p1	0.84	0	0	0	0.81	0	0.29	0	0.61	0.67	0.3	1.02	0	0.24	0	0	0	0	0	0	0	AT1G10460.1	7.17e-75	Germin-like protein subfamily 1 member 1 [Source:UniProtKB/Swiss-Prot;Acc:P92998]	GL11_ARATH	7.05e-74
TRINITY_DN1022_c0_g1_i1.p1	279.17	298.87	335.73	255.93	264.95	274.83	258.77	305.02	278.81	355.77	379.05	313.41	350	304.75	287.16	254.06	254.42	295.91	211.15	222.99	159.95	AT1G48030.4	0	Dihydrolipoyl dehydrogenase 1, mitochondrial [Source:UniProtKB/Swiss-Prot;Acc:Q9M5K3]	DLDH1_ARATH	0
TRINITY_DN1022_c0_g3_i1.p1	56	54.97	61.27	46.68	48.19	46.98	51.07	72.86	60.48	66.6	69.93	46.06	56.51	60.85	90.16	51.58	46.33	44.02	50.16	66.59	74.15	AT1G48030.4	0	Dihydrolipoyl dehydrogenase 1, mitochondrial [Source:UniProtKB/Swiss-Prot;Acc:Q9M5K3]	DLDH_PEA	0
TRINITY_DN1022_c1_g1_i3.p1	42.61	31.99	31.09	28.7	36.48	30.77	45	48.5	33.67	46.85	38.3	38.62	39.64	34.73	39.79	32.87	31.79	37.35	43.29	48.1	32.69	AT1G24450.1	2.2e-49	Protein NUCLEAR FUSION DEFECTIVE 2 [Source:UniProtKB/Swiss-Prot;Acc:Q9FYL8]	NFD2_ARATH	2.16e-48
TRINITY_DN102302_c0_g1_i2.p1	0.42	0	0	0	0	0	0	0	0.23	0	0	0	0	0	0	0	0	0	0	0	0	AT5G42820.2	1.67e-102	Splicing factor U2af small subunit B [Source:UniProtKB/Swiss-Prot;Acc:Q9FMY5]	U2AFA_ORYSJ	3.94e-122
TRINITY_DN102308_c0_g1_i1.p1	0	0.57	0	0.75	0	0	0	0	0.46	0	0	0.58	0.22	0.92	0.21	0.21	0.42	0	0	0.2	0.37
TRINITY_DN10230_c0_g2_i1.p1	4.67	5.4	4.09	4.73	6.1	5.22	4.44	6.28	6.92	5.48	5.05	5.49	5.68	6.61	9.93	9.28	8.34	6.66	10.15	5.72	5.81	AT2G05250.1	0		DJC14_HUMAN	2.64e-11
TRINITY_DN102314_c0_g1_i1.p1	0	0	0	0	0	0	0	0	0	0	0	0	0	0	0	0	0	0	0	0	0	AT3G56490.1	9.23e-88	Adenylylsulfatase HINT1 [Source:UniProtKB/Swiss-Prot;Acc:Q8GUN2]	HINT1_ARATH	9.08e-87
TRINITY_DN102318_c0_g1_i1.p1	0	0	0	0.47	0	0	0	0.37	0.43	0	0	0	0.42	0	0	0	0	0	0	0	0	AT1G44790.1	3.88e-84	Gamma-glutamylcyclotransferase 2-3 [Source:UniProtKB/Swiss-Prot;Acc:Q84QC1]	GCT23_ARATH	3.82e-83
TRINITY_DN10231_c0_g2_i10.p1	1.43	0.33	0.31	0	0	1.13	0.75	0.67	0.39	0.28	0	0.32	1.14	1.57	1.78	0	0.7	0	0	0.35	2.16				POLR1_ARATH	1.87e-28
TRINITY_DN102329_c0_g1_i1.p1	0	0	0	0	0	0	0	0	0	0	0	0	0	0	0	0	0	0	0	0	0	AT3G19690.1	2.19e-47		PRB1_TOBAC	6.71e-53
TRINITY_DN10232_c0_g1_i1.p1	3.56	4.57	6.54	5.51	6.67	7.2	6.55	8.5	11.08	5.02	6.86	6.58	11.36	8.65	12.36	12.86	9.2	9.5	11.16	9.13	8.8	AT5G39450.1	2.13e-172	F-box protein At5g39450 [Source:UniProtKB/Swiss-Prot;Acc:Q8RWD6]	FB271_ARATH	2.1e-171
TRINITY_DN10232_c0_g2_i1.p1	1.7	0.78	2.56	3.06	0	2.27	0.45	0.4	0.93	1.34	1.9	1.13	2.29	1.89	1.27	2.62	2.93	2.69	3.47	0	0	AT4G00230.1	7.59e-44	Subtilisin-like protease SBT4.14 [Source:UniProtKB/Swiss-Prot;Acc:Q9LLL8]	SBT4E_ARATH	7.46e-43
TRINITY_DN10234_c0_g1_i4.p1	0	0	0	0.65	1.05	0.59	0.58	4.07	1.19	0.84	0.62	1.42	1.18	0	0.53	3.93	0.53	2.92	1.47	0	1.36	AT4G23160.2	2.71e-29		M820_ARATH	1.12e-24
TRINITY_DN102355_c0_g1_i1.p1	8.34	7.42	8.46	6.36	10.64	11.74	12.59	15.35	11.98	11.58	10.52	11.34	13.47	12.05	18.82	14.07	10.33	14.83	18.88	21.9	23.16	AT5G14600.1	1.22e-144		TRM61_MOUSE	7.32e-61
TRINITY_DN102362_c0_g1_i1.p1	0.35	0.11	0	0.2	0.08	0.09	0.53	0.4	0.24	0.36	0.13	0.22	0.13	0.19	0.44	0.3	0.43	0.28	2.07	0.46	0.83
TRINITY_DN102362_c0_g3_i1.p1	0.11	0.07	0.17	0	0.16	0.26	0.11	0.21	0.21	0	0.15	0.24	0.23	0.15	0.23	0.28	0.14	0.08	1.55	0.19	0.67
TRINITY_DN102362_c0_g4_i1.p1	0	0	0	0	1.72	0	0.63	0	0	0	0	0	0	0	0	1.23	0	1.06	0	0	0.49
TRINITY_DN102375_c0_g1_i1.p1	0	0	0	0	0	0	0	0	0	0	0	0	0	0	0	0	0	0	0	0	0
TRINITY_DN10237_c0_g2_i2.p1	0.31	0.38	0.34	0.17	0.52	0.23	0	0.4	0.31	0.77	0.75	0.53	0.44	0.25	0.42	1.26	0.56	0.34	0.76	0.4	0.13	AT4G23160.2	2.11e-85		POLR1_ARATH	3.59e-107
TRINITY_DN10237_c0_g2_i6.p1	0.38	0.7	0.99	0	1.87	0	0.4	0.36	1.27	0.91	0	0.34	0.82	0.68	0	0.79	0.76	0	0.7	0.37	0	AT4G23160.2	3.64e-35		POLR1_ARATH	9.36e-38
TRINITY_DN10237_c0_g2_i9.p1	0.49	0	0.14	0.3	0.15	0.19	0	0	0	0.57	0	0.24	0	0	0.54	0.28	0.64	0.74	0.48	1.01	0.46	AT4G23160.2	1.58e-84		POLR1_ARATH	5.82e-122
TRINITY_DN10237_c0_g3_i1.p1	0.67	0.3	1.07	0.65	1.08	0.34	0.68	1.03	1.45	0.82	1.17	0.84	0.34	0.87	1.59	1.66	0.77	0.72	0.71	0.54	0.6	AT4G23160.2	1.62e-114		POLR1_ARATH	6.51e-137
TRINITY_DN10238_c0_g1_i1.p1	1.21	0.57	2.08	2.94	3.55	3.97	3.26	4.57	2.01	3.73	4.21	7.86	1.34	4.92	5.93	6.97	8.35	3.81	12.07	5.26	2.52	AT5G02440.1	5.67e-17
TRINITY_DN102394_c0_g1_i1.p1	0	0	0	0	0	0.28	0	0	0	0	0	0	0	0	0.27	0	0	0	0	0	0.23	ATMG00820.1	1.38e-29	Uncharacterized mitochondrial protein AtMg00820 [Source:UniProtKB/Swiss-Prot;Acc:P92520]	M820_ARATH	1.36e-28
TRINITY_DN102399_c0_g1_i1.p1	0.07	0.06	0.19	0.25	0.14	0	0	0.33	0.31	0.12	0.3	0.2	0.22	0.25	0.37	0	0.07	0.07	0.46	0.28	0.07	AT4G19050.1	1.86e-16	Putative disease resistance protein At4g19050 [Source:UniProtKB/Swiss-Prot;Acc:P0CB16]	DRL25_ARATH	1.83e-15
TRINITY_DN1023_c0_g1_i1.p2	2.54	4.93	5.7	6.8	6.07	3.88	5.02	6.11	10.34	7.16	7.59	7.28	7.1	3.27	8.19	7.06	11.43	12.11	9.5	6.23	2.78	AT4G23160.2	1.35e-40		POLR1_ARATH	1.78e-55
TRINITY_DN1023_c0_g1_i1.p3	0.98	2.95	2.53	2.7	3.15	1.03	3.05	1.51	3.2	5.44	1.77	3.23	2.75	2	4.87	4.62	4.8	5.9	5.61	2.52	1.41	ATMG00300.1	4.73e-07	Uncharacterized mitochondrial protein AtMg00300 [Source:UniProtKB/Swiss-Prot;Acc:P93293]	POLR1_ARATH	2.13e-28
TRINITY_DN1023_c0_g1_i2.p1	2.77	1.89	1.42	2.14	3.24	3.23	2.38	3.57	3.1	2.51	2.23	1.43	2.19	3.86	5.82	4.55	4.22	3.92	6.31	2.87	2.49	AT5G48050.1	3.83e-15		POLR1_ARATH	1.8e-17
TRINITY_DN1023_c0_g1_i5.p2	1.67	1.09	0.31	0.42	1.84	1.32	3.2	2.21	1.6	1.74	0.81	1.41	1.31	2.41	4.37	2.82	3.5	1.03	2.48	4.88	2.34	AT4G23160.2	1.65e-57		POLR1_ARATH	1.13e-72
TRINITY_DN1023_c0_g1_i5.p4	5.62	2.1	1.71	1.57	7.04	5.91	6.2	4.61	4.7	3.16	2.89	1.49	4.55	6.39	11.89	9.06	4.56	6.59	11.4	8.63	5.16	AT4G23160.2	6.62e-36		POLR1_ARATH	9.61e-56
TRINITY_DN102404_c0_g1_i2.p1	0	0	0	0	0.51	0	0	0	0	0	0.6	0	0	0	0	0	0	0	0	0	0
TRINITY_DN102414_c0_g1_i1.p1	0	0	0	0	0	0	0	0	0	0	0	0	0	0	0.55	0	0	0	1.53	0	0.94	AT5G27700.1	1.59e-29	40S ribosomal protein S21-2 [Source:UniProtKB/Swiss-Prot;Acc:Q3E902]	RS21_ASPFU	1.8e-47
TRINITY_DN102418_c0_g2_i1.p1	0	0	0	0	0	0	0	0.44	0	0.37	0	0	0.51	0	0	0	0	0	0	0	0	ATMG00300.1	1.74e-10	Uncharacterized mitochondrial protein AtMg00300 [Source:UniProtKB/Swiss-Prot;Acc:P93293]	POLR2_ARATH	3.34e-30
TRINITY_DN102429_c0_g1_i4.p1	5.83	3.83	6.46	5.98	2.43	3.11	3.51	6.62	5.49	5.25	2.78	4.82	5.36	6.28	9.92	3.84	16.01	10.18	14.36	9.26	12.83	AT3G12350.1	7.87e-49	F-box protein At3g12350 [Source:UniProtKB/Swiss-Prot;Acc:Q84WW1]	FB140_ARATH	7.75e-48
TRINITY_DN10242_c0_g1_i1.p1	99.34	91.91	84.67	69.4	81.13	90.61	99.59	116.6	75.05	80.23	48.81	60.65	70.8	83.78	92.26	69.46	60.68	80.4	85.21	113.22	158.13	AT4G32150.1	2.45e-112	Vesicle-associated membrane protein 711 [Source:UniProtKB/Swiss-Prot;Acc:O49377]	VA711_ARATH	2.41e-111
TRINITY_DN10242_c1_g2_i1.p1	0.33	0.3	1.13	0.78	1.27	1.03	0	1.83	2.51	1.57	1.07	3.25	4.16	1.15	14.74	3.66	10.66	10.11	14.87	15.22	23.9	AT5G10260.1	3.47e-142	Ras-related protein RABH1e [Source:UniProtKB/Swiss-Prot;Acc:Q9LFT9]	RAH1E_ARATH	3.42e-141
TRINITY_DN102451_c0_g1_i1.p1	0	0.42	0.39	0	0.88	0	0	0	1.5	0.36	1.02	1.21	0.98	0	0	0	0	0.41	0	0	0				POLR1_ARATH	5.99e-15
TRINITY_DN102481_c0_g1_i1.p1	2.28	0	0	0	0	0.62	0	0.54	0	0	0.66	0	0.63	2.06	0	0	0	0	0.52	0	0	AT4G36040.1	3.97e-32	Chaperone protein dnaJ 11, chloroplastic [Source:UniProtKB/Swiss-Prot;Acc:Q9FYB5]	DNJ11_ARATH	3.91e-31
TRINITY_DN10248_c0_g1_i1.p1	8.02	6.17	8.85	7.09	7.84	4.25	5.28	5.45	7.06	6.27	7.92	7.41	6.1	6.77	3.9	3.53	5.39	3.91	4.3	1.72	2.51	AT4G15450.1	4.34e-136		SDEH4_ARATH	1.02e-62
TRINITY_DN102490_c0_g1_i1.p1	0	0	0	0	0	0.3	0	0	0	0.12	0	0	0	0	0	0	0	0	0	0	0	AT5G19540.2	1.13e-155
TRINITY_DN102494_c0_g2_i1.p1	0	0	0	0	0	0	0.64	0.56	0.66	0	0	0.52	0	0	0	1.87	0.59	0.54	0	0	0	AT1G01350.1	8.85e-74	Zinc finger CCCH domain-containing protein 1 [Source:UniProtKB/Swiss-Prot;Acc:Q8GX84]	C3H1_ARATH	8.71e-73
TRINITY_DN1024_c0_g1_i1.p1	31.59	33.37	29.63	21.02	18.64	28.06	29.42	27.26	25.9	40.06	35.05	27.46	28.67	29.73	27.03	25.36	20.89	25.7	18.14	29.78	18.87	AT1G14270.1	1.76e-40
TRINITY_DN1024_c0_g3_i1.p1	2.86	3.13	2.49	2.18	1.04	2.07	4.2	2.32	0	1.9	2.81	2.71	1.85	1.62	0	0.8	0.59	1.06	3.21	3.2	0.54	AT1G14270.4	8.86e-67
TRINITY_DN1024_c0_g3_i2.p1	34.59	43.9	45.44	45.34	49.68	42.41	56.98	39.42	38.58	46.05	46.84	49.75	35.55	43.97	26.89	34.42	34.9	38.9	34.13	33.06	29.64	AT1G14270.4	3.46e-69
TRINITY_DN10250_c0_g1_i1.p1	67.02	81.19	73.24	38.74	54.84	71.16	64.5	84.41	100.61	64.09	54.27	62.51	74.72	90.79	103.1	112.77	103.54	88.53	121.23	66.25	77.87	AT2G38360.1	1.27e-68	PRA1 family protein B4 [Source:UniProtKB/Swiss-Prot;Acc:O80915]	PR1B4_ARATH	1.25e-67
TRINITY_DN102511_c0_g1_i1.p1	0	0	0	0	0.63	0	0	0	0	0	0	0	0	0.58	0	0	0	0	0	0	0	AT2G16730.1	1.63e-44	Beta-galactosidase 13 [Source:UniProtKB/Swiss-Prot;Acc:Q9SCU9]	BGA13_ARATH	1.6e-43
TRINITY_DN10252_c0_g1_i12.p1	27.96	28.06	29.1	19.22	21.35	33.1	43.17	22.98	38.42	18.43	17.35	15.19	19.68	24.72	14.7	15.77	23.52	17.34	21.1	16.84	18.15	AT4G12910.1	0	Serine carboxypeptidase-like 20 [Source:UniProtKB/Swiss-Prot;Acc:Q8L7B2]	SCP20_ARATH	0
TRINITY_DN10253_c0_g2_i1.p1	13.59	14.96	14.41	15.69	17.93	17.56	13	20.04	20.73	18.58	15.79	16.53	16.39	22.58	36.15	20.31	21.32	24.02	36.07	44.47	38.15	AT1G49590.1	1.44e-63	Zinc finger protein ZOP1 [Source:UniProtKB/Swiss-Prot;Acc:Q7XA66]	ZOP1_ARATH	1.42e-62
TRINITY_DN102542_c0_g1_i1.p2	0.15	0.26	0	0.17	0	0	0	0.14	0.16	0	0.16	0	0	0.13	0	0.15	0.15	0	0	0	0	AT5G13930.1	0	Chalcone synthase [Source:UniProtKB/Swiss-Prot;Acc:P13114]	CHS1_ORYSJ	0
TRINITY_DN10254_c0_g1_i1.p1	3.95	6.48	9.46	3.16	3.85	4.7	5.1	4.52	6.76	8.62	8.36	8.57	9.46	10.15	6.97	4.97	3.03	10.73	13.95	11.9	15.73	AT1G14060.1	9.74e-23
TRINITY_DN102564_c0_g1_i1.p1	0.38	0.17	0.16	0	1.27	0	0	0.17	0.41	0.76	0.2	0.35	0.78	0.16	0	0	0	0	0	0	0	AT3G14740.2	6.08e-104		NTO1_YEAST	8.54e-33
TRINITY_DN102590_c0_g1_i1.p1	0	0.24	0	0	0	0	0	0	0	0	0.29	0.25	0	0	0	0	0.27	0	0.74	0	0
TRINITY_DN102591_c0_g1_i1.p1	0	0	0	0	0	0	0	0	0	0	0	0	0	0	1.08	0	0	0	0	0	1.38	AT4G15233.7	7.75e-19	ABC transporter G family member 42 [Source:UniProtKB/Swiss-Prot;Acc:Q7PC82]	ABCH_ASPFU	8.95e-65
TRINITY_DN10259_c0_g2_i6.p1	42.96	51.67	40.29	44.81	43.83	38.58	43.95	56.5	51.89	46.5	52.69	53.67	48.45	51.34	43.04	35.79	43.6	42.71	52.49	42.78	38.16	AT3G29280.1	1.07e-78
TRINITY_DN1025_c1_g1_i11.p1	0	0	0	0	0	0	0.92	0	0	0	0	0	0	0	0	0	0	0	0	1.21	0
TRINITY_DN1025_c1_g1_i4.p1	2.69	1.41	0	2.75	0.75	2.45	1.47	2.15	0.42	0.61	2.55	1.37	0	2.38	1.15	1.18	0.76	2.79	2.44	0	3.97
TRINITY_DN1025_c2_g1_i1.p1	6.56	5.73	7.24	2.61	6.94	7.7	8.83	6.18	11.27	7.29	8.49	6.63	10.84	10.63	12.68	10.56	11.99	9.88	12.47	10.62	15.01	AT4G37280.1	1.05e-78	Protein MRG1 [Source:UniProtKB/Swiss-Prot;Acc:Q94C32]	MRG1_ARATH	1.04e-77
TRINITY_DN10261_c0_g1_i1.p1	11.7	13.19	6.9	6.17	16.11	26.38	16.24	16.26	13.54	7.81	6.17	8.81	10.95	13.02	14.86	7.34	9.7	15.38	33.97	28.45	28.06	AT2G35880.3	8.75e-35	Protein WVD2-like 4 [Source:UniProtKB/Swiss-Prot;Acc:Q9SJ62]	WDL4_ARATH	8.61e-34
TRINITY_DN10261_c0_g1_i2.p1	1.09	0	0	2.65	1.6	0	2.34	0.52	2.42	1.7	2.51	0.96	0.6	1.97	0.54	0	0.54	2.47	2.48	1.06	0.46
TRINITY_DN10261_c0_g2_i1.p1	0	0.77	0	1	0	0.22	0	0.2	0	0.86	0	0.39	0	0.19	0	0	0	0	0.19	0.41	0	ATMG00810.1	1.13e-45	Uncharacterized mitochondrial protein AtMg00810 [Source:UniProtKB/Swiss-Prot;Acc:P92519]	POLR1_ARATH	1.53e-60
TRINITY_DN10261_c1_g1_i1.p1	0	0.15	0	0	0.17	1.06	0.18	0.16	0	0	0.18	0	1.07	0.3	0.17	0.17	0.34	0.31	0.16	1.17	0.15	AT1G34070.1	2.65e-13		POLR1_ARATH	4.08e-08
TRINITY_DN10261_c2_g1_i1.p1	47.71	55.13	46.39	20.05	87.55	103.27	86.89	131.79	111.16	78.7	50.85	110.08	138.1	123.7	148.33	113.06	103.89	104.45	152.56	131.45	146.87	AT1G66400.1	4.57e-49	Probable calcium-binding protein CML23 [Source:UniProtKB/Swiss-Prot;Acc:Q9C8Y1]	CML23_ARATH	4.49e-48
TRINITY_DN102621_c0_g1_i2.p1	3.9	0.9	2.93	1.97	0.95	3.15	1.15	4.12	3.76	2.28	1.1	1.91	5.16	5.09	6.86	4.7	2.88	1.32	10.14	4.71	3.71	AT4G02070.2	3.6e-06	DNA mismatch repair protein MSH6 [Source:UniProtKB/Swiss-Prot;Acc:O04716]
TRINITY_DN10262_c0_g2_i2.p1	93.61	109.72	113.17	100.65	92.28	97.36	89.64	114.06	112.52	98.3	113.38	111.53	112.02	100.01	118.94	119.3	118.95	105.2	115.37	128.11	141.92	AT1G79010.1	3.59e-128	NADH dehydrogenase [ubiquinone] iron-sulfur protein 8-A, mitochondrial [Source:UniProtKB/Swiss-Prot;Acc:Q42599]	NDUS8_SOLTU	1.02e-138
TRINITY_DN102635_c0_g1_i1.p1	0	0	0	0	0	0	0	0	0	0	0	0	0.64	0	0	0	0	0	1.05	0	0
TRINITY_DN10263_c0_g2_i2.p1	61.09	61.54	50.5	31.01	53.67	52.82	61.59	61.87	66.87	46.15	40.41	65.7	60.73	67.33	68.35	71.6	68.95	66.66	81	83.93	89.13	AT3G52920.2	1.41e-72
TRINITY_DN10263_c0_g3_i1.p1	190.64	140.61	99.26	134.65	203.02	182.81	197.99	180.88	120.9	173.82	118.33	123.91	140.5	112.95	95.05	92.31	111.44	164.06	152.6	146.18	169.51	AT3G09980.1	1.94e-72
TRINITY_DN10263_c1_g1_i3.p1	32.17	36.16	37.51	30.62	35.67	33.84	24.86	34.72	40.21	41.36	38.48	34.39	38.4	32.36	31.98	29.23	31.07	31.96	29.48	22.08	23.47	AT5G64290.1	0	Dicarboxylate transporter 2.1, chloroplastic [Source:UniProtKB/Swiss-Prot;Acc:Q9FMF7]	DIT21_ARATH	0
TRINITY_DN102647_c0_g1_i1.p1	0.69	1.04	1.6	0.54	2.23	2.64	1.67	0.64	1.51	1.86	2.96	2.54	1.2	2.81	0.7	0.7	1.59	1.89	1.68	2.24	1.63	AT1G51700.1	5.66e-27	Dof zinc finger protein DOF1.7 [Source:UniProtKB/Swiss-Prot;Acc:O82155]	DOF17_ARATH	5.57e-26
TRINITY_DN10267_c0_g1_i1.p1	26.86	29.21	32.14	32.05	32.27	35.91	30.68	34.17	37.46	30.59	31.23	30.43	33.11	41.08	37.8	28.69	38.81	38.24	46.22	59.52	49.66	AT4G27120.3	1.06e-67	DDRGK domain-containing protein 1 [Source:UniProtKB/Swiss-Prot;Acc:Q94C53]	DDRGK_ARATH	1.83e-65
TRINITY_DN10267_c0_g1_i2.p1	0.55	1.66	1.65	2.01	1.26	1.24	0.78	0	0.62	0.98	1.25	0	1.07	1.08	0.55	1.83	0	0	2.47	1.65	0.57	AT4G27120.3	1.84e-21	DDRGK domain-containing protein 1 [Source:UniProtKB/Swiss-Prot;Acc:Q94C53]	DDRGK_ORYSJ	3.88e-20
TRINITY_DN10268_c0_g3_i1.p1	0.35	0	1.37	0.82	1.18	0.36	0.54	0.97	0.57	1.85	2.78	2.91	1.09	0.76	1.59	1.22	1.21	1.6	0.32	0.68	0.16	AT1G64080.1	3.29e-09	Probable membrane-associated kinase regulator 2 [Source:UniProtKB/Swiss-Prot;Acc:Q9SH58]	MAKR2_ARATH	3.24e-08
TRINITY_DN102692_c0_g1_i1.p1	0	0	0	0	0	0	0	0	0	0	0	0	0	0	0	0	0	0	0.4	0	0
TRINITY_DN102692_c0_g1_i2.p2	0	0	0	1.16	0	0	0	0	0	0	0	0	0	0	0	0	0	0	0	0	0
TRINITY_DN1026_c0_g1_i2.p1	0.41	0.18	0	0	0.2	0	0.21	0.57	0.22	0.16	0.22	0.19	0.64	0.35	0.21	0.41	0.6	0.56	0.74	0	0
TRINITY_DN1026_c1_g1_i4.p1	3.51	5.66	2.35	1.49	2.3	5.73	5.36	8.8	7.78	5.18	4.02	4.13	7.39	6.74	10.31	13.63	13.48	8.56	8.82	2.16	2.7
TRINITY_DN1026_c1_g2_i1.p1	0.99	0.67	0	0.29	0.72	3.08	1.02	5.94	0.54	1.79	0.53	1.13	9.8	4.52	4.47	2.98	3.16	4.94	3.81	6.45	1.09
TRINITY_DN1026_c1_g3_i1.p1	1.51	4.48	0.65	0.45	0.73	1.2	5.54	3.87	0.83	1.19	1.25	0.68	2.01	3	2.63	4.23	2.97	2.39	1.03	0	0
TRINITY_DN1026_c2_g2_i1.p1	2.79	1.14	1.31	0.3	1.71	2.9	1.31	2.11	0.28	1.02	1.36	2.31	2.12	2.43	1.78	3.82	3.49	2.3	2.3	0.98	0.44
TRINITY_DN1026_c4_g1_i4.p1	0.59	0.35	0	0	0.19	0	0	0.54	0	0	0.21	0.36	0.81	0.51	0.59	0.39	0	0.53	0.71	0.19	0
TRINITY_DN102712_c0_g1_i1.p1	0	0	0	0	0	0	0	0	0	0	0	0	0	0	0.58	0.06	0	0	0.63	0	2.05	AT4G35970.2	1.57e-11	L-ascorbate peroxidase 5, peroxisomal [Source:UniProtKB/Swiss-Prot;Acc:Q7XZP5]	KATG_PYRTR	0
TRINITY_DN10271_c0_g1_i13.p1	11.06	11.2	12.09	10.01	12.07	10.07	10.67	12.88	12.95	14.64	15.15	15.14	13.63	12.57	14.19	10.73	15.41	14.13	17.32	12.99	11.51	AT3G52640.1	0	Nicastrin [Source:UniProtKB/Swiss-Prot;Acc:Q8GUM5]	NICA_ARATH	0
TRINITY_DN102722_c1_g2_i4.p1	0	0	0	0	0	0	0	0.39	0	0	0	0	0	0.37	0	0	0	0	0	0	0
TRINITY_DN10272_c0_g1_i2.p1	5.96	6.66	5.35	7.58	8.13	8.86	8.58	6.72	8.78	8.5	10.59	9.26	9.24	8.25	12.06	8.14	10.23	9.58	13.37	10.73	13.86	AT3G29310.1	1.39e-18	BAG family molecular chaperone regulator 8, chloroplastic [Source:UniProtKB/Swiss-Prot;Acc:Q9LIB3]	BAG8_ARATH	1.37e-17
TRINITY_DN10273_c0_g1_i2.p1	18.35	10.52	14.54	14.92	17.57	16.86	15.74	16.91	16.75	19.98	17.6	16.61	21.61	20.44	17.96	16	19.3	20.6	23.14	21.57	19.95	AT3G15220.1	0		SVKA_DICDI	8.13e-113
TRINITY_DN102740_c0_g1_i1.p1	0.34	0	0	0	0.33	0	0	0.64	0.38	0	0	0	0.37	0	0	0	0	0	0	0	0	AT4G23160.2	9.41e-43		POLR1_ARATH	2.92e-64
TRINITY_DN102745_c0_g1_i1.p1	0	0	0	0	0	0	0	0	0	0	0	0	0	0	0	0	0	0	0	0	0	AT5G62000.2	1.08e-72	Auxin response factor 2 [Source:UniProtKB/Swiss-Prot;Acc:Q94JM3]	ARFX_ORYSJ	6.85e-98
TRINITY_DN102752_c0_g1_i1.p1	0.16	0	0	0.09	0.08	0.17	0	0.6	0	0.13	0.25	0.15	0	0.07	0.08	0.24	0.08	0.89	0.59	0.24	0.07	AT4G33970.1	5.17e-151	Pollen-specific leucine-rich repeat extensin-like protein 4 [Source:UniProtKB/Swiss-Prot;Acc:O81765]	PLRX4_ARATH	5.09e-150
TRINITY_DN102769_c0_g1_i1.p1	0.12	0	0.21	0.57	0	0.38	0.38	0.23	0	0.1	0	0	0	0.21	0.12	0	0.12	0	0	0.24	0				RTBS_DROME	1.1e-21
TRINITY_DN102769_c0_g1_i6.p1	0.17	0	0	0	0	0.18	0	0	0	0	0	0.16	0	0.15	0	0	0	0	0.48	0	0.31
TRINITY_DN102772_c0_g1_i1.p1	1.64	0	0	0	0.53	0	0	0	0	0	0	0	0	0	0	0	0	0	0	0	0	AT2G18600.2	1.36e-82	Probable NEDD8-conjugating enzyme Ubc12-like [Source:UniProtKB/Swiss-Prot;Acc:Q9ZU75]	UB12L_ARATH	1.34e-81
TRINITY_DN102775_c0_g1_i1.p1	0	0	0	0	0	0	0	0	0	0	0	0	0	0.1	0.85	0.71	0.47	0.33	0.76	1.28	1.4	AT5G22890.1	3.38e-105		STOP2_ARATH	3.33e-104
TRINITY_DN102776_c0_g1_i2.p1	0.11	0.14	0.33	0.13	0.48	0.06	0.33	0.25	0.12	0.09	0.62	0.41	0.5	0.19	0.06	0.11	0.11	0	0.15	0	0	AT3G52490.1	0	Protein SMAX1-LIKE 3 [Source:UniProtKB/Swiss-Prot;Acc:Q9SVD0]	SMXL3_ARATH	0
TRINITY_DN10277_c0_g1_i1.p1	0.16	0	1.53	0.82	1.83	0	0.82	1.43	0	0	1.04	1.17	1.29	0.34	0.66	0.35	1.53	0.94	1.57	0.84	1.21	AT5G67360.1	1.31e-130	Subtilisin-like protease SBT1.7 [Source:UniProtKB/Swiss-Prot;Acc:O65351]	SBT1_LOTJA	0
TRINITY_DN10277_c0_g1_i7.p1	0.38	0.98	0	0	0	1.47	0.29	0.17	0.79	0.58	0.52	0.44	0	0.98	0.25	0.95	0	0.28	0.44	0	0	AT5G67360.1	1.09e-146	Subtilisin-like protease SBT1.7 [Source:UniProtKB/Swiss-Prot;Acc:O65351]	SBT4_LOTJA	0
TRINITY_DN10277_c0_g1_i8.p1	0.45	0	0	0	0	0.26	0	0	0.34	0.65	0	0.44	0	0	0	0.27	0	0.63	0.99	0.79	0	AT5G67360.1	1.6e-161	Subtilisin-like protease SBT1.7 [Source:UniProtKB/Swiss-Prot;Acc:O65351]	SBT1_LOTJA	0
TRINITY_DN10279_c1_g1_i1.p1	5.32	4.56	2.6	1.63	4.91	4.8	5.47	4.28	3.02	3.54	1.48	4.65	2.17	1.61	3.72	3.25	4.1	5.04	4.82	1.79	1.63				R1B13_SOLDE	2.35e-14
TRINITY_DN1027_c0_g1_i10.p1	11.63	10.52	11.71	6.68	11.95	11.04	10.97	11.42	14.05	10.45	12.28	9.88	10.79	9.76	9.26	10.83	11.28	7.21	13.5	12.29	10.02	AT1G52540.2	2.16e-147		Y3589_ARATH	1.92e-143
TRINITY_DN1027_c0_g2_i1.p1	31.62	33.52	20.91	11.2	25.76	27.73	25.18	26.9	21.75	25.33	18.6	17.66	17.95	19.68	13.99	17.19	18.74	18.28	16.89	15.06	15.99	AT3G15890.1	1.99e-146	PTI1-like tyrosine-protein kinase At3g15890 [Source:UniProtKB/Swiss-Prot;Acc:Q9LSC2]	Y3589_ARATH	1.95e-145
TRINITY_DN102805_c0_g1_i1.p1	0	0.46	0.86	0.6	0.97	0	1.06	0	0	0.78	0	0	0	0	0	1.03	0	0.45	0	0	0	AT1G32130.2	5.37e-14		IWS1_ARATH	5.41e-13
TRINITY_DN102808_c0_g1_i1.p1	0	0	0	0	0	0	0	0	0.19	0	0	0	0	0	0	0	0	0	0	0	0	AT4G19006.1	6.62e-170	26S proteasome non-ATPase regulatory subunit 13 homolog B [Source:UniProtKB/Swiss-Prot;Acc:Q8GYA6]	PS13B_ARATH	6.51e-169
TRINITY_DN10280_c0_g3_i1.p1	78	84.47	88.71	79.17	88.96	71.8	74.49	98.7	93.67	88.79	110.68	87.67	82.84	84.24	116.36	93.94	128.02	129.1	129.47	158.36	150.79	AT1G02140.1	2.74e-98	Protein mago nashi homolog [Source:UniProtKB/Swiss-Prot;Acc:O23676]	MGN2_ORYSJ	2.97e-100
TRINITY_DN102813_c0_g1_i1.p1	0	0.46	0	0	0.48	0	1.05	0	0	0	0	0	0	0	0	0	0	0	0	0	0	AT5G02500.2	7.69e-111	Probable mediator of RNA polymerase II transcription subunit 37e [Source:UniProtKB/Swiss-Prot;Acc:P22953]	HSP7C_PETHY	3.4e-111
TRINITY_DN102813_c0_g1_i5.p1	0	0	0	0	0	0	0	0	0	0	0	0	0	0	0	0	0	0	0	0.3	0	AT5G02500.2	1.78e-143	Probable mediator of RNA polymerase II transcription subunit 37e [Source:UniProtKB/Swiss-Prot;Acc:P22953]	HSP72_SOLLC	3.87e-145
TRINITY_DN102813_c0_g2_i1.p1	0	0	0	0	0	0	0	0	0	0	0	0	0	0	0	0	0	0	0	0	0	AT5G02500.2	1.17e-60	Probable mediator of RNA polymerase II transcription subunit 37e [Source:UniProtKB/Swiss-Prot;Acc:P22953]	HSP70_TRIRU	1.73e-74
TRINITY_DN102839_c0_g2_i1.p1	0	0	0	0	0	0	0	0	0.52	0	0	0	0	0	0	0	0	0	0	0	0.4	AT5G23670.1	9.06e-108	Long chain base biosynthesis protein 2a [Source:UniProtKB/Swiss-Prot;Acc:Q9LSZ9]	LCB2A_ORYSJ	7.2e-121
TRINITY_DN10283_c0_g3_i2.p1	21.89	22.25	11.63	13.95	25.14	23.3	19.4	28.11	18.39	31.46	27.09	16.96	17.91	12.85	11.35	7.48	10.6	9.28	11.38	21.29	10.81	AT3G19450.1	6.07e-171	Cinnamyl alcohol dehydrogenase 4 [Source:UniProtKB/Swiss-Prot;Acc:P48523]	CADH1_OCIBA	0
TRINITY_DN102844_c0_g1_i1.p1	0.14	0	0.24	0	0	0	0	0	0	0	0	0	0.15	0	0.14	0	0	0	0	0	0.25	AT2G31040.1	3.15e-112		CG160_ARATH	3.09e-111
TRINITY_DN102846_c0_g1_i1.p1	0	0	0	0	0	0	0	0	0	0	0	0	0	0	0	0	0	0.29	0	0	0.28	AT1G27190.1	3.24e-78	Probable inactive receptor kinase At1g27190 [Source:UniProtKB/Swiss-Prot;Acc:O04567]	Y1719_ARATH	3.19e-77
TRINITY_DN102846_c0_g2_i1.p3	0	0	0	0	0	0.33	0	0	0.35	0	0	0	0	0	0	0	0.31	0	0	0	0	AT1G69990.1	1.36e-54	Probable LRR receptor-like serine/threonine-protein kinase At1g69990 [Source:UniProtKB/Swiss-Prot;Acc:C0LGI5]	Y1699_ARATH	1.34e-53
TRINITY_DN10284_c0_g3_i4.p1	1.01	1.22	2.9	0.4	1.63	0.35	0.7	0.31	1.84	2.4	1.1	0.91	1.42	0.3	2.01	1.71	3.31	2.44	3.05	0.65	1.46	AT3G29765.1	1.94e-88		ZMYM1_HUMAN	6.32e-10
TRINITY_DN102861_c0_g1_i1.p1	0.73	0	0	0.21	0.52	0.19	0.56	0.17	0.2	0.73	0.19	0.67	0.37	0.16	0.18	0	0	0	0.33	0	0	AT5G45700.1	2.7e-60		HZG_DROME	8.56e-43
TRINITY_DN102867_c0_g1_i1.p1	0	0	0.77	0.54	0	0	0.47	0	0	0.35	0	0	0.97	0	0	0	0	0	0	0	0
TRINITY_DN102870_c1_g1_i1.p1	0	0	0	0	0	0	0	0	0	0	0	0	0	0	0	0	0	0	0	0	0	AT1G24430.1	4.94e-23		SALAT_PAPSO	2.58e-14
TRINITY_DN102876_c0_g1_i1.p1	0	0	0	0	0.53	0	0.59	0	0	0.42	0	0	0	0	0	0	0	0	0.99	0	0
TRINITY_DN102882_c0_g1_i1.p1	0	0	0	1.1	0	0	0	0	0	0	0.52	0.41	0.5	0	0	0	0	1.25	0	0	1.17	AT2G01050.1	4.65e-18
TRINITY_DN102882_c0_g1_i1.p2	0	0	0	0	0	0	0	0	0	0.4	0	0	0	0	0.51	0	0	0	0	0	0	AT3G24255.3	6.28e-11		RNHX1_ARATH	8.85e-13
TRINITY_DN10288_c0_g1_i1.p1	1.01	0.6	1.31	0.59	0.81	1.04	0	0.31	0.55	0.14	0.35	0	0.17	0.29	0.34	0.67	0.83	0.15	0.3	0.33	0.3	AT3G24255.4	2.47e-45		RNHX1_ARATH	2.5e-19
TRINITY_DN102896_c0_g1_i1.p2	0.26	0	0	0	0	0	0.26	0.47	0.28	0	0.27	0	0.53	0.22	0.26	0.26	0	0.23	0	2.22	0.45
TRINITY_DN102898_c0_g1_i1.p1	0	0	0	0	0	0	0	0	0	0	0	0	0	0	0	0	0	0	0	0	0.52	AT5G05200.1	6.88e-79	Uncharacterized aarF domain-containing protein kinase At5g05200, chloroplastic [Source:UniProtKB/Swiss-Prot;Acc:Q9ASX5]	Y5520_ARATH	6.76e-78
TRINITY_DN102898_c0_g2_i1.p1	0	0	1.18	0	0	0	0	0	0	0	0	0	0	0	0	0	0	0	0	0	0	AT5G05200.1	7.76e-65	Uncharacterized aarF domain-containing protein kinase At5g05200, chloroplastic [Source:UniProtKB/Swiss-Prot;Acc:Q9ASX5]	Y5520_ARATH	7.63e-64
TRINITY_DN102917_c0_g1_i1.p1	0	0.14	0	0	0	0	0	0.14	0	0.5	0	0	0	0	0	0.15	0.15	0.14	0	0	0	AT1G80930.1	7.78e-156		CWC22_HUMAN	6.94e-103
TRINITY_DN102920_c0_g1_i4.p1	1.04	0.99	0.07	0.37	0.31	0.24	0.4	0.07	0.52	0	0.25	0.38	0.16	0.07	0.08	0.16	0.08	0.07	0.15	0.23	0.07	AT5G63940.1	3.31e-93		STU_ARATH	8.93e-66
TRINITY_DN102923_c0_g1_i1.p1	0	0	0	0	0	0	0	0	0	0	0	0	0	0	0	0	0	0	0	0	0	AT1G09795.1	1.81e-92	ATP phosphoribosyltransferase 2, chloroplastic [Source:UniProtKB/Swiss-Prot;Acc:Q8GSJ1]	HIS1_ORYSJ	1.36e-133
TRINITY_DN102924_c0_g1_i2.p1	0	0	0	0	0.46	0	1	0	0	0.37	0.53	0	0	1.26	0	0.97	0.46	0	0	0.45	0.8	AT1G68850.1	2.34e-74	Peroxidase 11 [Source:UniProtKB/Swiss-Prot;Acc:Q96519]	PER11_ARATH	2.3e-73
TRINITY_DN10294_c0_g1_i1.p1	46.16	39.81	37.33	42.01	47.62	48.75	39.84	38.17	31.46	45.07	41.79	41.04	40.38	34.86	24.89	21.78	24.33	32.38	34.81	47.46	32.69	AT1G07750.1	0		GLUA2_ORYSJ	1.22e-30
TRINITY_DN102950_c0_g1_i1.p1	0	0.86	0	0	0	1	0	0	0	0	0	0	0	0.41	0	0.48	0	0	0	2.7	0
TRINITY_DN102950_c0_g1_i1.p2	0	0	0	0	0	0.62	1.22	0	0	0	0	0	0	0	0	0	1.69	1.03	0.52	0	0.95	AT1G27870.1	2.23e-09		RNH_HALSA	7.8e-08
TRINITY_DN10295_c0_g2_i1.p1	0	0	0.48	0	0	0	1.19	0	0	0.43	1.27	0	0.61	0	0	0	0	0	0.5	0.54	0
TRINITY_DN102964_c0_g1_i1.p1	0	0	0	0	0	0	0	0	0	0	0	0	0	0	0	0	0	0	0	0	1.11
TRINITY_DN102969_c0_g1_i1.p1	0	0	0	0	0	0	0	0	0	0.42	0.28	0	0	0	0	0	0	0.24	0	0	0	AT4G24180.1	2.83e-78		THLP1_ARATH	2.03e-75
TRINITY_DN10296_c0_g1_i2.p1	74.42	71.25	76.61	57.42	67.79	67.97	57.21	76.73	75.5	97.34	87.45	73.19	83.83	70.21	89.46	77.46	81.61	81.44	93.76	77.4	62.27	AT5G37510.1	0	NADH dehydrogenase [ubiquinone] iron-sulfur protein 1, mitochondrial [Source:UniProtKB/Swiss-Prot;Acc:Q9FGI6]	NDUS1_SOLTU	0
TRINITY_DN102971_c0_g1_i1.p1	0	0	0	0	0	0	0	0	0	0	0	0	0.41	0.34	0.77	0.4	0	0	0.35	0	0	AT1G40390.1	6.2e-11
TRINITY_DN10297_c0_g1_i10.p1	8.23	3.85	3.36	3.08	9.1	9.55	5.06	5.71	4.2	4.79	2.93	3.44	4.95	5.22	5.8	5.55	4.12	6.64	12.09	8.25	9.96	AT3G28050.1	7.92e-79	WAT1-related protein At3g28050 [Source:UniProtKB/Swiss-Prot;Acc:Q94JU2]	WTR18_ARATH	7.79e-78
TRINITY_DN102981_c0_g1_i1.p1	0	0	0	0	0	0	0	0.48	0	0	0	0	0	0.92	0	0	0	0	0	0	0
TRINITY_DN102984_c0_g1_i1.p1	0	0	0	0	0	0	0	0	0	0	0	0	0	0	0	0	0	0	0	0	0				INDA1_HYPAT	2.59e-62
TRINITY_DN10299_c0_g1_i1.p1	4.53	4.65	4.35	4.26	3.26	3.58	3.07	4.01	6.25	4.64	5.1	5.37	5.17	3.26	2.3	5.15	4.24	4.13	2.44	1.98	1.47	AT3G23590.1	0	Mediator of RNA polymerase II transcription subunit 33A [Source:UniProtKB/Swiss-Prot;Acc:Q9LUG9]	MD33A_ARATH	0
TRINITY_DN10299_c0_g1_i1.p2	2.96	1.26	0.73	1.08	1.7	1.54	1.11	1.32	2.19	2.28	2.27	2.05	2.06	1.37	1.37	3.74	2.49	1.92	1.3	1.06	0.3	AT3G23590.1	3.62e-170	Mediator of RNA polymerase II transcription subunit 33A [Source:UniProtKB/Swiss-Prot;Acc:Q9LUG9]	MD33A_ARATH	3.56e-169
TRINITY_DN1029_c1_g1_i1.p1	17.87	20.1	15.1	9.29	22.1	15.35	20.34	21.99	19.17	17.29	19.08	23.21	24.41	21.4	36.69	25.06	23.39	20.07	31.26	33.09	34.36	AT5G41950.1	0		HLB1_ARATH	0
TRINITY_DN102_c0_g1_i1.p1	1.65	0.84	1.42	0.55	3.18	1.47	0.73	0.65	2.82	1.89	1.76	2.15	2.94	1.84	1.18	3.07	5.56	2.35	4.27	3.87	3.73
TRINITY_DN102_c1_g1_i12.p1	0	0	0	0	0	0	0	0	0	0	0	0	0.46	0	0	0	0	0	0	0	0	ATMG01250.1	1.26e-11	Uncharacterized mitochondrial protein AtMg01250 [Source:UniProtKB/Swiss-Prot;Acc:P92555]	LORF2_HUMAN	4.04e-19
TRINITY_DN102_c1_g1_i2.p1	8	7.57	2.88	2.37	5.17	9.12	6.95	13.02	3.28	3.18	5.83	6.3	10.94	12.89	13.65	12.18	5.58	9.07	7.86	12.25	8.38	ATMG01250.1	2.56e-09	Uncharacterized mitochondrial protein AtMg01250 [Source:UniProtKB/Swiss-Prot;Acc:P92555]	M1250_ARATH	2.52e-08
TRINITY_DN102_c1_g1_i7.p1	5.22	7.37	4.94	3.8	5.52	5.68	6.41	5.52	6.49	6.59	6.39	7.03	5.71	6.71	11.48	6.99	9.78	13.54	27.5	14.66	15.5	AT3G24255.3	3.72e-06		RNHX1_ARATH	1.35e-14
TRINITY_DN102_c1_g1_i7.p2	1.97	2.08	2.55	1.56	1.91	1.72	3.41	1.52	2.87	4.43	2.15	2.66	0	2.59	4.91	3.33	2.58	3.57	8.92	7.29	5.4	ATMG01250.1	9.38e-12	Uncharacterized mitochondrial protein AtMg01250 [Source:UniProtKB/Swiss-Prot;Acc:P92555]	LORF2_HUMAN	1.08e-17
TRINITY_DN103008_c0_g1_i1.p1	0	0	0	0.37	0	0	0	0	0	0	0	0	0	0	0.63	0	0.93	0.29	0.57	0	0
TRINITY_DN103012_c0_g1_i1.p1	0	0	0	0	0	0.4	0	0	0	0.3	0	0	0	0	0	0	0	0	0	0	0.32	AT5G40760.1	3.76e-78	Glucose-6-phosphate 1-dehydrogenase, cytoplasmic isoform 2 [Source:UniProtKB/Swiss-Prot;Acc:Q9FJI5]	G6PD_SOLTU	4.31e-79
TRINITY_DN10301_c0_g1_i2.p1	126.65	124.13	132.85	81.55	106.48	113.25	106.56	134.91	103.43	146.54	137.73	109.36	151.37	130.47	194.01	174.04	165.44	169.78	167.37	118.3	90.63	AT3G19170.1	0	Presequence protease 1, chloroplastic/mitochondrial [Source:UniProtKB/Swiss-Prot;Acc:Q9LJL3]	PREP1_ARATH	0
TRINITY_DN103028_c0_g1_i1.p1	0	0	0	0	0	0	0	0	0	0	0	0	0	0	1.06	0.17	0.69	0	1.27	0	2.18				UBXN1_CAEEL	7.73e-18
TRINITY_DN10302_c0_g1_i2.p1	350.57	421.93	406.98	386.13	390.26	414.01	407.27	477.42	431.01	475.48	467.12	435.13	428.83	377.21	330.33	349.15	340.88	397.98	302.68	315.79	239.54	AT4G25130.1	6.38e-119	Peptide methionine sulfoxide reductase A4, chloroplastic [Source:UniProtKB/Swiss-Prot;Acc:P54150]	MSRA_LACSA	2.75e-132
TRINITY_DN103033_c0_g1_i1.p1	0	0	0	0	0	0	0	0	0	0	0	0	0	0	0	0	0	0	0.48	0	0.7	AT4G24520.1	1.41e-27	NADPH--cytochrome P450 reductase 1 [Source:UniProtKB/Swiss-Prot;Acc:Q9SB48]	ASCE_ACREG	2.2e-47
TRINITY_DN10303_c0_g1_i5.p1	7.6	7.08	6.81	4.82	6.9	7.34	6.46	8.5	8.96	10.22	8.8	8.45	13.17	10.57	7.4	8.62	10.31	13.95	12.14	11.88	7.78	AT1G26180.1	6.66e-86
TRINITY_DN10303_c0_g1_i8.p1	0.29	0.83	0.38	0.93	0.21	0.44	0.37	0.13	0.79	0.3	0.53	0.95	0.74	0.37	0.59	1.15	0.93	0.2	0.13	0.14	0.07	AT1G34070.1	1.15e-08		POLR2_ARATH	2.66e-25
TRINITY_DN103040_c0_g1_i1.p1	0	0.2	0	0	0.22	0	0.46	0	0	0	0	0	0	0.59	0	0.45	0	0	0	0	0
TRINITY_DN103045_c0_g1_i1.p1	0	0.36	0	0	0	0	0	0.37	0	0	0	0	0	0	0	0.4	0	0	0	0	0	AT5G18570.1	1.51e-26	GTP-binding protein OBGC, chloroplastic [Source:UniProtKB/Swiss-Prot;Acc:Q8L7L0]	OBGC1_ORYSJ	2.25e-38
TRINITY_DN103047_c0_g1_i3.p1	2.02	0.74	12.18	3.38	4.32	3.01	1.7	2.26	7.09	1.27	4.93	3.96	3.46	4.65	17.66	4.55	4.78	4.02	6.6	3.91	4.16	AT5G02020.1	1.45e-20
TRINITY_DN10304_c0_g1_i1.p1	0.66	1.52	0.65	0.51	0.28	0.66	0.4	1.43	0.79	0.44	1.74	0.86	0.29	1.64	1.37	0.86	1.01	1.51	2.03	1.34	1.33	AT5G47430.4	5.75e-09		RBBP6_HUMAN	1.42e-08
TRINITY_DN10304_c0_g1_i6.p1	3.11	3.55	5.13	4.16	4.84	3.46	2.89	4.48	6.8	4.72	6.58	5.15	5.11	3.77	6.39	8.12	7.91	6.34	7.73	6.22	3.23	AT5G47430.3	2.1e-09		RBBP6_HUMAN	1.27e-08
TRINITY_DN10304_c0_g1_i7.p1	0	0	0.14	0	1.12	0	0.37	0.53	0.58	0.41	0	0.6	1.13	0.16	0.64	0.78	1.29	0.62	0.48	0	0.64	AT5G47430.1	4.92e-09		RBBP6_HUMAN	2.69e-08
TRINITY_DN10305_c0_g1_i1.p3	0.61	0.58	1.05	0	1.2	0	0.66	2.32	1.36	2.36	0.71	1.06	2.04	1.67	3.01	0.64	3.03	0.55	1.67	1.19	1.53
TRINITY_DN10305_c0_g3_i1.p1	2.75	1.02	1.37	1.1	3.25	3.84	1.99	5.13	5.25	2.16	3.51	3.84	3.77	5.07	6.86	5.74	4.1	7.6	11.2	10.63	8.44	AT4G23160.2	1.65e-91		POLR1_ARATH	1e-109
TRINITY_DN10305_c0_g3_i1.p4	2.81	0.53	0.97	0.68	2.75	1.22	0	0.53	3.52	0	0	0	1.85	0.51	4.69	3.52	0.61	2.84	3.06	2.46	3.77	AT4G23160.2	2.63e-24		POLR1_ARATH	1.95e-33
TRINITY_DN10305_c0_g3_i3.p1	0.84	0.45	0.96	0.79	1.79	0.34	1.6	1.17	0.82	1.04	0.91	1.82	0.86	0.8	2.19	1.92	3.53	1.86	2.84	1.39	1.25	ATMG00300.1	1.83e-10	Uncharacterized mitochondrial protein AtMg00300 [Source:UniProtKB/Swiss-Prot;Acc:P93293]	POLR1_ARATH	2.06e-65
TRINITY_DN10305_c0_g4_i1.p1	1.01	0.49	0.58	0.13	1.38	1.58	0.71	2.75	0.72	1.72	1.92	1.65	2.27	2.66	3.1	1.64	1.71	2.22	3.92	3.54	2.56	AT1G34070.1	2.14e-12		POLR1_ARATH	1.9e-19
TRINITY_DN10305_c0_g5_i1.p1	5.06	7.7	4.53	3.71	3.93	7.09	5.74	6.25	3.71	4.64	2.69	3.62	6.14	5.53	9.31	6.65	7.7	7.37	9.8	7.47	5.92	AT4G23160.2	6.01e-129		POLR1_ARATH	6.01e-154
TRINITY_DN103063_c0_g1_i1.p1	0	0.33	0.63	0.44	0	0	0	0	0	0	0	0	0	0	0	0	0.36	0.33	0	0.35	0	AT1G52800.1	3.71e-55		AOP1L_ARATH	8.93e-50
TRINITY_DN103067_c0_g1_i2.p1	0	0	0	0	0	0	0	0	0	0	0	0	0	0	0	0	0	0	0	0	0	AT4G37040.1	5.35e-76	Methionine aminopeptidase 1D, chloroplastic/mitochondrial [Source:UniProtKB/Swiss-Prot;Acc:Q9FV50]	MAP1D_ARATH	5.26e-75
TRINITY_DN10306_c0_g2_i1.p1	5.3	5.62	4.22	4.88	7.53	6.08	6.01	4.96	4.48	3.22	4.99	1.45	2.19	2.53	3.24	7.1	6.84	4.43	3.33	3.55	2.45	AT5G41980.1	1.57e-12
TRINITY_DN10306_c0_g2_i1.p3	6.74	6.64	5.03	3.23	5.24	10.1	9.02	5.05	4.94	5.28	5.54	7.95	4.85	3.6	7.56	4.16	6.2	8.94	3.67	3.48	3.82
TRINITY_DN10306_c0_g2_i4.p1	107.1	112	95.28	94.05	105.44	100.08	105.52	110.38	105.7	109.98	100.23	95.68	117.15	106.97	43.77	52.63	57.95	66.37	64.73	64.78	48.42	AT3G07410.1	3.14e-121	Ras-related protein RABA5b [Source:UniProtKB/Swiss-Prot;Acc:Q9SRS5]	RAA5B_ARATH	3.09e-120
TRINITY_DN103076_c0_g1_i1.p1	0.13	0.24	0	0.31	0	0.14	0	0.12	0	0	0	0	0	0.12	0	0	0	0	0	0	0.12	AT2G27680.1	0		RSP5_CHLRE	3.45e-20
TRINITY_DN10307_c0_g1_i1.p1	12.38	9.66	14.68	8.63	17.64	11.77	12.06	19.23	26.73	23.73	24.88	22.78	22.52	16.58	25.06	15.14	16.08	18.02	31.05	18.34	24.08	AT2G17630.1	0	Phosphoserine aminotransferase 2, chloroplastic [Source:UniProtKB/Swiss-Prot;Acc:Q9SHP0]	SERB2_ARATH	0
TRINITY_DN103083_c0_g1_i1.p1	0	0	0	0	0	0	0	0	0.78	0.57	0	0	0	0	0	0	0	0	0	0.35	0	ATMG00810.1	3.53e-53	Uncharacterized mitochondrial protein AtMg00810 [Source:UniProtKB/Swiss-Prot;Acc:P92519]	POLR1_ARATH	1.15e-62
TRINITY_DN10308_c0_g1_i1.p1	0.54	0	0	0	0.53	0	0.58	0	0.6	0	0	0	0	1.94	0.53	0.56	0.53	0	1.47	1.57	0.45
TRINITY_DN10308_c0_g1_i3.p1	1.36	2.12	0.92	0.84	1.11	0.93	1.61	1.33	0.73	0.52	0.94	0.64	1.22	1.53	1.38	1.76	1.09	1.15	1.05	1.08	0.92	AT4G10200.2	0		ZMYM1_HUMAN	4.54e-44
TRINITY_DN103092_c0_g1_i1.p1	0	0	0	0	0	0	0	0	0	0	0	0	0	0	0	0	0	0	0	0	0	AT5G28050.1	8.95e-90		GSDA_ARATH	8.8e-89
TRINITY_DN103098_c0_g2_i1.p1	0.4	0	0	0	0	0.42	0	0	0	0	0	0	0	0	0	0	0	0	0	0	0	AT1G09630.1	2.65e-110	Ras-related protein RABA2a [Source:UniProtKB/Swiss-Prot;Acc:O04486]	RAA2A_ARATH	2.61e-109
TRINITY_DN10309_c0_g2_i1.p1	7.73	6.11	5.22	6.39	5.86	9.56	3.85	5.32	12.5	6.68	8.45	8.78	6.77	7.39	8.05	9.21	8.94	9.14	7.62	7.8	9.9	AT5G06430.1	8.47e-67		TXLA_SYNY3	3.28e-08
TRINITY_DN1030_c0_g1_i1.p1	14.97	11.51	12.91	13.89	13.23	7.87	12.87	15.72	26.67	21.22	17.74	18.48	13.76	17.99	36.06	25.39	23.7	26.25	26.55	10.38	19.48	AT2G28250.3	1.76e-11	Receptor-like serine/threonine-protein kinase NCRK [Source:UniProtKB/Swiss-Prot;Acc:Q8VYY5]	NCRK_ARATH	1.74e-10
TRINITY_DN1030_c0_g1_i7.p1	20.58	9.41	17.27	13.64	13.62	8.83	11.96	25.86	22.74	21.41	14	19.69	13.31	19.45	33.03	27.28	31.06	32.73	31.43	19.08	19.7	AT2G28250.3	5.74e-85	Receptor-like serine/threonine-protein kinase NCRK [Source:UniProtKB/Swiss-Prot;Acc:Q8VYY5]	NCRK_ARATH	5.65e-84
TRINITY_DN103102_c0_g1_i1.p1	0.6	0	0	0.23	0.19	0.62	0.61	0	0	0	0	0	0	0	0	0	0.39	0	0.72	0	0	ATMG00710.1	1.15e-12	Uncharacterized mitochondrial protein AtMg00710 [Source:UniProtKB/Swiss-Prot;Acc:P92512]	POLX_TOBAC	1.89e-37
TRINITY_DN103102_c1_g1_i1.p1	0.36	0	0	0	0	0	0	0	0	0.29	0	0	0	0	0	0	0	0	0	0.35	0	AT4G23160.2	2.29e-56		POLX_TOBAC	1.85e-56
TRINITY_DN103104_c0_g1_i1.p1	0	0	0	0	0	0	0	0	0	0.2	1.09	0.23	0.27	0	0	0	0	0	0	0	0.45
TRINITY_DN103114_c0_g1_i1.p1	0	0	0	0	0.84	0	0	0	0	0	0	0	0.92	0	0	0	0	0	0	0	0	AT4G21310.1	1.28e-64		DEAL2_ARATH	1.26e-63
TRINITY_DN10311_c0_g2_i1.p1	34.6	36.63	33.27	52.39	34.81	31.89	35.24	49.04	52.82	44.66	56.65	44.89	50.15	45.18	60.84	49.02	55.99	47.65	58.34	39.46	46.98
TRINITY_DN103126_c0_g1_i1.p1	0.27	0.24	0.69	0	0.77	0.83	0.27	0.49	0.58	0.21	1.14	0.24	0	0	0	0.27	0.26	0.24	0.96	0.26	0.46	AT1G06740.1	9.06e-26
TRINITY_DN10312_c0_g2_i1.p2	8.93	16.06	11.02	11.28	3.08	11.07	7.7	9.31	10.16	4.87	8.97	8.78	8.55	12.78	8.5	6.24	9.64	7.52	4.54	4.03	3.97	AT5G40610.1	2.15e-29	Glycerol-3-phosphate dehydrogenase [NAD(+)] 1, chloroplastic [Source:UniProtKB/Swiss-Prot;Acc:Q9SCX9]	GPDA_CUPLA	2.49e-31
TRINITY_DN10312_c0_g2_i2.p1	8.59	7.07	8.12	6.43	5.94	9.01	5.55	6.79	9.49	9.36	9.2	7.05	8.91	7.18	5.72	6.64	8.38	6.68	5.7	3.13	5.68	AT5G40610.1	0	Glycerol-3-phosphate dehydrogenase [NAD(+)] 1, chloroplastic [Source:UniProtKB/Swiss-Prot;Acc:Q9SCX9]	GPDA_CUPLA	0
TRINITY_DN103133_c0_g1_i1.p1	0	0	0	0	0	0	0	0	0	0	0	0	0	0.27	0	0	0	0	0	0.3	0.27				POLR1_ARATH	5.03e-18
TRINITY_DN10313_c0_g2_i1.p1	19.62	22.67	24.51	18.47	9.19	8.63	12.77	15.46	16.07	15.1	20.27	10.65	9	15.78	9.32	13.92	11.17	8.84	4.18	5.42	6.6	AT1G28310.1	4.43e-37	Dof zinc finger protein DOF1.4 [Source:UniProtKB/Swiss-Prot;Acc:Q9FZA4]	DOF14_ARATH	4.36e-36
TRINITY_DN10313_c0_g4_i1.p1	1.39	1.86	1.96	1.22	2.85	1.79	0.89	1.44	5.28	2.4	4.22	1.93	2.69	1.65	2.81	4.5	2.91	3.32	1.58	1.51	2.94	AT5G65590.1	6.72e-59	Dof zinc finger protein DOF5.7 [Source:UniProtKB/Swiss-Prot;Acc:Q9LSL6]	DOF57_ARATH	6.61e-58
TRINITY_DN103147_c0_g1_i1.p1	0	0.2	0	0	0	0	0	0	0	0	0	0.42	0	0	0	0	0	0	0	0	0	AT2G22360.1	7.08e-139	Chaperone protein dnaJ A6, chloroplastic [Source:UniProtKB/Swiss-Prot;Acc:Q9SJZ7]	DJA8_ORYSJ	2.76e-177
TRINITY_DN10315_c0_g1_i4.p1	1.3	0.73	0.33	0.35	1.02	0.93	0.38	1.18	1.07	0.62	0.39	0.85	0.46	1.43	2.01	1.35	1.27	1.04	0.9	0.15	0.21	AT4G23160.2	6.03e-63		COPIA_DROME	7.69e-84
TRINITY_DN10316_c0_g2_i4.p1	9.61	7.22	7.15	4.72	7.3	8.27	8.91	10.3	9.02	8.1	8.3	7.42	10.83	9.97	15.91	11.3	10.32	8.83	13.87	8.17	7.15	AT5G61140.2	0	DExH-box ATP-dependent RNA helicase DExH14 [Source:UniProtKB/Swiss-Prot;Acc:Q9FNQ1]	DEXHE_ARATH	0
TRINITY_DN10317_c0_g3_i3.p1	3.13	4.23	4.18	3.45	3.06	2.45	3.94	3.9	4.59	5.24	2.63	3.92	3.82	4.12	5.63	6.77	6.34	7.57	6.95	5.36	4.62	AT3G14070.1	0	Cation/calcium exchanger 3 [Source:UniProtKB/Swiss-Prot;Acc:Q9LJI2]	CCX3_ARATH	0
TRINITY_DN103183_c0_g1_i1.p1	0.14	0.62	0.12	0.08	0.27	0.36	0.07	0.59	0.46	0.18	0.29	0.4	0.43	0.18	0.58	0.28	0.28	0.32	0.84	0.34	0.39	AT4G23160.2	1.69e-110		POLR2_ARATH	3.66e-77
TRINITY_DN103183_c1_g1_i1.p1	0	0	0	0	0	0	0	0	0	0	0	0	0	0.39	0	0.45	0	0	0	0	0
TRINITY_DN10318_c0_g1_i11.p1	24.56	26.82	21.23	15.23	19.82	23.84	25.75	30.71	25.52	23.27	29.29	22.76	23.22	25.85	26.2	20.57	24.24	21.6	24.56	30.38	26.65	AT4G21470.1	0	Bifunctional riboflavin kinase/FMN phosphatase [Source:UniProtKB/Swiss-Prot;Acc:Q84MD8]	FHYRK_ARATH	0
TRINITY_DN103191_c0_g1_i1.p1	10.47	16.94	13.33	7.4	43.96	56.39	35.11	52.55	41.03	22.23	10.12	72.6	68.43	43.33	60.36	50.78	49.67	74.56	111	56.41	88.96	AT2G43290.1	2.4e-38	Calmodulin-like protein 5 [Source:UniProtKB/Swiss-Prot;Acc:O22845]	CML5_ARATH	2.37e-37
TRINITY_DN103194_c0_g1_i1.p1	0	0	0	0	0	0	0	0	0	0	0	0	0	0	0	0	0	1.61	0	0.16	0	AT5G03940.1	4.87e-83	Signal recognition particle 54 kDa protein, chloroplastic [Source:UniProtKB/Swiss-Prot;Acc:P37107]	SRP54_MYCLE	2.11e-146
TRINITY_DN10319_c0_g2_i1.p1	0	0	2.79	0.02	0	0	0	0.65	2.42	0	0.91	0.74	0	0	3.25	0	0	1.48	0	0	0	AT3G15880.4	0	Topless-related protein 4 [Source:UniProtKB/Swiss-Prot;Acc:Q27GK7]	TPR4_ARATH	0
TRINITY_DN10319_c0_g2_i2.p1	8.78	8.55	3.84	5.13	7.63	5.22	6.96	7.62	9.14	9.17	8.13	7.03	10.24	9.05	10.25	14.44	13.61	10.42	15.12	9.1	6.89	AT3G15880.4	0	Topless-related protein 4 [Source:UniProtKB/Swiss-Prot;Acc:Q27GK7]	TPR4_ARATH	0
TRINITY_DN10319_c0_g2_i2.p2	36.43	36.69	32.11	30.42	31.92	36.02	36.77	27.24	37.96	27.13	36.6	33.62	42.93	32.63	33.68	37.12	38.36	37.27	42.61	51.94	50.5	AT3G55600.1	2.73e-93
TRINITY_DN10319_c1_g1_i3.p1	81.13	90.03	66.4	61.55	85.26	103.93	102.65	123.58	110.96	70.67	83.25	102.33	111.09	120.43	151.59	139.34	143.04	130.93	163.09	200.64	198.1	AT2G32260.2	1.16e-44	Choline-phosphate cytidylyltransferase 1 [Source:UniProtKB/Swiss-Prot;Acc:Q9ZV56]	CCT1_ARATH	3.52e-43
TRINITY_DN10319_c1_g1_i7.p1	25.89	27.28	24.53	16.07	22.02	31.75	29.37	36.05	41.57	24.71	21.87	32.63	30.85	37.09	50.65	45.57	51.4	48.56	61.1	54.15	76.48	AT2G32260.1	5.62e-146	Choline-phosphate cytidylyltransferase 1 [Source:UniProtKB/Swiss-Prot;Acc:Q9ZV56]	CCT1_ARATH	5.53e-145
TRINITY_DN1031_c0_g1_i1.p1	26.1	23.93	24.49	21.98	28.42	23.83	24.53	24.02	23.86	29.02	26.76	30.79	25.34	31.15	23.8	21.13	29.87	30.79	31.07	27.93	24.12	AT5G58230.1	0	Histone-binding protein MSI1 [Source:UniProtKB/Swiss-Prot;Acc:O22467]	MSI1_SOLLC	0
TRINITY_DN1031_c0_g2_i2.p1	17.1	15.8	13.63	10.83	11.63	9.59	11.61	13.37	16.09	17.93	20.16	18.2	18.8	18.32	14.67	12.8	14.17	17.75	24.77	14.6	12.82	AT5G58230.1	0	Histone-binding protein MSI1 [Source:UniProtKB/Swiss-Prot;Acc:O22467]	MSI1_SOLLC	0
TRINITY_DN1031_c0_g5_i1.p1	16.81	15.4	18.03	13.84	15.4	8.99	9.79	16.01	11.51	21.94	15.7	10.98	15.25	15.67	10.27	8.38	11.17	13.62	14.95	10.07	12.48	AT5G58230.1	9.67e-155	Histone-binding protein MSI1 [Source:UniProtKB/Swiss-Prot;Acc:O22467]	MSI1_SOLLC	5.6e-155
TRINITY_DN103204_c0_g1_i1.p1	0	0	0	0	0	0	0	0	0	0	0	0	0	0	0.15	0.15	0	0	0.69	0	2.44				GLIK_ASPFU	1.92e-26
TRINITY_DN103210_c0_g1_i1.p1	0	0	0	0.25	0	0	0	0	0.23	0	0	0	0.22	0	0.21	0	0	0	0	0	0	AT4G34040.1	7.41e-58	E3 ubiquitin-protein ligase MBR2 [Source:UniProtKB/Swiss-Prot;Acc:O49500]	HIP1_ORYSJ	0
TRINITY_DN103221_c0_g1_i1.p1	0	0	0	0	0	0	0.22	0	0.23	0	0	0	0	0	0	0	0.21	0	0	0	0	AT4G21150.2	2.17e-101	Dolichyl-diphosphooligosaccharide--protein glycosyltransferase subunit 2 [Source:UniProtKB/Swiss-Prot;Acc:Q93Z16]	RPN2_ORYSJ	0
TRINITY_DN103226_c0_g2_i1.p1	0	0	0.72	0	0	0	0	0	0	0	0	0	0.45	0	0.83	0	0	0	0	0	0
TRINITY_DN103232_c0_g1_i1.p1	0	0	0	0	0.47	0.52	0	0	0	0	0	0	0	1.29	0.48	0	0	0.44	0.87	0	0
TRINITY_DN103235_c0_g1_i1.p1	1.3	1.03	2.35	0.9	1.99	2.51	2.37	3.45	1.4	3.69	2.7	1.92	1.73	3.23	3.28	3.85	4.2	5.43	5.05	4.14	4.64	AT2G29410.1	1.23e-57	Metal tolerance protein B [Source:UniProtKB/Swiss-Prot;Acc:Q6DBM8]	MTPB_ARATH	1.21e-56
TRINITY_DN103241_c0_g1_i1.p1	0.61	0	0	0	0	0.32	0.31	0	0	0	0.33	0	0	0	0	0.31	0	0	0	0.88	0	AT1G58410.1	1.68e-13	Probable disease resistance protein RXW24L [Source:UniProtKB/Swiss-Prot;Acc:Q9C646]	R1A6_SOLDE	9.58e-24
TRINITY_DN103245_c0_g1_i1.p2	0	0	0	0.39	0	0	0	0	0	0	0	0	0	0.29	0	0	0	0	0	0	0	AT3G04550.1	2.09e-45	Rubisco accumulation factor 2, chloroplastic [Source:UniProtKB/Swiss-Prot;Acc:Q9SR19]	RAF1_ORYSJ	5.81e-100
TRINITY_DN103248_c0_g1_i1.p1	0	0	0	0	0	0.36	0	0	0	0	0	0	0	0	0	0	0	0	0	0	0.88	AT3G52180.4	2.46e-83	Phosphoglucan phosphatase DSP4, chloroplastic [Source:UniProtKB/Swiss-Prot;Acc:Q9FEB5]	DSP4_CASSA	1.51e-94
TRINITY_DN10324_c0_g1_i1.p1	2.09	0.81	0.77	0.71	0.58	0	0.93	1.11	0.33	1.19	0.32	0.27	1.57	1.83	1.79	1.21	0.88	1.35	0.27	0	0.52
TRINITY_DN10325_c0_g2_i2.p1	0.14	0.62	0.49	0.16	0.14	0.14	0.57	0.52	0.46	0.69	0.88	0.13	0.14	0.36	0	0.28	0.14	0.26	0	0.14	0.13	AT5G54160.1	5.83e-117	Flavone 3'-O-methyltransferase 1 [Source:UniProtKB/Swiss-Prot;Acc:Q9FK25]	COMT1_POPTM	1.11e-121
TRINITY_DN10325_c0_g4_i1.p1	0	1.93	2.6	0.34	1.94	0.46	1.14	0.36	1.41	1.54	2.33	0	1.55	0.42	0.48	1.13	1.15	0.54	0.65	0.21	1.3	AT3G07080.1	3.74e-100		S35F5_BOVIN	2.8e-06
TRINITY_DN10325_c0_g4_i2.p1	3.68	3.63	3.54	3.11	1.86	3.57	2.3	4.28	4.66	2.37	4.11	3.07	2.46	2.56	1.67	5.26	3.39	3.18	4.73	2.53	3.96	AT3G07080.1	3.83e-118		S35F5_PONAB	2.04e-12
TRINITY_DN103260_c0_g2_i1.p1	3.55	2.3	5.09	4.22	2.42	2.56	3.02	5.73	4.84	5.12	4.83	2.53	2.76	3.44	0.57	1.2	1.74	1.79	0.76	0.9	0.84	AT1G22710.1	1.06e-178	Sucrose transport protein SUC2 [Source:UniProtKB/Swiss-Prot;Acc:Q39231]	SUT_SPIOL	0
TRINITY_DN103269_c0_g1_i1.p1	0	0	0	0	0.28	0	0	0	0	0.23	0	0	0	0	0.29	0	0	0	0	0	0	AT1G30900.1	6.53e-108	Vacuolar-sorting receptor 6 [Source:UniProtKB/Swiss-Prot;Acc:Q9FYH7]	VSR6_ARATH	6.42e-107
TRINITY_DN10326_c0_g1_i3.p1	2.26	4.14	2.6	4.05	13.55	17.19	10.28	38.35	15.3	18.2	6.66	38.49	49.49	20.65	34.93	19.63	22.68	34.51	63.33	34.67	28.58	AT2G38100.2	1.48e-34	Protein NRT1/ PTR FAMILY 5.5 [Source:UniProtKB/Swiss-Prot;Acc:O80436]	PTR29_ARATH	2.16e-33
TRINITY_DN103271_c0_g1_i1.p1	0.43	0.42	0.05	0.12	0.15	0.16	0.37	0.53	0.34	0.22	0	0	0.11	0.41	0.32	0.52	0.31	0.29	0.34	0.05	0.1	AT4G23160.2	1.57e-104		POLX_TOBAC	0
TRINITY_DN10328_c0_g1_i2.p1	2.56	2.03	2.49	2.28	0.62	2.02	0.33	1.49	1.75	1.53	0.7	0.58	1.69	1.4	2.88	2.92	3.15	0.87	2.9	2.17	1.67
TRINITY_DN10328_c0_g1_i7.p1	1.19	1.02	0.64	2.23	0	0	0	1.74	0	0	0.41	0.67	0	0.99	2.61	0	0.37	0	2.03	0	0
TRINITY_DN10328_c0_g1_i9.p1	0.86	0	0	0	0	3.03	0	0	1.04	0.37	0	0	1.53	0	0	0	0	0.42	0	0	0.4
TRINITY_DN10328_c0_g3_i1.p1	0.71	1.63	0.62	0.42	1.04	2.26	1.87	2.99	1.96	1.7	1.57	4.17	4.18	2.2	2.49	2.91	0.35	2.59	3.56	1.38	1.54
TRINITY_DN10330_c0_g1_i1.p1	2.89	1.51	3.55	0.49	1.6	0.88	1.74	1.54	4.07	6.17	2.29	2.57	1.33	2.56	3.27	2.66	3.45	4.48	2.99	1.99	1.93	AT2G47990.1	1.8e-60	Protein SLOW WALKER 1 [Source:UniProtKB/Swiss-Prot;Acc:O82266]	SWA1_ARATH	1.77e-59
TRINITY_DN103328_c0_g1_i2.p1	0.18	0.24	0.16	0.21	0.17	0.27	0.09	0.33	0.58	0.66	0.84	0.42	0.55	0.08	0.36	0.35	0.09	0.16	1.22	0.26	0.32	AT3G45660.1	5.44e-178	Protein NRT1/ PTR FAMILY 2.6 [Source:UniProtKB/Swiss-Prot;Acc:Q9M1E1]	PTR38_ARATH	5.35e-177
TRINITY_DN10332_c0_g1_i2.p1	0.53	1.96	6.78	3.18	1.03	3.41	2.24	3.46	5.81	3.27	1.8	0.46	2.3	3.77	2.07	3.28	1.04	2.37	2.86	3.56	1.77	AT5G06760.1	7.54e-21		LEA46_ARATH	7.41e-20
TRINITY_DN103361_c0_g1_i1.p1	0	0	0.46	0.65	0	0	0	0	0	0	0	0	0	0	0	0	0	0.49	0	0	0	AT4G30360.1	1.41e-91	Cyclic nucleotide-gated ion channel 17 [Source:UniProtKB/Swiss-Prot;Acc:Q8L7Z0]	CNG17_ARATH	1.39e-90
TRINITY_DN103375_c0_g2_i1.p1	0	0.84	0	0.55	0	0	0	0.85	0	0	1.02	0	0	0	0	0	0	0	0	0	0	AT1G34355.1	2.84e-39	FHA domain-containing protein PS1 [Source:UniProtKB/Swiss-Prot;Acc:B7SY83]	PS1_ARATH	2.79e-38
TRINITY_DN103379_c0_g1_i1.p1	0	0	0	0	0	0	0	0	0	0	0	0	0	0	0	0	0	0	0	0	0	AT5G25400.1	1.86e-91	Probable sugar phosphate/phosphate translocator At5g25400 [Source:UniProtKB/Swiss-Prot;Acc:Q3E6T0]	PT525_ARATH	1.82e-90
TRINITY_DN10337_c0_g1_i1.p1	7.4	9.07	11.6	9.09	9.04	8.12	9.02	10.22	10.22	13.44	12.02	9.29	10.32	10.53	11.37	12.4	14.06	14.54	12.44	8.27	8.01	AT2G15820.1	0	Pentatricopeptide repeat-containing protein At2g15820, chloroplastic [Source:UniProtKB/Swiss-Prot;Acc:Q9XIL5]	PP154_ARATH	0
TRINITY_DN103394_c0_g1_i1.p1	0.24	0	0.21	0	0	0.25	0	0	0	0.39	0	0	0.25	0.21	0	0	0	0	0	0	0	AT4G23160.2	5.55e-69		POLR1_ARATH	9.2e-49
TRINITY_DN103397_c0_g1_i1.p1	3.34	1.61	1.55	0.3	0.5	1.6	2.65	0.47	0.28	1.65	0.55	0.7	1.07	0.22	0	0.77	0.76	0.47	0.23	0	0.23	AT1G66140.1	1.79e-39	Zinc finger protein 4 [Source:UniProtKB/Swiss-Prot;Acc:Q39263]	ZFP4_ARATH	1.76e-38
TRINITY_DN1033_c0_g1_i12.p2	0	0	0	0.37	0.3	0.65	0.32	1.73	0.68	0	0	1.4	0.98	0.82	9.92	5.02	4.27	3.38	13.5	8.4	20.5	AT1G12020.1	3.71e-32
TRINITY_DN1033_c0_g1_i17.p1	515.7	711.78	308.14	126.43	91.53	190.67	512	910.38	925.39	252.39	197.76	162.19	356.35	805.75	955.52	1036.74	424.6	143.35	45.68	166.95	544.89	AT4G30210.2	5.28e-180	NADPH--cytochrome P450 reductase 2 [Source:UniProtKB/Swiss-Prot;Acc:Q9SUM3]	NCPR_CATRO	0
TRINITY_DN103404_c0_g1_i1.p1	0	0	0	0	0.86	0	0	0	0	0	0	0	0	0	0	0	0	0	0	0	0	AT2G33330.1	9.2e-48	Cysteine-rich repeat secretory protein 11 [Source:UniProtKB/Swiss-Prot;Acc:O22784]	PDLP3_ARATH	9.05e-47
TRINITY_DN103414_c0_g1_i2.p1	0	0	0	0	0	0	0	0.19	0	0	0	0	0	0	0	0	0	0	0	0	0	AT1G04710.1	1.22e-129	3-ketoacyl-CoA thiolase 1, peroxisomal [Source:UniProtKB/Swiss-Prot;Acc:Q8LF48]	THIK1_ARATH	1.2e-128
TRINITY_DN103420_c0_g1_i1.p1	0.56	0	0.48	0	2.2	0.61	0	1.59	0	0.44	1.29	0.49	3.09	2.03	2.21	0	0.55	3.04	5.1	1.63	0.47
TRINITY_DN10342_c0_g3_i3.p1	3.37	6.49	3.87	1.44	5.08	6.73	1.57	7.32	2.45	4.73	5.36	7.81	3.59	10.56	11.53	9.15	8.9	10.04	3.84	7.39	10.81	AT4G05460.1	6.04e-41	F-box protein SKIP19 [Source:UniProtKB/Swiss-Prot;Acc:Q9M0U9]	SKI19_ARATH	5.94e-40
TRINITY_DN10342_c0_g4_i2.p1	3.03	5.17	6.52	5.35	3.45	3.28	1.62	3.33	7.82	7.48	6.9	3.84	3.3	5.43	7.49	6.29	6.9	7.93	8.11	10.06	8.72	AT4G05460.1	1.32e-48	F-box protein SKIP19 [Source:UniProtKB/Swiss-Prot;Acc:Q9M0U9]	SKI19_ARATH	1.3e-47
TRINITY_DN10342_c1_g1_i1.p1	1.97	3.67	2.55	5.35	2.4	2.13	3.67	3.71	7.62	4.62	5.59	4.34	6.97	6.17	7.31	2.55	8.27	9.8	9.4	8.59	9.6	AT4G05460.1	3.04e-25	F-box protein SKIP19 [Source:UniProtKB/Swiss-Prot;Acc:Q9M0U9]	FBL23_ARATH	1.06e-26
TRINITY_DN10344_c0_g1_i1.p1	2.35	1.5	1.2	1.98	1.74	1.19	1.62	0.78	1.73	1.3	1.88	1.49	0.65	1.83	2.05	1.89	2.2	2.52	1.64	2.06	1.82	AT2G28480.1	7.48e-119		Y3544_ARATH	1.78e-39
TRINITY_DN103452_c0_g1_i1.p1	0	0	0	0.46	0	0	0	0	0	1.53	1.72	0	0	0.69	0	0	0	0	0	0	0	AT3G10600.1	3.56e-69	Cationic amino acid transporter 7, chloroplastic [Source:UniProtKB/Swiss-Prot;Acc:Q9SQZ0]	CAAT7_ARATH	3.51e-68
TRINITY_DN103453_c0_g2_i1.p1	0	0	0	0	0	0	0	0	0	0	0	0	0	0	0	0.24	0	0	0	0	0.21	AT5G14260.2	1.79e-135		RBCMT_ARATH	1.63e-09
TRINITY_DN103454_c0_g1_i1.p1	0	0	0.3	0	0.68	0	0	0	0	0	0	0	0	0	0	0	0	0	0	0	0	AT1G10000.1	4.03e-14
TRINITY_DN103456_c0_g1_i1.p1	0	0	0	0	0	0	0.25	0	0	0	0	0	0.26	0	0	0.74	0	0	0	0	0	AT5G48050.1	8.89e-08		POLR1_ARATH	1.36e-09
TRINITY_DN10345_c0_g1_i4.p1	3.87	3.42	5.25	4.52	4.5	2.91	3.83	5.36	4.74	4.59	6.12	5.15	5.39	3.92	5.08	4.99	5.86	6.33	6.16	3.55	4.3	AT1G65070.2	0		MUTS2_SYNY3	3.79e-116
TRINITY_DN10346_c0_g1_i2.p1	6.59	7.29	5.16	4.15	5.25	6.86	5.87	8.6	6.83	7.08	6.79	7.13	8.17	7.76	10.64	7.8	9.66	9.53	13.53	8.5	6.4	AT1G79350.1	0		FGT1_ARATH	0
TRINITY_DN10346_c0_g5_i1.p1	1.89	0.34	0.33	0.45	0.73	0	1.98	0.7	0.41	0.6	2.5	1.01	0.4	2.66	1.5	2.69	0.74	2.39	1.71	0.36	0.32
TRINITY_DN103475_c0_g1_i1.p1	0	0	0	0	0	0	0.45	0.8	0	0	0.47	0	0	0	0	0	1.68	0.38	0	0.41	0.36	AT5G50080.2	9.31e-20	Ethylene-responsive transcription factor ERF110 [Source:UniProtKB/Swiss-Prot;Acc:Q70II3]	EF110_ARATH	9.26e-19
TRINITY_DN10347_c0_g1_i1.p1	2.64	2.79	3.93	0.85	2.08	3.48	1.23	5.32	1.83	3.08	3.33	3.06	2.75	3.54	1.69	2.64	3.77	4.14	3.69	6.49	2.32	AT1G21280.1	5.64e-34
TRINITY_DN103480_c0_g1_i1.p1	0	0	0	0	0	0	0	0	0	0	0	0	0	0	0	0	0	0	0	0	0.76
TRINITY_DN103484_c0_g1_i1.p1	0	0	0	0	0	0	0	0	0	0	0	0	0	0	0	0	0	0.9	0.6	0	0				AHPF_PSEAE	6.5e-66
TRINITY_DN103488_c0_g1_i1.p1	0.49	0	0	0	0	0	0	0	0	0	0	0	0	0	0.96	0	0	0	0	0	0
TRINITY_DN1034_c0_g1_i1.p1	11.07	34.4	34.17	11.07	57.24	108.21	61.54	124.91	96.8	74.04	44.78	130.56	143.52	115.84	157.12	92.54	112.78	124.68	221.35	165.75	171.99	AT4G22330.1	6.9e-150		ACER_ARATH	6.79e-149
TRINITY_DN1034_c0_g2_i1.p1	13.9	10.55	9.76	8.86	14.31	16.61	15.02	13.71	10.24	16.1	12.83	18.5	13.25	17.6	18.22	8.03	13.43	16.68	20.28	21.63	14.51	AT4G22330.1	4.39e-148		ACER_ARATH	4.32e-147
TRINITY_DN1034_c1_g1_i1.p1	6.65	6.41	5.77	3.54	6.4	6.37	6.52	8.83	6.82	7.01	6.98	6.2	9.66	7.6	9.98	7.58	8.5	7.68	12.73	7.14	4.92	AT2G26780.2	0		ECM29_HUMAN	0
TRINITY_DN1034_c1_g1_i12.p2	0.84	0.4	1.57	0.77	1.16	2	2.68	1.92	1.97	1.91	2.2	0.73	3.77	3.34	2.04	2.81	2.53	2.17	4.67	1.46	1.21	AT2G26780.1	1.51e-95		ECM29_MOUSE	1.99e-25
TRINITY_DN1034_c2_g1_i1.p1	144.09	137.28	144.14	91.54	97.06	132.07	122.26	185.39	219.93	137.04	110.35	171.33	153.93	197.4	375.92	318.47	340	321.84	391.64	333.92	373.8	AT3G51440.1	2.03e-129	Protein STRICTOSIDINE SYNTHASE-LIKE 6 [Source:UniProtKB/Swiss-Prot;Acc:Q9SD05]	SSL6_ARATH	2e-128
TRINITY_DN1034_c2_g1_i3.p1	1.92	1.58	1.22	0.15	1.35	1.7	2.86	3.05	4.84	1.25	0.4	4.28	3.54	1.98	11.92	8.23	9.93	11.06	23.88	19.42	15.81	AT3G51430.1	4.73e-142	Protein STRICTOSIDINE SYNTHASE-LIKE 5 [Source:UniProtKB/Swiss-Prot;Acc:Q9CAZ7]	SSL5_ARATH	4.66e-141
TRINITY_DN10350_c0_g2_i1.p1	6.21	3.66	5.32	3.42	4.92	6.12	4.85	7.31	8.29	7.38	6.61	5.9	7.78	7.3	13.9	10.47	10.29	10.01	16.48	12.48	12.35	AT1G77800.2	8.22e-134		JADE3_HUMAN	7.58e-26
TRINITY_DN10351_c0_g1_i1.p1	0	0.32	0.76	0	0.41	0.91	2.6	1.19	2	0	0.26	2.01	0	1.91	0	1.99	0.87	4.27	1.4	0	0.88	AT5G46860.1	8.05e-114	Syntaxin-22 [Source:UniProtKB/Swiss-Prot;Acc:P93654]	SYP22_ARATH	7.92e-113
TRINITY_DN10351_c0_g1_i4.p1	0.61	0.98	0	0	0.9	0	0	0.3	0.2	0.73	0	0	0	0	1.21	0.81	0	0	0	0.55	0	AT5G46860.1	6.94e-67	Syntaxin-22 [Source:UniProtKB/Swiss-Prot;Acc:P93654]	SYP22_ARATH	6.83e-66
TRINITY_DN10351_c0_g1_i6.p1	0	0.41	0	3.3	0	0	1.18	0.26	0	0	0.51	0	1.6	0	0	2.13	0	0.84	0	2.99	2.11	AT5G46860.1	2.38e-102	Syntaxin-22 [Source:UniProtKB/Swiss-Prot;Acc:P93654]	SYP22_ARATH	2.34e-101
TRINITY_DN103523_c0_g1_i3.p1	1.99	2.93	2.89	3.24	3.55	2.93	2.1	2.4	5.26	3.17	4.39	5.05	4.5	2.62	3.48	6.67	9.21	10.85	14.05	7.33	5.36	AT4G37370.1	4.8e-164		CYQ32_CATRO	5.51e-172
TRINITY_DN10352_c0_g1_i1.p1	26.52	27.45	22.59	11.44	24.62	18.2	33.83	27.02	24.88	21.28	18.87	28.01	27.21	30.23	42.45	38.79	32.52	35.2	55.19	55.98	47.33	AT3G05010.1	9.36e-137		CAND2_ARATH	9.21e-136
TRINITY_DN103546_c0_g1_i1.p1	0	0	0	0	0	0	0	0	0	0	0	0.27	0	0	0	0	0	0	0	0	0	AT5G02810.2	9.28e-10	Two-component response regulator-like APRR7 [Source:UniProtKB/Swiss-Prot;Acc:Q93WK5]	PRR37_ORYSJ	1.55e-95
TRINITY_DN103547_c0_g1_i1.p1	0.4	0	0	0	0	0	0	0	0	0.31	0.44	0	0	0	0	0	0	0	0	0.38	0
TRINITY_DN103549_c0_g1_i1.p1	0.91	0.42	2.35	6	4.86	1.95	0.96	1.7	2.5	3.92	4.08	3.22	1.47	2.83	0.45	0.94	4.03	4.52	2.89	3.08	3.86	AT1G76290.1	1.17e-21	Probable acyl-activating enzyme 21 [Source:UniProtKB/Swiss-Prot;Acc:Q9SFW5]	CCL2_HUMLU	1.24e-23
TRINITY_DN103555_c0_g1_i1.p1	0	0	0	0	0	0	0	0	0	0	0	0	0	0	0	0	0	0	0	0	0	AT4G17140.1	3.8e-69
TRINITY_DN10355_c0_g1_i1.p1	6.58	11.48	8.09	4.29	5.03	14.73	11.12	31.25	29.05	7.97	9.27	24.97	20.53	29.04	46.45	56.54	41.04	43.86	74.7	58.48	75.97	AT2G16890.2	2.31e-165	UDP-glycosyltransferase 90A1 [Source:UniProtKB/Swiss-Prot;Acc:Q9ZVX4]	U90A1_ARATH	2.27e-164
TRINITY_DN103563_c0_g1_i1.p1	0	0	0	0	0	0	0	0	0	0	0	0	0	0	0	0	0.09	0	0.33	0	0.57	AT2G31030.1	4.99e-31	Oxysterol-binding protein-related protein 1B [Source:UniProtKB/Swiss-Prot;Acc:Q8S8P9]	YEH1_SCHPO	7.28e-46
TRINITY_DN103566_c0_g3_i1.p1	0.62	0.22	0.43	1.31	0.96	0.38	0.89	0.92	0.67	0.81	0.65	0.93	1.02	1.07	0.88	2.22	1.23	1.82	0.9	0.36	0.45	AT4G23160.2	1.54e-32		POLX_TOBAC	4.36e-60
TRINITY_DN103566_c0_g3_i1.p2	0.82	1.2	0.94	0.32	0.65	0.97	0.83	1.12	0.88	1.22	0.57	0.63	1.67	1.17	1.65	1.88	2.4	1.85	1.23	0.13	0.85	AT5G48050.1	5.72e-32		POLX_TOBAC	1.88e-13
TRINITY_DN103566_c0_g3_i1.p3	0.47	1.67	1.81	1.91	0.9	0.97	1.92	0.65	2.02	0.75	0.75	1.7	1.45	1.82	2.57	2.8	3.2	2.54	1.69	0.23	0.41	AT4G23160.2	3.65e-56		POLR2_ARATH	4.3e-74
TRINITY_DN10356_c0_g4_i1.p1	62.13	61.15	67.05	39.82	64.37	68.03	70.39	76.38	69.23	59.95	57.33	67.59	79.52	78.85	171.2	153.18	142.19	146.27	199.38	166.03	183.73	AT2G14910.1	1.36e-124
TRINITY_DN10357_c0_g2_i7.p1	248.78	238.94	249.74	177.82	227.61	236.83	233.78	268.5	225.09	275.42	257.23	233.75	283.69	268.06	292.93	275.01	273.58	255.97	240.9	199.54	179.15	AT5G64940.2	0		AB1K8_ARATH	0
TRINITY_DN10358_c0_g1_i3.p1	0	0	0	0	0	0	0	0	0	0	0.7	0	0.67	0	0.59	0	0.6	0	0	0	0	AT4G23160.2	1.03e-45		POLR2_ARATH	4.76e-45
TRINITY_DN10359_c0_g1_i10.p1	29.28	21.89	31.83	24.22	32.56	32.21	36.17	36.84	36.93	43.99	38.51	42.84	38	36.69	40.71	41.29	47.49	50.11	62.57	57.88	61.75	AT1G67070.2	5.49e-173	Mannose-6-phosphate isomerase 2 [Source:UniProtKB/Swiss-Prot;Acc:Q9FZH5]	MPI2_ARATH	5.4e-172
TRINITY_DN10359_c0_g1_i4.p1	0	2.52	1.89	1.4	1.08	3.23	1.23	2.81	5.3	0.99	4.67	3.36	1.12	2.22	2.57	2.43	1.32	1.11	6.34	1.21	2.75	AT1G67070.3	5.07e-42	Mannose-6-phosphate isomerase 2 [Source:UniProtKB/Swiss-Prot;Acc:Q9FZH5]	MPI1_ARATH	4.47e-40
TRINITY_DN1035_c0_g1_i13.p1	1.69	4.45	2.75	1.84	4.09	4.44	4.71	5.27	6.21	4.7	3.18	3.97	4.55	6.11	10.06	6.36	5.74	5.6	10.42	7.96	7.4	AT3G26000.1	4.88e-93	F-box protein SKIP14 [Source:UniProtKB/Swiss-Prot;Acc:Q9LU91]	SKI14_ARATH	4.8e-92
TRINITY_DN1035_c0_g1_i4.p1	15.61	15.67	15.07	7.53	14.31	18.97	20.14	25.17	21.13	15.43	13.96	15.49	24.8	28.77	40.79	38.02	32.57	26.21	45.96	28.67	36.15	AT3G26000.1	1.46e-77	F-box protein SKIP14 [Source:UniProtKB/Swiss-Prot;Acc:Q9LU91]	SKI14_ARATH	1.44e-76
TRINITY_DN103600_c0_g1_i1.p1	0	0	0	0	0.99	0	0	0	0	0	0	0	0	0	0	0	0	0	0	0.98	0	AT3G05850.1	2.23e-10
TRINITY_DN103601_c0_g1_i1.p1	0	0	0	0	0	0	0	0	0	0	0	0.2	0	0	0	0	0	0	0	0	0.39	AT1G64140.1	2.97e-113		WRK19_ARATH	2.94e-70
TRINITY_DN103610_c0_g1_i2.p1	0	0	0.34	0.47	0.38	0.42	0	1.1	0	0	0	0	0	0.69	0	0	0	0.35	0	0	0	ATMG00810.1	1.54e-37	Uncharacterized mitochondrial protein AtMg00810 [Source:UniProtKB/Swiss-Prot;Acc:P92519]	POLR1_ARATH	4.25e-45
TRINITY_DN10362_c0_g1_i1.p1	1385.88	1247.78	1431.43	1486.77	1564.14	1337.36	1197.95	1326.61	1248.67	1877.88	1816.54	1510.77	1243.54	1171.01	1319.63	1584.35	1850.42	2021.4	1179.01	1380.04	1192.12	AT1G76080.1	2.64e-143	Thioredoxin-like protein CDSP32, chloroplastic [Source:UniProtKB/Swiss-Prot;Acc:Q9SGS4]	CDSP_ARATH	2.59e-142
TRINITY_DN10363_c0_g1_i11.p1	32.85	36.42	38.19	28.27	38.19	46.39	39.23	46.12	47.84	42.81	37.67	44.62	49.95	53.43	50.53	57.39	52.42	45.89	44.45	55.96	45.3	AT4G22200.1	0	Potassium channel AKT2/3 [Source:UniProtKB/Swiss-Prot;Acc:Q38898]	AKT2_ARATH	0
TRINITY_DN103647_c0_g1_i1.p1	0	0	0.42	0	0	0	0	0.46	0	0	0	0	0	0.44	2.44	0	0	0	0.45	0.48	0
TRINITY_DN103649_c0_g1_i1.p1	0	0	0	0.39	0	0	0	0	0	0	0	0	0	0	0	0.33	0	0	0	0	0.28	AT1G56500.2	1.14e-66		SOQ1_ARATH	1.97e-65
TRINITY_DN10364_c0_g1_i2.p1	0.79	0.98	1.66	1.83	2.44	2.27	1.22	1.87	2.87	2.95	1.58	2.79	1.6	1.56	3.19	2.33	1.76	2.66	4.65	3.23	2.31	AT1G65810.1	0		MAA3_ARATH	3.25e-42
TRINITY_DN10364_c0_g1_i3.p1	0.91	0.81	0.92	1.59	1.46	1.4	0.31	1.53	0.49	1.11	0.95	1.26	0.62	1.18	0.61	0.9	1.19	1.93	1.92	0.88	0.81	AT1G65810.3	1.81e-110		YGSA_SCHPO	6.01e-37
TRINITY_DN10364_c0_g1_i7.p1	0.6	0.23	1.33	1.23	1.08	1.55	1.21	0.49	1.22	1.58	1.3	1.31	1.48	0.8	0.41	0.59	0.59	0.73	0.96	0.96	0.3	AT1G65810.1	0		MAA3_ARATH	1.64e-52
TRINITY_DN103651_c0_g2_i1.p1	0	0.31	0	0	0	0	0	0	0.37	0	0	0	0	0	0	0	0	0	0	0	0	AT3G26720.4	4.39e-103	Alpha-mannosidase At3g26720 [Source:UniProtKB/Swiss-Prot;Acc:P94078]	MANA1_ARATH	9.73e-102
TRINITY_DN10365_c0_g2_i10.p1	50.85	55.88	61.78	50.98	55.28	57.58	61.58	63.29	50.45	66.28	70.85	54.72	51.91	53.9	45.78	48.49	49.65	53.2	40.86	45.61	38.51	AT1G66430.1	0	Probable fructokinase-6, chloroplastic [Source:UniProtKB/Swiss-Prot;Acc:Q9C524]	SCRK6_ARATH	0
TRINITY_DN10365_c0_g3_i1.p1	0	0	0	0	0	0.45	0.45	0.4	0	0	0	0	0	0	0.42	0	0.42	0.77	0	0	0	ATMG00810.1	2.88e-42	Uncharacterized mitochondrial protein AtMg00810 [Source:UniProtKB/Swiss-Prot;Acc:P92519]	POLR1_ARATH	6.75e-47
TRINITY_DN103668_c0_g1_i1.p1	0	0.44	0	0.57	0.46	0	0.5	0	0	0	0	0	0	0	0	0	0	0	0	0	0	AT3G63470.1	1.75e-79	Serine carboxypeptidase-like 40 [Source:UniProtKB/Swiss-Prot;Acc:Q0WRX3]	SCP40_ARATH	1.72e-78
TRINITY_DN10366_c0_g1_i1.p1	249.21	289.94	280.86	228.37	227.17	249.58	249.25	316.04	306	358.87	399	311.41	361.61	327.55	296.2	305.99	313.1	327	304.51	306.25	239.64	AT4G27990.1	3.1e-49	YlmG homolog protein 1-2, chloroplastic [Source:UniProtKB/Swiss-Prot;Acc:Q9SUE0]	YMG12_ARATH	3.05e-48
TRINITY_DN103676_c0_g1_i1.p1	0	0.17	0.16	0	0.18	0	0	0	0	0	0	0	0.2	0	0	0.19	0	0	0.17	0	0	AT2G02650.1	2.13e-15		RNHX1_ARATH	2.15e-10
TRINITY_DN103681_c0_g1_i3.p1	0	0.77	0.6	0	0.5	0.72	3.38	0.8	0.38	0.71	0.37	0.32	1.08	2.56	7.73	1.91	2.05	1.11	4.71	7.57	6.93	AT4G18170.1	7.87e-54	Probable WRKY transcription factor 28 [Source:UniProtKB/Swiss-Prot;Acc:Q8VWJ2]	WRK28_ARATH	7.74e-53
TRINITY_DN103681_c0_g3_i1.p1	0	0	0	0	0	0	0	0	0	0	0	0	0	0	0	0.83	0	0.37	0.78	0	0.42
TRINITY_DN103688_c0_g1_i1.p1	0	0	0	0	0	0	0	0	0	0	0	0	0	0	0	0.1	0.1	0	0.54	0	0.72	AT4G14680.1	1.16e-27	ATP-sulfurylase 3, chloroplastic [Source:UniProtKB/Swiss-Prot;Acc:O23324]	MET3_PHANO	0
TRINITY_DN10368_c0_g2_i11.p1	1.28	0.54	1.26	0.96	0.57	0.96	0.79	1.48	1.69	1.75	2.35	1.18	1.17	2.1	1.65	0.93	1.54	1.53	1.98	1.03	1.52	AT3G61520.1	0	Pentatricopeptide repeat-containing protein At3g61520, mitochondrial [Source:UniProtKB/Swiss-Prot;Acc:Q9M316]	PP292_ARATH	0
TRINITY_DN10368_c0_g2_i8.p1	0.86	1.09	0	0.29	0.26	0	0.85	0	0	0	0	0.3	0.29	0	0	0	0	0	0	0	0
TRINITY_DN1036_c0_g1_i14.p1	28.38	28.88	25.18	21.84	25.92	28.56	24.35	47.94	30.52	43.28	41.34	40.31	42.65	43.47	56.17	49.46	44.34	49.02	52.28	44.13	33.87	AT2G39670.1	0		RLMN_SYNJA	1.38e-131
TRINITY_DN10370_c0_g2_i1.p1	3.99	1.08	0.45	1.01	3	2.85	4.78	1.91	0.75	3.93	1.83	1.76	2.68	2.39	0	0	0	0	0	0	0	AT4G12690.2	1.36e-80
TRINITY_DN10370_c0_g4_i1.p1	35.69	18.83	24.39	9.82	17.53	15.09	13.42	13.46	16.67	13.27	11.93	7.3	8.87	6.18	0.34	1.06	1.55	0.83	0.15	0.48	0.37	AT5G16370.1	0	Probable acyl-activating enzyme 5, peroxisomal [Source:UniProtKB/Swiss-Prot;Acc:Q9FFE6]	CCL11_HUMLU	0
TRINITY_DN103714_c0_g1_i1.p1	0	0	0	0	0	0	0	0	0	0	0	0	0	0	0	0	0	1.27	0.64	0	0
TRINITY_DN103718_c0_g1_i1.p1	0.71	0	0	0	0.17	0.18	0	0	0	0	0	0	0	0	0	0	0	0	0	0	0	AT5G60150.1	2.82e-26
TRINITY_DN103718_c0_g2_i1.p1	0.41	0.38	0	0	0	0	0.43	0	0	0	0	0	0	0	0	0	0	0	0	0	0
TRINITY_DN103723_c0_g2_i1.p1	0	0	0	0	0	0.43	0.42	0.37	0	0	0	0	0.43	0	0	0	0	0	0	0	0	AT1G34070.1	7.39e-10
TRINITY_DN103734_c0_g1_i1.p1	0	0	0	0	0.4	0.21	1.06	0	0	0	0	0	0	0	0	0	0	0	0	0	0	AT3G42640.1	2.35e-143	ATPase 8, plasma membrane-type [Source:UniProtKB/Swiss-Prot;Acc:Q9M2A0]	PMA8_ARATH	2.31e-142
TRINITY_DN10373_c0_g1_i10.p1	11.41	10.14	12.6	8.33	9.12	12.8	10	12.58	16.76	12.58	12.73	10.87	14.56	14.69	17.16	16.31	18.23	16.84	19.84	15.2	12.31	AT1G17720.2	0	Serine/threonine protein phosphatase 2A 55 kDa regulatory subunit B beta isoform [Source:UniProtKB/Swiss-Prot;Acc:Q39247]	2ABB_ARATH	0
TRINITY_DN10373_c0_g1_i2.p1	1.96	3.61	3.65	3.35	3.46	3.82	1.58	3.92	4.06	2.86	6.15	2.32	5.48	4.06	4.43	4.36	4.6	2.47	6.53	5.04	3.44	AT1G17720.2	1.61e-148	Serine/threonine protein phosphatase 2A 55 kDa regulatory subunit B beta isoform [Source:UniProtKB/Swiss-Prot;Acc:Q39247]	2ABB_ARATH	7.58e-146
TRINITY_DN10373_c0_g1_i3.p1	11.82	12.12	10.44	8.75	9.44	11.55	10.72	14.29	15.05	11.42	12.34	11.33	10.74	12.57	16.2	17.53	13.51	16.29	20.3	18.49	16.49	AT1G17720.1	0	Serine/threonine protein phosphatase 2A 55 kDa regulatory subunit B beta isoform [Source:UniProtKB/Swiss-Prot;Acc:Q39247]	2ABB_ARATH	0
TRINITY_DN10374_c0_g3_i3.p1	2.07	1.45	0.89	0	2.02	2.81	2.77	3.42	0	1.21	0	1.82	3.4	0.47	2.05	1.62	1.54	0.94	1.41	5.02	3.5
TRINITY_DN10374_c0_g3_i3.p2	3.62	6.84	1.04	0.74	4.73	2.65	7.17	4	1.34	5.59	0.7	1.05	8.69	4.37	11.85	3.8	4.77	4.9	3.84	12.86	3.52
TRINITY_DN10374_c1_g1_i2.p1	0.45	2.1	0.78	1.64	0.88	1.95	1.92	3.41	1.5	2.85	2.04	1.61	0.98	1.62	4.05	2.34	3.13	2.05	7.01	1.76	3.09
TRINITY_DN103750_c0_g1_i1.p1	0	0	0	0	0	0	0.4	0.36	0	0.3	0	0	0	0	0	0	0	0	0	0	0	AT4G09150.1	2.74e-27
TRINITY_DN103767_c0_g1_i1.p1	0	0	0	0	0	0.56	0	0	0	0.81	0	0	0	0	0	0	0.51	0.47	0	0	0	AT1G31350.1	8.37e-25	F-box/kelch-repeat protein SKIP25 [Source:UniProtKB/Swiss-Prot;Acc:Q8GX29]	SKI25_ARATH	8.24e-24
TRINITY_DN103772_c0_g3_i1.p1	44.88	32.83	28.34	26.11	56.78	50.32	49.11	37.12	19.94	48.64	38.84	32.12	34.97	33.81	73.67	32.45	23.02	22.98	41.55	56.77	65.61	AT4G02050.2	0	Sugar transport protein 7 [Source:UniProtKB/Swiss-Prot;Acc:O04249]	HEX6_RICCO	0
TRINITY_DN103779_c0_g1_i1.p1	0	0	0	0	0	0	0	0	0	0.69	0	0	0	0	0	0	0	0	0	0.42	0	AT3G14170.2	2.5e-44
TRINITY_DN10377_c0_g4_i2.p1	1.73	2.17	1.49	3.51	2.83	1.89	3.73	4.37	5.77	2.68	4.01	4.02	3.19	4.7	4.54	3.02	4.57	5.22	3.15	6.71	0.97	AT4G12080.1	8.64e-38	AT-hook motif nuclear-localized protein 1 [Source:UniProtKB/Swiss-Prot;Acc:Q8VYJ2]	AHL1_ARATH	8.5e-37
TRINITY_DN10378_c0_g1_i3.p1	43.05	42.1	33.52	28.76	48.76	47.39	49.36	45.51	41.38	41.8	39.4	46.79	49.55	48.09	48.57	38.26	50.84	49.6	66.08	62.33	51.92	AT5G24060.1	1.11e-114		Y3913_ARATH	2.94e-109
TRINITY_DN10378_c0_g2_i1.p1	19.31	15.7	17.17	12.16	17.47	19.98	16.71	20.22	22.76	22.58	18.47	23.07	24.29	23.04	34.39	28.05	28.96	30.09	46.69	28.25	22.51	AT5G27030.1	0	Topless-related protein 3 [Source:UniProtKB/Swiss-Prot;Acc:Q84JM4]	TPR3_ARATH	0
TRINITY_DN10378_c1_g1_i1.p1	50.3	24.33	63.89	44.96	60.89	42.06	45.7	31.96	50.74	59.53	37.24	54.82	32	37.69	34.99	38.12	66.39	54.79	39.86	22.94	15.3	AT3G07310.1	5.72e-99		UVB31_ARATH	1.73e-45
TRINITY_DN103797_c0_g2_i2.p2	0	0.28	1.58	0.72	0	0.32	0	2.84	2.33	0.73	0.66	0.83	0	2.41	0.92	2.78	1.8	0.55	1.39	0.89	1.06	AT4G12680.1	1.53e-85		Y3739_ARATH	2.77e-29
TRINITY_DN103797_c0_g2_i3.p1	0.7	0	0.75	0.41	0.84	0.36	0.36	0.64	1.51	0.56	0.55	0.16	0.18	0.15	0.7	1.91	0.34	0.63	0.16	0.17	0.46	AT4G12680.1	3.92e-108		Y3739_ARATH	7.04e-76
TRINITY_DN103798_c0_g1_i1.p1	0	0	0.28	0	0	1.38	0	0	0.36	0	0	0	0	0	0.66	0	0.32	2.08	0	0	0	AT4G29090.1	3.44e-28		M310_ARATH	4.62e-27
TRINITY_DN1037_c0_g1_i17.p1	4.71	4.64	1.83	2.21	3.41	2.44	3.39	4.57	4.61	3.03	0.25	1.72	3.68	2.25	2.13	5.67	4.17	2.99	3.84	3.64	2.28	AT5G07950.1	6.12e-60
TRINITY_DN103802_c0_g1_i1.p1	0.35	0.32	0	0	0.69	0	0	0.66	0	0.28	1.17	0	0.75	0	0	0	0	0	0	0	0	AT2G46760.1	5.11e-84	Probable L-gulonolactone oxidase 6 [Source:UniProtKB/Swiss-Prot;Acc:O81032]	GGLO6_ARATH	5.03e-83
TRINITY_DN10381_c0_g1_i1.p1	1.16	1.01	1.95	1.66	1.9	1.91	0.97	3.13	2.38	2.67	2.55	1.66	3.46	2.43	3.17	4.3	4.41	4.42	4.53	1.64	1.4	AT4G23160.2	2.98e-108		POLX_TOBAC	0
TRINITY_DN103830_c0_g1_i1.p1	0	0.06	0.06	0.17	0	0	0.07	0.07	0	0	0.15	0	0.3	0	0	0	0.14	0	0	0.07	0	AT1G70820.1	0		ALGC_PSEPK	6.35e-34
TRINITY_DN103837_c0_g1_i2.p1	0	0	0	0.2	0	0	0	0	0	0	0	0	0.18	0	0	0	0	0	0	0	0.15	AT4G02570.4	0	Cullin-1 [Source:UniProtKB/Swiss-Prot;Acc:Q94AH6]	CUL1_ORYSJ	0
TRINITY_DN103839_c0_g1_i1.p1	0	0.77	0.36	0	0.81	0	0	0.39	0	0	0.93	1.11	0	0	0.41	0.43	0.41	0.38	0	0	0	AT4G29090.1	5.5e-11		M310_ARATH	3.11e-09
TRINITY_DN103853_c0_g1_i1.p1	29.45	19.68	21.05	29.03	31.93	14.8	12.89	13.5	12.89	41.65	57.35	11.55	13.24	6.06	2.43	1.62	2.27	2.4	2.09	2.15	0.97	AT2G30210.1	0	Laccase-3 [Source:UniProtKB/Swiss-Prot;Acc:Q56YT0]	LAC3_ARATH	0
TRINITY_DN103867_c0_g1_i1.p1	8.58	13.9	9.48	3.74	9.01	13.46	10.6	19.74	17.03	9.92	15.71	13.28	24.46	13.89	42.69	23.83	17.57	18.25	28.41	18.99	19.38
TRINITY_DN10386_c0_g1_i1.p1	10.51	11.03	8.78	7.99	11.1	7.21	8.84	13.68	13.64	12.09	12.45	12.32	12.19	14.49	24.85	23.05	18.21	16.25	24.62	18.56	21.83	AT5G63120.2	0	DEAD-box ATP-dependent RNA helicase 30 [Source:UniProtKB/Swiss-Prot;Acc:Q8W4R3]	RH30_ARATH	0
TRINITY_DN103876_c0_g1_i1.p1	0	0	0	0	0	0	0	0	0	0	0	0	0	0	0.18	0	0.34	0	0.32	0	1.71	AT5G18400.1	1.91e-11	Anamorsin homolog [Source:UniProtKB/Swiss-Prot;Acc:Q8L7Z3]	DRE2_PYRTR	0
TRINITY_DN103885_c0_g2_i2.p1	0	0	0	0	0	0	0.43	0	0	0	0	0	0	0	0	0	0	0	0	0	0	AT3G10420.1	1.37e-61		SPD1_ARATH	8.86e-60
TRINITY_DN10388_c0_g1_i2.p1	1.08	3.03	3.25	0.65	2.11	0.59	1.73	0	0.6	5.86	6.18	1.42	0	0.48	2.66	0.56	7.99	0.97	0	0	0.45
TRINITY_DN103892_c0_g1_i1.p1	0	0	0	0	0	0	0	0	0	0	0	0	0	0	0	0	0	0	0	0	0	AT4G35250.1	4.74e-110		HC244_ARATH	4.66e-109
TRINITY_DN103894_c0_g1_i1.p1	0	0	0	0	0	0	0	0	0	0	0.43	0	0	0	0	0	0.38	0.35	0	0	0.33	ATMG00810.1	1.37e-22	Uncharacterized mitochondrial protein AtMg00810 [Source:UniProtKB/Swiss-Prot;Acc:P92519]	POLX_TOBAC	5.7e-39
TRINITY_DN103897_c0_g2_i1.p1	2.41	3.34	2.89	1.61	2.22	1.88	1.31	2.72	3	2.5	2.69	3.55	2.93	2.7	2.82	2.1	3.73	3.72	4.96	2.96	1.67	AT1G05087.1	3.94e-39
TRINITY_DN10389_c0_g1_i4.p1	5.14	6.3	7.59	6.74	6.95	6.79	6.14	8	9.1	9.22	7.84	8.32	8.19	8.97	9.87	9.24	11.81	10.17	13.75	8.77	9.04	AT3G19670.2	0	Pre-mRNA-processing protein 40B [Source:UniProtKB/Swiss-Prot;Acc:F4JCC1]	PR40B_ARATH	0
TRINITY_DN1038_c0_g1_i2.p1	1.46	5.04	4.49	0.95	8.82	17.29	9.84	20.09	14.44	6.78	3.86	13.51	25.77	15.11	15.24	10.58	5.27	7.3	19.87	11.71	20.74	AT2G18193.1	5.17e-176	AAA-ATPase At2g18193 [Source:UniProtKB/Swiss-Prot;Acc:Q8GW96]	AATP3_ARATH	5.09e-175
TRINITY_DN103905_c0_g1_i2.p1	0	0	0	0	0.3	0	0	0	0	0	0	0	0	0.27	0	0	0	0	0	0	0	AT3G02720.1	1.23e-134	Protein DJ-1 homolog D [Source:UniProtKB/Swiss-Prot;Acc:Q9M8R4]	DJ1D_ARATH	1.21e-133
TRINITY_DN103905_c0_g2_i1.p1	0	0	0	0	0	0	0	0	0	0	0	0	0	0	0	0.93	0	0	0	0	0	AT3G02720.1	1.36e-66	Protein DJ-1 homolog D [Source:UniProtKB/Swiss-Prot;Acc:Q9M8R4]	DJ1D_ARATH	1.34e-65
TRINITY_DN10390_c0_g1_i1.p1	43.11	42.78	25.64	26.4	36.38	38.68	34.71	35.6	50.62	38.47	40.79	49.4	43.67	34.9	43.54	33.77	46.24	51.43	57.52	49.96	46.12	AT4G29870.1	4.68e-61		OSTCB_XENLA	2.57e-29
TRINITY_DN10391_c0_g1_i1.p1	14.77	12.02	22.66	17.92	24.66	25.43	22.93	24.86	22.34	20.7	20.75	27.16	23.14	21.4	30.02	21.47	34.17	36.1	41.75	39.09	37.11	AT3G49250.1	2.04e-124	Protein DEFECTIVE IN MERISTEM SILENCING 3 [Source:UniProtKB/Swiss-Prot;Acc:Q94A79]	DMS3_ARATH	2.01e-123
TRINITY_DN10392_c0_g3_i1.p1	4.14	3.05	3.71	4.03	2.3	2.2	1.83	3.98	3.52	6.61	8.6	7.13	4.71	4.46	5.16	3.92	8.12	10.12	10.65	5.75	4.59	AT2G31240.1	0		KLCR1_ARATH	7.84e-40
TRINITY_DN103947_c0_g1_i3.p1	0	0.43	0	0	0	0.33	0	0.3	0.17	0	0.17	0	0	0	0	0	0.32	0	0.15	0	0.14
TRINITY_DN103947_c0_g2_i2.p1	0.33	0.3	0.57	0	0	0	0.69	0.31	0	0.26	0	0	0.35	0	0	0	0	0	0	0	0
TRINITY_DN103948_c0_g1_i1.p1	0	0	0	0	0	0.59	0	0	0	0.85	0	0	0	0	0	0	0	0	0	0	0	AT5G19980.1	9.45e-88	GDP-mannose transporter GONST4 [Source:UniProtKB/Swiss-Prot;Acc:Q84L08]	GFT1_ARATH	9.29e-87
TRINITY_DN10394_c0_g1_i1.p1	103.26	93.09	62.66	36.14	80.43	128.63	122.92	92.2	81.71	81.08	58.11	66.71	96.17	90.28	25.7	22.45	30.88	25.39	43.46	42.72	59.61	AT4G30440.1	0	UDP-glucuronate 4-epimerase 1 [Source:UniProtKB/Swiss-Prot;Acc:Q9M0B6]	GAE1_ARATH	0
TRINITY_DN103951_c0_g1_i1.p1	0.73	0	0	0	0	0	0	0	0	0.29	0.4	0	0	0	0	0	0	0	0	0	0	ATMG00710.1	8.2e-06	Uncharacterized mitochondrial protein AtMg00710 [Source:UniProtKB/Swiss-Prot;Acc:P92512]	POLR1_ARATH	9.74e-44
TRINITY_DN103952_c0_g1_i1.p1	0.59	0	0	0	0	0	0	0	0	0	0	0	0	0	0	0	0	0	0	0.57	0	AT2G34320.1	5.41e-09
TRINITY_DN10396_c0_g1_i1.p1	63.72	56.08	43.91	24.24	36.3	56.65	78.83	96.06	114.71	47.07	28.71	43.33	77.47	103.17	153.32	157.04	122.73	68.25	59.41	80.06	108.09	AT1G75100.1	6.66e-20	J domain-containing protein required for chloroplast accumulation response 1 [Source:UniProtKB/Swiss-Prot;Acc:Q9C9Q4]	JAC1_ARATH	6.55e-19
TRINITY_DN10396_c0_g1_i12.p2	4.56	3.02	6.89	3.1	11.93	6.41	7.42	17.15	2.13	6.81	3.01	8.56	4.73	10.91	15.76	11.58	10.86	6.27	5.85	4.88	8.36	AT1G75100.1	3.11e-16	J domain-containing protein required for chloroplast accumulation response 1 [Source:UniProtKB/Swiss-Prot;Acc:Q9C9Q4]	JAC1_ARATH	3.06e-15
TRINITY_DN10396_c0_g1_i17.p2	86.62	77.79	61.63	40.39	52.14	68.17	106.69	117.36	126.38	57.03	43.35	75.56	92.69	120.55	149.13	176.42	156.85	87.87	77.93	105.26	151.91	AT1G75100.1	2.78e-53	J domain-containing protein required for chloroplast accumulation response 1 [Source:UniProtKB/Swiss-Prot;Acc:Q9C9Q4]	JAC1_ARATH	2.73e-52
TRINITY_DN10396_c0_g1_i4.p2	4.07	4.53	4.85	5.55	6.35	8.2	4.87	7.26	10.24	7.97	5.78	5.65	7.26	9.04	12.81	9.17	8.62	9.64	10.77	4.53	5.71
TRINITY_DN103981_c0_g1_i1.p1	0	0	0	0.11	0.18	0	0.39	0.26	0	0	0	0.27	0	0.08	0	0.09	0.09	0.7	0.44	0	0.26	AT2G30300.1	3.46e-120		NFD4_ARATH	1.41e-81
TRINITY_DN103985_c0_g1_i1.p1	0	0	0	0	0	0	0	0	0	0	0	0.98	0	0	0	1.11	0	0.33	0	0	0	AT3G09290.1	2.36e-10	Transcriptional regulator TAC1 [Source:UniProtKB/Swiss-Prot;Acc:Q9SR34]	TA1_ARATH	2.32e-09
TRINITY_DN10398_c0_g3_i1.p1	3.05	2.92	1.76	1.77	2.69	2.08	1.94	3.73	3.16	3.21	2.78	3.07	3.12	2.4	2.19	4.03	4.5	4.86	4.15	6.39	2.62	AT3G20530.1	8.43e-177		PBL23_ARATH	8.3e-176
TRINITY_DN10398_c1_g2_i4.p1	18.55	13.14	13.21	12.1	16.97	19.9	19.77	26.85	26.81	14.22	16.62	20.04	22.09	22.09	37.48	23.98	26.23	26.04	33.33	34.56	32.29	AT4G10050.1	0		PPME1_BOVIN	1.04e-101
TRINITY_DN103999_c0_g3_i1.p1	0	0	0	0.76	0	0	0	0	0	0	0	0	0	0	0	0	0	0	0	0	0				POLR2_ARATH	3.91e-09
TRINITY_DN10399_c0_g1_i1.p1	6.35	7.37	7.01	5.57	11.03	10.34	10.99	11.86	11.09	8.14	7.07	15.28	11.83	10.51	13.35	11.76	13.17	12.03	11.67	9.55	12.38	AT1G70420.1	1.57e-39
TRINITY_DN1039_c0_g1_i3.p1	5.12	5.87	7.36	4.83	5.66	6.14	8.02	5.11	9.08	5.35	6.49	7.14	7.76	5.99	7.67	7.12	10.04	10.76	14.33	10.5	7.88	AT1G30450.1	0	Cation-chloride cotransporter 1 [Source:UniProtKB/Swiss-Prot;Acc:Q2UVJ5]	CCC1_ORYSJ	0
TRINITY_DN1039_c0_g1_i3.p2	3.38	3.25	4.19	3.25	1.97	3.9	3.28	4.99	4.92	2.74	2.61	5.43	5.27	2.53	3.86	3.49	4.03	5.74	7.04	5.53	3.93	AT1G30450.1	2.77e-132	Cation-chloride cotransporter 1 [Source:UniProtKB/Swiss-Prot;Acc:Q2UVJ5]	CCC1_ARATH	2.72e-131
TRINITY_DN1039_c0_g1_i5.p1	7.28	5.96	5.76	4.27	6.66	6.8	6.77	6.84	6.82	7.12	5.76	5.91	6.99	7.1	9.86	6.91	9.1	9.68	11.96	9.01	7.57	AT1G30450.1	0	Cation-chloride cotransporter 1 [Source:UniProtKB/Swiss-Prot;Acc:Q2UVJ5]	CCC1_ORYSJ	0
TRINITY_DN103_c1_g1_i1.p1	6.8	3.31	2.78	3.09	3.61	2.89	4.55	3.28	3.97	4.28	3.99	6.6	4.02	2.59	4.85	7.88	8.93	12.47	16.39	11.01	5.38	AT4G36920.2	1.23e-119	Floral homeotic protein APETALA 2 [Source:UniProtKB/Swiss-Prot;Acc:P47927]	AP2_ARATH	1.21e-118
TRINITY_DN103_c1_g2_i3.p1	0.97	0.38	1.96	5.25	4.86	2.74	2.18	0.79	0.93	3.78	5.7	4.81	1.98	1.57	2.51	2.34	9.62	15.2	16.97	6.77	3.19	AT4G36920.2	5.01e-101	Floral homeotic protein APETALA 2 [Source:UniProtKB/Swiss-Prot;Acc:P47927]	AP2_ARATH	4.93e-100
TRINITY_DN104007_c0_g1_i1.p1	0	0	0	0	0	0	0	0	0	0	0	0	0	0	0	0	0	0.46	0	0	0.43	AT1G16810.1	3.83e-40		FA32A_PONAB	4.61e-11
TRINITY_DN104026_c0_g1_i1.p1	0	0	0	0	0	0	0	0	0	0	0	0	0	0	0	0.25	0	0	0	0	0	AT2G31880.1	6e-82	Leucine-rich repeat receptor-like serine/threonine/tyrosine-protein kinase SOBIR1 [Source:UniProtKB/Swiss-Prot;Acc:Q9SKB2]	SBIR1_ARATH	5.9e-81
TRINITY_DN104026_c0_g2_i2.p1	0	0	0	0.62	0	0	0	0	0	0	0	0	0	0	0	0	0	0	0	0	0	AT2G31880.1	3.16e-38	Leucine-rich repeat receptor-like serine/threonine/tyrosine-protein kinase SOBIR1 [Source:UniProtKB/Swiss-Prot;Acc:Q9SKB2]	LERK2_ORYSJ	8.5e-38
TRINITY_DN10403_c0_g1_i4.p1	5.79	4.56	5.32	6.03	8.25	6.3	5.03	6.42	7.87	6.17	4.54	5.48	5.14	7.41	7.64	8.46	10.5	8.1	10.48	9.37	9.67	AT1G45231.2	5.51e-115		TGS1_RAT	7.03e-70
TRINITY_DN10403_c3_g2_i1.p1	4.86	3.29	3.19	2.73	4.31	2.6	3.58	5.37	4.01	3.61	3.09	5	6.64	6.05	5.68	7.56	6.5	4.42	8.1	5.26	6.37	AT4G27910.1	4.51e-94	Histone-lysine N-methyltransferase ATX4 [Source:UniProtKB/Swiss-Prot;Acc:Q9SUE7]	ATX4_ARATH	4.44e-93
TRINITY_DN104068_c0_g1_i1.p1	0	0	0	0	0	0	0	0	0	0	0	0	0	0	0.36	0	0	0	0.16	0	1.12
TRINITY_DN104082_c0_g2_i2.p1	0.78	0	0.34	0	0.38	1.67	0.41	0	0.43	0	0	0.35	0.84	0.35	0	1.2	0	0	2.13	0	0	AT3G20980.1	3.06e-07		POLR1_ARATH	6.51e-10
TRINITY_DN104094_c0_g1_i3.p1	0.15	0.26	0.13	0	0	0	0	0	0.16	0	0.61	0.14	0.15	0	0	0.29	0.29	0.13	0	0.14	0
TRINITY_DN104094_c0_g1_i4.p2	0	0	0	0	0	0	0	0	0	0	0	0	0	0.33	0	0	0	0	0	0	0
TRINITY_DN10409_c0_g1_i3.p1	3.13	2.67	1.94	1.11	2.15	1.54	1.13	0.88	1.38	1.64	2.73	2.02	0.98	0.89	0.24	0.63	1.26	1.9	0.87	0.15	0.22	AT5G45290.1	2.33e-60		RMR4_ARATH	4.1e-08
TRINITY_DN1040_c0_g1_i2.p1	4.33	2.76	3.06	3.64	5.22	7.91	5.1	6.73	9.54	5.41	3.69	6.29	5.01	7	11.67	13.04	8.93	10.01	14.27	16.28	18.05	AT2G41710.1	1.76e-107	AP2-like ethylene-responsive transcription factor At2g41710 [Source:UniProtKB/Swiss-Prot;Acc:Q8GWK2]	AP2L4_ARATH	7.63e-104
TRINITY_DN1040_c0_g3_i1.p1	0.67	0.57	2.55	0	0	0	0	0	0	0	0	0	0	0	0	0	0.63	0	0	0	1.17	AT2G41710.1	9.82e-40	AP2-like ethylene-responsive transcription factor At2g41710 [Source:UniProtKB/Swiss-Prot;Acc:Q8GWK2]	AP2L4_ARATH	1.06e-38
TRINITY_DN10410_c0_g1_i1.p1	20.43	18.98	6.65	8.51	21.46	21.4	19.75	16.42	17.14	14.68	12.26	14.76	20.24	23.96	19.77	21.44	23.73	19.68	29.4	25.18	17.55	AT5G62530.1	0	Delta-1-pyrroline-5-carboxylate dehydrogenase 12A1, mitochondrial [Source:UniProtKB/Swiss-Prot;Acc:Q8VZC3]	AL121_ARATH	0
TRINITY_DN10411_c0_g1_i1.p1	0.22	0.15	0	0.19	0.48	1.19	0.34	0.15	0.36	0	0	0.15	0.34	0.29	0.17	0.59	0.33	0.75	0.31	0.64	0.29	AT4G26485.1	3.63e-49	Uncharacterized protein At4g26485 [Source:UniProtKB/Swiss-Prot;Acc:P0C8L4]	Y4648_ARATH	3.57e-48
TRINITY_DN10411_c0_g1_i3.p1	1.34	0.6	1.35	1.05	0.43	0	2.3	1.24	1.7	0.9	0.48	1.43	0.23	0.78	0.67	1.43	2.2	0.81	0.41	1.3	1.58	AT5G21170.1	9.18e-52	SNF1-related protein kinase regulatory subunit beta-1 [Source:UniProtKB/Swiss-Prot;Acc:Q84VQ1]	KINB2_ARATH	6.05e-63
TRINITY_DN10411_c0_g1_i8.p1	0.42	0	0.27	0	0	0	0	0.58	0	0.39	1.17	0	0	0	0.32	0	0	0	0.28	0	0	AT4G26485.1	3.78e-49	Uncharacterized protein At4g26485 [Source:UniProtKB/Swiss-Prot;Acc:P0C8L4]	Y4648_ARATH	3.72e-48
TRINITY_DN104121_c0_g1_i1.p1	0	0	0	0	0	0	0	0	0	0	0	0	0	0	0	0	0	0	0	0	0	AT3G05670.3	3.28e-32		TOPRS_DROME	1.4e-07
TRINITY_DN104122_c0_g1_i1.p1	0.14	0.72	0.12	0.16	0	0	0.28	0	0.44	0.11	0.28	0.13	0.28	0	0	0.27	0	0.25	0	0.13	0.49	AT3G51060.1	8.5e-59	Protein SHI RELATED SEQUENCE 1 [Source:UniProtKB/Swiss-Prot;Acc:Q9SD40]	SRS1_ARATH	8.37e-58
TRINITY_DN104123_c0_g1_i1.p1	0	0	0	0	0	0	0	0	0	0	0	0	0	0	0.31	0	0	0	0.57	0	0.54				CTR5_SCHPO	2.09e-15
TRINITY_DN10412_c0_g1_i3.p1	2.79	1.72	2.4	2.23	3.17	6.49	2.46	5.67	5.63	1.82	1.57	5.34	5.53	4.97	12.42	9.58	8.71	10.92	19.82	16.63	12.24	AT4G23270.2	9.2e-53	Cysteine-rich receptor-like protein kinase 19 [Source:UniProtKB/Swiss-Prot;Acc:Q8GWJ7]	CRK19_ARATH	9.05e-52
TRINITY_DN104142_c0_g1_i1.p1	0	0	0	0	1.39	0	0	0	0	0	0	0.42	0.52	0	0	0	0	0	0	0	0	AT3G12550.3	1.89e-09	Factor of DNA methylation 3 [Source:UniProtKB/Swiss-Prot;Acc:Q9LHB1]	FDM3_ARATH	2.28e-08
TRINITY_DN10414_c0_g1_i1.p1	5.26	5.07	2.94	2.34	2.53	3.8	2.83	7.11	2.68	4.39	3.57	3.43	7.31	5.99	8.28	7.98	7.14	6.61	9.25	3.44	4.41	AT5G44800.1	5.71e-37	Protein CHROMATIN REMODELING 4 [Source:UniProtKB/Swiss-Prot;Acc:F4KBP5]	CHR4_ARATH	5.61e-36
TRINITY_DN104158_c0_g3_i2.p1	0	0	0	0	0	0	0	0	0.61	0	0	0	0	0	0.55	1.16	1.09	0	0	1.07	0
TRINITY_DN10415_c0_g1_i3.p1	1.2	0.36	0	0	0.38	0.21	0.41	1.29	0.65	0.32	0.84	0.18	0.62	1.03	0.4	1.59	0.78	0	0.18	0.19	0	AT5G08020.1	1.6e-10	Replication protein A 70 kDa DNA-binding subunit B [Source:UniProtKB/Swiss-Prot;Acc:Q9SD82]	RFA1B_ORYSJ	1.22e-12
TRINITY_DN10415_c0_g1_i4.p2	0.66	0.3	0.29	0.39	1.28	0.35	0.34	2.46	1.08	0.53	1.44	0.6	0	2.61	0.66	1.01	1.3	1.2	0.6	0.96	0.29
TRINITY_DN104162_c0_g2_i1.p2	0.24	0	0	0	0	0	0	0	0	0	0	0.22	0	0	0	0	0	0	0.22	0	0	AT2G32390.6	4.04e-79	Glutamate receptor 3.5 [Source:UniProtKB/Swiss-Prot;Acc:Q9SW97]	GLR35_ARATH	2.25e-76
TRINITY_DN104171_c1_g1_i1.p1	0	0	0	0	0	0	0	0	0	0	0	0	0	0	0	0	0	0	0.51	0	0	ATMG00810.1	1.08e-44	Uncharacterized mitochondrial protein AtMg00810 [Source:UniProtKB/Swiss-Prot;Acc:P92519]	POLR1_ARATH	1.48e-48
TRINITY_DN104187_c0_g1_i1.p1	5.9	6.4	6.03	4.4	5.45	7.5	6.77	7.66	9.14	9.06	9.84	9.9	7.78	8.16	17.2	8.93	12.04	14.76	23.91	13.21	14.56	AT1G77030.1	0	Putative DEAD-box ATP-dependent RNA helicase 29 [Source:UniProtKB/Swiss-Prot;Acc:O49289]	RH29_ARATH	0
TRINITY_DN104187_c0_g1_i2.p1	1.33	2.29	1.68	0.66	0.83	1.63	0.67	1.01	2.41	1.65	3.26	0.59	2.18	2.7	4.45	3.31	3.7	3.16	7.93	5.84	4.03	AT1G77030.1	0	Putative DEAD-box ATP-dependent RNA helicase 29 [Source:UniProtKB/Swiss-Prot;Acc:O49289]	RH29_ARATH	0
TRINITY_DN104189_c0_g2_i1.p1	0	0	0	0	0	0	0	0	0	0	0	0	0	0	0	0	0	0	0	0	0.22	AT1G64140.1	1.91e-17		WRK19_ARATH	1.66e-09
TRINITY_DN104190_c0_g1_i1.p1	1.11	0	0	1.34	0	0	0	1.05	0	0	0.64	0	0	0	0	0	0	0	0	0	0	AT4G34320.2	2.72e-53	UPF0496 protein At4g34320 [Source:UniProtKB/Swiss-Prot;Acc:Q9SYZ7]	U496A_ARATH	2.67e-52
TRINITY_DN1041_c0_g1_i1.p1	7.35	9.31	7.47	1.28	6.31	8.23	10.71	9.55	9.49	3.69	3.81	9.16	6.26	13.05	9.61	9.02	8.79	3.94	11.39	12.55	17.78	AT5G40540.2	2.73e-133		STY13_ARATH	2.03e-54
TRINITY_DN1041_c0_g2_i1.p1	6.85	7.78	10.69	6.94	23.9	37.2	17.12	39.13	30.13	21.29	10.14	34.99	45.28	27.82	61.55	26.14	34.08	32.64	84.17	69.37	54.19	AT5G40540.1	0		HT1_ARATH	2.86e-71
TRINITY_DN104203_c0_g1_i1.p1	0	0	0	1.38	0	0	0	0	0	0	0	0.5	0	0	0	0	0	0	0	0	0	AT2G41700.2	1.36e-25	ABC transporter A family member 1 [Source:UniProtKB/Swiss-Prot;Acc:Q84M24]	YHAQ_BACSU	4.98e-52
TRINITY_DN10420_c1_g1_i15.p1	0.09	0.74	0.57	0.11	0.09	0.57	0.38	0.26	0.2	0.31	1.17	0.26	0.48	0.64	0.67	0.65	0.37	0.6	1.44	0.54	0.42	AT4G18010.1	1.22e-160	Type I inositol polyphosphate 5-phosphatase 2 [Source:UniProtKB/Swiss-Prot;Acc:Q9FUR2]	IP5P2_ARATH	1.2e-159
TRINITY_DN10421_c0_g1_i1.p1	2.27	2.95	1.36	3.88	3.37	3.06	1.96	3.22	6.44	4.82	2.03	4.51	2.71	5.59	14.82	10.09	14.95	12.4	26.3	14.71	16.47	AT2G02370.3	1.41e-120		Y305_SYNY3	1.1e-10
TRINITY_DN10421_c0_g2_i4.p1	5.58	7.74	11.88	8.56	6.35	4.48	8.19	7.32	8.25	7.57	5.01	7.09	12.83	9.21	10.48	16.63	12.27	11.3	8.63	8.25	6.83
TRINITY_DN10422_c1_g1_i1.p1	0	0	0	0	0	0	0	0	0	0	0	0	0	0	0	0	0	0	0	0.32	0.29	AT5G13770.1	5.57e-16	Pentatricopeptide repeat-containing protein At5g13770, chloroplastic [Source:UniProtKB/Swiss-Prot;Acc:Q66GP4]	PP379_ARATH	5.48e-15
TRINITY_DN104232_c0_g1_i3.p1	26.53	24.02	19.75	15.29	23.19	25.13	23.39	27.37	25.24	23.06	22.09	21.26	27.99	24.84	29.61	34.15	29.96	29.57	35.68	26.01	25.27	AT1G60490.1	0	Phosphatidylinositol 3-kinase VPS34 [Source:UniProtKB/Swiss-Prot;Acc:P42339]	PI3K1_SOYBN	0
TRINITY_DN104232_c0_g1_i6.p2	2.16	2.67	0.53	0	1.92	2.29	4.08	2.85	2.4	4	2.84	2.33	3.5	2.48	5.23	3.7	3.68	2.08	1.69	2.57	3.1	AT1G60490.1	7.64e-71	Phosphatidylinositol 3-kinase VPS34 [Source:UniProtKB/Swiss-Prot;Acc:P42339]	PI3K_ARATH	7.51e-70
TRINITY_DN104232_c0_g1_i7.p1	1.52	0.65	2.63	1.06	2.57	0.55	2.08	3.12	1.09	1.59	2.14	0	0	0.51	2.74	0	2.25	0.53	0	0	0	AT1G60490.1	5.13e-95	Phosphatidylinositol 3-kinase VPS34 [Source:UniProtKB/Swiss-Prot;Acc:P42339]	PI3K1_SOYBN	7.45e-105
TRINITY_DN10423_c0_g1_i1.p1	0.84	0	0.48	0.66	1.35	1.17	0.58	1.82	0	0.45	0.6	0	1.76	1.96	1.4	1.69	1.1	0.76	0.76	2.16	2.93
TRINITY_DN10426_c0_g1_i6.p1	0	0	0	0	0	0	0	0	0	0.27	0	0	0	0	0.34	0	0.33	0.31	0.31	0	0
TRINITY_DN10427_c0_g2_i2.p1	1.04	1.93	5.6	3.27	1.8	2.97	2.22	2.49	4.5	2.81	2.27	2.53	3.94	2.86	6.45	5.97	4.51	3.32	6.05	6.45	2.91	AT2G16230.1	0		ALL9_OLEEU	0
TRINITY_DN10428_c0_g1_i6.p1	30.34	33.09	36.78	30.3	35.44	28.33	25.03	35.18	37.97	41.67	43.51	35.8	41.22	36.89	41.72	34.02	40.66	41.01	37.87	29.3	24.99	AT3G27180.1	0		Y1998_PARUW	1.39e-67
TRINITY_DN10429_c0_g1_i1.p1	0.61	1.37	1.05	1.79	1.47	0.95	1.26	1.97	1.65	0.73	0.99	1.65	1.28	1.06	2.12	1.23	3.58	1.1	1.65	0	0.26
TRINITY_DN10429_c0_g1_i2.p1	6.14	5.72	6.61	12.36	17.98	16.61	10.92	10.6	7.35	11.56	5.83	5.84	7.81	10.55	11.11	11.68	11.12	14.8	10.23	12.88	8.64
TRINITY_DN10429_c0_g1_i5.p1	1.96	2.4	0.52	0.7	1.3	1.39	1.99	1.8	1.14	1.96	0.95	0.84	1.86	1.56	2.59	2.84	2.66	1.92	2.05	1.31	1.48	AT1G32010.1	1.33e-09
TRINITY_DN1042_c0_g1_i12.p1	1.87	1.18	2.67	2.28	3.05	0.68	0	4.63	9.56	2.87	4.36	2.47	2.07	4.4	5.8	11.73	8	4.49	3.39	3.39	3.1	AT4G05190.2	4.24e-27	Kinesin-5 [Source:UniProtKB/Swiss-Prot;Acc:F4JGP4]	KN14D_ARATH	4.18e-26
TRINITY_DN1042_c0_g1_i2.p1	0.59	0.55	1.51	1.43	0.57	2.56	2.53	2.86	2.07	2.26	0.68	1.74	0.65	1.17	5.47	6.19	2.9	6.35	2.66	0.78	0.98	AT4G21270.1	2.19e-24	Kinesin-1 [Source:UniProtKB/Swiss-Prot;Acc:Q07970]	KN14C_ARATH	2.16e-23
TRINITY_DN1042_c0_g3_i1.p1	13.27	12.21	10.75	7.4	15.66	14.12	12.35	10.65	8.96	11.68	14.43	13.69	12.89	12.95	8.38	10.54	11.8	11.69	11.64	9.35	5.8	AT1G68060.1	0	Microtubule-associated protein 70-1 [Source:UniProtKB/Swiss-Prot;Acc:Q9C9X0]	MP701_ARATH	0
TRINITY_DN1042_c0_g4_i1.p1	45.66	26.37	21.43	40.43	66.46	45.14	29.78	27.63	26.67	62.95	44.85	61.96	49.69	26.61	15.08	33.6	47.41	66.87	45.06	19.04	12.71	AT1G24764.2	1.44e-103	Microtubule-associated protein 70-2 [Source:UniProtKB/Swiss-Prot;Acc:Q8L7S4]	MP702_ORYSJ	3.03e-106
TRINITY_DN104306_c0_g1_i2.p1	0	0	0	0	0	0	0	0	0	0	0	0	0	0	0.12	0	0	0	0.11	0	0.98	AT5G17310.2	1.14e-148	UTP--glucose-1-phosphate uridylyltransferase 1 [Source:UniProtKB/Swiss-Prot;Acc:P57751]	UGPA1_SCHPO	0
TRINITY_DN10431_c0_g2_i2.p1	26.47	19.67	22.12	17.03	22.76	23.04	18.88	16.92	20.88	27.2	22.95	23.13	28.97	18.49	18.18	16.23	21.11	22.87	34.16	18.09	14.22	AT4G33950.2	0	Serine/threonine-protein kinase SRK2E [Source:UniProtKB/Swiss-Prot;Acc:Q940H6]	SRK2E_ARATH	0
TRINITY_DN10433_c0_g1_i1.p1	5.7	4.55	5.09	5.06	9.64	13.76	7.03	11.4	10.86	9.99	11.43	12.08	12.39	6.79	3.95	4.7	5.98	5.71	5.69	2.85	6.08	AT5G09620.2	2.66e-38
TRINITY_DN104340_c0_g1_i1.p1	1.64	0.51	0.47	1.32	0.53	0	0	0	0	0	0	0.96	0	0	0	0	0	0	0	0	0.46	AT1G68700.1	1.67e-07
TRINITY_DN104342_c0_g1_i1.p1	0	0	0	0	0	0	0	0	0	0	0	0	0	0	0	0	0	0	0	0	1.67	AT5G04590.1	7.04e-28	Assimilatory sulfite reductase (ferredoxin), chloroplastic [Source:UniProtKB/Swiss-Prot;Acc:Q9LZ66]	MET5_SCHPO	9.71e-110
TRINITY_DN104347_c0_g1_i1.p1	0	0	0	0	0	0.36	0	0	0	0.27	0	0	0	0.3	0	0	0	0	0.31	0	0	AT1G29900.1	4.87e-84	Carbamoyl-phosphate synthase large chain, chloroplastic [Source:UniProtKB/Swiss-Prot;Acc:Q42601]	CARB_ORYSJ	7.1e-127
TRINITY_DN104356_c0_g1_i1.p1	0	0	0	0	0	0	0.24	0.44	0	0.57	0	0	0	0	0	0	0	0	0.21	0	0	ATMG00820.1	9.92e-11	Uncharacterized mitochondrial protein AtMg00820 [Source:UniProtKB/Swiss-Prot;Acc:P92520]	POLR2_ARATH	8.64e-15
TRINITY_DN10435_c0_g1_i1.p1	47.46	32.84	42.82	49.02	27.45	33.44	23.18	23.21	28.36	27.05	31.37	44.36	23.44	17.72	50.8	54.84	62.79	62.78	81.26	92.47	81.24	AT3G45600.1	2.17e-119	Tetraspanin-3 [Source:UniProtKB/Swiss-Prot;Acc:Q9M1E7]	TET3_ARATH	2.13e-118
TRINITY_DN10435_c0_g1_i2.p1	8.86	5.53	11.76	13.86	11.29	18.4	9.35	7.78	3.87	14.53	19.23	13.59	7.68	9.57	30.59	22.57	16.65	35.44	20.95	64.17	48.63	AT3G45600.1	1.77e-101	Tetraspanin-3 [Source:UniProtKB/Swiss-Prot;Acc:Q9M1E7]	TET3_ARATH	1.75e-100
TRINITY_DN104362_c0_g1_i1.p1	0	0	0.26	0	0	0	0	0	0	0	0.32	0.27	0	0	0.3	0.3	0	0	0	0	0
TRINITY_DN10437_c0_g1_i2.p1	0.64	1.3	0.92	0.74	0.88	0.93	1.57	2.07	1.6	0.7	0.36	1.65	2.08	1.63	1.58	1.6	1.87	1.16	3.58	1.23	1.53	AT5G49760.1	0		HPCA1_ARATH	0
TRINITY_DN10437_c1_g1_i2.p1	1.42	1.29	0.31	0.84	0.69	0.75	0	3.63	1.94	2.25	2.72	0.64	1.88	1.87	4.94	5.76	3.84	4.17	2.25	2.4	0.61
TRINITY_DN10437_c1_g1_i2.p2	0.92	1.27	0	0	0.45	0.49	0.49	1.72	2.02	0	0.52	0	0.99	1.64	1.36	4.73	3.17	2.08	0.42	0.89	0.78				POLR1_ARATH	9.11e-10
TRINITY_DN10438_c0_g1_i11.p1	1.7	1.09	6.7	3.71	4.92	3.53	4.25	5.38	14.52	3.9	4.67	5.53	4.81	7.39	4.14	10.22	8.11	5.95	9.46	7.98	2.13	AT5G61780.1	1.13e-07		TSN2_ARATH	1.12e-06
TRINITY_DN10439_c0_g1_i2.p1	0.44	0.48	0.57	0.51	0.52	0.22	0.55	0.4	0.12	0.27	0.11	0.41	0	0.56	0.33	0.32	0.96	0.59	0.59	0.32	0.39	AT4G23160.2	1.79e-28		POLX_TOBAC	2.33e-58
TRINITY_DN1043_c0_g1_i11.p1	9.51	10.32	10.41	5.96	11.26	13.11	13.53	16.7	15.81	8.33	10.75	14.47	15.62	17.11	33.45	19.03	16.38	17.93	34.96	31.32	35.77	AT3G48860.1	6.58e-117	Coiled-coil domain-containing protein SCD2 [Source:UniProtKB/Swiss-Prot;Acc:Q8RWD5]	SCD2_ARATH	2.9e-114
TRINITY_DN104403_c0_g1_i1.p1	0.14	0	0.12	0	0	0	0	0	0.15	0	0.15	0	0	0	0	0	0	0.26	0	0	0	AT5G48050.1	1.63e-07		POLX_TOBAC	1.44e-08
TRINITY_DN10440_c0_g1_i9.p1	1.34	1.37	1.16	0.45	1.96	0.39	0.59	2.82	0.83	1.08	0.61	0.7	1.98	0.66	1.16	2.1	1.69	0.87	1.74	0.42	0.34	ATMG00710.1	2.02e-09	Uncharacterized mitochondrial protein AtMg00710 [Source:UniProtKB/Swiss-Prot;Acc:P92512]	POLX_TOBAC	2.46e-46
TRINITY_DN104420_c0_g2_i1.p1	0	0	0	0.27	0	0.24	0	0	0	0	0	0	0	0.2	0	0	0	0	0	0.22	0	AT5G61020.1	3.07e-104		ECT3_ARATH	3.02e-103
TRINITY_DN104434_c0_g1_i1.p1	0.89	0	1.15	0.53	0	0	1.41	0.42	0	0	1	0	0.48	0.39	0	0	0	0	0	0	0.38
TRINITY_DN104459_c0_g2_i1.p1	1.19	0.93	1.6	1.53	1.65	0.67	0.13	0.6	1.14	1.39	2.47	1.59	0.81	0.91	0	2.48	1.55	2.52	1.91	0.51	2.12	AT5G11730.1	9.27e-167		BC10_ORYSJ	1.14e-39
TRINITY_DN104459_c0_g3_i1.p1	0.56	0	0	0	0	0	0	0	0	0	0	0	0	0	0	0	0	0.51	0	0	0	AT5G25970.3	1.49e-13
TRINITY_DN10445_c1_g1_i1.p1	84.62	116.25	53.82	30.53	18.77	44.45	87.74	102.77	84.96	43.04	46.65	45.66	49.37	91.41	96.74	83.44	63.52	45.05	26.03	38.65	77.02
TRINITY_DN10446_c0_g1_i1.p1	46.12	42.21	45.08	36.12	53.2	55.53	44.07	40.86	48.64	39.98	47.58	39.1	46.39	43.9	24.53	26.16	32.14	23.98	35.43	47.97	36.23	AT3G21190.1	0		MSR1_ARATH	0
TRINITY_DN10446_c1_g1_i1.p1	0.34	0.83	0.59	0.4	0.58	0.26	0	0.55	0.37	1.05	1.06	0.56	0.79	1.03	0.7	0.76	1.52	1.17	1.09	1.16	1	AT1G64310.1	0	Putative pentatricopeptide repeat-containing protein At1g64310 [Source:UniProtKB/Swiss-Prot;Acc:Q9C7V5]	PP104_ARATH	0
TRINITY_DN10447_c0_g1_i4.p1	0.6	0	0.52	0	0	0	0.65	0	0	0	0	1.05	0.67	0.55	0	0	0	0	0	0.58	0
TRINITY_DN104496_c0_g1_i1.p1	0	0	0	0	0	0	0	0	0	0	0	0	0	0	0	0	0	0	0	0	0.33	AT1G67480.3	2.83e-74	F-box/kelch-repeat protein At1g67480 [Source:UniProtKB/Swiss-Prot;Acc:Q9CAG8]	FBK28_ARATH	2.78e-73
TRINITY_DN10449_c0_g3_i1.p1	2.59	2.19	2.75	1.96	1.53	2.12	1.91	3.55	2.47	3.74	3.91	2.04	2.43	1.79	1.41	2.74	2.54	2.9	1.89	1.06	1.16	AT1G76890.2	5.72e-43	Trihelix transcription factor GT-2 [Source:UniProtKB/Swiss-Prot;Acc:Q39117]	TGT2_ARATH	5.62e-42
TRINITY_DN1044_c0_g1_i6.p1	10.71	10.21	9.25	12.11	12.79	13.81	9.25	14.76	11.94	11.97	13.46	11.08	9.68	11.18	18.66	13.53	13.22	16.51	11.31	12.85	13.28	AT3G01920.1	4.55e-129		YCIO_SHIFL	5.42e-30
TRINITY_DN10450_c0_g1_i17.p1	1.08	0	0.31	0.43	0	0	0	1.01	0	0	1.98	0.32	0.38	0.95	0.72	0	2.13	0.98	0	0	0	AT4G23160.2	2.04e-53		POLR1_ARATH	3.25e-47
TRINITY_DN104520_c0_g1_i1.p1	0	0	0	0	0	0	0	0	0	0	0	0.96	0	0	0	0	0	0	0.5	0	0	ATMG00810.1	5.21e-31	Uncharacterized mitochondrial protein AtMg00810 [Source:UniProtKB/Swiss-Prot;Acc:P92519]	POLR2_ARATH	3.55e-39
TRINITY_DN10452_c0_g1_i12.p1	0.76	1.05	0.39	0.35	0.99	0.8	1.82	1.95	0.65	1	0.78	1.52	2.18	1.34	2.5	1.33	1.32	2.16	1.69	1.39	1.52	AT4G14103.1	3.69e-28	F-box/LRR-repeat protein At4g14103 [Source:UniProtKB/Swiss-Prot;Acc:Q8L7H1]	FBL75_ARATH	3.63e-27
TRINITY_DN10452_c0_g1_i8.p1	0.36	0.32	0	0.17	0.08	0	0	0	0.32	0.28	0.38	0.15	0	0.29	0	0	0	0.28	0.44	0.34	0.59	AT4G26340.1	1.48e-26	F-box/FBD/LRR-repeat protein At4g26340 [Source:UniProtKB/Swiss-Prot;Acc:Q8H1R7]	FDL27_ARATH	1.46e-25
TRINITY_DN10453_c4_g1_i1.p1	3.83	3.46	3.63	4.52	4.55	4.32	1.83	6.28	6.42	6.35	4.78	6.01	6.81	5.92	5.9	6.84	7.67	6.41	5.34	5.12	4.36	AT5G35430.1	3.44e-46		CN10B_XENLA	2.41e-08
TRINITY_DN104543_c0_g1_i1.p2	0	0	0	0	0	0	0	0	0	0.38	0.56	0	0	0	0	0	0	0.89	0.9	0	1.25
TRINITY_DN104543_c0_g1_i2.p1	2.8	5.18	2.77	2.11	4.63	5.99	3.9	4.61	3.26	3.39	2.12	5.7	3.53	3.99	7.06	4.4	5.31	10.92	18.32	12.97	11.51	AT1G07060.2	4.05e-49		DFO_ARATH	7.57e-37
TRINITY_DN10454_c0_g1_i1.p1	7.31	9.62	5.98	4.11	5.29	5.46	7.82	11.13	10.7	5.99	4.94	5.55	8.94	13.36	12.84	12.15	8.52	7.61	10.84	7.89	10.59	AT1G74860.1	1.3e-23
TRINITY_DN10454_c1_g2_i1.p1	6.2	5.59	5.59	4.16	6.27	5.33	5	7.14	8.04	6.76	5.99	5.53	7.29	8.13	14.16	9.16	9.07	10.09	15.04	12.32	11.23	AT1G27752.1	0		ASCC2_HUMAN	9.75e-19
TRINITY_DN10456_c0_g1_i1.p1	13.19	12.68	20.08	13.53	12.72	9.45	8.64	11.52	18.25	25.82	26.66	16.19	13.74	12.51	16.37	16.83	23.1	21.77	21.95	16.69	13.49	AT4G17600.1	4.84e-91		LIL31_ARATH	4.77e-90
TRINITY_DN10456_c0_g2_i1.p1	368.58	366.09	402.76	339.87	393.93	395.08	386.44	409.39	337.65	426.32	441.32	395.07	400.65	424.79	321.44	314.41	293.32	335.43	262.61	300.7	312.16	AT4G17600.1	2.87e-77		LIL31_ARATH	2.82e-76
TRINITY_DN10456_c1_g1_i2.p1	0	0	0	0	0.52	0	0	0	0	0.44	0.19	0	0	0.16	0.18	0	0.53	0.16	0.16	0.35	0.16	AT4G30020.2	4.4e-79	Subtilisin-like protease SBT2.6 [Source:UniProtKB/Swiss-Prot;Acc:Q9SZV5]	SBT26_ARATH	4.33e-78
TRINITY_DN10457_c0_g1_i6.p1	13.35	16.09	7.37	11.33	12.89	12.79	12.68	13.59	15.12	16.89	14.07	18.68	13.13	17.22	20.33	16.65	27.83	24.22	29.03	17.03	16.82	AT1G72880.1	5.54e-78		SURE_DESHY	9.64e-29
TRINITY_DN10458_c0_g1_i3.p1	6.77	5.92	4.73	3.92	5.67	4.13	4.47	6.79	7.42	6.01	7.01	5.67	6.03	6	6.69	9.15	8.53	7.91	9.18	3.66	3.69	AT3G54280.1	0	TATA-binding protein-associated factor BTAF1 [Source:UniProtKB/Swiss-Prot;Acc:B5BT18]	BTAF1_ARATH	0
TRINITY_DN104591_c0_g1_i1.p1	0	0	0	0	0	1.26	0	0.55	0	0	0	0	0	0	0	0	0	0	0	0	0
TRINITY_DN10459_c0_g2_i1.p1	4.93	2.1	1.75	2.74	4.21	3.64	2.1	4.57	3.8	2.09	2.2	4.47	3.35	4.56	1.45	3.51	1.14	2.37	1.58	2.24	4.3
TRINITY_DN1045_c0_g1_i10.p1	6.91	3.53	5.52	4.23	8.3	8.51	8.28	5.08	9.35	11.61	6.91	9.87	7.65	10.13	8.53	7.73	12.04	9.42	10.32	9.18	9.2	AT3G20800.1	1.45e-144		CNOT9_XENTR	1.34e-114
TRINITY_DN1045_c0_g1_i7.p1	12.08	10.43	12.11	9.71	9.49	9.96	10.29	13.2	17.63	12.65	11.91	15.25	11.44	13.01	14.42	15.88	14.75	16.59	20.58	17.99	15.05	AT2G35530.1	4.02e-116	bZIP transcription factor 16 [Source:UniProtKB/Swiss-Prot;Acc:Q501B2]	BZP16_ARATH	3.96e-115
TRINITY_DN1045_c0_g2_i1.p1	12.73	11.4	13.19	9.52	15.85	10.79	10.23	15.39	12.08	13.96	15.56	16.07	13.25	14.47	21.86	17.85	19.8	20.6	28.32	22.15	24.04	AT2G35530.1	5.42e-78	bZIP transcription factor 16 [Source:UniProtKB/Swiss-Prot;Acc:Q501B2]	BZP16_ARATH	5.33e-77
TRINITY_DN104608_c0_g1_i1.p1	0	0	0	0	0	0	0	0	0	0	0	0	0	0.4	0	0	0	0	0	0	0	AT1G36370.1	3.41e-73	Serine hydroxymethyltransferase 7 [Source:UniProtKB/Swiss-Prot;Acc:Q84WV0]	GLYC7_ARATH	3.36e-72
TRINITY_DN10460_c0_g1_i1.p1	31.49	27.74	28.3	22.1	29.71	24.35	28.56	35.56	31.86	26.41	26.63	30.21	27.34	33.97	44.38	38.11	38.73	32.68	42.69	54.44	52.74	AT2G21190.1	3.79e-160		ERD21_CAEEL	1.7e-26
TRINITY_DN10460_c0_g1_i4.p1	32.39	31.02	26.13	22.73	30.17	29.28	28.84	32.62	29.38	30.73	23.99	27.71	22.11	24.37	36.86	35.56	29.52	33.09	35.51	43.86	46.64	AT4G38790.1	1.19e-163		ERD21_CAEEL	1.18e-29
TRINITY_DN10460_c0_g3_i2.p1	25.36	29.49	16.56	16.24	22.58	26.2	27.75	25.15	21.74	22.84	17.65	19.32	22.77	26.96	21.43	21.93	17.59	29.41	25.86	27.59	32.91	AT4G38790.1	2.24e-163		ERD21_CAEEL	1.62e-32
TRINITY_DN10461_c0_g1_i2.p1	0.43	0.56	0.18	0.37	0.82	0.43	0.43	0.88	0.58	0.78	0.33	0.5	1.2	1.46	1.08	0.84	0.63	0.49	0.97	0.21	0.19
TRINITY_DN10461_c0_g1_i4.p1	0.11	0.29	0.19	0.63	0.1	0.11	0	0	0	0.44	0.11	0.2	0.11	0.28	0.44	0.32	0.43	0.3	0.2	0.1	0
TRINITY_DN104633_c0_g2_i1.p1	5.06	3.21	4.94	4.23	6.01	6.08	4.92	9.6	7.57	6.43	7.55	5.24	7.15	8.41	8.26	8.21	8.73	8.27	12.29	9.95	9.01	AT1G75130.1	1.38e-171		C734A_ARATH	1.89e-142
TRINITY_DN10463_c0_g1_i1.p1	5.73	5.61	6.9	7.29	7.56	8.58	6.45	3.69	8.2	9.67	8.25	8.58	9.84	7.39	16.28	10.63	15.01	17.17	26.17	16.6	15.45	AT5G14540.1	2e-54
TRINITY_DN10463_c0_g2_i1.p1	17.03	14.88	13.13	9.67	14.85	13.81	12.68	17.53	18.89	15.27	14.65	14.46	20.77	18.23	27.18	24.75	21.01	19.13	24.38	17.56	14.85	AT5G14540.1	1.73e-52
TRINITY_DN10463_c0_g2_i2.p2	1.05	0	0	0	0	0	0	0.41	0	1.04	0	0.5	0	0	0	0.47	0	0	0	0	0	AT3G01560.1	6.01e-39
TRINITY_DN10464_c0_g1_i1.p1	43.53	42.4	48.83	39.01	51.17	45.03	42.17	59.84	53.85	78.91	89.63	75.62	78.46	57.11	61.3	65.58	65.33	71.7	68.61	68.82	48.11	AT5G01590.1	0	Protein TIC 56, chloroplastic [Source:UniProtKB/Swiss-Prot;Acc:Q7Y1W1]	TIC56_ARATH	0
TRINITY_DN104650_c0_g1_i1.p1	0	0	0	0	0	0	0	0	0	0	0	0	0	0	0	0	0	0	0	0	0
TRINITY_DN104650_c0_g2_i3.p1	0	0	0	0	0.6	0	0	0.19	0.22	0	0	0	0	0	0.21	0.21	0	0	0.19	0	0
TRINITY_DN104650_c0_g3_i1.p1	0.42	0	0.36	0.5	0	0.45	0	0	0	0	0	0	0	0	0	0	0	0	0	0	0
TRINITY_DN10465_c3_g2_i4.p1	9.74	4.98	4.19	7.63	5.22	7.87	9.32	9.61	17.73	11.41	8.82	23.18	7.41	14.8	19.74	26.7	28.84	19.37	26.09	21.21	32.18	AT4G23140.1	4.87e-43	Cysteine-rich receptor-like protein kinase 6 [Source:UniProtKB/Swiss-Prot;Acc:Q9C5S9]	CRK6_ARATH	4.79e-42
TRINITY_DN10466_c0_g1_i11.p1	2.79	1.66	0.99	0.59	2.43	1.66	1.98	2.43	1.36	1.71	1.69	1.19	3.14	2.32	3.41	2.86	3.48	3.23	3.67	2.02	2.4	AT1G08070.1	1.02e-156	Pentatricopeptide repeat-containing protein At1g08070, chloroplastic [Source:UniProtKB/Swiss-Prot;Acc:Q9LN01]	PPR21_ARATH	1e-155
TRINITY_DN104693_c0_g1_i1.p1	0	0	0	0	0	0	0	0	0	0	0	0	0	0	0	0	0	0	0.82	0	2.38				FHP_CANAL	1.32e-07
TRINITY_DN10469_c0_g1_i1.p1	0	0.34	0	0	0.73	0.4	0	0	0	0	0	0.34	0.4	0	0	0	0	0.34	0	0	0.32	AT4G23160.2	1.4e-53		POLR1_ARATH	2.33e-50
TRINITY_DN1046_c0_g1_i2.p1	8.06	8.2	10.12	7.52	9.82	9.28	8.79	10.49	14.74	13.97	11.14	12.33	15.05	11.66	18.04	13.71	15.21	14.72	24.38	16.33	17.52	AT3G63500.1	1.35e-148	Protein OBERON 4 [Source:UniProtKB/Swiss-Prot;Acc:Q84TI3]	OBE4_ARATH	1.53e-144
TRINITY_DN104704_c0_g1_i1.p1	0	0	0	0	0	0	0	0	0	0	0	0	0	0	0	0	0	0	0	0	0
TRINITY_DN10471_c1_g1_i1.p1	0	0	0	0	0	1.28	0	0	0	1.02	1.42	0.66	0	0.66	0	0	1.13	0	0.58	1.16	0	AT2G47850.4	2.62e-24	Zinc finger CCCH domain-containing protein 32 [Source:UniProtKB/Swiss-Prot;Acc:Q84W91]	C3H6_ORYSJ	4.06e-24
TRINITY_DN10472_c0_g2_i3.p1	5.47	8.13	6.89	4.03	6.95	8.08	6.21	6.69	6.01	9.27	4.69	4.12	10.85	9.33	10.02	5.61	7.47	6.47	8.78	10.99	9	AT3G24820.1	4.15e-43
TRINITY_DN104740_c0_g1_i1.p1	0	0	0	0	0	0	0	0	0	0.41	0	0	0	0	0	0	0	0	0	0	0	AT1G18660.4	8.71e-71		LONF1_MOUSE	4.39e-22
TRINITY_DN10474_c0_g2_i1.p1	2.08	2.07	2.2	2.18	3.57	2.64	3.09	2.99	5.03	3.91	0.99	2.96	4.58	5.03	9.77	4.64	7.05	3.57	3.78	4.25	4.48	AT1G03055.1	6.46e-72	Beta-carotene isomerase D27, chloroplastic [Source:UniProtKB/Swiss-Prot;Acc:Q7XA78]	D27_MEDTR	4.91e-104
TRINITY_DN10476_c0_g1_i1.p1	42.87	39.33	78.04	60.2	48.36	26.93	23.61	17.54	42.28	65.6	56.69	74.73	45.48	23.85	12.97	21.31	38.6	43.33	35.17	16.97	12.94	AT5G10770.1	3.81e-57	Aspartyl protease family protein At5g10770 [Source:UniProtKB/Swiss-Prot;Acc:Q8S9J6]	ASPA_ARATH	3.75e-56
TRINITY_DN104778_c0_g1_i1.p1	0	0	0	0	0	0	0	0	0	0	0	0.72	0	0	0	0	0.52	0	0.95	1.02	0	AT3G46730.1	1.08e-11	Putative disease resistance RPP13-like protein 3 [Source:UniProtKB/Swiss-Prot;Acc:Q9STE7]	R1A6_SOLDE	3.13e-11
TRINITY_DN104780_c0_g2_i1.p1	0	0	0	0	0	0	0	0.49	0	0	0	0	0	0	0	0	0	0.47	0	0	0				TRAG5_ECOLX	9.02e-26
TRINITY_DN1047_c0_g1_i7.p1	204.71	251.27	177.98	204.26	202.74	251.41	289.23	364.23	258.22	250.74	216.07	274.34	257.13	264.74	389.68	376.08	374.49	358.06	317.92	387.05	372.16	AT3G47650.1	7.54e-36		BSD2_ARATH	7.42e-35
TRINITY_DN104801_c1_g1_i2.p1	0	0.39	0	0.52	0.64	0	0	0.2	0.48	0	0.47	0	0	0	0	0	0.22	0.2	0	0	0
TRINITY_DN10480_c0_g1_i1.p1	11.87	16.28	3.29	1.24	1.22	5.69	5.87	5.86	5.98	2.73	1.35	2.52	0.44	4.96	4.69	4.24	3.54	2.5	1.54	1.84	3.37	AT3G58710.2	2.18e-52	Probable WRKY transcription factor 69 [Source:UniProtKB/Swiss-Prot;Acc:Q93WV5]	WRK69_ARATH	2.15e-51
TRINITY_DN10480_c0_g2_i1.p1	0.68	1.68	2.47	2.21	2.61	2.64	2.07	2.24	2.2	3.2	3.69	4.03	2.37	2.8	2.75	2.15	3.2	4.69	4.43	3.41	3.64	AT2G23320.1	1e-65	Probable WRKY transcription factor 15 [Source:UniProtKB/Swiss-Prot;Acc:O22176]	WRK15_ARATH	9.83e-65
TRINITY_DN104816_c0_g1_i1.p1	0.05	0.3	0.21	0.34	0.09	0.29	0.1	0	0.26	0.32	0.55	0.5	0.05	0.08	0	0.1	0.19	0.13	0.13	0	0.09	AT1G67040.2	4.33e-32
TRINITY_DN10481_c1_g1_i1.p1	0	2.86	0	0	0.5	0.55	0	0.48	0	0.4	1.75	0	0.56	0.46	1.01	1.59	0	0.46	1.86	0	0.43	AT5G08510.1	1.37e-40	Pentatricopeptide repeat-containing protein At5g08510 [Source:UniProtKB/Swiss-Prot;Acc:Q9FNN7]	PP371_ARATH	1.35e-39
TRINITY_DN104843_c0_g1_i1.p1	0.61	0	0	0	0	0	0	0	0	0	0	0	0	0	0	0	0	0	0	0	0	AT4G24550.2	4.66e-80	AP-4 complex subunit mu [Source:UniProtKB/Swiss-Prot;Acc:Q9SB50]	AP4M_ARATH	4.58e-79
TRINITY_DN10485_c0_g1_i1.p1	1.05	0.41	0.74	3.13	0.77	0.49	1.3	1.54	1.01	2.08	2.54	1.03	2.21	2.2	2.75	0.92	2.47	1.02	2.7	0	0.43
TRINITY_DN10485_c0_g2_i2.p1	5.68	4.27	8.72	4.74	6.8	6.32	7.66	8.99	10.92	6.58	5.84	7.8	7.89	6.09	10.75	9.1	13.02	11.5	16.37	11.35	11.01	AT1G69360.1	2.25e-20
TRINITY_DN10486_c0_g1_i1.p1	81.14	151.93	68.92	32.24	37.27	38.37	58	45.05	133.02	53.94	23.51	35.41	46.14	97.19	45.05	132.72	95.79	39.25	28.9	33.42	48.83	AT5G57660.1	2.01e-86	Zinc finger protein CONSTANS-LIKE 5 [Source:UniProtKB/Swiss-Prot;Acc:Q9FHH8]	COL5_ARATH	1.98e-85
TRINITY_DN10489_c2_g1_i1.p1	0.44	0	0.76	0	0	0	0	0	0	0	0.5	0.79	0	0	0	0.46	0.44	0	0	0	0	AT4G23160.2	3.33e-15		POLR1_ARATH	2.55e-10
TRINITY_DN1048_c0_g2_i3.p1	0.84	2.82	2.91	2.47	3.05	2.18	1.95	2.92	5.49	4.25	3.36	3.48	1.97	3.65	1.06	1.68	4.14	5.17	4.01	1.43	2.98	AT4G23620.1	1.5e-98		RL25_NOVAD	1.84e-17
TRINITY_DN104904_c0_g1_i1.p1	1.35	0.72	0	0.79	0.91	1.52	1.1	0.62	0.88	0.88	0.57	2.01	2.08	0.35	0.96	0.27	0.4	0.62	0.49	0.52	0.36	ATMG00860.1	2.9e-28	Uncharacterized mitochondrial protein AtMg00860 [Source:UniProtKB/Swiss-Prot;Acc:P92523]	POL2_DROME	9.57e-94
TRINITY_DN104906_c0_g1_i1.p1	0	0	0	0	0	0	0	0	0	0	0.45	0	0	0	0	0	0	0	0	0	0	AT4G24750.1	2.06e-78	Rhodanese-like domain-containing protein 11, chloroplastic [Source:UniProtKB/Swiss-Prot;Acc:Q0WWT7]	STR11_ARATH	2.03e-77
TRINITY_DN10490_c0_g1_i3.p1	3.24	4	2.73	2.94	1.76	4.26	5.39	3.84	3.4	3.15	2.98	3.43	4	3.44	3.2	2.93	3.61	3.27	3.72	3.13	4.26	AT1G58290.1	0	Glutamyl-tRNA reductase 1, chloroplastic [Source:UniProtKB/Swiss-Prot;Acc:P42804]	HEM11_CUCSA	0
TRINITY_DN10490_c0_g2_i1.p2	195.05	171.95	163.1	184.36	180.74	148.11	142.94	173.09	179.21	204.18	203.64	158.11	156.98	167.35	113.08	193.87	169.29	173.94	100.7	134.96	123.41	AT5G64480.1	5.42e-23
TRINITY_DN10491_c0_g2_i2.p1	7.38	4.94	6.51	7.37	6.51	6.17	3.98	6.23	6.68	7.95	7.1	5.57	6.03	6.09	2.13	6.27	6.51	6.71	4.5	2.77	2.55	AT2G38660.3	2.41e-141	Bifunctional protein FolD 1, mitochondrial [Source:UniProtKB/Swiss-Prot;Acc:A2RVV7]	FOLD1_ARATH	2.37e-140
TRINITY_DN10491_c1_g2_i1.p1	3.22	2.42	1.62	0.63	1.04	1.96	1.39	2.74	1.17	2.37	2.89	1.95	2.53	2.11	5.12	2.16	1.85	2.44	3.17	3.9	4.47	AT2G26810.1	9.94e-102		MT21A_HUMAN	6.33e-13
TRINITY_DN104928_c0_g2_i1.p1	0	0	0	1.52	1.83	2.05	0	0	1.38	0.96	0.73	0	0	0	1.22	2.62	0.62	0	2.26	0.6	0
TRINITY_DN10492_c2_g1_i1.p1	0.15	0.13	1.03	0.69	0.43	0	0	0	0.32	0.6	1.71	0.41	0.3	0	0.15	0	0.15	1.35	0.81	0	0.26	AT4G21200.1	7.46e-140	Gibberellin 2-beta-dioxygenase 8 [Source:UniProtKB/Swiss-Prot;Acc:O49561]	G2OX8_ARATH	7.33e-139
TRINITY_DN10493_c0_g1_i4.p1	0.91	5.04	8.21	3.27	1.33	4.38	5.77	5.53	9.5	4.98	3.57	8.84	3.43	9.3	9.9	8.89	6.27	5.75	11.54	7.47	11.21
TRINITY_DN10493_c1_g2_i3.p1	0.68	0	0.79	0.53	0.44	0	0	0.21	0.74	0.37	0.24	0	0.24	0.4	0	0.23	0.89	0.62	0	0.44	0.4
TRINITY_DN10495_c1_g3_i1.p1	7.66	10.44	10.55	9.45	9.18	8.9	8.24	17.55	20.15	13.74	12.82	13.44	13.33	17.55	21.92	21.75	19.61	23.73	22.74	17.11	21.54	AT5G02820.1	0	DNA topoisomerase 6 subunit A [Source:UniProtKB/Swiss-Prot;Acc:Q9LZ03]	TOP6A_ARATH	0
TRINITY_DN104961_c0_g1_i1.p1	5.29	4.65	7.57	4.46	6.82	7.91	7.96	6.6	7.36	5.73	6.47	6.54	7.54	8.47	21.05	13.07	16.5	15.22	21.23	18.39	16.85	AT4G02050.2	0	Sugar transport protein 7 [Source:UniProtKB/Swiss-Prot;Acc:O04249]	STP7_ARATH	0
TRINITY_DN104968_c0_g1_i1.p1	0	0.16	0	0	0.17	0	0	0.16	0	0	0	0	0.18	0	0	0	0	0	0	0	0	AT5G07350.1	6.07e-142		TSN1_ARATH	5.97e-141
TRINITY_DN104980_c0_g2_i1.p1	0	0	0	0	0.25	0.27	0	0	0	0	0	0	0	0.23	0	0	0.51	0	0	0.25	0
TRINITY_DN104992_c0_g1_i1.p1	0	0	0	0	0	0	0	0	0	0	0	0	0	0	0	0	0	0	0.53	0	0.48
TRINITY_DN104997_c1_g2_i1.p1	0.26	0.35	0.11	0.15	0.25	0.13	0.8	0.24	0.14	0.11	0.41	0.37	0.13	0.45	0	0	0	0.12	0	0	0.24	AT1G09450.1	9.64e-144	Serine/threonine-protein kinase haspin homolog [Source:UniProtKB/Swiss-Prot;Acc:O80528]	HASP_ARATH	9.48e-143
TRINITY_DN10499_c0_g1_i4.p1	1.09	1.48	2	1.18	1.3	1.37	0.68	2.23	1.75	1.78	1.33	2.1	1.99	2.08	2.41	2.66	2.79	3.4	3.19	2.36	2.7	AT3G60310.2	4.56e-107
TRINITY_DN105004_c0_g1_i1.p2	0	0	0	0	0	0	0	0	0	0	0	0	0	0	0	0	0	0	0	0	0	AT1G11160.3	9.24e-14		POF11_SCHPO	1.36e-17
TRINITY_DN10500_c0_g2_i1.p1	0.62	0.82	0.94	0.72	1.34	2.85	1.42	1.42	1.67	1.38	0.81	3.14	3.66	3.73	8.12	9.21	4.1	10.41	22.13	8.67	11.99	AT4G11070.1	3.63e-38	Probable WRKY transcription factor 41 [Source:UniProtKB/Swiss-Prot;Acc:Q8H0Y8]	WRK41_ARATH	3.57e-37
TRINITY_DN105037_c0_g1_i1.p1	1.52	0.35	0.66	0.45	1.85	0	0.8	1.07	0.42	0.9	3.37	0.34	1.63	1.68	0	0	0	0.69	0	0	0.66	AT5G54970.1	9.03e-09
TRINITY_DN10503_c0_g1_i12.p1	0.35	0.92	0.75	0.4	1.33	1.77	0.7	2.22	1.12	1.12	1.09	0.48	0.71	1.19	0.7	1.03	0.68	0.63	1.41	1.33	0.15
TRINITY_DN10504_c1_g4_i1.p1	27.88	36.85	3.29	5.3	18.16	39.81	38.06	25.78	12.1	3.82	5.65	8.6	17.38	19.67	3.23	7.4	7.56	2.96	5.96	0	4.13	AT2G40435.1	2.16e-37
TRINITY_DN105055_c0_g2_i1.p1	0	0	0	0	0	0	0	0	0	0	0	0	0.21	0	0.2	0.2	0.2	0.18	0	0	0
TRINITY_DN10505_c5_g1_i2.p1	0	0.42	0.79	0	0.45	0	0	0	0	0.36	0	0.81	0	0.41	0	0	0	0	0.42	0	0	AT5G20480.1	1.97e-22	LRR receptor-like serine/threonine-protein kinase EFR [Source:UniProtKB/Swiss-Prot;Acc:C0LGT6]	EFR_ARATH	1.94e-21
TRINITY_DN10505_c6_g1_i1.p1	1.45	0.92	3.03	1.94	8.75	6.82	8.25	9.9	12.32	5.66	4.51	19.12	14.98	7.87	14.75	29.07	29.42	46.13	48.82	16.96	12.22	AT3G47570.1	4.45e-53	Probable LRR receptor-like serine/threonine-protein kinase At3g47570 [Source:UniProtKB/Swiss-Prot;Acc:C0LGP4]	XA21_ORYSJ	1.19e-62
TRINITY_DN105072_c0_g1_i1.p1	0.48	0	0	0	0	0	0	0	0	0	0	0.42	0	0	0	0	0	0	0.43	0	0	AT4G23160.2	7.55e-26		POLR1_ARATH	3.38e-42
TRINITY_DN10507_c0_g2_i1.p1	7.58	5.97	6.95	5.07	8.04	9.24	8.14	10.84	7.56	9.92	11.34	9.71	10.09	9.35	9.42	7.94	7.78	8.36	13.72	8.99	9.27	AT1G10700.1	0	Ribose-phosphate pyrophosphokinase 3, chloroplastic [Source:UniProtKB/Swiss-Prot;Acc:Q93Z66]	KPRS3_SPIOL	0
TRINITY_DN105087_c0_g1_i1.p1	0	0.16	0	0.21	0	0	0	0	0	0	0	0	0	0.16	0	0	0	0.16	0	0.18	0	AT3G47570.1	7.51e-70	Probable LRR receptor-like serine/threonine-protein kinase At3g47570 [Source:UniProtKB/Swiss-Prot;Acc:C0LGP4]	Y3475_ARATH	7.39e-69
TRINITY_DN10508_c0_g1_i2.p1	18.79	19.71	23.26	23.3	23.45	22.09	21.31	23.76	28.17	26.99	23.61	26.28	26.56	25.97	28.9	30.64	32.52	31.4	42.1	36.06	34.61	AT5G67320.1	0		HOS15_ARATH	0
TRINITY_DN1050_c3_g1_i1.p2	5.54	8.36	2.66	4.37	6.85	6.46	7.99	3.71	5.04	4.42	5.01	8.35	7.14	9.17	9.85	6.85	9.39	6.7	5.86	6.25	4.55
TRINITY_DN1050_c3_g1_i2.p2	1.64	2.56	1.88	1.99	2.67	1.19	1.76	3.09	0.61	2.54	1.88	2.39	5.4	3.93	3.77	1.71	3.78	3.46	4.97	2.12	3.21
TRINITY_DN1050_c3_g2_i1.p1	7.68	4.76	6.21	6.19	6.96	7.96	11.03	9.55	9.63	5.74	7.76	7.72	7.13	10.06	12.8	10.19	10.08	10.26	11.49	3.79	5.87	AT5G08020.1	5.44e-26	Replication protein A 70 kDa DNA-binding subunit B [Source:UniProtKB/Swiss-Prot;Acc:Q9SD82]	RFA1B_ARATH	5.35e-25
TRINITY_DN1050_c4_g1_i4.p1	0	0	0	0	2.45	0	0.44	1.18	0.46	0.99	0	0.75	0.45	0.75	0.42	2.59	0.41	1.52	1.53	0	0	AT4G23160.2	3.37e-42		POLR1_ARATH	2.13e-38
TRINITY_DN105101_c0_g1_i1.p1	0	0	0.39	0	0.44	0	0	0	0	0.36	0	0	0	0	0	0	0	0	0	0	0	AT5G08680.1	3.98e-83	ATP synthase subunit beta-3, mitochondrial [Source:UniProtKB/Swiss-Prot;Acc:Q9C5A9]	ATPB_DROME	3.21e-101
TRINITY_DN105126_c0_g2_i1.p1	1.87	0.96	2.3	0.31	1.55	0.28	0	0.74	1.74	0.64	0.29	0.73	0.28	0.93	0.27	0	0.53	0	0	0	0.47	AT4G21020.1	2.64e-18		DRPF_CRAPL	3.16e-09
TRINITY_DN105126_c0_g3_i1.p1	0.35	0	0.3	0	0	1.47	0	0	0	0	0	0	0	0	0.35	0	0	0	0	0.34	0	AT5G44310.1	2.56e-19
TRINITY_DN10512_c0_g1_i1.p1	73.87	63.57	62.11	48.31	67.38	68.31	56.66	85.94	60.98	72.83	80.7	88.97	102.5	95.62	120.35	99.27	92.64	106.14	117.07	105.45	103.12	AT5G48960.1	0		5NTC_DICDI	1.89e-58
TRINITY_DN10512_c0_g1_i4.p2	0	0	0.66	1.1	0	1.77	0	0	0.81	0	1.44	2.27	2.59	3.13	1.7	4.71	4.57	2.45	2.95	7.52	11.77	AT5G48960.1	7.89e-45
TRINITY_DN10512_c0_g1_i7.p1	1.42	1.34	2.89	1.52	1.45	0.46	0	5.5	1.94	1.84	4.32	3.07	3.06	0.4	1.71	3.46	1.62	1.8	2.47	5.31	1.95	AT5G48960.1	0		5NTC_DICDI	3.44e-54
TRINITY_DN10512_c0_g2_i1.p1	0	0	0.62	0	0	0	0	0	0	0	1.42	0	0	0	0	2.31	0	1.82	0	0	0	AT5G48960.1	5.24e-102		5NTC_DICDI	2.27e-15
TRINITY_DN10513_c1_g2_i1.p1	18.54	23.72	19.81	12.95	27.47	14.69	16.89	18.57	17.43	18.28	27.83	22.05	16.68	16.71	19.35	20.53	15.54	28.91	25.01	22.3	30.6	AT4G17010.1	2.49e-39
TRINITY_DN105143_c0_g2_i1.p1	0	0	0	0	0	0	0	0.59	0.34	0.5	0.34	0	0	0.28	0.31	0	0	0	0.57	0	0.55	AT4G29090.1	1.56e-32		M310_ARATH	1.93e-28
TRINITY_DN105143_c1_g1_i2.p1	0.39	0.17	0	0	0	0.6	0	0.18	0.84	0	0	0	0	0.67	0.97	0.39	0.38	0	1.75	0.19	0.34	AT4G29090.1	1.92e-43		M310_ARATH	6.99e-30
TRINITY_DN10515_c0_g2_i1.p1	0	0	1.38	0.94	0	0	0.22	2.05	0	2.9	0	0	0.8	2.6	2.23	0.74	0.76	0.7	0	2.9	0	AT1G26550.1	5.44e-67		PIN4_BOVIN	4.9e-23
TRINITY_DN10515_c0_g2_i4.p1	178.11	174.19	168.29	147.64	178.09	204.09	182.94	240.11	196.1	176.52	201.69	189.42	181.55	196.78	239.35	266.06	219.91	238.87	239.87	252.33	270.67	AT1G26550.1	2.06e-71		PIN4_BOVIN	2.25e-24
TRINITY_DN10516_c0_g1_i1.p1	3.62	3.94	2.93	3.08	2.95	2.7	3.28	3.09	4.53	4.87	5.42	3.39	3.54	3.94	4.4	4.94	5.52	5.35	7.08	4.58	4.4	AT5G08430.2	7.48e-36	Uncharacterized protein At5g08430 [Source:UniProtKB/Swiss-Prot;Acc:Q9FT92]	Y5843_ARATH	5.76e-34
TRINITY_DN105179_c0_g1_i1.p1	0.33	0.9	0	0	0.64	0	0.69	0	0.72	0.26	0	0	0	0	0.33	0	0	0.3	0	0.32	0
TRINITY_DN105199_c0_g1_i1.p1	0	0	0	0	0	0	0	0	0	0	0	0	0	0	0	0	0	0.36	1.09	0	0
TRINITY_DN1051_c0_g1_i3.p1	14.21	13.14	17.5	9.04	12.87	12.59	20.54	10.82	11.01	9.27	9.37	12.55	13.73	17.85	4.61	7.43	12.23	9.51	6.43	5.18	10.9	AT4G39170.1	4.1e-133	Phosphatidylinositol/phosphatidylcholine transfer protein SFH6 [Source:UniProtKB/Swiss-Prot;Acc:F4JVA6]	SFH6_ARATH	4.04e-132
TRINITY_DN1051_c1_g2_i1.p1	64.92	61.62	87.17	64.38	62.63	67.7	61.75	83.24	78.47	91.83	89.51	96.78	83.32	78.99	81.12	95.12	90.24	89.84	86.1	96.16	100.65	AT5G35590.1	3.06e-08	Proteasome subunit alpha type-6-A [Source:UniProtKB/Swiss-Prot;Acc:O81146]	PSA6_SOYBN	2.96e-07
TRINITY_DN1051_c1_g3_i2.p1	4.68	4.88	1.78	1.77	2.89	3.49	2.91	4.74	4.15	4.36	3.84	6.23	4.74	4.98	5.56	5.66	4.89	5.64	6.92	4.62	6.87				PSA6_TOBAC	2.95e-06
TRINITY_DN1051_c1_g3_i3.p1	67.09	59.33	86.99	64.08	71.76	62.43	65.09	85.6	86.03	79.25	76.15	78.51	55.49	69.66	102.35	114.54	90.67	85.55	104.03	111.13	128.35	AT2G05840.1	1.44e-08	Proteasome subunit alpha type-6-B [Source:UniProtKB/Swiss-Prot;Acc:O81147]	PSA6B_ARATH	1.42e-07
TRINITY_DN1051_c2_g1_i1.p1	4.94	6.89	2.77	2	4.65	7.42	7.77	7.31	6.34	3.58	2.68	4.53	6.77	8.82	18.44	14.82	11.15	10.61	15.66	13.26	13.37	AT3G16785.1	0	Phospholipase D zeta 1 [Source:UniProtKB/Swiss-Prot;Acc:Q9LRZ5]	PLDZ1_ARATH	0
TRINITY_DN1051_c5_g1_i1.p1	4.14	4.59	4.91	7.55	9.3	6.64	5.93	4.77	15.96	7.8	8.61	8.59	6.52	9.09	6.78	8.17	10.67	5.7	11.83	9.25	11.62
TRINITY_DN1051_c5_g1_i5.p1	0	0	0	0	0	0.77	0.32	0	0	0	0	1.78	0	0.59	0.82	0	0	0	0.76	0	0.84
TRINITY_DN10520_c0_g1_i1.p1	13.72	12.98	13.25	6.6	10.76	9.85	11.51	12.31	13.25	11	11.96	11.14	13.77	15.54	13.91	17.19	16.43	14.84	18.22	9.04	14.67	AT2G20810.1	0	Probable galacturonosyltransferase 10 [Source:UniProtKB/Swiss-Prot;Acc:Q9SKT6]	GAUTA_ARATH	0
TRINITY_DN105216_c0_g1_i1.p1	5.43	7.08	4.84	3.17	5.71	6.62	10.21	10.93	10.3	10.04	6.25	7.67	12.42	11.71	15.07	13.5	12.34	12.96	19.99	10.17	8.75	AT3G13300.2	1.7e-48	Enhancer of mRNA-decapping protein 4 [Source:UniProtKB/Swiss-Prot;Acc:Q9LTT8]	VCS_ARATH	1.91e-47
TRINITY_DN105219_c0_g1_i1.p1	0.54	0	0	0	0	0	0	0	0	0	0	0	0	0.24	0	0.27	0	0	0	0	0.24
TRINITY_DN10521_c1_g1_i11.p1	1.08	0.85	0.43	0.42	0.38	0.23	0.32	0.3	0.61	0.85	1.01	0.66	0	0.72	1.15	1.45	0.92	0.64	0.82	0.54	0	AT3G24240.1	4.93e-148	Receptor-like protein kinase 2 [Source:UniProtKB/Swiss-Prot;Acc:Q9LHP4]	RGI1_ARATH	4.85e-147
TRINITY_DN10521_c1_g1_i11.p2	1.51	0.5	0.33	0.22	0.55	0.19	0.58	0.35	0.2	0.15	0.4	0.35	0.59	0	0.19	0.75	0.56	0.17	0	0.37	0.17	AT3G24240.1	1.58e-114	Receptor-like protein kinase 2 [Source:UniProtKB/Swiss-Prot;Acc:Q9LHP4]	RGI1_ARATH	1.55e-113
TRINITY_DN10521_c1_g1_i6.p1	0.69	1.23	0.33	0.58	0.15	0.73	0.54	1.51	0.68	0	0.28	0.47	1.87	0.24	0.64	0.74	0.89	0.45	0.48	0.12	0.64	AT3G24240.1	1.48e-173	Receptor-like protein kinase 2 [Source:UniProtKB/Swiss-Prot;Acc:Q9LHP4]	RGI1_ARATH	1.46e-172
TRINITY_DN105248_c0_g1_i3.p1	0	0	0	0	0	0	0	0	0	0	0	0	0	0	0	0	0	0	0	0	0
TRINITY_DN105248_c2_g1_i1.p1	0	0.42	0	0	0	0	0	0	0	0	0	0	0	0	0	0	0	0.42	0.83	0	0
TRINITY_DN105258_c0_g1_i1.p1	0	0	0	0.37	0.3	0	0	0	0	0	0	0	0	0	0	0	0	0	0	0	0	AT5G62670.1	1.61e-144	ATPase 11, plasma membrane-type [Source:UniProtKB/Swiss-Prot;Acc:Q9LV11]	PMA2_SOLLC	6.85e-145
TRINITY_DN10525_c0_g2_i2.p1	1.67	1.15	0.36	0.5	0.81	1.78	0	0.78	0	0.33	1.39	2.22	3.13	1.11	0.41	1.71	0.41	0.38	1.51	2.01	0	AT4G31500.1	7.59e-16	Cytochrome P450 83B1 [Source:UniProtKB/Swiss-Prot;Acc:O65782]	C71DC_CATRO	6e-40
TRINITY_DN10525_c0_g2_i5.p1	2.2	0.33	0.32	0.87	0.71	0.78	1.54	2.39	0	0.58	0.4	0.33	2.34	1.29	0	1.87	1.81	0.33	0.33	0.35	0	AT3G26330.1	6.93e-67	Cytochrome P450 71B37 [Source:UniProtKB/Swiss-Prot;Acc:Q9LIP3]	C71DA_SOYBN	2.29e-86
TRINITY_DN105269_c1_g1_i1.p1	6.23	8.83	14.98	9.12	7.32	3.42	1.35	8.85	15.92	23.95	24.7	13.46	7.6	5.08	14.65	7.86	12.92	23.58	21.5	25.91	19.65	AT3G23580.1	1.23e-69	Ribonucleoside-diphosphate reductase small chain A [Source:UniProtKB/Swiss-Prot;Acc:P50651]	RIR2A_ARATH	1.21e-68
TRINITY_DN105274_c0_g1_i3.p1	0	0.21	0.2	0.28	0.46	0	0	0	0.26	0	0.25	0.22	0	0.41	0	0.24	0.23	0	0	0	0	AT5G48050.1	1.43e-06		POLR1_ARATH	8.36e-06
TRINITY_DN105274_c0_g4_i1.p1	0	0.29	0.42	0	0	0	0	0	0	0.13	0.17	0	0	0.14	0	0	0.48	0.15	0.15	0.31	0				POLR2_ARATH	3.32e-53
TRINITY_DN105274_c1_g1_i3.p1	0	0	0	0	0	0	0	0	0.68	0	0	0	0	0	0.6	0	0	0	1.67	0	0	AT1G34070.1	1.62e-08		POLR1_ARATH	3.69e-11
TRINITY_DN10527_c0_g1_i4.p1	10.36	11.12	6.22	4.22	5.88	5.65	8.33	8.34	9.2	8.62	5.75	8.13	9.37	9.6	12.05	10.58	12.32	12.22	15.54	12.41	12.85	AT3G19080.1	6.24e-105		UAF30_SCHPO	3.87e-19
TRINITY_DN10529_c0_g1_i3.p1	32.48	23.47	77.79	26.76	40.3	58.45	47.2	53.95	68.04	40.3	32.32	78.99	62.56	67.22	229.64	121.02	130.26	79.74	181.95	298.5	225.01	AT3G48240.1	9.74e-35
TRINITY_DN105304_c0_g1_i2.p1	0.08	0.3	0.59	0.2	0	0	0.43	0.47	0.37	0	0.09	0.16	0.17	0.87	0.43	0.67	0.17	0.15	0	0.08	0.15	AT1G43760.1	5.9e-38		LIN1_NYCCO	2.39e-20
TRINITY_DN105304_c0_g1_i2.p2	0.81	0.63	0.08	0	0	0.18	0.09	1.07	0.19	0	0.09	0.25	0.09	1.69	0.27	1.06	0.44	0.24	0.16	0.17	0	AT2G01050.1	1.39e-50
TRINITY_DN105306_c0_g2_i1.p1	0	0	0	0	0	0	0	0	0	0.37	0	0	0	0	0	0	0	0	0	0	0.4	AT5G63630.1	2.85e-41	DEAD-box ATP-dependent RNA helicase 31 [Source:UniProtKB/Swiss-Prot;Acc:Q9FFQ1]	RH25_ORYSJ	3.22e-78
TRINITY_DN10530_c0_g1_i6.p1	0.31	0.28	0.53	0	0	0.97	0.64	0.86	0	0.49	0.33	0.28	0.32	1.08	0.62	1.56	0	0.28	0.56	0	1.07
TRINITY_DN105335_c0_g1_i3.p1	0	0	0	0	0	0.38	0	1.66	0	0	0	0	0	0	0	0	0	0	0	0	0
TRINITY_DN10533_c0_g1_i1.p1	17.49	22.26	21.86	19.73	20.19	26.95	20.58	30.39	24.01	24.62	21.85	23.56	16.76	28.58	34.69	32.04	31	32.39	28.78	46.94	42.15	AT5G03560.1	6.7e-92		DJC28_MOUSE	1.07e-18
TRINITY_DN105348_c0_g1_i1.p2	0	0	0	0	0	0	0	0	0	0	0	0	0	0	0	0	0	0	0	0	0	AT5G58490.1	7.26e-49		PAR1_ROSHC	3.66e-31
TRINITY_DN105359_c0_g1_i1.p1	0.66	0.2	0	0	0.42	0	0	0	0.48	0	0.23	0	0	0.19	0	0	0	0.6	0	0	0	AT5G48050.1	7.49e-11		POLR1_ARATH	5.43e-12
TRINITY_DN10537_c0_g1_i2.p1	0.86	0.46	0.3	0	0.16	0.35	0.17	1.26	0.37	0	0	0	0.18	0.3	0	0.51	0	0	0.16	0	0.3	AT3G50130.1	1.35e-15		Y3720_ARATH	3.93e-10
TRINITY_DN10538_c0_g1_i11.p2	0	0	0.53	0	1.22	0.68	2.69	0	0	0	0	0.54	0	1.13	0.61	0	1.23	1.12	0	0	0
TRINITY_DN10538_c0_g1_i2.p1	0	0.57	0.14	0.38	0.47	0	0	0.15	0	0.13	0	0.15	0.17	0.28	0.33	0.64	0.16	0.29	0.73	0	0
TRINITY_DN10538_c1_g1_i5.p1	0	1.29	0.4	0	0	0	0	0	0	0.36	0	0	0.5	0	0	1.92	0	0.42	1.69	0.45	1.18
TRINITY_DN10538_c2_g1_i2.p1	0	0	0	0	0.25	0	0.26	0	0	0.2	0	0.23	0	0.22	0	0	0.25	0	0	0.25	0
TRINITY_DN1053_c0_g1_i3.p1	2.91	1.84	2.04	1.94	1.73	1.7	2.96	2.16	3	4.06	2.17	2.7	1.99	4.05	2.38	1.51	3.68	3.28	5.15	3.48	2.35	AT5G20590.2	1.04e-110	Protein trichome birefringence-like 5 [Source:UniProtKB/Swiss-Prot;Acc:F4K5K4]	TBL5_ARATH	5.16e-108
TRINITY_DN1053_c0_g1_i3.p2	3.86	3.2	3.63	1.25	3.74	3.7	2.2	0.98	2.68	3.34	4.23	2.21	3.35	2.47	3.15	3.92	5.18	4.13	4.77	5.77	6.07	AT5G20590.1	9.3e-79	Protein trichome birefringence-like 5 [Source:UniProtKB/Swiss-Prot;Acc:F4K5K4]	TBL5_ARATH	9.14e-78
TRINITY_DN1053_c0_g1_i9.p1	11.26	13.03	12.95	11.11	17.55	12.79	18.19	15.97	19.46	13.95	14.62	22.31	16.49	15.62	20.94	16.13	20.93	24.95	29.48	33.86	40.5	AT5G64200.1	8.01e-59	Serine/arginine-rich splicing factor SC35 [Source:UniProtKB/Swiss-Prot;Acc:Q9FMG4]	SC35_ARATH	7.88e-58
TRINITY_DN1053_c0_g2_i4.p1	127.12	157.04	168.21	121.43	135.79	134.69	129.73	191.11	190.07	188.17	204.9	188.99	217.17	189.79	275.52	231.45	250.4	213.73	251.01	243.7	187.37	AT5G17310.2	0	UTP--glucose-1-phosphate uridylyltransferase 1 [Source:UniProtKB/Swiss-Prot;Acc:P57751]	UGPA_SOLTU	0
TRINITY_DN1053_c0_g3_i1.p1	57.58	57.65	53.15	49.45	58.83	55.19	44.76	74.63	57.25	70.88	96.94	67.6	81.91	65.74	86.21	52.02	53.77	65.97	74.69	57.99	51.8	AT3G03250.1	0	UTP--glucose-1-phosphate uridylyltransferase 2 [Source:UniProtKB/Swiss-Prot;Acc:Q9M9P3]	UGPA_SOLTU	0
TRINITY_DN1053_c0_g3_i1.p2	4.81	3.36	3.69	1.26	4.38	2.22	3.31	6.18	4.94	2.78	6.32	3.15	2.51	3.72	2.68	3.76	5.78	4.36	2.9	1.81	0.93	AT4G38130.2	6.11e-149	Histone deacetylase 19 [Source:UniProtKB/Swiss-Prot;Acc:O22446]	HDA19_ARATH	6.22e-148
TRINITY_DN105405_c0_g1_i1.p1	0	0	0	0	0	0	0	0	0	0	0	0	0	0	0.18	0	0.17	0	0.16	0	0.31				POXI_PENOX	7.47e-21
TRINITY_DN10540_c0_g1_i1.p1	6.47	5.01	5.98	3.59	5.96	5.54	5.91	8.35	9.73	6.04	8.22	5.71	9.59	10.06	13.11	14.63	12.98	13.03	20.03	13.4	13.97	AT3G12280.2	0	Retinoblastoma-related protein 1 [Source:UniProtKB/Swiss-Prot;Acc:Q9LKZ3]	RBR_RICCO	0
TRINITY_DN10542_c0_g1_i2.p1	1.97	2.75	0.85	1.78	2.88	2.66	1.05	3.71	3.81	1.15	0	2.17	1.07	0.88	0.97	2.55	3.41	4.46	2.24	2.39	1.67	AT4G09920.5	1.01e-11	F-box protein At4g09920 [Source:UniProtKB/Swiss-Prot;Acc:Q9T0F1]	FB226_ARATH	9.98e-11
TRINITY_DN105434_c0_g1_i1.p1	1.31	0.73	1.7	1.34	0.47	0.34	0.67	0	0	0.27	0.69	0.45	0	0.28	0	0.65	0.48	0.45	0.74	0.16	0	AT1G40390.1	1.01e-06
TRINITY_DN105449_c0_g1_i1.p1	3.22	1.63	0.93	1.43	0.59	1.57	1.25	1.27	1.66	1.37	1.13	0.57	2.37	1.45	0.62	0.3	0.3	0.14	0	0	0	AT3G60220.1	7.85e-48	E3 ubiquitin-protein ligase ATL4 [Source:UniProtKB/Swiss-Prot;Acc:Q9LY41]	ATL4_ARATH	7.72e-47
TRINITY_DN10544_c0_g1_i1.p1	4.45	3.42	0.69	0.93	1.97	2.56	2.54	3.45	1.73	2.33	1.54	1.49	3.03	2.35	1.62	3.27	1.79	1.14	2.58	0.55	0.31				POLR2_ARATH	3.08e-41
TRINITY_DN10544_c1_g1_i3.p1	0.66	0.2	0.38	0	0	0.45	0.22	0.2	0.71	0.35	0	0.6	0	0.95	1.32	0.88	1.29	0.6	1.59	0.42	0.58				POLR2_ARATH	1.26e-15
TRINITY_DN10545_c0_g1_i3.p1	7.12	7.78	7.68	4.6	7.47	9.37	9.25	10.35	8.65	4.89	5.99	10.8	10.48	9.41	16	14.36	10.88	13.72	20.08	14.56	14.63	AT1G27200.1	0	Glycosyltransferase family 92 protein At1g27200 [Source:UniProtKB/Swiss-Prot;Acc:Q94K98]	Y232_RICCO	0
TRINITY_DN10546_c0_g1_i11.p1	1.97	0.92	5.09	1.78	2.88	0.53	2.1	3.24	2.18	0.77	3.91	1.3	4.29	1.32	1.46	3.06	4.38	3.57	5.37	1.91	2.09	AT5G53770.1	7.35e-47		TRF41_DROME	1.89e-13
TRINITY_DN1054_c0_g1_i1.p1	0.68	0.62	2.24	2.82	3.1	2.74	0.71	2.22	2.16	4.69	7.05	4.88	1.92	3.87	5.63	5.92	5.26	4.54	5.89	4.1	2.69
TRINITY_DN1054_c0_g1_i4.p1	30.13	26.14	24.65	19.42	25.01	20.35	21.26	28.2	28.79	34.21	41.32	31.25	30.92	28.81	39.16	45.95	42.36	44.55	47.41	21.62	27.66
TRINITY_DN1054_c0_g1_i5.p1	0.8	0.99	1.15	0.56	1.16	0.55	1.14	1.02	0.37	1.76	1.84	2.36	3.23	2.61	3.12	2.03	1.45	1.34	4.03	2.39	1.82
TRINITY_DN1054_c0_g2_i1.p1	1.41	0.44	0.81	2.26	1.83	2.53	3.99	3.09	5.7	4.41	4.24	2.91	4.58	6.29	7.44	7.76	5.56	3.82	5.55	4.55	4.79
TRINITY_DN1054_c0_g3_i1.p1	2.08	2.56	3.05	1.31	2.62	4.11	2.78	4.27	5.72	3.9	1.85	3.7	5.44	5.66	8.74	6.21	7.08	5.39	9.14	6.19	7.42
TRINITY_DN1054_c1_g1_i6.p1	16.64	13.45	7.15	6.22	10.65	10.82	14.98	11.37	9.47	6.97	8.17	9.31	15.08	11.93	15.39	9.8	9.27	9.37	8.39	12.31	7.2	AT3G42170.1	9.13e-38	Zinc finger BED domain-containing protein DAYSLEEPER [Source:UniProtKB/Swiss-Prot;Acc:Q9M2N5]	TRA1_MAIZE	2.85e-53
TRINITY_DN10550_c0_g2_i1.p1	6.13	6.95	3.69	7.48	11.41	2.02	5.3	9.87	6.81	8.5	16.42	7.43	7.47	5.55	13.83	11.59	16.96	11.61	20.61	8.31	12.24	AT3G03590.1	1.46e-34		TRI1_YEAST	1.32e-13
TRINITY_DN105511_c0_g1_i4.p1	6.79	5.78	5.29	4.73	6.3	7.49	5.62	8.51	8.07	8.03	5.64	7.47	7.63	8.25	13.76	9.72	10	8.76	14.45	12.58	11.27	AT3G56930.1	3.71e-165	Probable protein S-acyltransferase 4 [Source:UniProtKB/Swiss-Prot;Acc:Q9M1K5]	ZDH13_ARATH	3.65e-164
TRINITY_DN105526_c0_g1_i1.p1	0.48	0	0.98	0.19	0.31	0.17	0	0	0.17	0	0.17	0	0	0.28	0.65	0	0	0	0.59	0.78	0.72	AT4G14465.1	1.47e-66	AT-hook motif nuclear-localized protein 20 [Source:UniProtKB/Swiss-Prot;Acc:Q8GWQ2]	AHL20_ARATH	1.44e-65
TRINITY_DN10553_c0_g1_i1.p1	47.84	45.21	48.7	51.72	46.47	48.41	42.86	41.6	47.54	51.25	70.63	45	51.75	46.96	28.31	23.53	26.8	30	31.17	31.44	26.03	AT3G25860.1	0	Dihydrolipoyllysine-residue acetyltransferase component 4 of pyruvate dehydrogenase complex, chloroplastic [Source:UniProtKB/Swiss-Prot;Acc:Q9SQI8]	ODP24_ARATH	0
TRINITY_DN105551_c0_g1_i1.p1	33.72	36.83	25.01	26.13	37.2	52.59	41.59	43.02	38.89	33.38	38.39	33.85	29.93	41.16	34.01	26.15	24.5	26	29.72	40.83	55.59	AT2G18990.1	3.37e-113	Thioredoxin domain-containing protein 9 homolog [Source:UniProtKB/Swiss-Prot;Acc:O64628]	TXND9_ARATH	3.31e-112
TRINITY_DN10556_c0_g3_i2.p1	5.74	5.97	7.31	5.98	7.93	6.31	5.29	6.22	9.98	8.86	8.79	9.57	9.66	8.61	15.22	9.76	14.96	13.36	18.99	14.33	12.71	AT1G77140.1	0	Vacuolar protein sorting-associated protein 45 homolog [Source:UniProtKB/Swiss-Prot;Acc:O49048]	VPS45_ARATH	0
TRINITY_DN105598_c0_g1_i1.p1	0	0	0	0	0	0	0	0	0	0	0	0	0	0	0	0	0	0	1.53	0	0	AT5G45775.1	4.73e-74	60S ribosomal protein L11-2 [Source:UniProtKB/Swiss-Prot;Acc:P42794]	RL11_NEUCR	7.71e-85
TRINITY_DN10559_c0_g1_i1.p1	2.66	0.82	0	1.6	0	1.9	0	1.66	0	0.7	0.5	0	0.96	0.79	0.88	0.91	0.44	0.4	0.81	0	0				R1B14_SOLDE	3.13e-12
TRINITY_DN1055_c0_g1_i2.p1	21.86	14.7	14.29	13.08	15.84	12.69	15.88	14.75	16.08	16.94	16.38	15.95	16.21	15.78	13.27	13.4	17.29	13.47	12.58	14.11	15.38	AT1G02960.2	1.94e-22
TRINITY_DN1055_c0_g2_i1.p1	2.34	2.11	4.29	2.76	0.28	2.75	3.03	5.69	2.87	2.1	3.16	2.12	4.91	6.64	2.92	2.65	2.87	1.59	6.36	1.98	3.57	AT1G04410.1	2.17e-17	Malate dehydrogenase, cytoplasmic 1 [Source:UniProtKB/Swiss-Prot;Acc:P93819]	MDHC1_ARATH	2.13e-16
TRINITY_DN105606_c0_g1_i3.p1	0	0	0.42	0	0	0	1.55	0	0	1.52	0	0	1.06	0.87	0	0.5	0.96	0.88	0.44	0	2.06	AT1G69310.4	6.25e-47	Probable WRKY transcription factor 57 [Source:UniProtKB/Swiss-Prot;Acc:Q9C983]	WRK57_ARATH	6.15e-46
TRINITY_DN105611_c0_g1_i1.p1	0	0	0	0	0	0	0	0	0	0	0	0	0	0	0	0	0	0	0	0	0.33	AT1G12840.1	1.24e-76	V-type proton ATPase subunit C [Source:UniProtKB/Swiss-Prot;Acc:Q9SDS7]	VATC_HORVU	1.1e-75
TRINITY_DN105623_c0_g1_i1.p1	0	0	0	0	0	0	0	1.45	0	0.4	0	0.45	0.56	0	0	0	0	0	0	0	0
TRINITY_DN105623_c0_g2_i1.p1	0	0.29	0.28	0	0.16	0	0	0	0.53	0	0.17	0	0	0	0	0	0.16	0.3	0	0	0	AT4G23160.2	3.01e-93		POLR1_ARATH	4.17e-90
TRINITY_DN10562_c0_g1_i5.p1	3.94	11.71	9.91	9.2	17.12	6.15	6.11	5.67	12.61	22.6	14.05	25.41	12	7.83	8.81	7.15	9.25	19.76	20.47	11.75	12.63	AT5G47370.1	1.6e-94	Homeobox-leucine zipper protein HAT2 [Source:UniProtKB/Swiss-Prot;Acc:P46601]	HAT2_ARATH	1.58e-93
TRINITY_DN10564_c0_g1_i3.p1	11.75	9.4	7.23	6.81	7.68	9.21	11.64	14.81	8.76	7.09	8.01	5.84	14.31	15.4	12.05	11.62	6.75	9.3	10.13	10.92	9.1	AT3G61150.1	0	Homeobox-leucine zipper protein HDG1 [Source:UniProtKB/Swiss-Prot;Acc:Q9M2E8]	HDG1_ARATH	0
TRINITY_DN10565_c0_g3_i2.p1	6.89	6.13	5.58	3.71	5.35	5.07	5.27	7.12	8.8	6.79	7.6	6.2	8.44	7.27	11.15	10	10.27	7.96	12.06	7.47	6.55	AT4G24560.1	7.22e-162	Ubiquitin carboxyl-terminal hydrolase 16 [Source:UniProtKB/Swiss-Prot;Acc:Q9SB51]	UBP16_ARATH	7.1e-161
TRINITY_DN10568_c0_g1_i1.p1	8.19	5.78	5.12	3.96	5.08	6.56	7.92	8.21	8.31	11.9	6.04	8.3	10.44	10.06	18.11	8.97	11.75	8.83	19.05	10.11	8.12	AT1G03000.1	4.17e-102	Peroxisome biogenesis protein 6 [Source:UniProtKB/Swiss-Prot;Acc:Q8RY16]	PEX6_ARATH	4.11e-101
TRINITY_DN1056_c0_g1_i13.p1	16.69	15.62	14.43	8.47	15.62	13.94	15.86	18.44	20.23	15.32	14.11	17.48	20.11	22.48	27.22	25.1	24.7	25.07	31.19	31.67	32.3	AT2G45500.1	0		FIGL1_CAEBR	1.07e-109
TRINITY_DN105705_c0_g2_i1.p1	0.29	0.38	0.37	0	0.14	0.15	0.15	0.26	0.46	0.47	0	0	0	0.12	0.29	0.57	0.56	0.13	0.13	0	0.13	AT1G69490.1	9.45e-72	NAC transcription factor 29 [Source:UniProtKB/Swiss-Prot;Acc:O49255]	NAP2_SOLLC	1.05e-71
TRINITY_DN10570_c1_g2_i1.p1	2.25	2.64	2.9	2.73	2.75	1.22	5.43	2.12	3.73	4.35	1.94	2.45	2.47	3.04	4.98	1.76	1.66	5.07	0.51	2.72	2.35	AT3G23880.1	1.78e-07	F-box/kelch-repeat protein At3g23880 [Source:UniProtKB/Swiss-Prot;Acc:Q9LIR8]	FBK67_ARATH	1.75e-06
TRINITY_DN105718_c0_g1_i3.p1	0	0	0	3.04	0	0	0	0.59	0	0	0.73	0	0	0	0	0.65	1.23	0	0	0	1.55
TRINITY_DN105730_c0_g1_i1.p1	0	0	0	0	0	0	0	0	0	0.2	0	0	0	0	0	0	0	0.45	0.23	0	0	AT1G58520.2	7.97e-85	CSC1-like protein RXW8 [Source:UniProtKB/Swiss-Prot;Acc:F4IBD7]	CSCLA_ARATH	7.84e-84
TRINITY_DN105748_c0_g1_i2.p1	0	0	0	0	0	0	0	0	0	0	0	0	0	0	0	0	0	0	0	0	0.29
TRINITY_DN10577_c0_g1_i2.p1	39.44	40.27	14.18	12.32	31.69	63.21	83.36	84.52	42.85	29.56	15.89	34.82	64.4	55.98	71.67	38.05	21.22	31.98	60.43	89.63	121.92	AT3G51680.1	5.42e-129	Short-chain dehydrogenase reductase 2a [Source:UniProtKB/Swiss-Prot;Acc:Q9SCU0]	SDR2A_ARATH	5.34e-128
TRINITY_DN10577_c0_g1_i4.p2	0.59	0.55	1.01	0	1.72	1.28	5.05	4.44	1.95	0	2.72	4.08	6.47	1.59	1.73	4.3	2.32	1.59	7.46	4.54	8.32	ATCG01280.1	7.43e-10	Protein Ycf2 [Source:UniProtKB/Swiss-Prot;Acc:P56786]	YCF2_GOSBA	1.16e-11
TRINITY_DN10577_c0_g1_i5.p1	125.56	125.62	130.97	98.44	139.47	151.82	142.69	222.27	263.13	135.5	117.52	164.33	139.32	191.08	385.39	380.55	319.54	278.79	385.94	575.67	524.38	AT3G51680.1	1.46e-122	Short-chain dehydrogenase reductase 2a [Source:UniProtKB/Swiss-Prot;Acc:Q9SCU0]	SDR2A_ARATH	1.43e-121
TRINITY_DN10577_c1_g1_i10.p1	1.38	0.42	2.37	4.97	2.24	2.96	5.35	7.32	5.06	6.12	4.65	4.47	0.5	2.46	2.73	2.84	6.8	3.32	3.75	0.89	1.95	ATCG01280.1	8.19e-82	Protein Ycf2 [Source:UniProtKB/Swiss-Prot;Acc:P56786]	YCF2_DRIGR	1.31e-89
TRINITY_DN105799_c2_g1_i1.p1	0	0	0.53	0	0	0	0	0	0	0	0	0	0.69	0	0	0	0	0.56	0	0	0	AT4G23160.2	2.96e-30		POLR1_ARATH	1.43e-18
TRINITY_DN10579_c0_g1_i5.p1	54.71	45.46	37.22	43.99	45.6	53.89	53.45	50.75	64.33	41.23	32.96	45.74	48.76	53.3	82.24	70.81	76.01	71.91	76.78	140.71	121.83	AT1G23260.1	3.28e-75	Ubiquitin-conjugating enzyme E2 variant 1A [Source:UniProtKB/Swiss-Prot;Acc:Q93YP0]	UEV1A_ARATH	3.23e-74
TRINITY_DN10579_c0_g1_i8.p1	71.48	49.85	59.48	84.9	65.59	49.86	57.57	66.24	46.41	63.08	39.25	65.18	35.21	58.07	65.5	60.72	50.08	69.83	58.96	116.65	145.57	AT1G70660.1	8.77e-45	Ubiquitin-conjugating enzyme E2 variant 1B [Source:UniProtKB/Swiss-Prot;Acc:Q9CAB6]	UEV1B_ARATH	8.63e-44
TRINITY_DN1057_c0_g1_i6.p1	5.36	8	7.88	3.73	2.44	3.64	9.82	7.02	10.33	4.27	7.2	4.84	5.32	9.95	9.76	8.93	7.13	7.14	8	8.53	10.13
TRINITY_DN10582_c0_g1_i1.p1	0	3.3	1.05	3.53	1.52	0	0.95	0	1.37	1.58	2.41	1.7	1.86	1.3	0.83	1.02	1.91	4.25	0.77	2.09	5.12	AT2G34630.1	3.33e-53	Solanesyl diphosphate synthase 3, chloroplastic/mitochondrial [Source:UniProtKB/Swiss-Prot;Acc:Q5HZ00]	SPS1_ORYSJ	5.16e-51
TRINITY_DN10582_c0_g1_i15.p1	14.86	10.54	10.46	10.27	9.41	12.27	12.06	11.37	9.01	12.15	10.81	10.66	12.43	10.94	11.72	15.06	13.81	14.36	16.05	13.24	14.53	AT2G34630.1	9.48e-120	Solanesyl diphosphate synthase 3, chloroplastic/mitochondrial [Source:UniProtKB/Swiss-Prot;Acc:Q5HZ00]	SPS1_ORYSJ	1.11e-118
TRINITY_DN10582_c0_g1_i2.p2	11.14	5.62	5.2	6.93	6.56	6.54	12.75	9.81	16.98	12.14	9.01	13.16	9.09	12.92	14.66	13.94	16.13	17.86	12.33	15.44	12.59	AT2G34630.2	1.36e-37	Solanesyl diphosphate synthase 3, chloroplastic/mitochondrial [Source:UniProtKB/Swiss-Prot;Acc:Q5HZ00]	SPS1_ORYSJ	3.16e-40
TRINITY_DN10582_c0_g1_i4.p1	33.71	21.07	26.08	35.78	32.53	24.89	31.87	30.14	26.54	35.57	30.44	32.2	24.36	37.79	47.32	39.75	32.33	42.41	50.54	61.78	57.02	AT2G34630.2	2.43e-56	Solanesyl diphosphate synthase 3, chloroplastic/mitochondrial [Source:UniProtKB/Swiss-Prot;Acc:Q5HZ00]	SPS1_ORYSJ	7.42e-58
TRINITY_DN10582_c0_g1_i5.p1	13.25	16.45	11.84	11.34	14.61	13.39	16.67	16.85	15.22	15.29	15.54	21.64	20.67	18.73	22.73	15.28	21.78	28.77	26.39	23.21	13.99	AT2G34630.2	8.08e-118	Solanesyl diphosphate synthase 3, chloroplastic/mitochondrial [Source:UniProtKB/Swiss-Prot;Acc:Q5HZ00]	SPS1_ORYSJ	1.08e-120
TRINITY_DN10583_c0_g1_i1.p1	25.38	23.84	20.76	15.86	29.67	27.26	20.48	44.95	36.55	37.84	43.91	49.65	50.2	47.08	55.09	48.49	50.39	56.09	54.04	38.5	38.65	AT4G18900.1	5.42e-83		YBEG_SCHPO	1.74e-34
TRINITY_DN10583_c0_g1_i5.p1	17.88	17.37	15.42	11.33	15.36	15.97	12.01	19.65	17.06	26.57	24.06	24.11	21.66	24.69	27.71	25.45	30.41	25.17	39.66	25.17	25.35	AT4G18905.1	1.74e-134		YBEG_SCHPO	2.01e-65
TRINITY_DN105845_c0_g1_i1.p1	0	0	0	0.27	0	0	0	0	0.51	0	0	0.21	0	0	0	0	0	0	0	0	0.2
TRINITY_DN10584_c0_g1_i1.p1	5.51	8.21	11.79	5.97	9.21	8.03	6.87	7.01	10.29	10.59	11.35	13.03	10.58	7.58	7.57	13.03	10.03	13.02	12.28	5.86	4.53	AT4G04220.1	0		RLP46_ARATH	0
TRINITY_DN10587_c0_g1_i2.p1	28.68	9.13	17.8	18.1	27.42	40.3	41.68	20.58	15.97	18.85	16.2	33.96	20.73	32.53	29.04	17.1	30.98	30.12	59.05	79.47	66.06	AT1G11380.1	1.28e-78		PCR8_ARATH	7.59e-10
TRINITY_DN10587_c0_g2_i1.p1	198.24	182.75	184.83	148.54	176.55	148.5	159.82	239.67	198.25	228.41	279.35	218.18	219.8	221	283.42	286.74	311.4	244.26	264.87	286.7	345.85	AT3G16780.1	3.98e-110	60S ribosomal protein L19-2 [Source:UniProtKB/Swiss-Prot;Acc:Q9LUQ6]	RL192_ARATH	3.92e-109
TRINITY_DN105880_c1_g5_i1.p1	0	0	0.24	0	0	0.28	0.28	0	0.59	0	0.59	0	0	0	0	0	0	0	0	0	0
TRINITY_DN105880_c1_g5_i1.p2	0.52	0	0	0	0	0.56	0	0.49	0	0	0.59	0	0	0	0	0	0	0	0	0	0
TRINITY_DN105880_c1_g5_i1.p3	0	0	0	0	0	0	0	0	0	0	0	0	0	0	0	0	0	0	0.48	0	0
TRINITY_DN105898_c0_g1_i1.p1	0	0	0	0	0	0	0	0	0.69	0	0	0	0	0	0	0	0	0	0	0	0.52	AT4G23160.2	6.71e-33		POLR1_ARATH	9.72e-35
TRINITY_DN1058_c0_g1_i11.p1	1.16	1.2	1.18	1.4	1.81	2.12	2.85	3.12	3.06	1.3	1.73	3.06	4.95	3.05	5.94	4.33	4.18	4.07	8.38	3.56	5	AT1G34300.1	4.98e-117	G-type lectin S-receptor-like serine/threonine-protein kinase At1g34300 [Source:UniProtKB/Swiss-Prot;Acc:Q9XID3]	KPRO_MAIZE	0
TRINITY_DN1058_c1_g1_i1.p1	186.96	188.1	210.33	206.62	200.75	208.07	222.23	236.64	238.97	244.82	212.17	202.32	205.22	221.67	347.44	342.11	311.37	295.4	239.41	316.71	353.65	AT2G34460.1	3.56e-129	Uncharacterized protein At2g34460, chloroplastic [Source:UniProtKB/Swiss-Prot;Acc:Q8H124]	Y2446_ARATH	3.51e-128
TRINITY_DN1058_c2_g1_i1.p1	12.01	12.52	14.93	9.73	21.12	25.08	20.14	17.71	19.11	11.85	12.96	19.25	27.37	17.27	16.92	16.29	15.89	10.8	22.11	20.6	19.53	AT5G57240.2	1.75e-130	Oxysterol-binding protein-related protein 4C [Source:UniProtKB/Swiss-Prot;Acc:Q9LVD4]	ORP4C_ARATH	1.72e-129
TRINITY_DN105900_c0_g1_i1.p1	0	0	0	0	0	0	0	0	0	0.42	0	0	0	0	0	0	0	0	0.24	0	0
TRINITY_DN105903_c0_g1_i1.p1	0	0	0	0	0	0	0	0	0	0.32	0.91	0	0	0	0	0	0	0	0	0	0	AT1G64160.1	2.25e-72	Dirigent protein 5 [Source:UniProtKB/Swiss-Prot;Acc:Q9SH66]	DIR5_ARATH	2.21e-71
TRINITY_DN105929_c0_g1_i1.p1	0.26	0.31	0.23	0	0.17	0.45	0.09	0.32	0.57	0.58	1.18	0.9	0.36	0.53	0.54	0.52	0.69	0.88	1.03	0.76	1.19	AT1G06520.1	0	Glycerol-3-phosphate acyltransferase 1 [Source:UniProtKB/Swiss-Prot;Acc:Q9SHJ5]	GPAT1_ARATH	0
TRINITY_DN105931_c0_g1_i1.p1	0	0	0	0	0.71	0.4	0	0	0	0	0	0.38	0.54	0	0.58	0.39	0.74	0	1.12	0	0.43	AT3G51620.1	3.68e-06
TRINITY_DN105935_c0_g1_i1.p1	0	0	0	0	0	0	0	0	0	0.21	0	0	0	0.23	0	0	0	0	0	0	0
TRINITY_DN10593_c0_g1_i2.p1	38.89	43.84	37.45	30.83	33.81	39.49	42.7	53.23	55.18	48.75	49.37	53.33	54.04	59.03	62.29	60.25	62.57	52.3	70.02	58.86	56.17	AT1G73840.1	1.39e-19
TRINITY_DN105947_c0_g1_i1.p1	0	0	0	0	0	0	0	0	0	0	0.67	0	0	1.04	0	0	0	0	0	0	0				LIN1_LOTJA	4.42e-20
TRINITY_DN10597_c0_g1_i2.p1	0.65	1.71	1.92	0.86	2.31	1.13	0.84	2.71	3.09	2.65	3.64	4.4	1.7	2.61	23.37	6.2	10.35	8.85	30	16.37	14.66	AT5G24910.1	1.3e-151	Cytochrome P450 714A1 [Source:UniProtKB/Swiss-Prot;Acc:Q93Z79]	C14C2_ORYSJ	2.15e-168
TRINITY_DN105984_c0_g1_i2.p1	0	0	0	0	0	0	0	0	0	0	0	0	0	0	0	0	0	0	0	0.38	0	AT2G37650.1	7.58e-32	Scarecrow-like protein 9 [Source:UniProtKB/Swiss-Prot;Acc:O80933]	SCL9_ARATH	7.46e-31
TRINITY_DN10598_c0_g1_i3.p1	0.89	1.07	0.51	0.35	0.86	1.24	0.31	0.28	0.32	0.47	0.64	0.27	0	0.26	0	0.6	1.17	1.34	0.54	0.86	0.26	ATMG00710.1	2.75e-08	Uncharacterized mitochondrial protein AtMg00710 [Source:UniProtKB/Swiss-Prot;Acc:P92512]	POLX_TOBAC	8.46e-23
TRINITY_DN10598_c0_g1_i4.p1	0.39	0	0	0	0	0.41	0.41	0.36	0	0.31	0	0	1.24	0.69	0	0	0	1.05	0.35	0	0.33	AT4G23160.2	5.05e-45		POLR2_ARATH	1.21e-27
TRINITY_DN10598_c0_g1_i7.p1	0.14	1.14	0.62	0.33	0.27	0.15	0.29	1.05	0.46	0	0.45	0.26	0.29	0.86	0.14	0.28	0.84	0.39	0.39	0	0.13	AT4G23160.2	7.08e-91		POLR1_ARATH	3.35e-67
TRINITY_DN10598_c3_g1_i2.p1	0	0.97	1.78	1.88	0	1.68	1.11	2.44	0	0.81	0	2.73	2.83	0	5.11	0.54	0	0	4.71	0.5	0.44
TRINITY_DN105993_c0_g1_i1.p1	0	0	0	0	0	0	0.71	0	0	0	0	0	0	0	0	0	0	0	0	0	0	AT1G30820.1	8.76e-66		PYRG_DICDI	1.42e-54
TRINITY_DN10599_c0_g1_i2.p1	73.5	70.94	99.65	80.02	94.35	118.76	122.59	107.24	102.19	99.33	93.01	121.87	134.55	163.69	102.32	108.41	151.3	139.97	183.45	175.07	189.82
TRINITY_DN1059_c0_g1_i1.p1	1.24	0.56	0.27	2.2	1.8	1.3	1.61	1.73	3.05	1.98	1.35	2.8	0.65	0.54	1.24	0.31	1.53	1.13	0.28	0.9	1.35
TRINITY_DN1059_c0_g1_i11.p1	30.32	35.61	24.05	19.67	29.67	39.35	37.82	49.59	53.01	36.44	31.94	51.91	64.92	56.31	77.58	51.15	60.94	50.91	117.04	79.14	87.96	AT1G59710.1	6.78e-97
TRINITY_DN1059_c0_g2_i1.p1	12.77	14.07	15.63	9.1	11.11	12.98	11.09	10.35	14.64	12.42	12.03	11.44	15.72	9.95	17.15	15.66	22.21	22.2	28.48	30.12	22.08	AT5G35080.1	4.15e-98	Protein OS-9 homolog [Source:UniProtKB/Swiss-Prot;Acc:Q8GWH3]	OS9_ARATH	4.08e-97
TRINITY_DN1059_c0_g2_i2.p1	0	0.87	1.5	0.82	0.77	2.8	1.87	3.36	5.6	1.7	3.9	5.49	4.62	4.51	4.25	3.43	4.16	6.61	10.53	1.58	5.05	AT5G35080.1	1.24e-96	Protein OS-9 homolog [Source:UniProtKB/Swiss-Prot;Acc:Q8GWH3]	OS9_ARATH	1.22e-95
TRINITY_DN105_c0_g1_i16.p1	87.29	85.69	117.12	115.91	102.4	105.81	115.4	84.34	77.81	91.6	95.6	81.61	98.63	86.44	89.15	88.81	83.69	81.11	95.36	109.73	119.33	AT4G32930.1	1.7e-73		CZIB_XENLA	6.03e-35
TRINITY_DN105_c0_g1_i6.p1	58.36	60.43	84.56	62	80.32	128.45	91.48	80.9	153.29	50.49	47.39	120.39	57.59	90.61	246.18	214.61	270.87	394.09	544.49	292.46	282.52	AT4G32940.1	5.9e-148	Vacuolar-processing enzyme gamma-isozyme [Source:UniProtKB/Swiss-Prot;Acc:Q39119]	VPE1_PHAVU	9.43e-160
TRINITY_DN105_c1_g1_i4.p1	10.68	4.99	5.43	3.94	2.89	5.77	9.55	8.53	5.84	4.4	3.4	4.9	9.12	8.95	27.2	10.31	8.88	8	10.92	12.26	9.22	AT3G59140.1	5.67e-87	ABC transporter C family member 10 [Source:UniProtKB/Swiss-Prot;Acc:Q9LYS2]	AB10C_ARATH	5.58e-86
TRINITY_DN105_c2_g1_i1.p1	4.3	3.64	4.98	3.11	3.09	3.03	4.26	3.23	5.05	2.77	4.04	5.67	4.76	4.13	5.69	4.6	6.25	7.41	6.88	4.15	2.7	AT4G35560.1	2.61e-139
TRINITY_DN10600_c0_g1_i11.p1	5.08	13.95	20.75	15.69	23.35	18.47	10.64	17.23	29.95	28.2	23.65	21.51	15.18	17.72	36.31	46.23	26.51	27.83	24.04	32.29	26.33	AT1G52510.1	1.83e-34
TRINITY_DN10600_c0_g1_i4.p1	106.86	123.06	108.92	102.52	113.79	117.89	129.54	151.02	126.52	148.96	148.24	141.99	165.08	143.34	118.49	114.97	115.1	120.27	86.8	86.39	78.16	AT1G52510.1	0		OLEB_XANCP	5.69e-18
TRINITY_DN106020_c0_g1_i1.p2	0	0	0	0	0	0	0	0	0	0	0	0	0	0	0	0	0	0	0	0	0	AT2G33620.3	7.06e-26	AT-hook motif nuclear-localized protein 10 [Source:UniProtKB/Swiss-Prot;Acc:O22812]	AHL10_ARATH	6.95e-25
TRINITY_DN106024_c0_g1_i1.p1	0.43	0.38	0.37	0	1.24	0	0	0	0	0.86	2.96	0.39	1.78	0	0.43	0.86	0.21	0.78	0.97	0.21	0
TRINITY_DN10603_c1_g1_i1.p1	28.43	29.78	36.07	29.63	27.72	32.04	27.26	30.11	26.17	35.52	41.78	38.65	31.18	28.07	17.81	16.68	22.41	21.2	18.88	19.47	13.68	AT5G55280.1	0	Cell division protein FtsZ homolog 1, chloroplastic [Source:UniProtKB/Swiss-Prot;Acc:Q42545]	FTSZ1_ARATH	0
TRINITY_DN10603_c2_g1_i1.p1	14.36	11.47	7.74	11.67	13.76	14.57	13.18	12.46	10.15	12.19	20.92	16.43	16.98	12.12	8.98	7.53	8.87	15.36	10.29	12.52	7.04	AT5G42650.1	0	Allene oxide synthase, chloroplastic [Source:UniProtKB/Swiss-Prot;Acc:Q96242]	AOS1_SOLLC	0
TRINITY_DN10603_c2_g2_i1.p1	3.31	5.17	1.56	4.98	2.91	5.04	1.25	1.4	1.64	5.6	4.89	4.36	2.85	0.79	2.41	3.34	6.81	9.01	6	2.46	1.57	AT5G42650.1	2.98e-68	Allene oxide synthase, chloroplastic [Source:UniProtKB/Swiss-Prot;Acc:Q96242]	AOS1_SOLLC	1.36e-95
TRINITY_DN10604_c0_g1_i1.p1	150.21	142.26	153.07	132.39	136.37	131.4	124.08	153.14	129.98	157.36	174.01	141.46	158.65	145.21	184.31	169.2	172.79	163.67	178.26	190.01	176.25	AT3G27240.1	3.53e-159	Cytochrome c1 1, heme protein, mitochondrial [Source:UniProtKB/Swiss-Prot;Acc:Q9LK29]	CY12_SOLTU	7.58e-164
TRINITY_DN10604_c0_g1_i6.p1	1.28	0.53	0.27	0.37	0.3	0.32	0	1.16	0.68	0	0.66	0	1.9	1.92	1.92	0.91	0.92	0.86	0.83	1.5	0	AT5G40810.1	1.8e-19	Cytochrome c1 2, heme protein, mitochondrial [Source:UniProtKB/Swiss-Prot;Acc:Q9FKS5]	CYC1B_ARATH	1.77e-18
TRINITY_DN10604_c0_g2_i1.p1	14.76	14.87	11.65	15.57	20.31	22.21	19.23	15.75	18.31	15.29	12.98	20.67	21.21	16.99	18.24	19.59	14.71	17.42	31.13	22.21	26.62	AT2G20410.1	2.06e-102		TRIP4_MOUSE	1.72e-34
TRINITY_DN10606_c0_g1_i1.p1	19.43	16.24	17.46	11.31	18.98	17.89	17.52	22.55	24.12	19.59	14.9	19.52	25.27	26.91	36.89	28.94	29.38	30.27	41.17	31.68	32.13	AT3G43230.1	0		YIE2_SCHPO	1.58e-44
TRINITY_DN10607_c0_g1_i2.p1	20.79	23.02	23.93	23.61	28.58	36.93	36.43	44.54	47.26	23.2	18.64	26.96	38.66	36.79	63.36	52.38	47.45	35.39	54.72	39.96	61.12	AT5G13200.1	2.68e-115	GEM-like protein 5 [Source:UniProtKB/Swiss-Prot;Acc:Q9LYV6]	GEML5_ARATH	2.64e-114
TRINITY_DN10608_c0_g1_i1.p1	20.74	16.91	20.75	20.73	19.04	11.76	10.08	14.5	21.51	20.23	28.16	22.56	9.47	11.43	2.58	7.17	6.93	10.06	5.71	3.94	1.28	AT5G49040.1	1.18e-63	Dirigent protein 3 [Source:UniProtKB/Swiss-Prot;Acc:Q9FI66]	DIR3_ARATH	1.16e-62
TRINITY_DN10609_c0_g1_i1.p1	1.9	2.65	4.09	1.72	0.93	1.53	1.51	4.02	3.15	3.35	4.83	0.42	4.12	5.09	9.41	5.89	7.04	5.59	5.18	4.6	2.82	AT3G55410.1	2.22e-90		ODO1_DICDI	5.86e-27
TRINITY_DN1060_c0_g1_i1.p1	26.34	25.33	26.21	18.06	24.55	33.87	27.15	30.08	33	22.01	19.1	26.97	27.26	36.72	59.14	44.06	42.79	40.05	51.9	67.1	74.32	AT3G47850.1	9.1e-29
TRINITY_DN10610_c0_g1_i1.p1	2.13	2.49	2.04	1.55	2.25	1.75	1.57	2.02	2.02	1.85	2.26	2.43	2.32	2	1.6	2.33	2.72	2.53	3.28	1.79	1.43	AT2G13680.1	0	Callose synthase 5 [Source:UniProtKB/Swiss-Prot;Acc:Q3B724]	CALS5_ARATH	0
TRINITY_DN10611_c1_g1_i1.p1	21.29	23.07	17.46	14.09	18.64	19.08	17.68	25.3	29.91	22.45	18.86	23.63	24	31.52	34.01	22.32	29.65	25.41	41.29	40.95	34.99	AT1G78650.1	2.69e-115		DPOD3_CHICK	8.4e-15
TRINITY_DN10612_c0_g1_i12.p1	12.48	7.71	8.98	10.72	11.54	8.12	7.51	14.91	14.44	13.75	10.05	9.46	13.86	11.33	18.51	18.29	17.9	20.53	21.68	28.15	27.34	AT5G23710.1	5.05e-57		RPC6_BOVIN	2.54e-22
TRINITY_DN106131_c0_g1_i1.p1	0	0	0	0	0	0	0	0	0	0	0	0	0	0	0	0	0	0	0	0	0	AT1G17200.1	6.14e-41	CASP-like protein 2A1 [Source:UniProtKB/Swiss-Prot;Acc:Q8VZQ3]	CSPLA_ORYSJ	2.46e-89
TRINITY_DN106139_c1_g1_i1.p1	0	0	0	0	0	0	0	0	0	0	0	0	0	0	0	0	0	0	0	0	0				COPIA_DROME	4.57e-10
TRINITY_DN106144_c0_g1_i1.p1	0	0	0	0	0	0.32	0	0	0	0	0	0	0	0	0	0	0	0	0	0	0.26	AT3G53230.1	1.13e-145	Cell division control protein 48 homolog D [Source:UniProtKB/Swiss-Prot;Acc:Q9SCN8]	CDC48_SOYBN	8.91e-146
TRINITY_DN10614_c0_g1_i10.p1	1.62	0.78	1.17	0.9	1.55	2.37	1.47	1.33	1.8	2.23	1.77	1.91	2.43	2.22	1.49	1.79	1.64	1.95	3.68	1.71	1.23	AT3G63460.1	0	Protein transport protein SEC31 homolog B [Source:UniProtKB/Swiss-Prot;Acc:Q8L611]	SC31B_ARATH	0
TRINITY_DN10614_c0_g1_i6.p1	0	1.12	0	0	0.4	0	0.43	0.38	0	0	0.91	0.36	1.31	0.36	2.03	0.84	0.8	0.74	1.85	1.58	0
TRINITY_DN106160_c0_g1_i1.p1	0.28	1.07	0.33	0.55	0.9	0.48	0.29	0.78	0.61	1.23	0.49	0.44	0.48	0.24	0.48	0.28	1.2	1.11	0.6	0.36	0.42	AT2G26700.1	0	Protein kinase PINOID 2 [Source:UniProtKB/Swiss-Prot;Acc:Q64FQ2]	PID2_ARATH	0
TRINITY_DN106167_c0_g1_i1.p1	0	0	0	0	0	0	0	0	0	0	0	0	0	0	0	0	0	0	0	0	0	AT1G49760.1	4.93e-18	Polyadenylate-binding protein 8 [Source:UniProtKB/Swiss-Prot;Acc:Q9FXA2]	PABP8_ARATH	4.85e-17
TRINITY_DN10616_c0_g1_i1.p1	7.68	10.78	10.48	8.49	9.73	10.72	12.39	15.68	13.79	9.56	10.12	10.75	14.48	14.36	25.09	17.29	13.3	16.38	23.39	21.59	21.36	AT1G65430.1	0	Probable E3 ubiquitin-protein ligase ARI8 [Source:UniProtKB/Swiss-Prot;Acc:Q8W468]	ARI8_ARATH	0
TRINITY_DN1061_c1_g1_i5.p1	8.17	7.87	5.37	3.85	11.63	14.5	13.94	13.33	15.33	6.88	6	17.14	18.74	19.04	19.32	21.35	12.13	19.49	24.6	11.92	18.02	AT3G07040.1	2.38e-117	Disease resistance protein RPM1 [Source:UniProtKB/Swiss-Prot;Acc:Q39214]	RPM1_ARATH	2.34e-116
TRINITY_DN106201_c0_g1_i3.p1	0	0	0	0	0	0	0	0	0	0	0	0	0	0	0	0	0	0	0	0	0
TRINITY_DN10620_c0_g1_i1.p1	8.48	9.5	17.4	15.25	10.02	4.25	6.33	8.95	9.91	15.77	28.18	17.59	8.92	8.4	13.38	14.1	15.75	12.01	3.72	8.9	4.12	AT5G47740.1	1.76e-24		PUB36_ARATH	4.3e-10
TRINITY_DN10620_c0_g1_i4.p1	2.13	1.11	4.75	2.47	0	0	2.1	1.05	4.14	0.89	3.68	0.56	0.53	1.41	0.59	0	2.35	1.07	0.44	0.48	0.5	AT5G47740.2	4.8e-07
TRINITY_DN10621_c0_g1_i4.p1	3.06	2.79	2.22	1.01	2.81	2.65	3.02	4.51	2.76	2.51	2.76	2.46	3.42	4.68	2.28	1.9	2.33	1.54	2.94	1.45	2.31	AT3G53760.1	0	Gamma-tubulin complex component 4 [Source:UniProtKB/Swiss-Prot;Acc:Q9M350]	GACP4_ARATH	0
TRINITY_DN10622_c0_g1_i1.p1	1.23	1.24	3.78	2.49	1.89	1.31	0.93	0.84	2.39	3.44	3.48	1.38	0.62	1	1.13	2.78	3.8	2.58	2.34	2.2	2.56	AT3G22220.3	0
TRINITY_DN106230_c1_g2_i1.p1	0	0.41	0	0	0	0	0	0	0	0	0	0	0	0	0	0	0	0	0	0	0
TRINITY_DN10623_c0_g3_i2.p1	3.67	4.75	3.57	3.51	3.87	4.19	3.33	4.87	6.73	4.8	5.4	5.05	4.11	4.71	6.33	6.95	7.2	6.18	7.97	7.18	7.59	AT4G04320.2	0		DCMC_HUMAN	1.56e-91
TRINITY_DN106253_c0_g1_i1.p1	0	0	0	0	0	0	0	0	0	0	0	0.41	0	0	0	0	0.45	0	0	0	0	AT2G23460.1	1.17e-57	Extra-large guanine nucleotide-binding protein 1 [Source:UniProtKB/Swiss-Prot;Acc:O80462]	XLG1_ARATH	1.15e-56
TRINITY_DN1062_c0_g1_i2.p1	3.45	4.83	5.34	3.18	6.07	7.49	4.82	12.92	10.87	8.52	7.81	10.9	11.49	8.65	32.51	24.05	24.53	23.9	32.9	34.42	34.61	AT3G56460.1	1.04e-149		QORL2_RAT	5.36e-43
TRINITY_DN106309_c0_g1_i1.p1	0	0	0	0	0	0	0	0	0	0	0	0	0	0	0	0	0	0	0	0	0	AT3G15730.1	2.09e-99	Phospholipase D alpha 1 [Source:UniProtKB/Swiss-Prot;Acc:Q38882]	PLDA1_ORYSJ	3.5e-113
TRINITY_DN106374_c0_g1_i1.p1	0	0	0.35	0	0	0	0	0.76	0	0	0.45	0	0	0	0	0	0	0	0	0	0	ATMG00810.1	9.06e-47	Uncharacterized mitochondrial protein AtMg00810 [Source:UniProtKB/Swiss-Prot;Acc:P92519]	POLR2_ARATH	5.28e-55
TRINITY_DN10638_c0_g4_i1.p1	1.93	0.61	0.55	2.36	1.26	1.42	2.09	2.44	2.14	2.47	3.01	1.66	2.15	1.75	1.26	1.35	0.63	2.9	0.58	1.87	2.13	AT3G46530.1	5.41e-08	Disease resistance protein RPP13 [Source:UniProtKB/Swiss-Prot;Acc:Q9M667]	R1A4_SOLDE	8.79e-09
TRINITY_DN1063_c0_g1_i1.p1	16.74	18.36	13	9.94	10.41	13.14	16.3	15.44	19.56	17.94	11.93	22.52	15.39	16.16	29	31.76	28.11	25.98	33.02	29.9	32.74	AT4G20330.1	3.74e-116		T2EB_SCHPO	1.93e-12
TRINITY_DN1063_c0_g1_i6.p1	0	0.48	1.32	0.62	0.5	0	0.55	1.93	1.7	2.39	0	1.8	0.56	0.92	2.53	1.59	1.52	0.92	0	1.49	0.86	AT4G20330.1	8.9e-42
TRINITY_DN106412_c0_g1_i1.p1	0	0	0	0	0	0	0	0	0	0	0	0	0	0	0	0	0	0.46	0.93	0	0				OPPA_BACSU	3.58e-06
TRINITY_DN10641_c0_g1_i1.p1	1.28	1.57	0.37	1.02	2.48	0.91	2.24	1.59	0.93	0.67	2.37	2.27	0.91	1.51	1.69	2.18	2.1	1.54	1.54	4.94	2.18	AT1G67120.1	2.02e-17		MDN1_ARATH	1.5e-16
TRINITY_DN10642_c0_g2_i2.p1	2.95	6.25	17.76	22.34	9.93	5.2	3.16	5.09	9.6	17.75	18.23	12.99	5.67	5.47	7.99	13.9	17.19	19.5	16.12	9.89	6.15	AT4G31500.1	1.63e-80	Cytochrome P450 83B1 [Source:UniProtKB/Swiss-Prot;Acc:O65782]	C71Z3_PASSA	7.73e-80
TRINITY_DN106433_c2_g1_i1.p1	0	0.42	0.39	0	0	0	0	0	0	0	0	0	0	0	0	0	0	0	0.82	0	0	AT1G78940.3	4.1e-17
TRINITY_DN10643_c0_g1_i11.p1	4.88	1.81	3.86	1.91	2.55	2.31	3.33	3.37	6.62	3.45	1.51	4.1	5.27	3.87	5.73	3.25	4.79	4.8	7.74	6.68	7.19	AT4G14720.1	1.95e-46	Protein TIFY 4B [Source:UniProtKB/Swiss-Prot;Acc:Q8GY55]	TIF4B_ARATH	1.92e-45
TRINITY_DN10644_c1_g1_i1.p1	7.19	2.15	1.45	2.26	10.41	11.2	7.16	7.09	5.48	10.98	2.56	7	11.75	8.55	16.05	6.49	9.43	8.05	37.16	21.55	17.02	AT1G06410.3	1.59e-121	Probable alpha,alpha-trehalose-phosphate synthase [UDP-forming] 7 [Source:UniProtKB/Swiss-Prot;Acc:Q9LMI0]	TPS7_ARATH	1.57e-120
TRINITY_DN10644_c1_g3_i1.p1	4.45	4.1	4.38	1.91	18.5	21.86	15.52	12.23	6.58	13.71	4.92	13.71	23.17	14.43	26.26	8.02	11.57	11.59	45.26	30.14	22.99	AT1G06410.3	1.08e-116	Probable alpha,alpha-trehalose-phosphate synthase [UDP-forming] 7 [Source:UniProtKB/Swiss-Prot;Acc:Q9LMI0]	TPS7_ARATH	1.06e-115
TRINITY_DN10644_c5_g1_i1.p1	3.05	1.1	0.63	0	2.73	13.16	4.28	0.67	0.87	2.54	0	3.01	10.38	6.37	10.89	5.2	7.87	4.96	20.97	8.74	7.44	AT1G06410.3	2.59e-92	Probable alpha,alpha-trehalose-phosphate synthase [UDP-forming] 7 [Source:UniProtKB/Swiss-Prot;Acc:Q9LMI0]	TPS7_ARATH	2.55e-91
TRINITY_DN106451_c0_g1_i1.p1	0.58	0	0	0	0	0	0.3	0	0	0	0	0	0	0	0	0	0	0	0	0	0	AT4G23160.2	2.57e-49		POLR1_ARATH	2.58e-74
TRINITY_DN10645_c0_g1_i2.p2	9.24	8.71	11.47	8.88	8.48	8.64	5.75	12.56	9.84	9.73	9.95	11.68	9.86	8.1	10.26	15.66	11.56	18.82	19.3	15.34	15.12	AT2G22010.1	3.85e-25	E3 ubiquitin-protein ligase RKP [Source:UniProtKB/Swiss-Prot;Acc:Q9SIZ8]	RKP_ARATH	3.78e-24
TRINITY_DN10645_c0_g1_i6.p1	4.86	5.59	5.06	2.57	5.33	4.78	4.33	5.26	6.29	6.8	6.11	5.14	7.03	6.27	11.19	9	11.88	10.8	19.58	8.98	7.67	AT2G22010.1	0	E3 ubiquitin-protein ligase RKP [Source:UniProtKB/Swiss-Prot;Acc:Q9SIZ8]	RKP_ARATH	0
TRINITY_DN10647_c0_g3_i2.p1	65.34	69.4	69.31	50.42	67.98	72.97	59.26	77.54	81.41	69.48	67.61	71.22	79.95	83.18	131.47	107.2	111.02	109.15	122.83	104.44	115.11	AT1G16180.1	0		SERIC_NEMVE	5.01e-39
TRINITY_DN10648_c1_g1_i3.p1	13.35	18.04	11.04	12.79	16.92	19.44	15.81	25.75	26.36	16.68	14.99	22.45	24.78	18.93	25.06	32.77	31.72	31.78	32.26	28.22	23.08	AT3G62140.1	1.9e-62		PIP30_MOUSE	7.2e-06
TRINITY_DN10648_c4_g2_i1.p1	14.94	14.99	16.26	16.06	16.69	17.48	13.28	14.24	13.98	16.92	13.07	15.82	14.29	14.21	16.98	13.52	18.33	16.32	11.31	18.87	17.94	AT1G56345.1	9.38e-100	RNA pseudouridine synthase 1 [Source:UniProtKB/Swiss-Prot;Acc:Q7XA65]	PUS1_ARATH	9.23e-99
TRINITY_DN1064_c1_g1_i2.p1	48.16	52.87	50.44	34.39	42.34	40.32	38.14	59.96	54.43	51.27	48.87	52.99	54.69	50.46	78.92	59.79	66	63.55	68.19	56.33	54.6	AT5G40760.1	0	Glucose-6-phosphate 1-dehydrogenase, cytoplasmic isoform 2 [Source:UniProtKB/Swiss-Prot;Acc:Q9FJI5]	G6PD_SOLTU	0
TRINITY_DN1064_c1_g1_i6.p1	12.34	4.65	15.16	12.7	13.56	5.68	11.91	3.6	7.86	14.44	7.65	22.68	3.14	7.07	16.37	13.88	11.34	15.32	3.21	10.55	7.23	AT5G40760.1	3.66e-104	Glucose-6-phosphate 1-dehydrogenase, cytoplasmic isoform 2 [Source:UniProtKB/Swiss-Prot;Acc:Q9FJI5]	G6PD_SOLTU	4.82e-108
TRINITY_DN10650_c0_g2_i4.p1	3.79	3.34	7.03	3.74	4.32	10.53	2.81	2.8	4.56	11.26	10.1	8.58	6.36	2.32	0.93	1.54	4.9	4.78	1	3.03	0.98	AT3G11480.1	2.13e-79	Salicylate/benzoate carboxyl methyltransferase [Source:UniProtKB/Swiss-Prot;Acc:Q6XMI3]	BSMT1_PETHY	1.03e-105
TRINITY_DN10650_c0_g2_i5.p1	0	0.77	0	0.3	1.35	0.71	1.27	1.34	0.53	0.57	0.83	0.64	2.78	0.19	0	0.4	0	0.49	0	0	0	AT3G11480.1	1.98e-70	Salicylate/benzoate carboxyl methyltransferase [Source:UniProtKB/Swiss-Prot;Acc:Q6XMI3]	BSMT1_PETHY	1.3e-96
TRINITY_DN10650_c0_g3_i1.p1	1.8	1.91	1.8	1.75	2.36	2.21	2.2	3.37	3.26	1.31	1.86	2.73	4.81	3.88	3.74	2.05	2.04	2.84	3.17	2.56	2.3	AT4G24480.1	8.62e-110		CTR1_ARATH	6.14e-51
TRINITY_DN10651_c0_g1_i2.p1	40.46	37.92	44.32	34.94	41.17	31.36	34.46	39.22	53.39	33.51	43.32	38.22	35.29	38.42	44.73	45.66	44.87	42.53	45.31	46.12	50.66	AT4G14420.1	1.63e-44
TRINITY_DN106525_c0_g1_i1.p1	0	0	0	0	0	0	0	0	0	0	0	0	0	0	0	0	0	0	0	0	0				POLX_TOBAC	2.6e-22
TRINITY_DN10653_c0_g3_i1.p1	15.18	6.59	11.41	10.04	14.88	12.52	13.69	15.59	19.69	13.12	11.83	17.48	15.46	16.07	18.58	16.64	17.5	13.68	27.01	29.99	46.68	AT5G58375.1	1.15e-17
TRINITY_DN106543_c0_g1_i1.p1	0.43	0	0	0	0	0	0	0	0	0	0	0	0	0	0	0	0	0	0	0	0				YI31B_YEAST	2.29e-42
TRINITY_DN106543_c4_g1_i1.p1	0	0	0	0	0	0	0	0	0	0	0	0	0	0	0	0	0	0	0	0	0				YI31B_YEAST	4.74e-39
TRINITY_DN10654_c0_g3_i4.p1	1.19	0.56	1.53	2.17	0	0.65	1.92	2.25	1.32	0.46	0	3.62	0.66	1.61	1.75	2.49	0.59	1.07	0.54	0.58	0	AT1G13120.1	2.77e-25	Protein GLE1 [Source:UniProtKB/Swiss-Prot;Acc:Q0WPZ7]	GLE1_ARATH	2.72e-24
TRINITY_DN106563_c0_g2_i1.p1	0	0	0.72	0	0	0	0	0.39	0	0	0	0	0.45	0	0	0	0	0.38	0	0	0
TRINITY_DN106579_c0_g1_i1.p1	0.28	0	0.12	0	0.27	0.56	0.14	0.13	0	0.11	0	0	0.42	0.24	0	0	0	0	0	0	0.12	AT4G23160.2	7.68e-40		POLR1_ARATH	1.36e-56
TRINITY_DN106579_c1_g1_i1.p1	0.29	0	0	0	0	0	0.3	0	0	0	0	0	0	0	0.29	0.59	0	0	0	0	0	AT4G23160.2	2.06e-55		POLR1_ARATH	6.67e-74
TRINITY_DN106579_c2_g1_i1.p1	0	0.59	0	0	0	0	0	0	0	0	0	0	0	0	0	0	0	0	0	0	0
TRINITY_DN10659_c0_g1_i14.p1	154.6	112.68	63.32	24.61	14.73	43.64	102.37	126.87	144.19	27.79	35.91	31.65	66.94	131.03	167.04	316.23	88.68	31.66	13.67	61.33	108.83	AT5G02230.2	2.48e-134		YAI5_SCHPO	6.23e-18
TRINITY_DN10659_c0_g1_i15.p1	5.41	4.11	2.13	1.07	0	0.55	1.42	2.13	1.52	0.38	1.53	0	1.01	1.21	1.36	3.26	1.33	0	0	0.43	1.59	AT5G59480.1	5.69e-44
TRINITY_DN10659_c0_g4_i1.p1	5.57	7.57	3.98	0.38	0.83	3.3	6.76	4.64	4.01	4.74	2.13	1.18	2.62	2.97	4.06	16.36	4.65	0	0	4.24	3.15	AT5G02230.2	1.02e-60		YAI5_SCHPO	1.36e-07
TRINITY_DN1065_c0_g1_i13.p1	39.03	33.49	33.47	26.23	33.6	29.96	31.45	42.46	45.62	38.87	43.85	44.68	37.45	35.39	48.21	51.94	41.85	46.12	46.07	45.53	48.57	AT4G22720.2	0		OSGEP_RAT	1.45e-179
TRINITY_DN1065_c0_g2_i1.p1	19.65	16.48	17.15	11.48	13.53	11.74	10.36	15.73	20.23	31.21	32.98	24.55	20.07	16.35	32.56	24.69	26.85	29.38	37.79	29.66	34.27	AT3G18600.1	0	DEAD-box ATP-dependent RNA helicase 51 [Source:UniProtKB/Swiss-Prot;Acc:Q9LIH9]	RH27_ORYSJ	0
TRINITY_DN1065_c0_g3_i1.p1	17.86	13.23	7.87	7.23	13.48	12.99	13.54	17.92	15.63	12.07	13.99	11.6	18.18	13.23	6.26	7.77	8.65	11.11	10.79	6.91	5.72	AT5G66310.2	0	Kinesin-like protein KIN-7H [Source:UniProtKB/Swiss-Prot;Acc:F4JZ68]	KN7H_ARATH	0
TRINITY_DN1065_c1_g1_i4.p1	27.45	39.15	24.53	16.93	32.92	39.28	30.24	54.02	52.45	30.37	26.31	39.61	40.43	45.76	64.47	56.64	42.05	46.76	37.58	59.97	65.45	AT3G22810.1	2.71e-163		VAB_ARATH	1.46e-112
TRINITY_DN1065_c1_g2_i3.p1	0.37	0	3.48	8.74	4.27	4.27	3.07	0.68	3.22	7.56	4.04	3.29	6.64	2.27	16.08	0.75	1.81	1	11.98	0.71	1.58
TRINITY_DN1065_c6_g1_i1.p1	1.15	0.78	0	0	0.28	0	0	2.67	0.94	0.92	0.93	0	0.3	0	0.58	0.87	0.28	1.04	1.83	0.28	0	AT4G29090.1	1.21e-28		RNHX1_ARATH	2.2e-09
TRINITY_DN1065_c6_g1_i1.p2	0	0.44	0	0	0	1.02	0	0.89	0	0.74	0.54	0	0	0	0	0.98	3.75	0.43	0.43	2.3	0.4	AT2G13980.1	7.75e-10
TRINITY_DN10660_c0_g1_i1.p1	52.9	50	58.33	45.85	51.85	54.71	48.03	55.88	63.52	60.56	67.52	47.79	64	57.04	44.74	31.8	37.36	38.97	48.68	43.82	38	AT2G43710.1	0	Stearoyl-[acyl-carrier-protein] 9-desaturase 7, chloroplastic [Source:UniProtKB/Swiss-Prot;Acc:O22832]	STAD_SOLCO	0
TRINITY_DN10661_c0_g1_i1.p1	8.06	7.48	5.83	6.74	5.02	8.93	6.44	7.7	6.79	6.46	6.98	7.57	8.43	6.12	9.65	6.79	7.16	8.02	16.02	16.08	13.44	AT2G36900.1	5.62e-94	Membrin-11 [Source:UniProtKB/Swiss-Prot;Acc:Q9SJL6]	MEM11_ARATH	5.53e-93
TRINITY_DN106671_c0_g1_i3.p1	0.17	0.15	0.3	0.41	0	0	0	0	0	0.28	0	0.16	0	0.15	0	0	0.17	0	0	0	0	AT4G30860.1	1.73e-134	Histone-lysine N-methyltransferase ASHR3 [Source:UniProtKB/Swiss-Prot;Acc:Q949T8]	ASHR3_ARATH	1.71e-133
TRINITY_DN106676_c0_g1_i1.p1	0.4	0	0	0	0	0	0	0	0	0.62	0	0	0.42	0.35	0	0	0	0	0	0.38	0	AT1G43760.1	5.54e-09		YTX2_XENLA	2.88e-10
TRINITY_DN106694_c0_g1_i1.p1	0	0	0	0	0	0	0	1.08	0	0	0	0	1.25	0	0	0	0	0	0	0	0
TRINITY_DN1066_c0_g1_i10.p1	0.51	0.74	3.4	0.56	0.73	2.17	0.55	2.58	1.3	2.13	1.58	1.72	2.91	2	2.67	2.51	2.91	4.85	5.21	1.93	1.29
TRINITY_DN1066_c0_g1_i7.p1	1.97	0.69	0.79	0.52	1.03	0	2	1.03	2.4	3.53	4.44	4.69	3.49	3.32	6.21	1.17	4.02	2.45	3.91	1.39	1.52
TRINITY_DN1066_c1_g1_i2.p1	11.66	11.19	11.02	8.43	11.49	12.53	11.65	13.02	13.45	12.84	11.24	11.64	13.6	13.29	18.73	12.17	16.21	14.35	22.29	15.17	14.49	AT2G07360.1	0		TSTB_DICDI	2.52e-07
TRINITY_DN1066_c2_g1_i1.p1	1.33	0.95	0.23	0.62	0	0.55	0.27	0.74	0.58	0	0.86	1.93	0.83	1.39	1.06	0.53	2.09	0	0.72	0.51	0.7	AT4G14368.4	3.7e-28		PRAF1_ARATH	1.6e-20
TRINITY_DN1066_c2_g2_i5.p1	0	0	0	0	0.57	0.63	0.62	0	0	0	0	0	0	0	0	1.21	1.71	0	0.53	0.56	0.97	AT3G23270.2	4.05e-21		PRAF1_ARATH	1.1e-17
TRINITY_DN106705_c1_g3_i1.p1	0	1.71	0	0.74	0.59	0	0	0.57	0	0	0	0	0.67	0	0	0	0	0	0	0	0	AT4G23160.2	2.61e-26		POLR1_ARATH	4.06e-43
TRINITY_DN10671_c0_g1_i4.p1	0.9	1.29	1.27	0.92	0.54	1.26	1.26	0.72	2.44	2.03	1.06	1.36	1.15	1.94	0.11	1.56	2.88	1.64	1.64	0.98	1.01	AT3G55350.1	6.14e-97		ALPL_ARATH	6.04e-96
TRINITY_DN10672_c0_g1_i3.p1	79.75	83.16	102.23	85.58	77.44	68	57.68	91.3	98.92	113.99	149.66	93.33	81.13	76.38	33.8	35.15	37.86	43.6	12.66	21.3	26.71	AT5G17220.1	1.21e-85	Glutathione S-transferase F12 [Source:UniProtKB/Swiss-Prot;Acc:Q9FE46]	GSTFC_ARATH	1.19e-84
TRINITY_DN10674_c0_g1_i2.p1	1.59	1.3	2.55	1.97	0.98	1.5	1.26	2.7	2.69	1.38	1.76	2	1.5	2.14	4.47	6.71	5	3.81	3.59	3.5	4.57	AT4G18160.1	1.4e-136	Two-pore potassium channel 3 [Source:UniProtKB/Swiss-Prot;Acc:Q9SVV6]	KCO6_ARATH	1.38e-135
TRINITY_DN106767_c0_g1_i1.p1	0	0	0	0	0	0	0	0	0	0	0	0	0	0	0.37	0	0	0.22	0.33	0	2.65	AT5G58860.1	4.6e-45	Cytochrome P450 86A1 [Source:UniProtKB/Swiss-Prot;Acc:P48422]	HIMC_ASPJA	1.76e-154
TRINITY_DN10677_c0_g1_i1.p1	24.69	22.15	28.57	22.23	24.72	22.9	18.72	20.7	28.11	32.49	28.93	26.69	28	21.2	31.8	34.14	35.43	28.36	41.81	38.85	38.67	AT3G09350.1	0		HPBP1_MOUSE	1.63e-17
TRINITY_DN10677_c1_g1_i12.p1	69.66	78.26	60.33	49.5	84.5	97.17	88.01	107.42	74.25	57.34	57.37	86.07	86.09	90.94	102.33	107.86	75.75	71.86	71.66	111.07	136.89	AT3G63250.2	7.37e-109	Homocysteine S-methyltransferase 2 [Source:UniProtKB/Swiss-Prot;Acc:Q9M1W4]	HMT2_ARATH	5.53e-107
TRINITY_DN10678_c0_g1_i1.p1	16.33	20.54	35.63	17.32	32.88	47.75	31.49	49.52	56.87	27.52	29.68	48.5	60.66	50.91	65.86	57.62	45.08	52.18	73.64	61.85	76.34	AT3G07790.1	0		ESS2_MOUSE	5.54e-41
TRINITY_DN106796_c0_g1_i5.p1	0	0	0	0	0	0	0.58	0	0	0	0	0.94	0.59	0	0	0	0	0	0	0	0
TRINITY_DN106796_c1_g1_i1.p1	0	0	0.69	0	0	0	0	0	0	0	0	0	0	0	0	0	0	0	0	0	0
TRINITY_DN10679_c0_g1_i1.p1	7.62	7.38	8.25	5.88	9.48	10.3	11.13	12.57	12.36	10.02	10.12	11.19	14.15	12.79	26.55	14.99	12.19	14.66	25.43	29.09	32.47	AT4G07400.1	0	Putative F-box/LRR-repeat protein 8 [Source:UniProtKB/Swiss-Prot;Acc:Q9S9X4]	FBL8_ARATH	0
TRINITY_DN1067_c0_g1_i4.p1	1.81	4.56	2.08	6.62	4.14	6.62	2.61	0.57	0.67	8.85	4.21	3.14	6.02	3.28	1.19	0.63	0.6	1.09	0.55	0	0.5	AT5G02560.1	4.03e-51	Probable histone H2A.4 [Source:UniProtKB/Swiss-Prot;Acc:Q9LZ46]	H2A3_MEDTR	7.04e-52
TRINITY_DN1067_c0_g1_i9.p1	3.01	4.75	3.33	3.09	3.76	2.75	1.81	1.21	2.84	3.72	0.96	1.91	1.39	3.05	2.13	0	2.12	0.39	0.78	0.83	1.84	AT5G02560.1	9.01e-60	Probable histone H2A.4 [Source:UniProtKB/Swiss-Prot;Acc:Q9LZ46]	H2A1_MEDTR	1.47e-64
TRINITY_DN10682_c2_g2_i1.p1	19.92	20.03	15.51	9.12	17.09	19.15	17.5	32.45	11.48	17.72	24.7	14.35	26.26	12.42	13.06	11.13	17.23	12.35	16.97	14.46	18.62	AT2G29550.1	2.47e-93	Tubulin beta-7 chain [Source:UniProtKB/Swiss-Prot;Acc:P29515]	TBB1_AVESA	3.02e-93
TRINITY_DN10682_c2_g5_i1.p1	78.13	73.62	38.02	25.52	68.16	95.78	83.04	103.34	60.1	45.73	70.05	51.76	78.76	72.74	67.34	65.19	44.66	48.43	72.42	61.37	70.46	AT1G75780.1	1.25e-121	Tubulin beta-1 chain [Source:UniProtKB/Swiss-Prot;Acc:P12411]	TBB1_ARATH	1.23e-120
TRINITY_DN10682_c4_g1_i1.p1	108.01	105.54	75.29	90.82	97.97	127.32	91.56	92.63	86.99	75.7	114.55	88.73	95.3	69.47	38.92	34.28	43.92	49.37	59.52	66.26	59.81	AT1G75780.1	8.64e-151	Tubulin beta-1 chain [Source:UniProtKB/Swiss-Prot;Acc:P12411]	TBB1_ARATH	8.5e-150
TRINITY_DN10684_c0_g1_i1.p1	3.92	2.05	3.39	1.23	2.44	1.51	1.72	2.53	3.32	3.81	1.43	2.57	1.19	1.91	0.97	1.78	1.25	2.12	1.73	1.54	1.71	AT2G41540.3	0	Glycerol-3-phosphate dehydrogenase [NAD(+)] GPDHC1, cytosolic [Source:UniProtKB/Swiss-Prot;Acc:O22216]	GPDH1_ORYSJ	0
TRINITY_DN106853_c0_g1_i1.p1	1.3	0.4	0	0	0	0	0.92	0	0	0	0	0.39	0	0.39	0.43	0	0	0	0	0	0
TRINITY_DN10685_c0_g1_i1.p1	116.92	126.19	140.87	78.05	120.13	129.63	150.17	142.77	179.48	130.12	146.71	157.09	153.94	166.31	158.88	179.36	181.67	173.92	173.37	166.84	142.74
TRINITY_DN10686_c0_g2_i4.p1	86.14	80.83	74.75	40.71	79.21	74.91	71.17	99.3	88.67	80.54	71.4	83.86	87.38	102.68	119.95	110.85	109.04	117.94	133.86	128.59	125.55	AT4G29810.1	8.72e-176	Mitogen-activated protein kinase kinase 2 [Source:UniProtKB/Swiss-Prot;Acc:Q9S7U9]	M2K2_ARATH	8.58e-175
TRINITY_DN10686_c0_g2_i6.p1	2.13	5.58	3.95	2.57	2.53	9.08	6.53	8.36	12.97	7.75	5.11	9.5	5.19	9.37	16.14	17.23	10.87	9.39	19.16	21.49	36.86	AT4G26070.3	2.22e-87	Mitogen-activated protein kinase kinase 1 [Source:UniProtKB/Swiss-Prot;Acc:Q94A06]	M2K1_ARATH	2.18e-86
TRINITY_DN10688_c0_g1_i2.p1	0	0	0	0	0	0	0	0	0.16	0.24	0	0.14	0	0	0	0	0	0	0	0	0
TRINITY_DN106907_c0_g1_i1.p1	0	0	0	0	0	0	0	0	0	0	0	0	0	0	0	0.71	0	0	0	0	1.21
TRINITY_DN10690_c0_g1_i4.p1	15.2	14.93	22.28	19	19.08	18.53	18.87	20.06	17.58	20.35	24.5	19.15	21.12	17.2	17.44	15	23.01	24.09	21.64	26.35	24.59	AT5G43430.1	6.42e-151	Electron transfer flavoprotein subunit beta, mitochondrial [Source:UniProtKB/Swiss-Prot;Acc:Q9LSW8]	ETFB_ARATH	6.32e-150
TRINITY_DN106930_c0_g1_i1.p1	0	0	0	0	0	0	0	0.59	0	0	0	0.54	0	0	0	0	0	0	0	0	0
TRINITY_DN10693_c0_g1_i2.p1	10.52	11.57	15.62	13.8	12.82	15.26	17.43	13.16	15.63	14.41	15.07	14.58	14.8	15.18	31.42	18.58	20.15	21.83	33.26	43.86	47.17	AT2G39760.1	2.03e-168	BTB/POZ and MATH domain-containing protein 3 [Source:UniProtKB/Swiss-Prot;Acc:O22286]	BPM3_ARATH	2e-167
TRINITY_DN106945_c0_g1_i1.p1	0	0	0	0	0	0	0	0	0	0	0	0	0.54	0.45	0	0	0	0	0	0	0	AT5G47840.1	2.7e-77	Adenylate kinase 2, chloroplastic [Source:UniProtKB/Swiss-Prot;Acc:Q9FIJ7]	KAD2_ORYSJ	3.35e-116
TRINITY_DN106959_c0_g1_i1.p1	0	0	0	0	0	0	0	0	0	0	0	0	0	0.29	0	0	0	0	0	0	0.29	AT1G70760.1	3.4e-33	NAD(P)H-quinone oxidoreductase subunit L, chloroplastic [Source:UniProtKB/Swiss-Prot;Acc:Q9CAC5]	NDHL_ARATH	3.35e-32
TRINITY_DN10695_c0_g1_i2.p1	4.63	1.94	0.36	3.02	2.45	1.35	1.77	5.12	1.85	1.99	2.82	1.5	0.9	4.48	4.59	2.16	3.32	1.14	1.15	0	1.08
TRINITY_DN10695_c0_g3_i2.p1	1.93	0.45	3.73	1.16	2.81	0.52	0.51	1.36	0.53	2.63	0.54	1.27	1.57	1.72	0	0.5	1.9	0.44	0	0	0
TRINITY_DN10696_c0_g1_i5.p1	3.42	3.77	2.78	3.06	3.29	5.19	4.53	5.75	5.9	2.11	6.61	5.36	5.42	4.18	6.69	3.01	5.54	5.3	9.66	10.7	9.97	AT3G09320.1	1.8e-136	Probable protein S-acyltransferase 16 [Source:UniProtKB/Swiss-Prot;Acc:Q93VV0]	ZDHC6_ARATH	1.77e-135
TRINITY_DN10698_c0_g1_i6.p1	5.21	8.1	8.48	6.49	6.67	3.54	4.65	8.42	9.11	5.36	8.53	3.8	5.46	7.45	6.65	5.89	5.85	3.72	3.03	5.15	5.66	AT5G11460.1	4.54e-22		FLZ10_ARATH	4.47e-21
TRINITY_DN10699_c0_g1_i1.p1	0	0	0	0	0.6	0	0	0.58	2.04	0	0	1.06	0.68	0	1.2	1.29	0	0	5.01	2.37	0.51
TRINITY_DN1069_c0_g3_i1.p1	19.92	24.74	31.56	20.51	37.83	41.04	45.11	56.64	52.59	38.8	46.5	56.55	63.57	42.34	70.17	56.3	49.84	64.56	107.5	69.31	92.05	AT4G25030.2	1.37e-23
TRINITY_DN1069_c2_g1_i1.p1	37.06	41.35	45.7	37.74	44.29	41.48	32.03	52.45	47.91	54.79	56.17	43.17	48.58	40.32	51.58	50.79	42.3	49.17	51.02	51.38	44.18	AT4G25030.2	7.08e-124
TRINITY_DN106_c0_g1_i2.p1	21.55	32.27	41.53	29.79	34.68	36	28.78	45.19	49.59	46.09	41.38	50.7	43.18	40.85	51.41	56.26	67.56	86.49	89.77	57.38	70.34	AT2G28840.2	1.67e-166	Putative E3 ubiquitin-protein ligase XBAT31 [Source:UniProtKB/Swiss-Prot;Acc:Q94B55]	XB31_ARATH	6.81e-165
TRINITY_DN106_c0_g3_i3.p1	13.92	8.47	9.29	9.64	18.89	9.8	9.73	15.36	15.33	12.75	13.65	17.77	12.9	13.52	23.54	20.85	17.82	19.91	21.39	15.89	19.92	AT5G05930.1	8.99e-105		GCC1_ARATH	8.84e-104
TRINITY_DN10700_c0_g1_i5.p1	5.98	5.11	6.28	7.49	7.36	6.2	4.52	7.42	7.36	10.27	10.04	8.19	7.94	6.26	6	5.67	6.35	7.97	9.09	6.6	5.08	AT2G03270.1	0		SMBP2_MESAU	5.63e-168
TRINITY_DN10701_c1_g2_i1.p1	19.16	17.7	20.11	11.49	4.61	5.18	10.5	4.42	23.17	10.34	19.68	3.39	7.68	13.02	0	0	0	0	0	0	0	AT4G28250.1	3.6e-116	Expansin-B3 [Source:UniProtKB/Swiss-Prot;Acc:Q9M0I2]	EXB17_ORYSJ	2.28e-118
TRINITY_DN10704_c1_g1_i2.p1	27.51	32.38	28.2	20.56	25.25	36.35	34.62	38.08	29.08	30.08	23.46	40.07	32.25	23.05	44.21	29.34	28.4	37.06	35.79	44.76	62.17	AT3G18430.2	1.33e-69		CANB1_NAEGR	1.1e-25
TRINITY_DN107056_c0_g2_i3.p1	0	0	0	0	0	0	0	0	0	0.3	0	1.02	0.41	0	0	0.39	0.38	0	0	0	0
TRINITY_DN10705_c1_g1_i1.p1	0.65	0.59	0.56	0	0.63	0.34	0.34	1.51	1.07	1.81	1.42	3.81	4.47	1.14	2.27	0.33	0.32	0.88	1.77	2.52	3.39	AT4G21990.2	7.41e-69	5'-adenylylsulfate reductase 3, chloroplastic [Source:UniProtKB/Swiss-Prot;Acc:P92980]	APR3_ARATH	1.74e-66
TRINITY_DN10706_c0_g2_i2.p1	0.47	0.28	0.27	0	0.3	0	0.16	1.01	0.34	0.38	0.17	0.58	0.65	1.09	0.64	1.1	0.15	0.29	0.86	0.15	0
TRINITY_DN10709_c0_g1_i2.p1	3.17	2.9	5.46	2.84	8.07	6.31	3.33	7.02	6.08	7.5	7.46	7.07	8.89	5.25	5.51	4.05	6.24	6.09	10.78	6.13	5.78	AT1G65870.1	1.47e-50	Dirigent protein 21 [Source:UniProtKB/Swiss-Prot;Acc:Q9SS03]	DIR21_ARATH	1.45e-49
TRINITY_DN1070_c0_g1_i6.p1	13.72	13.44	20.04	14.14	15.99	20.96	21.92	26.12	22.34	16.57	13.28	19.44	28.63	23.63	48.71	32.47	31.21	26.89	44.52	34.95	34.85	AT3G51130.1	0	UPF0183 protein At3g51130 [Source:UniProtKB/Swiss-Prot;Acc:Q9SD33]	PHAF1_ARATH	0
TRINITY_DN10711_c1_g1_i1.p1	12.29	8.91	10.84	8.03	8.38	7.87	7.17	9.36	7.8	13.08	17.35	9.27	11.53	9.19	3.11	2.06	2.06	3.88	2.49	1.85	1.84	AT2G05920.1	0	Subtilisin-like protease SBT1.8 [Source:UniProtKB/Swiss-Prot;Acc:Q9ZUF6]	SBT18_ARATH	0
TRINITY_DN10712_c0_g1_i5.p1	2.22	2.14	1.03	0.84	1.1	0.79	1.37	2.15	1.99	2.05	1.93	2.11	2.68	2.28	3.15	2.88	3.42	2.52	5.02	2.05	2.24	AT4G30150.2	0
TRINITY_DN10713_c0_g1_i1.p1	2.41	2.2	3.12	1.98	0.77	1.22	1.42	2.75	1.51	3.68	3.22	3.55	3.57	2.49	3.25	2.37	2.95	3.01	1.18	0.97	0.9	AT3G63470.1	7.25e-144	Serine carboxypeptidase-like 40 [Source:UniProtKB/Swiss-Prot;Acc:Q0WRX3]	SCP1_MEDTR	4.14e-162
TRINITY_DN107140_c0_g1_i1.p1	0	0	0	0	0	0	0.56	0	0	0	0	0	0	0	0	0	0	0	0	0	0	AT1G08630.7	1.81e-84	Probable low-specificity L-threonine aldolase 1 [Source:UniProtKB/Swiss-Prot;Acc:Q8RXU4]	THA1_ARATH	2.71e-83
TRINITY_DN10715_c0_g2_i1.p1	32.98	32.85	25.91	16.68	21.04	25.34	24.94	31.88	24.53	27.55	28.01	23.47	27.84	32.22	34.08	28.87	32	30.58	35.64	35.46	32.64	AT1G19880.1	0		RCC2_HUMAN	6.64e-86
TRINITY_DN107164_c0_g1_i1.p1	0	0	0.25	0	0	0	0	0	0	0	0	0	0	0	0.58	0	0	0	0	0	0	AT4G23160.2	4.27e-54		POLR1_ARATH	9.41e-68
TRINITY_DN10716_c0_g1_i1.p1	0.34	0.45	0.52	0.6	0.08	0.17	0.09	0.47	0.28	0.56	0.71	0.48	0.26	0	0.35	0.17	0.08	0.31	0.16	0.17	0.15	AT1G19260.1	2.75e-158		ZMYM1_HUMAN	1.13e-26
TRINITY_DN10717_c0_g1_i3.p1	4.36	3.31	3.24	3.14	5.99	3.57	3.71	2.95	6.56	5.31	5.62	5	5.55	4.28	2.14	2.36	3.07	4.2	4.18	1.54	1.25	AT2G17550.1	1.27e-97
TRINITY_DN107186_c0_g1_i2.p1	0	0	0	0	0	0	0	0	0	0	0	0	0	0	0	0	0	0	0	0	1.03				AP1_ASPFN	1.78e-32
TRINITY_DN10718_c0_g1_i7.p1	0	0	0	0	0	0	0	0	0	0	0	0	0.6	0	0	0	0	0	0.5	0	0.46
TRINITY_DN107193_c0_g1_i1.p1	0	0	0.33	0	0.49	0.13	0.26	0.23	0.27	0.31	0.26	0	0.91	0.22	0	0.13	0	0	0.8	0.12	0	AT4G12700.1	0
TRINITY_DN10719_c0_g1_i1.p1	204.21	277.41	169.56	189.93	303.27	301	354.12	765.25	356.37	435.44	306.6	542.88	427.04	571.94	1062.39	1357.12	1276.67	1381.56	847.52	798.53	620.07	AT1G70890.1	4.69e-33	MLP-like protein 43 [Source:UniProtKB/Swiss-Prot;Acc:Q9SSK5]	KIRO_ACTDE	1.27e-38
TRINITY_DN1071_c0_g1_i11.p1	5.77	4.61	4.43	2.67	4.83	5.11	6.17	7.91	5.9	4.49	5.19	3.84	6.66	5.6	7.61	5.24	6.15	6.24	9.4	7.45	5.47	AT3G02890.1	6.17e-40		PHRF1_HUMAN	8.63e-07
TRINITY_DN1071_c1_g1_i13.p1	51.77	41.88	39.53	29.98	40.59	45.72	42.11	65.99	63.12	47.79	43.76	63.55	59.65	62.44	99.02	83.65	76.25	80.71	85.26	77.62	79.97	AT3G16910.1	0	Acetate/butyrate--CoA ligase AAE7, peroxisomal [Source:UniProtKB/Swiss-Prot;Acc:Q8VZF1]	CCL3_HUMLU	0
TRINITY_DN1071_c1_g1_i9.p1	5.22	4.85	9.03	7.87	6.59	2.24	2.07	7.95	14.48	12.17	23.31	9.16	4.09	3.24	0.96	2.8	2.48	3.02	0.21	0.15	0.14	AT1G66120.1	0	Butyrate--CoA ligase AAE11, peroxisomal [Source:UniProtKB/Swiss-Prot;Acc:Q9C8D4]	CNL_PETHY	0
TRINITY_DN1071_c2_g1_i4.p1	5.07	4.51	6.95	4.5	7.74	6.47	6.07	11.27	7.77	7.36	9.4	9.02	9.56	8.61	8.82	9.05	10.14	6.68	13.15	8.11	9.63	AT3G13870.1	0	Protein ROOT HAIR DEFECTIVE 3 [Source:UniProtKB/Swiss-Prot;Acc:P93042]	RHD3_ARATH	0
TRINITY_DN1071_c2_g2_i1.p1	20.49	18.14	19.43	16.51	16.92	19.35	11.78	24.73	24.97	27.58	23.4	21.18	25.83	21.69	27.66	32.21	27.2	21.35	41.5	27.45	19.91	AT1G72960.2	1.02e-75	Protein ROOT HAIR DEFECTIVE 3 homolog 1 [Source:UniProtKB/Swiss-Prot;Acc:Q9SSN0]	RHD3_ORYSJ	1.13e-78
TRINITY_DN1071_c4_g1_i2.p1	23.03	29.34	26.16	19.7	45.52	84.64	57.02	104.28	124.55	46.34	37.47	128.46	163.17	113.66	213.25	130.28	123.57	142.65	349.55	225.45	194.74	AT5G61210.1	1.98e-91	SNAP25 homologous protein SNAP33 [Source:UniProtKB/Swiss-Prot;Acc:Q9S7P9]	SNP33_ARATH	1.94e-90
TRINITY_DN1071_c5_g1_i11.p1	12.68	9.66	9.35	7.46	9.31	8.91	10.08	11.8	13.26	12.53	10.91	10.41	12.96	14.46	17.18	15.04	16.22	15.56	17.7	9.62	7.86	AT1G30470.1	0		PP6R3_CHICK	7.41e-58
TRINITY_DN10720_c0_g1_i8.p1	7.06	3.31	3.49	4.2	7.19	5.67	4.57	5.01	4.96	4.85	7.1	4.66	3.7	7.68	11.11	5.64	8.23	6.63	10.43	19.92	19.41	AT3G43860.1	1.8e-173	Endoglucanase 16 [Source:UniProtKB/Swiss-Prot;Acc:Q8VYG3]	GUN16_ARATH	1.77e-172
TRINITY_DN10721_c0_g1_i1.p1	120.79	141.93	106.95	64.29	143.57	92.85	167.55	279.91	200.93	165.29	180.66	228.89	234.43	228.86	450.37	598.29	526.5	488.26	312.01	383.4	471.73	AT1G70830.5	1.86e-33	MLP-like protein 28 [Source:UniProtKB/Swiss-Prot;Acc:Q9SSK9]	KIRO_ACTDE	7.19e-49
TRINITY_DN107235_c0_g1_i1.p1	0	0	0	0	0	0	0	0	0.71	0	0.35	0	0	0	0	0.33	0	0	0	0	0
TRINITY_DN107239_c0_g1_i3.p1	0	0	0	0.5	0	0	0.44	0.39	0.46	0	0	0.45	0	0.37	0.83	1.29	1.64	1.02	4.32	3.5	3.57
TRINITY_DN107239_c0_g1_i5.p1	0	0	0	0	1.17	1.28	0	0	0	0	0.44	1.71	0.43	0	0.79	1.22	0.79	2.28	5.65	4.76	1.71
TRINITY_DN107248_c0_g1_i1.p1	0	0	0	0	0	0	0	0	0	0	0	0	0	0	0	0	0.34	0	0	0	0	AT2G30390.1	8.12e-111	Ferrochelatase-2, chloroplastic [Source:UniProtKB/Swiss-Prot;Acc:O04921]	HEMH_ORYSI	8.18e-128
TRINITY_DN107271_c0_g1_i1.p1	0	0.54	0	0	0.57	0	0	0.55	0	0	0.67	0	0	0	0	0	0	0	0	0	0
TRINITY_DN10727_c0_g1_i2.p1	0	0	0.46	0	1.04	0	0	0	0	0	0	0	0	0	0	0	0	0	0.97	1.03	0	AT3G60340.1	2.58e-19		PPT1_CAEEL	7.4e-08
TRINITY_DN10727_c0_g1_i3.p1	2.89	1.09	0	0	1.7	0	0	0	0	0	0	1.01	0	1.57	0.57	0	0	0.52	0	0.56	0
TRINITY_DN10727_c0_g1_i5.p1	0.29	0.77	0.25	1.01	0.55	0	0	0.8	0.94	0.46	0.93	0.26	3	0.25	0	0.29	0.84	0	0	0	0	AT3G60340.1	6.7e-19		PPT1_CAEEL	1.33e-07
TRINITY_DN107285_c0_g1_i1.p1	0	0	0	0	0	0.54	0	0	0	0	0	0	0	0	0	0	0	0	0	0	0
TRINITY_DN10729_c0_g1_i1.p1	1973.89	2090.71	2411.18	2015.23	2138.59	2107.81	2000.51	2188.05	2014.68	2590.11	2462.3	2089.45	2192	1937.8	1331	1320.41	1411.48	1575.6	1146.47	1268.27	1100.49	AT3G12780.1	0	Phosphoglycerate kinase 1, chloroplastic [Source:UniProtKB/Swiss-Prot;Acc:Q9LD57]	PGKH_TOBAC	0
TRINITY_DN1072_c0_g1_i10.p1	14.18	14.89	14.56	11.36	14.77	16.79	16.08	17.65	21.35	17.15	16.91	21.84	20.16	20.43	36.79	27.15	29.52	27.75	44.31	34.98	39.76	AT4G36480.1	0	Long chain base biosynthesis protein 1 [Source:UniProtKB/Swiss-Prot;Acc:Q94IB8]	LCB1_ARATH	0
TRINITY_DN107300_c0_g1_i1.p1	0.58	1.63	0	0	0	1.26	0	0	0	0	0	0	0	0	0	0	0	0	0	0	0
TRINITY_DN107325_c0_g1_i1.p1	0	0	0	0	0	0	0	0	0	0	0.68	0	0	0	0	0	0	0	0	0	0.98	AT3G12160.1	5.25e-85	Ras-related protein RABA4d [Source:UniProtKB/Swiss-Prot;Acc:Q9LH50]	RAA4D_ARATH	5.16e-84
TRINITY_DN107326_c0_g2_i1.p1	0.39	0	0	0.46	0.38	0	0.41	0.36	0.85	0.31	1.72	0.35	0	0.69	0.39	0.4	0.38	0.35	0.35	0	1.33
TRINITY_DN107338_c0_g1_i1.p1	0	0	0	0	0	0	0	0	0	0	0.29	0	0	0	0	0.54	0.26	0	0	0	0
TRINITY_DN107357_c0_g1_i1.p1	0	0.24	0	0	0	0	0.28	0	0	0.43	0	0	0.28	0	0	0	0	0	0	0	0	ATMG01250.1	1.15e-16	Uncharacterized mitochondrial protein AtMg01250 [Source:UniProtKB/Swiss-Prot;Acc:P92555]	M1250_ARATH	1.13e-15
TRINITY_DN107363_c1_g1_i1.p1	0.5	0.22	0.65	0	0	0	0	0.93	0	0	0	0	0	0	0	0.25	0.25	0	0	0	0	AT1G32010.1	5.6e-08
TRINITY_DN107365_c2_g1_i1.p1	0.53	0.49	0	0	0.51	0.57	0	0.99	0	0	0	0.92	1.15	0	0.52	1.64	0.52	0	0	0	0.88
TRINITY_DN10736_c0_g1_i1.p1	0	0	0	0	0	0	0	0	0	0	0	0	0	0	0	0	0	0	0	0	0	AT5G03670.1	6.97e-57
TRINITY_DN10736_c0_g1_i3.p1	1.05	2.6	1.73	1	1.01	1.45	0.77	2.1	2.16	1.48	1.28	3.11	1.94	1.8	0.68	1.22	0.94	0.17	0.17	0.46	0.51	AT5G03670.1	1.03e-63
TRINITY_DN107377_c0_g1_i1.p1	0	0	0	0	0	0	0	0.3	0	0	0.35	0	0	0	0	1.32	0	0.29	0	0	0	AT1G21280.1	2.91e-10		POLR1_ARATH	1.45e-10
TRINITY_DN10737_c0_g1_i4.p1	2.17	0.91	2.76	2.25	2.85	2.33	1.85	1.78	2.84	2.42	3.32	4.99	2.57	2.94	0.81	1.24	1.9	2.49	2.07	2.32	1.74	AT2G13770.1	2.92e-31		ALPL_ARATH	6.67e-08
TRINITY_DN107391_c0_g1_i1.p1	4.11	3.86	7.06	7.85	9.18	7.69	6.94	7.76	5.85	9.06	4.75	5.1	8.41	7.42	1.15	4.91	6.37	5.29	9.06	8.51	5.88	AT1G44414.1	7.4e-38
TRINITY_DN1073_c0_g1_i5.p1	309.8	286.93	299.43	240.27	306.75	335.89	340.51	377.99	302.52	335.48	305.88	322.97	299.8	314.06	334.86	356.08	339.86	344.66	288.46	396.99	389.5	AT5G16660.1	2.3e-46
TRINITY_DN10741_c0_g1_i1.p1	11.19	12.03	8.42	7.93	8.04	10.11	11.94	12.9	13.63	11.33	9.98	11.18	15.1	10.38	15.85	15.83	14.63	18.38	20.16	14.61	16.18	AT5G42660.1	0		MUC70_ARATH	9.01e-58
TRINITY_DN107454_c0_g1_i1.p1	0	0.3	0	0	0	0	0	0	0	0	0	0	0.35	0.29	0	0	0	0	0	0	0	AT5G51110.2	4.18e-48		ATP1_ARATH	2.21e-46
TRINITY_DN107466_c0_g1_i1.p1	0	1.2	0	0	0.85	0	0	0	0	0	0	0.77	0.47	0	0	0	0	0	0	0	0	AT5G65660.1	1.63e-11	Uncharacterized protein At5g65660 [Source:UniProtKB/Swiss-Prot;Acc:Q9LSK9]	Y5566_ARATH	1.6e-10
TRINITY_DN10746_c0_g1_i3.p1	0	0	0	0	0.45	0	0	0	0	0	0.52	0.82	1.01	0	2.76	1.92	3.21	5.04	9.7	4.94	4.74	AT1G30620.5	2.55e-68	UDP-arabinose 4-epimerase 1 [Source:UniProtKB/Swiss-Prot;Acc:Q9SA77]	ARAE3_ORYSJ	2.78e-67
TRINITY_DN107472_c0_g1_i1.p1	4	1.64	1.15	4.79	1.73	2.38	1.88	0.42	0.49	0.35	0	0.79	0	0	0.44	0	0	0	0	0.43	0	AT2G34320.1	5.63e-08
TRINITY_DN107472_c0_g1_i1.p2	1.04	0	0.45	1.88	1.01	0.56	0.55	0	0	0.4	0	0.45	0	0	0.51	0	0	0	0	0	0	AT4G20520.1	8.7e-11		YTX2_XENLA	1.78e-14
TRINITY_DN107473_c0_g1_i1.p1	0.57	0	0	0	0	0	0	0.54	0	2.2	0	0	0	0	0	0	0	0	0	0	0	AT3G24255.4	5.42e-16		LORF2_HUMAN	5.72e-08
TRINITY_DN107474_c0_g1_i1.p1	0	0	0	0	0	0	0	0	0	0	0	0	0	0	0.58	0	0	0	0	0	0	AT1G43760.1	5.3e-13
TRINITY_DN107490_c0_g1_i2.p1	0	0.46	0.42	0	0	0.53	0.52	0	0	0	0	0	0	0	0	0	0.49	0	0	0.48	0				POLX_TOBAC	4.33e-17
TRINITY_DN1074_c0_g1_i1.p1	13.2	5.47	5.48	2.88	11.18	36.75	29.63	8.02	12.57	1.65	1	13.93	18.61	22.78	142.69	6.95	16.44	5.59	121.38	91.03	28.69	AT4G26140.1	0	Beta-galactosidase 12 [Source:UniProtKB/Swiss-Prot;Acc:Q9SCV0]	BGAL_MALDO	0
TRINITY_DN1074_c0_g1_i10.p1	0.42	0.79	0.28	0.25	0.22	0.18	0.36	0.41	0.2	0.56	0.43	0.33	0.48	0.47	1.04	1.75	0.29	1.11	0.84	0.46	0.27	AT4G26140.3	0	Beta-galactosidase 12 [Source:UniProtKB/Swiss-Prot;Acc:Q9SCV0]	BGAL_MALDO	0
TRINITY_DN1074_c0_g1_i11.p2	3.2	4.94	2.76	3.03	4.96	1.35	3.66	5.35	6.65	6.37	7.67	6.06	3.72	5.05	6.72	11.35	13.87	9.58	11.61	8.05	13.34	AT1G49880.1	2.17e-81	FAD-linked sulfhydryl oxidase ERV1 [Source:UniProtKB/Swiss-Prot;Acc:Q8GXX0]	ERV1_ARATH	2.14e-80
TRINITY_DN1074_c0_g1_i12.p2	30.38	24.67	22.62	18.72	20.64	23.13	27.19	38.63	25.71	32.12	26.86	22.04	29.85	30.51	35.47	29.17	25.65	25.37	23.67	21.82	24.72	AT3G02660.2	0	Tyrosine--tRNA ligase, chloroplastic/mitochondrial [Source:UniProtKB/Swiss-Prot;Acc:Q9M876]	SYYM_ARATH	0
TRINITY_DN1074_c0_g3_i2.p1	12.86	9.67	5.2	7.16	11.56	12.99	10.83	19.71	16.85	10.9	8.57	14.19	18.78	16.93	19.77	17.6	12.62	13.43	18.45	20.35	23.83	AT5G46560.1	1.3e-105
TRINITY_DN1074_c0_g4_i1.p1	18.51	13.68	17.25	12.03	29.56	33.37	27.48	27.39	27.7	26.59	18.4	27.57	32.8	35.17	43.56	29.68	34.41	33.98	80.84	71.36	47.99	AT2G32810.1	0	Beta-galactosidase 9 [Source:UniProtKB/Swiss-Prot;Acc:Q9SCV3]	BGAL9_ARATH	0
TRINITY_DN1074_c1_g1_i1.p1	224.72	233.25	237.25	192.81	164.21	171.92	164.09	143.13	163.49	168.96	179.16	172.21	166.68	179.68	176.75	183.69	222.78	220.29	169.05	194.22	167.58	AT1G48450.1	1.39e-103		UVB31_ARATH	2e-101
TRINITY_DN1074_c2_g1_i1.p1	0.54	0.79	2.01	0.63	0.52	1.1	2.01	0.99	1.74	1.3	1.13	1.32	3.14	2.16	2.52	1.42	1.05	1.63	2.27	0.52	0.48
TRINITY_DN107511_c0_g1_i1.p1	0.34	0.3	0.15	0	0.32	0.17	0	0	0.36	0	0	0	0.35	0	0.51	0	0	0.15	0.15	0.33	0.15
TRINITY_DN107524_c0_g2_i1.p1	0	0	0	0	0	0	0	0	0	0	0	0	0	0	0	0.5	0	0	0	0	0	AT4G25680.1	5.84e-76		PPDEX_ARATH	7.81e-14
TRINITY_DN107526_c0_g1_i1.p1	0	0	0	0	0	0	0	0	0	0.39	0	0	0	0.45	0	0	0	0	0	0	0	AT4G02570.4	3.57e-87	Cullin-1 [Source:UniProtKB/Swiss-Prot;Acc:Q94AH6]	CUL1_ORYSJ	6.59e-112
TRINITY_DN10752_c0_g1_i1.p1	94.49	91.67	98.47	68.75	151.76	195.98	170.82	260.48	245.52	127.62	86.84	238.32	254.34	243.94	538.6	341.95	323.81	325.17	589.05	619.07	774.62	AT3G05700.1	6.29e-76	Protein DEHYDRATION-INDUCED 19 homolog 3 [Source:UniProtKB/Swiss-Prot;Acc:Q84J70]	DI193_ARATH	6.19e-75
TRINITY_DN10752_c0_g1_i5.p1	2.1	0.86	3.06	2.48	6.63	2.99	9.93	16.71	14.31	1.4	2.5	22.53	15.48	9.86	19.38	32.51	14.56	22.67	35.11	17.77	30.04	AT5G26990.1	1.97e-27	Protein DEHYDRATION-INDUCED 19 homolog 6 [Source:UniProtKB/Swiss-Prot;Acc:Q6NM26]	DI196_ARATH	1.94e-26
TRINITY_DN10752_c1_g1_i2.p1	22.32	26.96	51.4	30.98	18.63	15.85	19.94	31.07	49.28	42.95	44.34	39.8	36.61	35.46	17.83	29	43.71	30.26	10.13	8.92	7.64	AT3G51895.1	0	Sulfate transporter 3.1 [Source:UniProtKB/Swiss-Prot;Acc:Q9SV13]	SUT31_ARATH	0
TRINITY_DN10752_c2_g2_i1.p1	0.24	0	0	0	0.24	0.51	0.25	1.13	0.27	0.2	0	0.45	0.51	1.06	0.49	1.71	0.48	0.22	0.66	0	0	ATMG00310.1	9.95e-22	Uncharacterized mitochondrial protein AtMg00310 [Source:UniProtKB/Swiss-Prot;Acc:P93295]	M310_ARATH	9.79e-21
TRINITY_DN10752_c2_g2_i3.p1	3.77	3.58	1.84	2.64	4.29	3.5	2.54	2.8	2.79	3.41	3	3.67	4.07	3.42	4.23	3.48	2.31	2.5	5.69	4.18	2.76	AT2G01390.1	0	Pentatricopeptide repeat-containing protein At2g01390 [Source:UniProtKB/Swiss-Prot;Acc:Q9ZU29]	PP139_ARATH	0
TRINITY_DN107538_c0_g1_i2.p1	0	0	0	0	0	0	0	0	0	0	0	0	0	0	0	0	0	0	0	0	0	AT4G23160.2	3.49e-51		POLR1_ARATH	1.56e-45
TRINITY_DN10754_c0_g2_i2.p1	92.93	80.05	74.93	63.85	63.46	64.34	55.91	80.45	85.8	99.43	106.93	78.21	78.13	85.41	87.97	89.59	94.41	86.71	88.54	87.23	100.25	AT3G57290.1	0	Eukaryotic translation initiation factor 3 subunit E [Source:UniProtKB/Swiss-Prot;Acc:Q9C5Z3]	EIF3E_ARATH	0
TRINITY_DN107554_c2_g1_i1.p1	0	0.54	0	0.36	0	0.32	0	1.12	0.33	0.24	0.98	1.09	1.27	1.05	0.3	0.3	1.18	0.27	0.27	0.58	0
TRINITY_DN10758_c0_g1_i10.p1	1.52	1.95	1.37	0	2.9	0	2.63	3.85	1.48	0	0	0	0	0	0	0	0.98	0	3.03	0	0	AT1G55840.1	2.25e-53		RETM_DROPS	4.39e-08
TRINITY_DN10758_c0_g1_i14.p1	33.29	30.62	27.66	28.63	20.47	17.53	22	29.9	36.94	26.59	32.9	28.08	20.2	26.19	23.18	30.03	31.59	34.7	24.07	15.3	24.25	AT1G55840.1	4.27e-165		SFH2_ARATH	3.34e-18
TRINITY_DN10758_c0_g1_i2.p1	13.83	12.12	18.74	13.74	17.97	12.08	10.72	14.87	24.32	20.14	23.07	16.98	16.32	14.89	22.21	25.11	24.38	25.85	24.33	19.89	18.47	AT1G55840.1	1.38e-168		SFH2_ARATH	4.49e-20
TRINITY_DN1075_c0_g1_i13.p1	2.05	5.04	3	1.34	4.99	1.66	0	0	0	4.8	1.38	1.85	4.39	1.13	1.01	1.83	0.77	2.88	2.79	4.62	1.73	AT1G09850.1	2.72e-10		CYSP4_BRANA	1.59e-10
TRINITY_DN1075_c0_g1_i4.p1	0	0.38	0.3	0.99	0.57	0	0.61	0.28	1.29	1.18	1.49	1.58	0.67	0.4	0.3	1.06	0.72	0.48	2.69	0.48	0.26	AT4G36880.1	1.04e-07		CYSP4_BRANA	8.9e-08
TRINITY_DN10760_c0_g1_i3.p1	2.73	2.01	2.46	3.83	2.73	3.13	1.38	1.04	2.33	3.06	3.43	2.43	3.02	1.85	0	0.44	0.45	1.24	0	0	0.1	AT5G20590.1	3.04e-168	Protein trichome birefringence-like 5 [Source:UniProtKB/Swiss-Prot;Acc:F4K5K4]	TBL5_ARATH	2.99e-167
TRINITY_DN10760_c2_g1_i1.p2	0	0	0	0	0	0	0	0	0.04	0	0	0	0	0	0	0.07	0	0	0	0	0	AT5G20590.1	9.32e-62	Protein trichome birefringence-like 5 [Source:UniProtKB/Swiss-Prot;Acc:F4K5K4]	TBL5_ARATH	9.17e-61
TRINITY_DN10761_c0_g1_i3.p1	101.74	101.46	125.22	90.31	86.87	76.88	81.59	89.9	118.96	104.7	112.54	98.67	96.27	109.98	65.49	82.09	95.66	97.64	64.31	53.66	39.13	AT5G17230.2	2.08e-124	Phytoene synthase, chloroplastic [Source:UniProtKB/Swiss-Prot;Acc:P37271]	PSY_CAPAN	2.33e-139
TRINITY_DN10763_c0_g3_i1.p1	1.82	0.72	0.39	0.63	0.35	0.83	1.47	2.08	0.98	1.19	0.47	1.1	2.59	1.94	4.79	1.7	1.07	0.99	2.63	2.99	4.5	AT2G36800.1	8.76e-179	UDP-glycosyltransferase 73C5 [Source:UniProtKB/Swiss-Prot;Acc:Q9ZQ94]	U73C5_ARATH	8.62e-178
TRINITY_DN10763_c0_g4_i1.p1	14.24	12.78	15.76	11.61	15.1	17.83	17.98	22.9	20.1	15.96	11.05	16.45	22.22	23.57	33.73	27.03	28.06	23.96	32.21	30.76	40.23	AT3G05580.1	0	Serine/threonine-protein phosphatase PP1 isozyme 9 [Source:UniProtKB/Swiss-Prot;Acc:Q9M9W3]	PP19_ARATH	0
TRINITY_DN10764_c0_g1_i1.p1	6.61	8.08	2.67	4.91	6.21	5.75	10.29	11.75	12.77	5.6	7.49	6.9	12.54	11.12	14.78	13.93	10.49	8.31	14.64	10.05	8.41	AT2G35230.3	1.9e-24	Protein HAIKU1 [Source:UniProtKB/Swiss-Prot;Acc:O82170]	IKU1_ARATH	1.87e-23
TRINITY_DN10765_c0_g1_i2.p1	0.77	1.09	0.27	0	0	0.79	1.57	0.71	0.83	0	0	0	0.79	1.33	0.78	1.83	0.45	0.42	0	0.15	0.96	AT5G48050.1	1.09e-15		POLR1_ARATH	6.21e-18
TRINITY_DN10765_c0_g1_i2.p2	1.19	2.14	0.26	1.05	0	0.31	0.92	0.55	0.97	0.24	0	0.27	0.94	1.3	1.19	1.5	1.17	0.54	0	0	0	AT4G23160.2	2.88e-30		POLR1_ARATH	7.16e-44
TRINITY_DN10765_c0_g1_i2.p3	3.08	0.84	0.53	0	0	0.32	1.92	2.29	1.68	0.25	0	0	0.97	1.08	1.54	0.62	1.51	0.28	0	0.89	0.8	ATMG00300.1	1.41e-08	Uncharacterized mitochondrial protein AtMg00300 [Source:UniProtKB/Swiss-Prot;Acc:P93293]	POLR2_ARATH	1.63e-23
TRINITY_DN10765_c0_g1_i2.p4	2.35	1.1	0	0	0	1.92	3.16	1.11	2.6	0.91	0	1.02	3.24	0	0.58	4.91	1.74	2.65	0.53	0	0.49				POLR1_ARATH	2.54e-20
TRINITY_DN107669_c0_g1_i1.p1	0	0	0	0	0	0	0	0	0	0	0	0	0	0	0	0	0	0	0	0	0	AT5G59240.1	2.26e-88	40S ribosomal protein S8-2 [Source:UniProtKB/Swiss-Prot;Acc:Q9FIF3]	RS8_ORYSJ	3.25e-110
TRINITY_DN107695_c0_g1_i1.p1	0	0.55	0	0	0	0.64	0	0	0	0	0	0	0	0	0	0	0	0	0	0	0	ATMG00300.1	4.33e-06	Uncharacterized mitochondrial protein AtMg00300 [Source:UniProtKB/Swiss-Prot;Acc:P93293]	POLR2_ARATH	7.03e-09
TRINITY_DN10769_c0_g1_i4.p1	58.12	59.69	54.88	41.76	53.47	61.79	60.44	73.25	65.71	65.4	56.52	67.77	62.77	71.37	112.79	108.67	108.66	114.95	117.52	122.24	114.8	AT1G30910.1	2.77e-154		MARC2_BOVIN	5.01e-44
TRINITY_DN1076_c0_g1_i7.p1	0.75	0.34	1.3	0.45	0.73	1.2	1.98	1.76	1.24	2.39	1.67	2.36	0.4	1.67	0.38	1.15	1.86	3.08	0.34	1.46	0.97	AT3G44110.1	2.73e-08	Chaperone protein dnaJ 3 [Source:UniProtKB/Swiss-Prot;Acc:Q94AW8]	DNJH_CUCSA	4.64e-08
TRINITY_DN10771_c0_g1_i1.p1	2.39	4.59	11.85	13.42	5.49	4.07	7.12	3.88	13.36	21.69	29.78	11.35	5.66	6.27	2.99	8.15	7.94	10.29	5.42	1.73	0.78	AT1G14890.1	1.74e-54		21KD_DAUCA	1.62e-36
TRINITY_DN107732_c0_g1_i2.p1	0	0	0	0	0	0	0	0	0	0	0	0	0	0	0	0	0	0	0	0	0	AT1G43760.1	6.02e-06
TRINITY_DN107762_c0_g1_i3.p1	0	0	0	0	0	0	0	0.39	0	0	0	0	0.45	0.37	0.41	0.43	0	0	0	0	0
TRINITY_DN10776_c0_g1_i1.p1	62.34	49.78	47.94	31.43	69.61	93.88	92.21	106.75	121.37	61.88	61.17	112.06	135.26	129.86	191.84	196.23	120.89	181.05	312.52	252.28	302.46	AT3G05200.1	1.19e-61	E3 ubiquitin-protein ligase ATL6 [Source:UniProtKB/Swiss-Prot;Acc:Q8RXX9]	ATL6_ARATH	1.17e-60
TRINITY_DN107788_c0_g1_i1.p1	0	0.28	0	0	0	0	0	0	0	0	0.33	0.28	0	0	0	0.31	0	0	0	0	0	AT4G29090.1	1.38e-15		RNHX1_ARATH	2.03e-06
TRINITY_DN10778_c0_g1_i1.p1	0.53	0.48	0.92	0.63	1.03	0.56	0.28	0.49	0.58	2.35	1.44	1.21	0	1.16	0.27	0	0.53	2.91	0	0	0	AT3G07040.1	7.69e-17	Disease resistance protein RPM1 [Source:UniProtKB/Swiss-Prot;Acc:Q39214]	RPM1_ARATH	7.56e-16
TRINITY_DN10778_c0_g5_i1.p1	1.9	0	0.54	3.09	1.86	0.7	0	1.2	1.41	1.94	0	3.28	0.7	0	4.34	0	0	2.28	1.72	1.84	1.05	AT3G07040.1	3.37e-11	Disease resistance protein RPM1 [Source:UniProtKB/Swiss-Prot;Acc:Q39214]	RPM1_ARATH	3.32e-10
TRINITY_DN1077_c0_g1_i1.p1	18.14	12.21	9.43	6.41	12.07	14.97	14.82	15.87	13.99	17	11.1	14.85	18.22	16.34	21.25	16.69	17.1	14.05	27.12	17.26	16.17	AT2G37520.1	0		IDM1_ARATH	3.21e-42
TRINITY_DN1077_c0_g2_i10.p2	0	0	0	0	0	0	0	0.55	1.32	0	0	0	0	1.08	0	1.81	0	0	0.53	1.16	0	AT4G17050.1	2.06e-49	(S)-ureidoglycine aminohydrolase [Source:UniProtKB/Swiss-Prot;Acc:Q8GXV5]	UGHY_ARATH	2.03e-48
TRINITY_DN1077_c0_g2_i11.p1	11.37	8.66	10.29	12.02	8.68	11.51	11.79	9.8	17.59	10.37	8.94	10.3	11.17	12.3	11.46	15.27	11.88	12.3	12.59	12.72	12.17	AT4G17050.1	5.21e-170	(S)-ureidoglycine aminohydrolase [Source:UniProtKB/Swiss-Prot;Acc:Q8GXV5]	UGHY_ARATH	5.13e-169
TRINITY_DN1077_c0_g3_i1.p2	11.95	10.44	7.41	6.71	11.07	13.51	11.86	15.49	14.9	13.83	11.76	10.93	16	17.29	27.29	15.6	19.46	13.55	29.92	21.6	17.95	AT2G36720.2	2.08e-33
TRINITY_DN1077_c0_g3_i3.p1	24.73	22.6	24.29	26.84	28.05	32.35	31.66	31.78	33.6	25.61	25.86	28.94	37.21	29.81	43.09	33.87	35.14	31.86	47.43	44.02	38.36	AT2G36720.2	0		IDM1_ARATH	2.9e-42
TRINITY_DN1077_c0_g4_i1.p1	94.75	93.02	15.57	14.12	93.88	88.94	90.42	112.31	48.57	88.33	43.48	47.2	62.42	36.64	23.05	15.1	14.79	24.99	32.49	54.62	79.54	AT5G51550.1	3.61e-180	Protein EXORDIUM-like 3 [Source:UniProtKB/Swiss-Prot;Acc:Q9FHM9]	EXOL3_ARATH	3.55e-179
TRINITY_DN10780_c0_g1_i8.p1	1.97	2.75	1.7	0.59	0.96	0	0.52	0.93	0.54	0	0	0.43	0.54	0.44	0.49	1.02	1.95	0.89	1.34	0.48	0
TRINITY_DN10782_c0_g1_i6.p1	15.03	10.28	15.52	9.88	11.13	15.96	14.97	17.95	23.57	15.8	15.27	17.35	19.58	22.95	28.39	18.55	17.98	19.15	31.75	28.87	26.54	AT3G24120.1	1.36e-105	Protein PHR1-LIKE 2 [Source:UniProtKB/Swiss-Prot;Acc:Q94A57]	PHL2_ARATH	1.34e-104
TRINITY_DN107839_c0_g1_i1.p1	0	0.5	0	0	0	0	0	0	0	0	0	0	0	0	0	0	0	0	0	0	0	AT2G45660.1	4.29e-23	MADS-box protein SOC1 [Source:UniProtKB/Swiss-Prot;Acc:O64645]	MAD50_ORYSJ	1.9e-102
TRINITY_DN107844_c0_g1_i2.p1	0	0	0	0	0	0	0	0	0	0	0	0	0	0	0	0	0	0	0	0	0	AT2G36530.1	1.64e-127	Bifunctional enolase 2/transcriptional activator [Source:UniProtKB/Swiss-Prot;Acc:P25696]	ENO_ORYSJ	6.06e-148
TRINITY_DN10784_c0_g1_i1.p1	5.12	0.48	2.2	1.24	2	1.11	2.73	0.96	1.13	2.39	1.17	2.7	1.12	2.29	2.02	0.53	1.01	0.92	2.79	2.97	1.73	AT3G23880.1	7.12e-20	F-box/kelch-repeat protein At3g23880 [Source:UniProtKB/Swiss-Prot;Acc:Q9LIR8]	FBK67_ARATH	7e-19
TRINITY_DN10784_c2_g1_i2.p1	0.4	1.85	2.78	0.48	0.39	1.72	0.85	1.51	2.66	1.27	2.69	2.52	3.03	0.72	0.4	0.41	2.39	4.02	5.86	2.73	1.39	AT3G06240.1	6.67e-15	F-box/kelch-repeat protein At3g06240 [Source:UniProtKB/Swiss-Prot;Acc:Q8GXC7]	FBK50_ARATH	6.56e-14
TRINITY_DN107852_c0_g1_i1.p1	0.61	0	0	1.08	0.29	0	0	0	0	0	0	0.27	0	0.8	0	0.61	0.3	0.27	0	0	0	AT4G23160.2	3.52e-56		POLR2_ARATH	1.57e-51
TRINITY_DN107881_c0_g1_i1.p1	0	0	0	0	0	0	0	0	0	0	0	0	0	0	0	0	0	0	0	0	0
TRINITY_DN10789_c0_g2_i1.p1	10.01	10.9	11.43	9.74	18.21	20.63	16.17	13.1	17.34	16.21	14.02	15.46	22.59	16.47	17.33	14.2	11.25	19.49	30.68	26.18	23.29	AT5G47310.1	2.19e-77		PPDEX_ARATH	2.37e-76
TRINITY_DN10789_c0_g2_i2.p1	0	0	0	0	0	0	0	0	0	0	0	0	0	0	1.49	0.64	1.75	0	0	0	0.56	AT4G17486.1	4.85e-73	DeSI-like protein At4g17486 [Source:UniProtKB/Swiss-Prot;Acc:Q93VG8]	PPDEX_ARATH	4.77e-72
TRINITY_DN1078_c1_g1_i1.p1	0.89	0.36	1.79	1.13	1.72	2.48	0.31	0.59	2.59	0.95	0.7	2.49	2.5	1.82	2.46	1.89	1.57	3.1	4.84	1.48	2.71	AT3G53690.1	5.62e-09
TRINITY_DN1078_c1_g1_i3.p1	2.3	1.68	1.7	3.8	8.57	5.17	3.07	3.31	0.72	2.09	3.52	7.01	4.51	4.61	6.46	4.56	6.66	8.46	13.98	6.92	8.39	AT3G53690.1	1.81e-09
TRINITY_DN1078_c1_g2_i2.p1	2.34	1.78	2.43	1.35	3.96	1.18	2.36	3.92	4.03	2.81	2.09	2.84	2.85	2.8	4.83	4.14	6.58	4.12	6.56	1.66	1.69	AT2G14830.1	1.93e-37
TRINITY_DN107908_c0_g1_i1.p2	0	0	0	0	0	0	0	0	0	0	0	0	0	0	0.81	0.2	0.2	0	0.73	0	3.58	AT3G02360.2	5.14e-62	6-phosphogluconate dehydrogenase, decarboxylating 3 [Source:UniProtKB/Swiss-Prot;Acc:Q9FWA3]	6PGD2_YEAST	1.61e-135
TRINITY_DN10790_c0_g1_i1.p1	1.08	1.64	0.31	0.86	1.05	0.38	0.75	0.34	0.39	0.86	2.38	1.62	0.38	2.54	1.08	2.57	1.77	0.33	2.94	0.35	0.93	AT1G78750.1	2.98e-17	F-box/FBD/LRR-repeat protein At1g78750 [Source:UniProtKB/Swiss-Prot;Acc:Q9ZV93]	FDL15_ARATH	1.89e-18
TRINITY_DN10790_c0_g3_i1.p1	2.23	1.61	2.19	1.41	2.14	1.96	1.74	1.95	2.41	2.9	1.79	3.59	2.59	2.26	2.78	2.7	2.89	2.95	4.5	4.31	2.1	AT3G03030.1	2.79e-21	F-box/LRR-repeat protein At3g03030 [Source:UniProtKB/Swiss-Prot;Acc:Q9M8U4]	FBL41_ARATH	2.74e-20
TRINITY_DN10790_c1_g1_i1.p2	0	2.03	0	0.53	0.43	1.41	0	1.23	0.48	1.72	0.49	0	0.47	0.78	3.05	2.26	0	0.79	1.59	0	0	AT4G23160.2	2.22e-22		POLR2_ARATH	4.1e-31
TRINITY_DN10791_c0_g1_i9.p1	1.05	3.56	2.56	3.05	3.69	4.12	2.31	4.81	4.53	4.79	5.5	5.78	9.7	4.96	5.97	3.64	2.74	3.96	4.42	2.52	2.32	AT3G07870.1	1.93e-17	F-box protein At3g07870 [Source:UniProtKB/Swiss-Prot;Acc:Q9SFC7]	FB135_ARATH	1.9e-16
TRINITY_DN107922_c0_g1_i1.p1	12.1	16.13	11.65	9.44	13.59	14.1	11.87	17.11	18.88	17.3	17.3	15.39	15.63	16.35	22.51	21.33	21.88	17.79	21.43	20.63	17.78	AT3G20630.1	0	Ubiquitin carboxyl-terminal hydrolase 14 [Source:UniProtKB/Swiss-Prot;Acc:Q8L6Y1]	UBP14_ARATH	0
TRINITY_DN10792_c0_g1_i3.p1	2.68	1.91	1.85	1.25	1.38	1.84	1.28	1.98	3.49	3.76	3.58	2.31	2.95	2.16	3.61	3.03	3.34	3.25	2.27	3.46	3.49	AT5G66380.1	7.47e-151	Folate transporter 1, chloroplastic [Source:UniProtKB/Swiss-Prot;Acc:Q7XA87]	FOLT1_ARATH	7.35e-150
TRINITY_DN10793_c0_g1_i1.p1	15.87	23.54	32.12	29.09	20.72	21.09	18.35	25.68	29.43	22.18	30.22	25.73	22.68	26.09	24.77	21.38	29.89	25.94	27.53	27.68	26.26	AT1G32260.1	1.81e-67
TRINITY_DN10794_c1_g2_i2.p1	5.31	3.03	7.22	4.44	8.11	4.52	1.96	3.42	3.34	6.82	5.57	5.91	4.53	3.99	3.02	1.55	3.7	3.3	2.22	1.78	2.69
TRINITY_DN10794_c1_g2_i3.p1	6795.57	6427.5	7037.94	6755.82	6641.38	6180	6448.12	3902.02	4472.69	5217.16	5086.02	4232	4067.97	4357.8	2317.26	2720.65	2888.33	3339.73	2190.9	2675.82	2653.06	AT1G31330.1	2.05e-104	Photosystem I reaction center subunit III, chloroplastic [Source:UniProtKB/Swiss-Prot;Acc:Q9SHE8]	PSAF_FLATR	2.37e-109
TRINITY_DN10794_c1_g2_i6.p1	103.98	107.57	129.36	120.17	103.98	80.08	91.76	66.28	73.82	125.33	93.77	118.14	69.48	69.68	40.53	57.75	70.33	79.24	49.18	57.55	58.96
TRINITY_DN10794_c3_g2_i2.p1	3.01	1.19	1.26	1.69	1.86	2.17	2.26	1.95	0.73	0.87	1.41	1.81	3.06	1.74	3.54	1.91	0.95	1.15	3.07	0.94	2.01	AT1G03230.1	5.08e-68		GIP2_NICBE	2.06e-65
TRINITY_DN107954_c0_g1_i3.p1	0	0	0	0	0	0.17	0.17	0.15	0.18	0	0	0.15	0.17	0	0.82	0.16	1.43	0.74	0.88	0.94	1.73	AT5G62180.1	2.05e-84	Probable carboxylesterase 120 [Source:UniProtKB/Swiss-Prot;Acc:Q9LVB8]	CXE1_ACTER	1.87e-95
TRINITY_DN10796_c0_g1_i12.p1	71.96	121.45	11.92	3.46	1.92	27.08	98.95	144.51	121.64	9.59	1.87	3.28	49.84	151.01	147.89	167.19	35.73	6.51	1.9	25.92	99.01	AT3G54500.2	3.61e-34	Protein LNK2 [Source:UniProtKB/Swiss-Prot;Acc:F4JCX9]	LNK2_ARATH	2.02e-32
TRINITY_DN10796_c0_g1_i16.p1	40.62	82.13	7.57	1.7	0.95	17.19	57.77	107.03	73.33	4.67	1.82	1.64	29.69	104.8	123.71	106.41	20.59	4.11	2.03	24.16	68.64	AT3G54500.5	2.67e-26	Protein LNK2 [Source:UniProtKB/Swiss-Prot;Acc:F4JCX9]	LNK2_ARATH	3.95e-14
TRINITY_DN10796_c0_g1_i27.p1	4.44	2.65	0.07	0	0.12	1.04	3.99	4.34	1.61	0.14	0.09	0.11	0.72	4.77	4.66	2.81	0.53	0.13	0.18	0.48	1.21	ATMG00860.1	6.83e-42	Uncharacterized mitochondrial protein AtMg00860 [Source:UniProtKB/Swiss-Prot;Acc:P92523]	YG31B_YEAST	4.08e-157
TRINITY_DN10796_c0_g1_i29.p1	5.98	10.71	2.51	0	0	4.95	10	22.77	35.28	2.24	0	0	11.79	19.95	29.27	38.58	8.79	1.37	0	1.68	22.25	AT3G54500.5	5.22e-27	Protein LNK2 [Source:UniProtKB/Swiss-Prot;Acc:F4JCX9]	LNK2_ARATH	6.12e-12
TRINITY_DN10796_c0_g1_i4.p1	20.37	33.15	1.93	1.02	0	6.01	28.13	36.46	27.79	1.21	0.69	1.13	8.81	44.49	35.11	41.97	8.21	0.68	2.45	4.63	28.5	AT3G54500.8	4.41e-15	Protein LNK2 [Source:UniProtKB/Swiss-Prot;Acc:F4JCX9]
TRINITY_DN10798_c0_g1_i1.p1	18.58	16.2	17.39	12.45	13.6	13.16	12.47	15.51	14.48	14.54	20.47	16.36	14.61	17.24	36.45	19.87	21.1	15.65	32.6	40.77	53.29	AT3G07750.2	1.42e-138		EXOS7_HUMAN	4.91e-44
TRINITY_DN10799_c0_g1_i1.p1	62.09	57.6	56.34	28.98	53.94	49.73	52.15	55.14	56.79	51.16	42.99	20.8	37.6	37.4	19.99	23.38	31.34	23.49	13.11	16.76	27.33	AT3G16570.3	1.11e-18	Rapid alkalinization factor 23 [Source:UniProtKB/Swiss-Prot;Acc:Q9LUS7]	RLF23_ARATH	1.09e-17
TRINITY_DN107_c1_g1_i1.p1	16.45	12.76	13.54	8.15	14.16	14.56	14.05	11.41	7.35	14.38	9.21	12.27	15.21	9.87	10.33	11.38	15.4	13.19	12.62	16.27	12.85	AT4G14500.1	1.06e-127		STAR7_HUMAN	6.32e-12
TRINITY_DN107_c2_g2_i1.p2	46.5	42.04	43.03	35.93	50.28	58.51	45.41	69.55	56.39	48.48	38.39	46.66	49.11	64.47	87.47	67.41	54.83	64.46	100.55	110.53	123.86	AT4G14500.2	2.13e-53
TRINITY_DN10800_c1_g1_i2.p1	9.73	10.57	7.28	5.69	7.93	8.76	7.98	13.17	9.19	12.01	10.79	10.55	13.88	9.61	13.2	9.58	8.19	10.76	16.42	8.4	7.83	AT4G03390.1	2.63e-88	Protein STRUBBELIG-RECEPTOR FAMILY 3 [Source:UniProtKB/Swiss-Prot;Acc:Q6R2K3]	SRF3_ARATH	2.59e-87
TRINITY_DN10800_c2_g1_i1.p1	8.47	9.42	16.99	15.05	16.1	11.85	8.47	14.58	19.4	15.46	14.88	16.11	10.95	11.13	9.89	11.23	19.57	17.87	24.88	19.24	16.73	AT1G07210.1	5.35e-50		RS18_THET8	9.34e-11
TRINITY_DN10800_c3_g1_i1.p1	3.03	1.47	3.95	2.33	5.74	5.96	4.82	3.07	3.77	4.89	4.72	6.31	4.27	4.66	9.62	5.31	7.91	7.52	22.9	8.4	5.35	AT2G18700.1	0	Probable alpha,alpha-trehalose-phosphate synthase [UDP-forming] 11 [Source:UniProtKB/Swiss-Prot;Acc:Q9ZV48]	TPS11_ARATH	0
TRINITY_DN108015_c0_g1_i3.p2	0	0	0	0	0	0	0	0	0	0	0	0	0	0	0	0	0	0	0	0	0	AT3G51030.1	3.01e-50	Thioredoxin H1 [Source:UniProtKB/Swiss-Prot;Acc:P29448]	TRXH_ORYSI	3.74e-76
TRINITY_DN10801_c0_g1_i5.p1	1.05	3.92	2.71	4.45	6.15	7.4	6.73	17.31	8.71	9.8	7.8	13.81	8.61	8.49	11.39	23.47	17.63	15.18	37.69	10.17	54.86	AT5G20230.1	5.11e-16	Blue copper protein [Source:UniProtKB/Swiss-Prot;Acc:Q07488]	CPC_CUCSA	2.93e-18
TRINITY_DN10802_c0_g1_i2.p1	58.89	78.38	57.01	53.04	58.51	61.06	66.66	79.24	66.64	55.76	46.58	74.82	59.64	74.43	77.6	73.27	80.09	93.34	86.99	96.04	124.45	AT5G64130.1	1e-48
TRINITY_DN10803_c0_g3_i1.p1	2.23	1.23	4.81	1.13	3.34	1	1.41	0.38	1.2	4.64	4.51	4.77	2.71	1.2	1.55	1.24	2.46	2.28	0.5	0	0.25	AT1G24430.1	5.37e-83		VINSY_RAUSE	2.29e-45
TRINITY_DN10804_c0_g1_i1.p1	26.47	18.47	26.51	18.9	24.75	29.3	24.78	25.88	28.48	37	32.39	29.92	33.59	28.89	46.3	48.86	48.2	51.93	73.9	63.93	54.75	AT4G38280.1	3.94e-12
TRINITY_DN108063_c0_g1_i1.p1	0.24	0	0	0	0	0.5	0.25	0.45	0	0	0	0	0	0	0.24	0	0	0	0.22	0	0.21	AT2G27080.1	7.15e-55		NHL13_ARATH	7.03e-54
TRINITY_DN108067_c0_g1_i2.p1	0	0	0	0	0	0	0	0	0	0	0	0.96	0	0	0	0	0	2.47	0	0	0	AT1G34580.1	5.37e-45	Sugar transport protein 5 [Source:UniProtKB/Swiss-Prot;Acc:Q93Y91]	STP5_ARATH	5.28e-44
TRINITY_DN10806_c0_g2_i1.p1	0	0	0.57	0	0.26	1.38	0	0.23	1.1	1.64	1.43	0.34	0	1.44	1.04	1.22	0.37	0	1.84	0.99	1.58	AT4G03250.1	1.44e-25
TRINITY_DN10807_c0_g1_i1.p1	19.44	21.34	25.93	19.71	20.49	20.83	14.61	12.23	24	28.03	28.7	26.87	19.5	18.82	31.3	42.54	48.89	53.61	67.16	49.42	42.87	AT5G42520.1	3.3e-131	Protein BASIC PENTACYSTEINE6 [Source:UniProtKB/Swiss-Prot;Acc:Q8L999]	BPC6_ARATH	3.25e-130
TRINITY_DN10808_c1_g1_i10.p1	2.46	2.81	2.58	0.21	2.03	2.71	4.3	5.01	2.09	2.99	1.67	3.24	2.72	4.7	5.49	3.85	5.35	5.59	6.21	4.08	2.81	AT1G62680.2	2.64e-71	Pentatricopeptide repeat-containing protein At1g62680, mitochondrial [Source:UniProtKB/Swiss-Prot;Acc:Q3ECK2]	PPR92_ARATH	2.6e-70
TRINITY_DN10808_c1_g1_i10.p2	0.49	0.46	0	0	0	1.06	0	0.93	1.63	0.38	0	0.43	1.61	0	0	0	0.49	0	0	0.48	0.83
TRINITY_DN10808_c2_g1_i3.p1	0.57	2.14	3.43	4.15	1.67	0	4.29	2.69	3.79	1.32	2.63	3.48	2.51	2.06	2.24	2.98	2.25	4.63	3.11	1.1	0	AT3G22470.2	3.45e-21	Pentatricopeptide repeat-containing protein At3g22470, mitochondrial [Source:UniProtKB/Swiss-Prot;Acc:Q6NQ83]	PP247_ARATH	3.57e-20
TRINITY_DN10809_c0_g2_i1.p1	0.41	0	0.18	0.72	0.59	0	0.42	0.19	0.67	0	0.43	0.19	0.21	0	0	0	0	0.19	0.93	0.39	0.36
TRINITY_DN10809_c0_g2_i1.p2	0	0	0	0	0	0	0	0.54	0	0	0	0.5	0.63	0	0.56	0.6	0	1.03	0.52	0.55	0
TRINITY_DN10809_c0_g3_i3.p1	0.91	1.2	0.78	0.53	0.22	0.23	0.57	0.21	1.34	1.2	2	1.05	0.35	1.36	1.49	1.12	2.33	1.65	1.43	0.88	0.91	AT1G20200.1	1.11e-28	26S proteasome non-ATPase regulatory subunit 3 homolog A [Source:UniProtKB/Swiss-Prot;Acc:Q9LNU4]	PSMD3_TOBAC	5.63e-28
TRINITY_DN10809_c0_g5_i1.p1	0.45	1.24	1.93	0	0.44	0.48	0	0.42	0	1.76	0.5	0.8	0	0.4	0.89	0.46	0.44	1.22	0.82	0.87	0.38
TRINITY_DN10810_c0_g1_i5.p1	4.78	7.85	5.5	10.48	8.94	6.41	7.3	5.32	10.12	7.88	12.34	8.99	7.53	4.35	8.19	7.1	13	15.88	7.75	4.53	6.78	AT3G12040.1	6.32e-98	DNA-3-methyladenine glycosylase [Source:UniProtKB/Swiss-Prot;Acc:Q39147]	3MG_ARATH	6.22e-97
TRINITY_DN10810_c0_g1_i8.p1	1.08	1.73	4.34	0	0	0	0	0.64	0	1.02	2.38	2.18	1.27	1.61	0	0	1.35	0.67	2.8	0.73	0.58	AT3G12040.1	9.12e-95	DNA-3-methyladenine glycosylase [Source:UniProtKB/Swiss-Prot;Acc:Q39147]	3MG_ARATH	8.98e-94
TRINITY_DN108155_c0_g1_i2.p1	0	0	0	0	0.47	0	0	0	0	0	0	0	0	0	0	0	0	0	0	0	0	AT2G40960.1	1.86e-44		R3HD2_MOUSE	1.3e-07
TRINITY_DN10816_c0_g1_i4.p1	89.58	93.86	76.24	60.56	73.29	81.71	101.61	132.25	136.04	100.79	82.25	96.41	120.5	132.79	137.27	158.72	159.83	156.58	126.48	110.84	103.14	AT5G11840.1	9.86e-95		GLD27_ARATH	7.53e-40
TRINITY_DN10816_c1_g2_i2.p1	75.78	75.81	49.14	41.67	71.03	73.64	66.94	65.93	62.4	82.54	51.3	51.49	47.38	51.75	46.58	40.33	66.25	69.92	64.22	83.19	68.51	AT4G35020.3	9.13e-124	Rac-like GTP-binding protein ARAC3 [Source:UniProtKB/Swiss-Prot;Acc:Q38912]	RAC1_LOTJA	6.03e-124
TRINITY_DN10817_c0_g1_i1.p1	17.14	13.49	12.3	12.68	17.04	18.24	16.74	13.34	9.86	10.93	12.25	11.99	13.56	16.26	19.45	17.55	14.88	16.25	18.51	25.65	18.53	AT3G23600.1	6.12e-71		E134_MAIZE	1.63e-20
TRINITY_DN10817_c0_g1_i9.p1	143.28	122.72	121.41	103.51	134.52	152.61	143.52	179.46	130.49	131.71	124.8	148.79	135.66	137.49	183.56	186.86	178.72	208.8	164.94	229.45	226.7	AT3G23600.1	3.68e-115		E134_MAIZE	5.57e-46
TRINITY_DN108185_c0_g1_i1.p1	0.55	0	0	0	0	0	0.59	0	0.61	0	0	0.48	0.6	0	0.54	0.57	1.62	0.99	0.99	0.53	2.75	AT4G37850.2	1.42e-30	Transcription factor bHLH25 [Source:UniProtKB/Swiss-Prot;Acc:Q9T072]	BH025_ARATH	1.39e-29
TRINITY_DN1081_c1_g1_i1.p1	0	0	0	2.33	0	0	0.25	0	1.41	0	0	1.71	0	0	0	0	0	0	0	0	0	AT2G05840.1	6.12e-10	Proteasome subunit alpha type-6-B [Source:UniProtKB/Swiss-Prot;Acc:O81147]	PSA6B_ARATH	6.02e-09
TRINITY_DN108219_c0_g1_i1.p2	0	0	0	0	0	0	0	0	0	0	0	0	0	0	0	0	0.53	0	0.49	0	1.36	AT5G23020.1	2.07e-13	Methylthioalkylmalate synthase 3, chloroplastic [Source:UniProtKB/Swiss-Prot;Acc:Q9FN52]	HOSM_PENRW	1.35e-80
TRINITY_DN108224_c0_g1_i2.p1	1.9	2.46	3.59	3.56	2.77	3.11	2.55	4.21	4.67	2.66	3.92	3.87	5.42	4.94	2.29	3.38	2.57	2.71	4.25	2.62	2.36	AT5G48560.1	7.62e-79	Transcription factor bHLH78 [Source:UniProtKB/Swiss-Prot;Acc:Q9FJL4]	BH078_ARATH	7.5e-78
TRINITY_DN108224_c1_g1_i6.p1	0	0.64	0.11	0	0.47	0.62	0.62	0.45	0.26	0.2	0.13	0.34	0.5	1.15	0.37	0.24	0	0	1.32	0.71	0.87	AT4G23060.1	1.9e-18		IQD22_ARATH	1.87e-17
TRINITY_DN10825_c0_g1_i6.p1	0	1.39	0.33	0.45	0.37	0.81	0	0.36	0.84	0.3	0	0.68	0	1.68	0.76	1.55	0.38	3.45	4.49	2.95	4.59	AT4G00960.4	1.1e-33	Putative receptor-like protein kinase At4g00960 [Source:UniProtKB/Swiss-Prot;Acc:O23082]	CRK44_ARATH	3.88e-32
TRINITY_DN10825_c0_g2_i2.p1	0.95	0	0.82	0	1.84	1.67	0	1.18	0	1.26	0.69	0.57	0.67	1.67	4.76	2.57	3.44	2.59	5.18	7.98	2.76	AT4G21230.1	4.58e-32	Cysteine-rich receptor-like protein kinase 27 [Source:UniProtKB/Swiss-Prot;Acc:O49564]	CRK27_ARATH	4.5e-31
TRINITY_DN10825_c0_g2_i4.p1	6.32	7.79	2.72	0	3.72	8.35	6.16	7.2	7.03	2.43	4.44	5.46	12.65	10.33	9.91	8.65	14.37	11.4	19.54	22.65	17.83	AT4G00970.1	2.84e-25	Cysteine-rich receptor-like protein kinase 41 [Source:UniProtKB/Swiss-Prot;Acc:O23081]	CRK41_ARATH	2.79e-24
TRINITY_DN10825_c1_g1_i5.p1	0	0	1.48	0.58	0.95	0.77	1.01	0.23	0.53	1.38	0.26	0.67	1.54	0.43	1.23	0.74	1.45	1.34	1.11	0.95	0.65	AT4G21410.2	1.72e-23	Cysteine-rich receptor-like protein kinase 29 [Source:UniProtKB/Swiss-Prot;Acc:Q8S9L6]	CRK29_ARATH	2.87e-22
TRINITY_DN10825_c2_g2_i1.p1	0	0	0	1.78	3.37	1.06	1.57	3.24	0.54	1.54	0.56	1.74	1.61	5.73	12.67	4.58	9.24	6.24	8.51	3.34	1.67	AT4G00970.1	8.7e-28	Cysteine-rich receptor-like protein kinase 41 [Source:UniProtKB/Swiss-Prot;Acc:O23081]	CRK41_ARATH	8.56e-27
TRINITY_DN108267_c0_g1_i1.p1	0	0	0	0	0	0	0	0	0	0	0	0	0	0	0	0	0	0	0	0	0	AT1G73540.1	4.76e-50	Nudix hydrolase 21, chloroplastic [Source:UniProtKB/Swiss-Prot;Acc:Q8VY81]	NUD21_ARATH	4.69e-49
TRINITY_DN10826_c0_g3_i1.p1	0	1.61	1.46	4.13	2.07	2.63	0	5.51	6.01	4.35	2.95	3.78	12.85	8.99	18.6	7.2	5.44	6.11	11.21	11.4	2.9	AT3G16230.8	5.67e-12
TRINITY_DN108276_c0_g1_i1.p1	6.67	3.82	0.8	0.11	1.33	1.6	2.52	2.2	1.2	1.06	1.34	1.12	1.13	0.95	0	0.18	0.18	0	0	0	0	AT5G44670.1	0	Galactan beta-1,4-galactosyltransferase GALS2 [Source:UniProtKB/Swiss-Prot;Acc:Q9LTZ9]	GALS2_ARATH	0
TRINITY_DN10829_c0_g1_i1.p1	3.34	2.14	0.82	1.68	0.46	2.23	1.96	2.2	0.52	1.72	1.27	0	1.49	4.56	0.96	4.54	2.34	3.25	0.65	0.23	0.84	AT1G34070.1	1.49e-15		POLR1_ARATH	4.38e-13
TRINITY_DN10829_c0_g1_i4.p3	2.25	1.05	0.97	0	1.1	0.61	1.81	1.59	1.87	1.31	0.65	0	2.47	6.08	1.11	3.52	1.11	1.01	0.51	0.54	0.47
TRINITY_DN10829_c0_g1_i5.p1	1.21	1.15	0.48	1.4	0.45	0.85	1.04	1.71	1.01	0.76	0.77	0.52	1.04	2.39	0.66	1.29	1.28	0.76	0.42	0.18	0.42	ATMG00710.1	8.68e-07	Uncharacterized mitochondrial protein AtMg00710 [Source:UniProtKB/Swiss-Prot;Acc:P92512]	POLR2_ARATH	1.08e-98
TRINITY_DN10830_c2_g1_i2.p1	0	0.27	0.26	0	0	0.28	1.38	0.98	0	0.63	0	0.54	0.46	0.71	0.71	0.39	0.5	0.94	0	0	0.19	AT2G25760.1	2.47e-147		HD16N_ORYSJ	1.52e-132
TRINITY_DN10830_c2_g1_i3.p1	1.55	0.58	2.02	1.2	0.74	0.82	1.74	1.08	0.84	0	1.48	2.18	1.07	1.07	0.97	2.48	3	2.27	2.1	0.12	0.88	AT2G25760.1	1.49e-164		HD16N_ORYSJ	1.44e-143
TRINITY_DN10832_c0_g2_i1.p1	0	0.33	0.31	0	0.71	0	0.38	1.36	0	0.58	0.4	0	1.16	0.32	0	1.48	1.07	0.33	1.65	0.35	0.94
TRINITY_DN108357_c0_g1_i1.p1	0	0.49	0	0	0	1.14	0	0	0	0	0	0	0	0	0	0	0	0	0	0	0
TRINITY_DN10835_c0_g3_i1.p1	17.19	15.02	13.9	9.91	13.35	15.08	14.04	24.58	23.12	31.29	28.18	22.96	29.7	24.54	39.1	30.71	29.28	29.98	42.33	28.89	28.83	AT1G09620.1	0	Leucine--tRNA ligase, cytoplasmic [Source:UniProtKB/Swiss-Prot;Acc:F4I116]	SYLC_ARATH	0
TRINITY_DN10836_c0_g1_i11.p1	28.67	41.02	33.03	30.91	28.47	28.23	32.75	21.19	36.76	43.86	39.64	37.76	36.84	37.16	26.27	22.31	20.71	31.45	26.96	23.78	15.12	AT5G04440.1	5.12e-95
TRINITY_DN10836_c0_g3_i1.p1	1.19	2.02	2.45	1.38	2.14	2.41	3.3	2.45	2.48	2.8	2.68	2.5	3.09	3.05	4.3	2.92	4.01	2.37	4.64	3.66	2.55	AT4G11670.1	4.45e-173		UNC13_ARATH	1.75e-94
TRINITY_DN108377_c1_g1_i2.p1	0.81	1.85	1.74	0.97	2.75	0.86	4.25	0.38	0.44	1.59	0.9	1.8	3.89	1.43	0	0.83	1.59	1.1	0.37	0.39	0.35	AT3G61660.2	1.39e-07
TRINITY_DN10839_c0_g1_i1.p1	10.55	11.32	5.1	4.09	50.15	59.3	37.2	76.92	25.73	22.04	11.82	44.16	79.63	54.55	66.7	32.12	25.49	39.15	78.77	63.54	52.08	AT4G07960.1	1.08e-114	Probable xyloglucan glycosyltransferase 12 [Source:UniProtKB/Swiss-Prot;Acc:Q9ZQB9]	CSLCA_ORYSJ	2.31e-116
TRINITY_DN10839_c0_g2_i1.p1	10.57	12.11	9.44	11.95	68.57	75.13	51.41	77.73	35.22	23.51	15.59	58.39	82.81	73.83	72.73	46.32	35.9	43.34	84.05	75.51	47.89	AT4G07960.1	5.85e-130	Probable xyloglucan glycosyltransferase 12 [Source:UniProtKB/Swiss-Prot;Acc:Q9ZQB9]	CSLCC_ARATH	5.75e-129
TRINITY_DN1083_c0_g2_i1.p1	558.34	565.31	531.89	571.99	753.67	614.35	576.1	593.52	490.96	581.44	582.37	547.24	569.41	498.25	485.5	589.91	521.08	543.25	490.02	447.14	413.36
TRINITY_DN108408_c0_g1_i1.p1	0	0	0	0	0	0	0	0	0	0.41	0	0	0	0	0	0	0	0.48	0	0	0	ATMG00860.1	5.89e-13	Uncharacterized mitochondrial protein AtMg00860 [Source:UniProtKB/Swiss-Prot;Acc:P92523]	TF26_SCHPO	5.01e-18
TRINITY_DN10840_c0_g1_i11.p1	0.5	0.64	0.58	0.71	0.27	0.11	0.51	1.07	0.48	0.6	0.4	0.47	0.62	0.33	1.08	0.82	1.37	0.76	0.96	0.38	0.25	AT4G23160.2	6.1e-160		POLX_TOBAC	1.56e-141
TRINITY_DN10840_c0_g1_i17.p1	1	1.43	0.69	0.7	0.19	0.62	0	0.37	1.52	1.13	0.64	0.74	0.41	0.52	0.81	0.6	1.97	0.36	1.27	0	0	AT4G23160.2	1.89e-73		POLR1_ARATH	1.21e-64
TRINITY_DN10845_c0_g1_i6.p1	0.88	0.79	0.76	0.52	0.42	0.68	0.23	1.42	0.72	0.35	1.64	1.21	0.23	2.1	0.44	1.98	1.08	1	3.19	0.85	0.78	AT4G11450.1	8.94e-12
TRINITY_DN108467_c0_g1_i2.p1	0.18	0.48	0.16	0.64	0.18	0	0.19	0.25	0	0.15	0.19	0.51	0	0.16	0	0.09	0.09	0.42	0.17	0.18	0.17	AT3G19230.1	0		Y1677_ARATH	1.4e-49
TRINITY_DN10847_c0_g1_i1.p1	5.31	7.11	13.24	9.58	3.15	4.64	5.02	6.97	10.42	7.98	9.32	3.56	5.93	8.32	9.26	9.79	15.26	9.1	7.28	8.89	9.21	AT2G41640.1	1.12e-92		MUC21_ARATH	6.4e-82
TRINITY_DN108488_c0_g1_i1.p1	0	0.74	0	0	0	0	0	0	0	0	0	0	0.43	0	0	0	0	0	0.37	0	0				PIF1_CANAL	1.72e-06
TRINITY_DN1084_c0_g1_i1.p2	16.89	11.92	8.37	12.36	6.31	6.64	10.92	10.12	5.09	4.39	9.33	6.74	9.49	7.8	7.58	3.72	4.04	7.86	6.04	1.98	1.73	AT4G29090.1	1.64e-21		M310_ARATH	5.62e-18
TRINITY_DN1084_c0_g5_i2.p1	1.83	0.94	2.71	4.32	3.79	1.09	2.43	0.24	0.28	0.84	0.84	0.48	0.27	0.91	0	0	0	0.24	0	0	0
TRINITY_DN1084_c0_g5_i2.p2	1.48	0.46	0.85	1.78	3.85	2.13	2.1	0.46	0	0.77	0	0	0.54	0.44	0	0	0	0.45	0	0	0				POLX_TOBAC	7.6e-11
TRINITY_DN10850_c0_g1_i4.p1	0	0	0	0	0	0	0.35	0	0	0	0.31	0	1.18	0	0.44	0	0	0	0.32	0	0.21	AT4G23160.2	1.07e-27		COPIA_DROME	5.97e-37
TRINITY_DN10850_c0_g1_i7.p1	0.62	0.55	0.53	0.36	0.45	0.48	0	0.57	0	0.13	0.73	0	0	1.07	0	0.49	1.06	0	0.35	0	0.47	AT4G23160.2	1.18e-27		POLX_TOBAC	1.13e-35
TRINITY_DN10850_c0_g1_i8.p1	0	0	0	0	0	0	0	0	0.48	0	0	0.55	0	0	0	0.71	0	0.81	0	0	0	AT4G23160.2	1.15e-27		POLX_TOBAC	1.2e-34
TRINITY_DN10851_c0_g1_i1.p1	2.08	2.26	1.51	0	0.69	2.39	1.39	0.21	0.19	0	0.86	0.44	0	0.53	0	0	0	0	0	0	0	AT5G54160.1	1.46e-122	Flavone 3'-O-methyltransferase 1 [Source:UniProtKB/Swiss-Prot;Acc:Q9FK25]	COMT1_ROSCH	5.72e-130
TRINITY_DN10851_c0_g1_i3.p1	2.9	3.11	1.09	0.35	2.24	2.71	2.1	2.73	1.53	0.72	0.97	0.81	1.89	0	0	0	0	0	0	0.29	0	AT5G54160.1	1.27e-22	Flavone 3'-O-methyltransferase 1 [Source:UniProtKB/Swiss-Prot;Acc:Q9FK25]	COMT1_MEDSA	1.17e-26
TRINITY_DN10851_c0_g1_i8.p1	0.75	0.59	0	0.42	0	3.09	2.65	3.09	0	0.28	0	0.49	0	0.15	0	0	0	0	0	0	0	AT5G54160.1	1e-63	Flavone 3'-O-methyltransferase 1 [Source:UniProtKB/Swiss-Prot;Acc:Q9FK25]	COMT1_ROSCH	5.86e-67
TRINITY_DN10852_c0_g1_i1.p1	9.24	7.3	8.3	7.39	7.48	6.73	5.96	8.8	9.46	6.35	10.98	9.92	8.71	7.1	8.74	7.94	7.3	8.19	8.8	9.85	7.63	AT4G29890.1	0	Choline monooxygenase, chloroplastic [Source:UniProtKB/Swiss-Prot;Acc:Q9SZR0]	CHMO_ARATH	0
TRINITY_DN10853_c1_g2_i1.p1	4.33	5.78	4.71	5.03	4.51	4.92	2.51	5.22	4.68	5.04	4.89	3.9	3.42	4.99	4.38	5.87	8.13	7.99	11.98	7.65	6.98	AT1G27600.1	4.09e-155	Probable beta-1,4-xylosyltransferase IRX9H [Source:UniProtKB/Swiss-Prot;Acc:Q9SXC4]	IRX9H_ARATH	4.03e-154
TRINITY_DN108541_c0_g1_i1.p1	0	0.52	0.25	1.37	0.84	0.3	0	0.27	0.63	0.23	0.31	0.53	0.61	0.25	2.9	1.17	0	0	1.05	1.96	3.8	AT5G13330.1	2.91e-27	Ethylene-responsive transcription factor ERF113 [Source:UniProtKB/Swiss-Prot;Acc:Q9LYU3]	EF113_ARATH	2.86e-26
TRINITY_DN10854_c0_g1_i1.p1	0.85	1.57	0.37	1.02	1.24	0	0.9	0.4	1.4	0.67	0	1.51	0	0	1.69	1.31	0.42	0.38	0	1.65	1.09
TRINITY_DN10854_c0_g1_i5.p1	1.07	0.33	0.31	1.27	0.35	0.38	0.37	0	1.96	0	0.39	0.64	0	0.63	0.36	0.36	0	0.32	0.32	0.35	0.62
TRINITY_DN10856_c0_g1_i2.p1	6.16	5.31	3.23	4.13	5.3	4.78	3.61	5.28	4.54	4.78	5.15	4.83	4.57	5.54	7.74	4.4	4.97	4.8	5.58	4.04	8.34	AT5G43140.1	1.5e-83		PX24D_DICDI	4.34e-22
TRINITY_DN108587_c1_g1_i1.p1	1.06	0.97	0	0.42	2.06	1.12	1.48	0	0.78	0	1.55	0.32	0	0.31	0	0.36	0	0	0.32	0	0	AT2G41475.1	1.83e-20		ATS3A_ARATH	1.8e-19
TRINITY_DN10858_c0_g1_i2.p1	3.73	1.23	1.17	0	3.28	2.5	4.6	1.89	0	1.08	0.74	0.92	1.44	0.6	0	0	0.33	0	0.62	0.33	0	AT5G49360.1	9.75e-95	Beta-D-xylosidase 1 [Source:UniProtKB/Swiss-Prot;Acc:Q9FGY1]	BXL1_ARATH	9.6e-94
TRINITY_DN108592_c0_g2_i1.p1	0.9	0.38	1.25	1.21	0.76	0.2	0	0.18	0.1	0.32	0.33	0.15	0	0.12	0.15	0.14	0.5	0.35	1.87	1.1	0.23	AT4G37370.1	1.89e-143		CYQ32_CATRO	1e-149
TRINITY_DN108592_c0_g2_i2.p1	0.25	0.37	0	0.23	0.61	0.19	0.28	0.09	0	0.15	0.16	0.29	0.38	0.45	0.14	0.14	0.16	0.68	0.13	0.2	0.11	AT4G37370.1	1.26e-132		CYQ32_CATRO	1.34e-139
TRINITY_DN108628_c0_g1_i1.p1	0.41	0	0	0	0	0	0	0	0	0	0	0	0	0	0	0	0	0.37	0	0	0				POLR2_ARATH	2.9e-53
TRINITY_DN108630_c2_g1_i1.p1	2.09	2.53	1.5	2.48	0.67	1.1	0.73	1.62	1.14	1.1	1.53	0.63	0.37	0.61	0	0	0.69	0	0	0	0	AT1G58170.1	1.42e-77	Dirigent protein 19 [Source:UniProtKB/Swiss-Prot;Acc:Q9C523]	DIR19_ARATH	1.4e-76
TRINITY_DN10863_c0_g2_i1.p1	21.94	24.29	59.99	51.33	40.94	27.11	24.97	40.41	61.85	57.8	50.41	43.65	37.86	32.82	30.75	46.77	37.85	46.45	27.82	21.2	16.9	AT2G47910.1	9.15e-97	Protein CHLORORESPIRATORY REDUCTION 6, chloroplastic [Source:UniProtKB/Swiss-Prot;Acc:O82258]	CRR6_ARATH	9e-96
TRINITY_DN10863_c1_g2_i1.p1	14.85	10.16	7.2	4.05	5.09	11.75	16.87	8.81	11.47	5.09	4.96	6.53	9.9	16.55	12.69	6.29	7.19	5.54	12.89	22.79	20.49	AT3G21700.3	1.06e-101		SPG1_SCHPO	6.18e-56
TRINITY_DN108646_c0_g1_i1.p1	0	0	0	0	0	0	0	0	0	0	0	0	0	0	0	0	0	0	0.53	0	0.48
TRINITY_DN10865_c0_g1_i16.p1	4.35	4.84	4.23	4.24	5.76	5.41	3.52	6.67	5.5	5.57	6.88	5	6.55	5.01	7.67	6.86	6.77	6.92	9.36	8.23	12.87	AT4G05460.1	1.29e-57	F-box protein SKIP19 [Source:UniProtKB/Swiss-Prot;Acc:Q9M0U9]	SKI19_ARATH	1.27e-56
TRINITY_DN10865_c0_g1_i9.p1	8.99	13.79	11.22	8.81	7.17	8.26	8.19	6.31	13.76	11.84	8.97	11.34	12.76	13.16	14.22	17.68	16.36	15.96	19.46	18.45	19.98	AT2G27450.1	1.52e-153	N-carbamoylputrescine amidase [Source:UniProtKB/Swiss-Prot;Acc:Q8VYF5]	AGUB_SOLTU	1.69e-156
TRINITY_DN10868_c0_g1_i1.p1	1.04	1.39	0.98	0.94	0.77	1.28	1.36	2.19	1.89	1.62	1.25	0.96	2	2.42	2.84	2.68	2.17	1.65	2.16	0.75	1.21	ATMG00860.1	3.92e-34	Uncharacterized mitochondrial protein AtMg00860 [Source:UniProtKB/Swiss-Prot;Acc:P92523]	YI31B_YEAST	7.46e-149
TRINITY_DN10868_c2_g1_i1.p1	0	0	0	0.21	0.35	0	0	0	0	0.29	0	0	0.94	0.16	0	0	0	0.33	0	0	0
TRINITY_DN10868_c2_g1_i7.p1	0	1.01	0.46	0	0.53	1.76	0	0	0.6	0	0	0	0.59	0	0	0	0	0	0	0.52	0
TRINITY_DN1086_c0_g1_i5.p1	4.49	1.39	7.46	3.25	17.48	22.9	11.08	21.82	10.76	5.64	2.91	26.61	26.2	24.9	32.33	14.4	18.12	23.31	47.94	46.46	43.61	AT3G16490.1	2.05e-49		IQD26_ARATH	2.02e-48
TRINITY_DN10872_c0_g1_i6.p1	88.99	86.23	96.03	73.07	87.39	93	94.2	110.91	94.78	119.25	120.01	94.64	119.17	106	92.89	83.44	79	83.77	77.82	71.74	62.8	AT1G08520.1	0	Magnesium-chelatase subunit ChlD, chloroplastic [Source:UniProtKB/Swiss-Prot;Acc:Q9SJE1]	CHLD_TOBAC	0
TRINITY_DN10877_c0_g1_i2.p1	1.01	0.47	1.3	0.61	2.96	2.18	0.54	3.33	1.12	0.79	0	2.22	0.55	0.45	2.99	0	0	0.91	0	0.49	0	AT3G60520.1	6.27e-17
TRINITY_DN10878_c0_g1_i1.p1	6.81	5.46	6.1	4.32	6.52	5.47	3.93	6.07	8.68	7.95	8.82	4.96	5.73	5.6	4.8	5.47	7.33	7.33	7.66	5.21	4.26	AT5G50420.1	0		OFT36_ARATH	0
TRINITY_DN108794_c1_g1_i1.p1	0	1.66	0	0	0	0	1.26	0	0.65	0	0	0	0	0	0	0	0	0	0	0	0
TRINITY_DN10879_c0_g1_i2.p1	0.29	0.64	1.5	0.17	1.38	0.88	0.73	1.19	1.25	2.34	1.66	2.4	2.07	0.62	2.62	1.57	2.97	4.19	4.05	2.51	1.29	AT1G47128.1	2.18e-152	Cysteine proteinase RD21A [Source:UniProtKB/Swiss-Prot;Acc:P43297]	RD21A_ARATH	2.14e-151
TRINITY_DN1087_c0_g1_i2.p1	1104.49	845.36	695.54	800.98	862.74	929.47	1026.01	714.38	539.11	697.49	625.89	729.86	639.63	697.89	508.24	522.8	556.5	654.66	517.93	737.56	881.92	AT2G36145.1	5.61e-49
TRINITY_DN1087_c0_g2_i2.p1	7.99	11.07	4.97	6.39	11.23	6.65	9.39	14.14	10.26	8.37	10.95	12.99	12.93	14.61	23.33	15.99	13.14	11.65	16.93	7.73	12.87	AT1G16290.2	1.9e-47
TRINITY_DN1087_c0_g2_i3.p1	23.61	20.16	17.58	17.36	21.81	20.73	23.17	28.2	26.26	23.35	24.02	26.11	27.07	30.04	38.46	29.98	30.5	26.34	34.42	27.05	25.78	AT1G79190.1	7.64e-172
TRINITY_DN1087_c0_g2_i3.p2	10.81	10.48	8.89	4.75	10.25	12.65	10.57	18.14	14.1	12.12	12.92	13.44	16.2	16.08	19.33	18.91	16.43	12.59	29	18.47	17.8	AT1G79190.2	2.24e-98
TRINITY_DN1087_c0_g2_i3.p3	10.82	12.63	11.12	8.47	18.21	13.32	12.64	22.97	16.93	14.76	11.6	17.05	25.92	23.26	32.66	20.49	19.7	21.48	32.88	30.21	24.59	AT1G79190.2	3.53e-28
TRINITY_DN1087_c2_g1_i1.p1	19.64	21.57	21.32	19.04	16.93	16.92	17.88	22.7	18.32	21.6	22	19.89	24.76	17.31	19.2	17.78	24.72	20.75	24.41	9.85	15.37	AT1G08190.1	2.42e-56	Vacuolar protein sorting-associated protein 41 homolog [Source:UniProtKB/Swiss-Prot;Acc:P93043]	VPS41_SOLLC	2.84e-64
TRINITY_DN10880_c0_g1_i2.p1	1.74	3.08	2.18	2.45	3.18	1.94	2.25	2.26	3.93	4.22	3.14	2.77	2.27	1.93	2.23	2.04	3.08	5.16	2.57	1.68	2.11	AT2G15730.1	0
TRINITY_DN10880_c0_g1_i4.p1	0	0	0	0.45	0	0	0	1.1	0	0	0	0	0	0.58	0	0	1	0	0	0	0	AT2G15730.1	0
TRINITY_DN10881_c0_g1_i7.p1	8.85	8.03	8.47	5.97	10.03	9.5	9.82	11.63	11.56	12.23	10.5	10.47	11.22	10.92	12.7	12.31	12.32	11.97	17.22	11.37	9.71	AT1G12470.1	0		VPS18_ARATH	0
TRINITY_DN108823_c0_g1_i1.p1	0	0	0	0	0	0	0	0	0.7	0	0	0	0	0	0	0	0	0	0	0	0	AT5G15100.1	2.87e-33	Auxin efflux carrier component 8 [Source:UniProtKB/Swiss-Prot;Acc:Q9LFP6]	PIN8_ARATH	2.82e-32
TRINITY_DN10882_c0_g1_i3.p1	13.78	13.32	15.93	16.23	14.05	17.32	15.83	13.47	22.93	15.01	13.96	19.87	13.59	18.57	14.08	22.21	24.29	22.89	22.62	23.87	20.96	AT3G24010.1	2.15e-93	PHD finger protein ING1 [Source:UniProtKB/Swiss-Prot;Acc:Q9LIQ6]	ING1_ARATH	2.12e-92
TRINITY_DN10882_c0_g2_i2.p1	1.06	0	0	2.58	0	2.31	2.28	0.5	0	0	0	0.47	0	0	0	0	2.63	0.48	0	0	0	AT2G33210.2	3.85e-91	Chaperonin CPN60-like 1, mitochondrial [Source:UniProtKB/Swiss-Prot;Acc:Q8L7B5]	CH60B_ARATH	4.1e-90
TRINITY_DN108845_c0_g1_i1.p1	0	0	0	0	0	0	0	0	0	0	0	0.38	0	0	0	0	0	0	0	0	0
TRINITY_DN108849_c0_g1_i1.p1	100.35	96.83	92.05	89.02	67.43	90.23	93.35	93.93	82.57	76.56	89.77	90.35	84.84	80.29	91.94	94.01	68.21	76.77	81.35	106	90.28	AT3G07480.1	4.83e-67		ADXH1_DROME	1.22e-08
TRINITY_DN10884_c0_g3_i1.p1	0.17	0	0.22	0.1	1.15	1.39	1.03	2.81	2.03	0.63	0.44	2.63	2.17	1.9	4.08	5.8	3.86	4.75	11.14	7.51	5.31	AT3G50700.1	9.31e-98	Protein indeterminate-domain 2 [Source:UniProtKB/Swiss-Prot;Acc:Q9SCQ6]	IDD2_ARATH	9.16e-97
TRINITY_DN108866_c0_g1_i1.p1	0.7	0	0.2	0	0	0	0	0	0.25	0	0	0	0	0	0	0	0	0	0	0	0	AT5G52290.1	3.03e-63		SHOC1_ARATH	2.98e-62
TRINITY_DN10886_c0_g1_i1.p1	54.4	41.8	62.66	62.21	41.87	35.72	32.83	47.57	43.32	62.07	72.91	59.15	52.1	45.79	23.79	21.69	29.06	28.8	19.27	19.22	12.79	AT2G22230.1	2.56e-108		FABZ_THEVB	2.18e-49
TRINITY_DN10887_c0_g1_i1.p1	0.46	1.63	0.2	0.4	0.22	1.53	1.29	0.95	0.5	0.94	1.08	1.07	0.59	0.2	1.4	1.03	0.79	1.68	3.56	1.45	1.55	AT2G39710.1	0		PCS1L_ARATH	1.87e-167
TRINITY_DN1088_c0_g1_i1.p1	0.41	0.75	0	0	1.19	1.3	1.29	0.76	1.34	0.64	0.91	3.63	1.31	1.08	4.86	5.01	0.8	2.22	4.44	11.05	6.64	AT1G10630.1	1.46e-125		ARF1_ARATH	1.21e-123
TRINITY_DN1088_c1_g1_i3.p1	0	0	1.17	0	0	1.63	0	0	0	0	1.48	0	2.9	0	0	0	0	1.25	0	1.21	0	AT3G62290.2	1.02e-111		ARF2_ORYSJ	3.49e-110
TRINITY_DN1088_c2_g1_i1.p1	792.12	781.18	796.25	720.27	715.53	673.44	708.55	663.17	671.48	697.01	603.85	656.93	518.28	648.52	711.71	765.2	837.88	780.86	715.59	982.92	1119.49	AT3G62290.2	4.43e-134		ARF1_ARATH	6.98e-133
TRINITY_DN1088_c3_g1_i2.p1	15.6	13.67	15.2	10.66	12.22	11.25	12.23	16.42	16.63	18.38	19.97	16.26	16.47	15.54	14.87	18.81	17.77	19.29	26.52	17.35	18.18	AT4G00740.2	0	Probable methyltransferase PMT13 [Source:UniProtKB/Swiss-Prot;Acc:Q93W95]	PMTD_ARATH	0
TRINITY_DN108905_c0_g1_i1.p1	0.28	0	0.24	0	0	0	0	0	0	0	0	0	0	0	0.28	0	0	0	0.5	0	0	AT2G18110.1	3.84e-82	Elongation factor 1-delta 2 [Source:UniProtKB/Swiss-Prot;Acc:Q9SI20]	EF1D1_ORYSJ	2.76e-112
TRINITY_DN10890_c0_g3_i1.p1	0	0.44	0	0	0	0	1	0.44	0	0	0	0	0	0	0	0	0.93	0	0	0	0.4
TRINITY_DN10891_c0_g1_i1.p1	10.7	12.54	30.97	29.74	16.56	14.08	15.26	22.43	40.29	19.95	36.51	27.48	29.14	22.71	23.42	24.93	22.05	21.9	14.25	16.01	18.89	AT3G23410.2	2.31e-120	Long-chain-alcohol oxidase FAO3 [Source:UniProtKB/Swiss-Prot;Acc:Q9LW56]	FAO1_LOTJA	2.79e-129
TRINITY_DN10894_c0_g1_i1.p1	2.66	2.4	2.09	1.28	2.17	2.44	0.87	4.28	4.16	5.8	5.14	5.12	4.39	3.25	5.7	5.3	6.01	6.56	7.3	4.34	5.34	AT4G04940.1	0		WDR36_HUMAN	1.15e-166
TRINITY_DN108952_c0_g1_i1.p1	0.82	0	0	0	0	0	0	0	0.9	0	0.45	0	0	0	0	0	0	0.37	0	0	0	AT5G03620.2	6.01e-33	Subtilisin-like protease SBT4.15 [Source:UniProtKB/Swiss-Prot;Acc:Q9LZS6]	CUCM1_CUCME	1.57e-35
TRINITY_DN10895_c0_g2_i1.p1	18.2	16.1	12.93	12.81	15.58	18.75	17.2	21.11	24.1	15.94	15.48	17.11	18.81	20.87	26.24	28.09	21.61	25.15	26.06	24.68	22.3	AT2G30350.2	2.76e-82		SLX1_MOUSE	3.51e-34
TRINITY_DN10896_c0_g1_i1.p1	55.9	49.18	32.59	29.65	61.44	69.29	49.15	45.94	36.57	40.43	51.66	46.6	56.96	40.93	33.25	21.19	26.68	29.22	45.62	43.14	45.56	AT3G19820.3	0	Delta(24)-sterol reductase [Source:UniProtKB/Swiss-Prot;Acc:Q39085]	DIM_PEA	0
TRINITY_DN108976_c0_g1_i1.p1	0	0	0	0	0	0	0	0	0	0	0	0	0	0	0	0	0	0	0	0	0	AT5G53170.1	1.61e-134	ATP-dependent zinc metalloprotease FTSH 11, chloroplastic/mitochondrial [Source:UniProtKB/Swiss-Prot;Acc:Q9FGM0]	FTSH9_ORYSJ	3.58e-139
TRINITY_DN10897_c0_g1_i10.p1	0.51	0.56	0.44	0	0.74	0.26	0.39	0.47	0.83	0.1	0.13	0.59	1.04	0.55	0.65	0.25	0.63	0.35	1.39	0.12	0.23	ATMG00710.1	2.6e-09	Uncharacterized mitochondrial protein AtMg00710 [Source:UniProtKB/Swiss-Prot;Acc:P92512]	POLX_TOBAC	5.25e-29
TRINITY_DN10897_c0_g1_i4.p1	0.82	0.76	0.86	1.44	0.92	0.63	0.63	1.47	0.8	1.19	0.39	1.14	1.14	2.23	1	1.83	0.85	0.45	0.9	0.24	0.66	AT4G23160.2	2.01e-114		POLR1_ARATH	2.7e-107
TRINITY_DN10897_c0_g1_i9.p1	0.55	0.84	0.2	0.28	0.28	0.24	1.44	1.08	0.25	0.56	0.25	1.29	0.24	1.02	1.65	1.17	0.69	0.43	0.21	0.23	0.21	AT4G23160.2	1.53e-43		POLR1_ARATH	4.15e-49
TRINITY_DN10897_c0_g2_i1.p1	0	0	0	1.54	1.24	1.39	2.05	5.4	0.7	0.97	0.74	2.19	0	1.15	2.48	0.67	1.87	1.14	4.02	0.61	0				POLX_TOBAC	1.65e-30
TRINITY_DN10897_c2_g1_i2.p1	0.88	0.5	0.33	0.36	0.18	0.19	0.38	0.4	0.07	0.05	0.06	0.35	0.57	0.11	0.83	0.43	0.56	0.34	0.97	0.18	0.51	AT4G23160.2	8.4e-117		POLR2_ARATH	2.57e-162
TRINITY_DN10898_c0_g1_i5.p1	0.92	0.57	0.42	0.35	0.13	0.4	0.79	0.84	0.47	0.39	0.36	0.49	0.53	0.63	0.31	0.47	0.43	0.76	0.32	0.17	0.12	AT1G04650.1	0
TRINITY_DN10899_c0_g2_i3.p1	17.43	22.57	19.98	18.95	18.41	21.58	18.01	22.19	13.35	19.18	18.48	18.3	19.97	22.57	17.74	23.85	21.16	25.7	25.67	34.49	39.31	AT5G63440.2	5.33e-155	UPF0235 protein At5g63440 [Source:UniProtKB/Swiss-Prot;Acc:Q8GWQ6]	Y6344_ARATH	5.24e-154
TRINITY_DN108_c0_g1_i3.p1	5.27	5.21	5.65	5.23	9.46	8.23	5.99	5.51	8.66	7.46	7.77	8.05	8.67	6.58	7.22	6.83	8.04	5.94	7.12	4.2	5.05	AT5G19010.1	0	Mitogen-activated protein kinase 16 [Source:UniProtKB/Swiss-Prot;Acc:Q8W4J2]	MPK16_ARATH	0
TRINITY_DN108_c0_g1_i5.p1	29.39	29.42	18.74	19.02	28.79	27.25	35.49	35.9	33	32.13	22.35	30.07	42.58	38.22	62.57	52.9	54.38	45.63	46.87	38.16	48.08	AT5G19010.1	0	Mitogen-activated protein kinase 16 [Source:UniProtKB/Swiss-Prot;Acc:Q8W4J2]	MPK16_ARATH	0
TRINITY_DN108_c1_g1_i2.p1	18.99	22.3	27.4	19.92	42.25	46.02	35.75	48.74	43.82	34.15	27.34	47.27	57.25	42.43	50.04	37.3	39.57	39.37	67.32	52.9	42.5	AT1G53510.1	1.07e-130	Mitogen-activated protein kinase 18 [Source:UniProtKB/Swiss-Prot;Acc:Q9C5C0]	MPK18_ARATH	1.06e-129
TRINITY_DN108_c1_g2_i1.p1	13.91	11.38	21.18	5.41	32.24	24.35	8.9	30.58	41.49	34.02	7.39	22.4	21.79	17.79	32.21	19.3	29.37	28.5	36.2	30.61	26.75	AT3G14720.2	4.12e-80	Mitogen-activated protein kinase 19 [Source:UniProtKB/Swiss-Prot;Acc:Q9LUC3]	MPK19_ARATH	2.33e-78
TRINITY_DN108_c1_g3_i1.p1	5.08	9.2	6.45	5.41	8.04	7.26	7.65	7.21	11.17	7.27	8.78	8	8.87	5.76	14.9	9.09	12.48	10.9	21.85	17.38	15.7	AT1G53510.1	0	Mitogen-activated protein kinase 18 [Source:UniProtKB/Swiss-Prot;Acc:Q9C5C0]	MPK18_ARATH	0
TRINITY_DN109005_c0_g1_i2.p1	0	0.18	0	0	0.65	0.28	0.14	0.75	0.29	0.17	0.49	0.38	0.14	0.23	0.14	0.13	0.33	0.37	0.37	0.13	0.12	AT1G70140.1	1.09e-138	Formin-like protein 8 [Source:UniProtKB/Swiss-Prot;Acc:O04532]	FH4_ARATH	2.17e-139
TRINITY_DN10902_c0_g1_i4.p1	0.59	1.34	0.77	0.35	0.57	1.86	0.92	0.28	1.62	1.42	0.64	0.81	0.62	0.26	3.56	2.69	4.08	1.34	1.61	0.57	1.81
TRINITY_DN10902_c0_g1_i5.p1	0.82	0	3.53	2.05	5.7	1.86	0.91	3.16	0.93	1.86	8.01	2.09	1.88	0.76	11.18	2.66	5.71	6.67	6.75	7.99	2.67
TRINITY_DN10902_c1_g1_i1.p1	0.4	1.26	0	0.49	0	0.7	0.83	0	0	0	0	1.14	1.07	0	2.05	0	0	0	0	0.21	0.18	AT5G66750.1	1.58e-150	ATP-dependent DNA helicase DDM1 [Source:UniProtKB/Swiss-Prot;Acc:Q9XFH4]	DDM1_ARATH	1.56e-149
TRINITY_DN10902_c1_g1_i2.p1	0.55	0.31	0.26	1.13	0	0	1.53	0.17	0.23	0.33	0.63	0.33	1.17	0	0.28	0.22	0.15	0.63	0.48	0.39	0.36	AT5G66750.1	8.54e-174	ATP-dependent DNA helicase DDM1 [Source:UniProtKB/Swiss-Prot;Acc:Q9XFH4]	DDM1_ARATH	8.4e-173
TRINITY_DN10902_c1_g1_i6.p1	1.44	0.89	1.63	0	1.26	1.45	0	2.24	2.77	0.63	0	0	0	1.87	0.52	1.23	1	0.58	1.38	0	0.67	AT5G66750.1	2.44e-121	ATP-dependent DNA helicase DDM1 [Source:UniProtKB/Swiss-Prot;Acc:Q9XFH4]	DDM1_ARATH	2.4e-120
TRINITY_DN109033_c0_g2_i2.p1	1.2	0.62	1.77	1.88	1.55	2.14	1.21	1.61	1.29	3.7	2.61	1.19	1.15	0.84	0.14	0.21	0.28	0	0.06	0	0	AT1G04110.1	0	Subtilisin-like protease SBT1.2 [Source:UniProtKB/Swiss-Prot;Acc:O64495]	SBT3_LOTJA	0
TRINITY_DN10906_c0_g1_i1.p1	3.93	5.26	2.96	2.21	2.56	2.59	3.22	3.02	6.44	5.27	5.15	3.41	5.45	5.33	2.95	3.14	3.98	2.54	3.09	1.59	2.84
TRINITY_DN109076_c0_g1_i1.p1	0	0	0	0	0	0	0	0	0	0	0	0	0	0	0	0	0	0	0	0	0	AT1G31460.1	1.74e-13
TRINITY_DN109089_c0_g2_i1.p1	0.34	0.45	0	0	0	0	0.35	0.16	0	0.14	0	0	0	0	0.34	0	0.5	0.15	0.15	0	0	AT1G14910.1	4.81e-24	Putative clathrin assembly protein At1g14910 [Source:UniProtKB/Swiss-Prot;Acc:P94017]	CAP9_ARATH	4.73e-23
TRINITY_DN10908_c0_g2_i3.p1	17.35	17.97	12.52	10.24	13.08	15.81	15.89	15.47	15.5	12.45	16.4	14	16.24	19.3	21.46	17.44	19.5	19.99	28.51	21.43	27.94	AT3G07950.1	6.51e-131	Rhomboid-like protein 19 [Source:UniProtKB/Swiss-Prot;Acc:Q8LF05]	RBL19_ARATH	6.41e-130
TRINITY_DN109090_c0_g1_i1.p1	0	0	0	0	0	0	0	0	0	0	0	0	0	0	0	0	0	0	0	0	0.39				ATRR_ASPOR	2.08e-07
TRINITY_DN1090_c0_g1_i6.p1	15.48	18.3	14	12.34	16.29	8.8	12.65	17.6	16.58	21.95	14.02	18.43	12.22	12.58	20.74	12.15	13.59	18.37	20.78	21.12	22.29	AT1G60080.1	5.8e-147		EXOS8_HUMAN	1.46e-60
TRINITY_DN1090_c0_g2_i2.p1	18.15	18.37	22.75	23.07	26.07	26.32	27.9	27.92	30.66	25.9	25.35	31.33	35.12	29.16	62.75	28.65	35.51	33.69	62.09	60.26	67.52
TRINITY_DN10910_c0_g1_i1.p1	343.58	378.64	424.77	397.83	395.53	380.16	368.96	405.11	376.56	479.07	506.09	452.86	430.04	413.88	382.11	370.53	401.7	432.81	373.81	447.56	428.12	AT4G24770.2	6.4e-100	31 kDa ribonucleoprotein, chloroplastic [Source:UniProtKB/Swiss-Prot;Acc:Q04836]	ROC3_NICSY	1.37e-109
TRINITY_DN10910_c0_g1_i2.p1	0	0	0	0	0	0	0	0	0	0	0	0	0	0	0	0	0	0	0	0	0	AT4G24770.2	2.49e-101	31 kDa ribonucleoprotein, chloroplastic [Source:UniProtKB/Swiss-Prot;Acc:Q04836]	ROC3_NICSY	5.87e-113
TRINITY_DN10910_c0_g1_i3.p1	552.36	539.14	629.74	573.35	511.7	478.52	456.15	505.82	460.11	641.71	638.14	564.22	508.37	544.61	572.25	512.47	562.27	589.39	487.41	631.95	614.79	AT4G24770.2	6.56e-95	31 kDa ribonucleoprotein, chloroplastic [Source:UniProtKB/Swiss-Prot;Acc:Q04836]	ROC3_NICSY	6.63e-103
TRINITY_DN10910_c1_g2_i1.p1	14.76	16.38	9.74	10.39	23.41	17.16	14.35	14.16	16.18	22.73	22.1	14.68	16.38	13.35	14.11	12.16	13.79	13.11	13.67	11.34	12.08	AT1G75710.1	1.14e-155
TRINITY_DN10911_c0_g1_i1.p1	1.47	5.02	3.8	0.87	6.05	1.55	3.84	3.08	5.63	5.23	4.85	6.25	4.69	4.21	9.5	8.23	8.68	5.98	9.65	8.52	8.23	AT1G71310.2	8.51e-82		RD521_ARATH	8.37e-81
TRINITY_DN109165_c0_g1_i1.p1	0	0.23	0.23	0	0.25	0	0.27	0.12	0.28	0.32	0	0	0.13	0.11	0.53	0	0	0.24	0	0	0.12
TRINITY_DN10916_c1_g1_i1.p1	5.33	9.88	8.04	6.78	8.01	4.92	7.6	6.53	10.79	9.44	12.7	7.31	8.38	8.45	11.66	8.85	7.17	10.28	10.37	13	14.11	AT3G06030.1	1.3e-14	Mitogen-activated protein kinase kinase kinase 3 [Source:UniProtKB/Swiss-Prot;Acc:O22042]	NPK1_TOBAC	2.38e-31
TRINITY_DN109177_c0_g1_i1.p1	0	0	0	0	0	0	0	0	0	0	0.45	0	0	0	0.81	0	0	0	0	0	0
TRINITY_DN10917_c0_g1_i1.p1	0.44	1.98	0.57	0	3.63	5.27	2.04	4.7	0.96	1.6	0	5.06	5.75	4.22	2	0.89	2.39	3.62	6.82	1.71	2.54	AT5G46330.2	9.14e-65	LRR receptor-like serine/threonine-protein kinase FLS2 [Source:UniProtKB/Swiss-Prot;Acc:Q9FL28]	FLS2_ARATH	8.99e-64
TRINITY_DN10918_c0_g1_i1.p1	1.75	1.06	2.52	1.38	2.54	3.06	1.82	1.08	1.27	3.27	3.16	1.59	2.76	2.81	2.05	1.18	2.59	3.88	2.12	0.56	1.02	AT5G58460.1	2.02e-49	Cation/H(+) antiporter 25 [Source:UniProtKB/Swiss-Prot;Acc:Q9FGH6]	CHX25_ARATH	1.99e-48
TRINITY_DN10919_c0_g2_i1.p1	6.83	7.99	11.05	10.82	12.86	9.62	8.55	12.97	13.4	30.31	28.03	12.67	14.72	11.61	2.13	0.74	1.95	0.9	1.24	1.68	4.44	AT1G06620.1	8.22e-109	1-aminocyclopropane-1-carboxylate oxidase homolog 1 [Source:UniProtKB/Swiss-Prot;Acc:Q84MB3]	ACCH1_ARATH	8.09e-108
TRINITY_DN1091_c0_g2_i1.p1	5.28	5.71	8.16	4.35	6.91	5.88	6.05	8.83	13.47	7.54	10.09	7.84	8.27	9.03	11	12.1	14.14	12.56	19.56	11.18	12.76	AT4G16430.1	1.26e-111	Transcription factor bHLH3 [Source:UniProtKB/Swiss-Prot;Acc:O23487]	MTB3_SOLLC	8.61e-159
TRINITY_DN1091_c1_g1_i1.p1	11.06	8.16	10.85	9.16	8.14	7.82	11.37	9.22	12.14	11.61	15.54	11.59	11.36	9.63	13.51	14.89	14.82	16.26	14.66	12.3	13.31	AT4G16430.1	3.61e-140	Transcription factor bHLH3 [Source:UniProtKB/Swiss-Prot;Acc:O23487]	MTB3_SOLLC	0
TRINITY_DN109216_c0_g1_i1.p1	1.04	0.48	0	0	0	0	0	0.98	0	0.4	0	0.45	1.13	0.47	0	0	0	0.94	0	0	0	AT1G43760.1	3.1e-09
TRINITY_DN10921_c0_g1_i2.p1	20.77	23.54	14.76	10.56	19.39	20.57	21.82	29.73	25.21	22.43	16.79	25.16	30.94	31.37	31.04	26.26	23.58	21.45	31.51	27.98	33.93	AT3G20290.3	0	EH domain-containing protein 1 [Source:UniProtKB/Swiss-Prot;Acc:Q94CF0]	EHD1_ARATH	0
TRINITY_DN109233_c0_g1_i1.p1	1.5	2.36	4.09	0	1.81	1.52	2.31	4.91	5.01	1.8	0	0.76	2.24	4.53	10.01	7.46	3.6	1.87	1.09	2.06	5.41	AT1G14780.1	0	MACPF domain-containing protein At1g14780 [Source:UniProtKB/Swiss-Prot;Acc:Q8L612]	MACP1_ARATH	0
TRINITY_DN109233_c0_g1_i2.p1	0	0.79	0.29	1.44	0	0	0	0.6	1	0.21	1.11	0.44	0	2.04	0.5	0.64	0.85	0	1.71	0	0	AT1G14780.1	0	MACPF domain-containing protein At1g14780 [Source:UniProtKB/Swiss-Prot;Acc:Q8L612]	MACP1_ARATH	0
TRINITY_DN109245_c0_g1_i2.p1	0.71	1.63	0	0	0.35	0.38	0.37	1	0.39	0.28	0.78	0.64	1.14	0.94	0.36	0.73	2.46	0.32	0.97	0	0.93	AT3G56830.1	1.86e-42		YC20L_ARATH	2.31e-30
TRINITY_DN10924_c0_g1_i2.p1	3.55	4.16	6.88	9.01	8.35	2.06	0.85	1.08	6.02	7.33	9.08	5.84	1.55	1.08	0.17	1.16	1.49	1.08	0	0	0	AT5G24910.1	0	Cytochrome P450 714A1 [Source:UniProtKB/Swiss-Prot;Acc:Q93Z79]	C14A1_ARATH	0
TRINITY_DN109270_c0_g1_i1.p1	0	0	0.59	0	0	0	0	0	0	0	0	0	0	0	0	0	0	0	0	0	0
TRINITY_DN109289_c0_g1_i1.p1	0	0	0	0	0	0	0	0	0	0	0	0	0	0	0	0	0	0	0	0	0
TRINITY_DN10928_c0_g2_i3.p1	101.4	99.58	89.92	79.92	100.83	103.58	105.18	124.27	110.89	100.05	112.38	133.32	106.34	105.67	130.26	128.06	120.68	129.06	117.47	144.26	158.98	AT5G65940.4	4.35e-84	3-hydroxyisobutyryl-CoA hydrolase 1 [Source:UniProtKB/Swiss-Prot;Acc:Q9LKJ1]	HIBC1_ARATH	4.28e-83
TRINITY_DN1092_c0_g1_i1.p1	2.02	1.86	1.32	1.58	1.73	1.93	1.7	3.24	2	1.97	2.24	1.69	2.71	2.33	2	2.2	1.87	2.34	3.71	2.27	1.53	AT4G33990.2	0	Pentatricopeptide repeat-containing protein At4g33990 [Source:UniProtKB/Swiss-Prot;Acc:O81767]	PP348_ARATH	0
TRINITY_DN1092_c0_g2_i1.p1	2.06	1.71	1.79	1.25	2.47	2.18	1.44	2.72	3.03	2.99	3.91	3.17	3.27	2.9	5.2	4.58	4.62	4.66	8.74	4.81	5.27	AT5G13680.1	0	Elongator complex protein 1 [Source:UniProtKB/Swiss-Prot;Acc:Q9FNA4]	ELP1_ARATH	0
TRINITY_DN10930_c0_g1_i1.p1	46.85	47.15	54.97	32.01	40.25	58.15	51.08	54.26	67.28	52.54	24.29	39	39.22	50.34	50.48	49.23	60.7	38.21	22.1	38.21	44.14	AT2G36895.2	1.38e-11
TRINITY_DN10931_c0_g1_i2.p1	0.93	0.86	2	4.47	3.62	2.99	1.48	2.61	0	2.91	1.57	3.29	0.5	2.49	0	0.48	2.29	2.52	2.11	1.35	1.58	AT4G16143.1	1.31e-12	Importin subunit alpha-2 [Source:UniProtKB/Swiss-Prot;Acc:F4JL11]	IMA1B_ORYSJ	9.88e-12
TRINITY_DN10931_c0_g2_i1.p1	0	0.13	0	0	0	0.15	0	0	0.16	0	0	0	0	0.13	0	0	0.14	0.27	0	0	0	AT1G32120.1	1.13e-07
TRINITY_DN10933_c0_g4_i1.p1	26.37	23.61	25.91	18.61	23.59	32.08	31.72	29.34	24.61	26.29	23.35	28.41	26.61	34.23	37.58	38.09	34.61	33.14	42.42	56.62	48.21	AT1G30540.1	3.92e-149		NAGK_DICDI	1.13e-52
TRINITY_DN10935_c0_g1_i1.p1	0	0.43	0.8	1.68	0.45	0.5	0	0.44	0	1.82	1.05	0	0	0	0	0	0	0.42	0	0	0	AT3G48270.1	3.33e-28	Cytochrome P450 71A26 [Source:UniProtKB/Swiss-Prot;Acc:Q9STK7]	C7317_PRUMU	1.08e-33
TRINITY_DN109360_c0_g1_i1.p1	0	0	0	0	0.6	0.22	0.21	0	0.23	0.17	0.22	0.19	0	0	0	0	0.41	0	2.08	0.2	0	AT2G06510.1	1.5e-10	Replication protein A 70 kDa DNA-binding subunit A [Source:UniProtKB/Swiss-Prot;Acc:Q9SKI4]	RFA1C_ORYSJ	2.32e-10
TRINITY_DN1093_c0_g2_i2.p1	7.75	11.45	6.58	3.24	3.96	4.41	6.54	5.67	6.92	4.17	5.63	4.69	6.97	9.14	6.22	10.74	8.33	9.68	7.88	6.85	5.06	AT5G24320.1	1.04e-119		YF48_SCHPO	1.46e-46
TRINITY_DN109400_c0_g1_i1.p1	0	0	0	0	0	0	0	0	1.09	0	0	0.43	0	0	7.79	0	0	0	0.45	0	0	AT4G37370.1	9.74e-55		CYQ32_CATRO	2.56e-65
TRINITY_DN109406_c0_g1_i1.p1	0.84	0.86	0.12	0.33	0.4	0	0.43	0	0.3	0.11	0	0	0	0.48	0	0	0.14	0	0	0	0	AT1G33811.1	3.01e-174	GDSL esterase/lipase At1g33811 [Source:UniProtKB/Swiss-Prot;Acc:Q8L5Z1]	GDL17_ARATH	2.96e-173
TRINITY_DN10940_c0_g2_i1.p1	7.21	10.59	7	4.92	7.1	4.71	4.99	8.77	7.13	7.42	8.28	5.43	7.94	7.52	5.3	6.81	5.71	7.82	8.31	7.25	6.92	AT1G11680.1	0	Sterol 14-demethylase [Source:UniProtKB/Swiss-Prot;Acc:Q9SAA9]	CP511_ARATH	0
TRINITY_DN10940_c1_g1_i1.p1	6.64	10.77	12.34	6.36	13.57	9.55	14.84	19.66	21.84	13.32	10.66	18.29	18.97	17.25	20.67	23.5	21.36	19.02	27.72	18.67	22.96	AT3G12480.1	1.53e-52		NC2A_RAT	4.22e-28
TRINITY_DN10943_c0_g2_i1.p1	21.95	20.91	23.87	13.35	19.72	22.87	21.44	26.65	26.79	26.35	26.64	21.89	32.09	30.19	43.51	36.47	35.72	33.35	46.54	43.37	49.68	AT1G22920.1	0	COP9 signalosome complex subunit 5b [Source:UniProtKB/Swiss-Prot;Acc:Q8LAZ7]	CSN5A_ARATH	0
TRINITY_DN10943_c1_g2_i4.p1	0.58	0	0	0	0	0	0	0	0	0	0.67	0	0	0	0	0.6	0	2.09	0	0	0
TRINITY_DN10944_c0_g1_i2.p1	3.23	5.58	5.43	4.16	3.59	4.88	4.67	6.09	5.88	3.44	4.11	6.1	8.57	4.54	11.82	10.8	9.5	8.02	12.45	7.22	10.26	AT3G61790.1	7.33e-163	E3 ubiquitin-protein ligase SINAT3 [Source:UniProtKB/Swiss-Prot;Acc:Q84JL3]	DIS1_ORYSJ	0
TRINITY_DN10944_c0_g1_i3.p2	0	0.27	0.26	0.35	0	0	1.23	0	0	0.71	0	0.27	0.31	0	0.59	0.3	0.58	0	2.15	0.29	0.78
TRINITY_DN10949_c1_g1_i10.p1	0	0	0	0	0	0	0	0.54	0.63	0	0.66	0.5	1.88	1.03	0.56	0.6	0	0	0	0.55	0
TRINITY_DN1094_c0_g1_i10.p1	49.77	44.5	36.99	34.81	36.57	39.14	37.26	44.68	40.29	47.08	50.07	50.36	49.93	51.78	67.59	62.17	50.98	49.42	48.19	64.68	81.73	AT5G11170.2	0	DEAD-box ATP-dependent RNA helicase 56 [Source:UniProtKB/Swiss-Prot;Acc:Q9LFN6]	RH56_ARATH	0
TRINITY_DN1094_c0_g1_i12.p1	21.8	19.28	18.2	14.63	15.09	18.85	20.97	23.66	19.92	22.06	16.91	23.62	24.84	25.14	34.31	29.34	29.22	22.12	31.31	28.55	34.71	AT5G11200.1	0	DEAD-box ATP-dependent RNA helicase 56 [Source:UniProtKB/Swiss-Prot;Acc:Q9LFN6]	RH56_ARATH	0
TRINITY_DN1094_c0_g1_i14.p2	36.84	37.62	21.8	14.72	18.93	30.45	26.06	33.16	35.54	26.08	22.46	20.43	40.1	32.25	56.3	46.26	37.59	26.15	39.51	32.15	40.74	AT5G11170.2	1.93e-94	DEAD-box ATP-dependent RNA helicase 56 [Source:UniProtKB/Swiss-Prot;Acc:Q9LFN6]	RH56_ARATH	3.84e-92
TRINITY_DN10952_c1_g2_i1.p1	1.02	0.95	0.44	0.62	0	0	1.09	1.45	0	0.4	0	0	0.56	0.46	0.51	1.06	1.01	0	0.46	0.5	0	AT4G23160.2	1.87e-41		POLR2_ARATH	1.69e-35
TRINITY_DN10954_c0_g1_i3.p1	27.32	25.5	26.21	22.23	18.97	18.21	19.64	43.04	31.36	32.27	38.4	34.53	24.11	33	39.36	42.58	39.41	38.91	34.82	38.63	59.72	AT3G09310.1	3.48e-47	UPF0161 protein At3g09310 [Source:UniProtKB/Swiss-Prot;Acc:Q9SR32]	U161_ARATH	3.42e-46
TRINITY_DN10954_c2_g1_i1.p1	2.35	2.36	1.34	0.92	1.87	1.72	1.41	2.42	2.69	0.95	1.13	1.13	2.33	2.05	3.36	3.43	3.24	2.83	4.26	3.77	2.77	AT2G37650.1	0	Scarecrow-like protein 9 [Source:UniProtKB/Swiss-Prot;Acc:O80933]	SCL9_ARATH	0
TRINITY_DN10955_c0_g2_i1.p1	3.4	3.94	3.87	3.82	4.12	3.42	3.71	4.24	4.3	5.94	6.64	5.5	4	3.22	3.68	4.55	5.74	6.78	6.35	2.87	2.3	AT4G13650.1	0	Pentatricopeptide repeat-containing protein At4g13650 [Source:UniProtKB/Swiss-Prot;Acc:Q9SVP7]	PP307_ARATH	0
TRINITY_DN10955_c0_g3_i1.p1	0.62	0.45	0.13	0.3	0.1	0.26	0.1	0.57	0.11	0.38	0.58	0.15	0.58	0.44	0.53	0.3	0.41	0.61	0.37	0.15	0.14	AT1G04110.1	0	Subtilisin-like protease SBT1.2 [Source:UniProtKB/Swiss-Prot;Acc:O64495]	SBT_MEDTR	0
TRINITY_DN10956_c0_g1_i10.p1	6.79	5.24	3.64	2.48	4.52	5.34	5.54	9.3	5.86	2.26	5.25	1.92	3.66	4.88	4.94	6.8	4.37	7.02	8.28	4.53	2.88	ATMG01250.1	3.59e-16	Uncharacterized mitochondrial protein AtMg01250 [Source:UniProtKB/Swiss-Prot;Acc:P92555]	LORF2_HUMAN	1.59e-20
TRINITY_DN10956_c0_g1_i4.p1	8.73	6.01	3.94	2.77	4.77	7.16	8.5	8.95	6.26	6.33	4.2	5.8	5.75	6.86	6.79	8.9	6.23	6.98	7.36	6.71	6.49	AT3G25270.1	1.46e-06		RNHX1_ARATH	4.48e-11
TRINITY_DN109581_c0_g1_i1.p1	2.11	1.28	2.72	4.17	6.12	4.44	0.73	2.29	2.3	5.57	5.39	1.89	2.98	0.93	0	0	0	0	0	0	0	AT5G26330.1	5.08e-52		MAVI_CUCPE	5.7e-35
TRINITY_DN10958_c0_g1_i1.p1	0	0	0	0	0	0	0	0	0	0	0	0	0	0	1.24	0	0.27	0	2.34	0	5.1	AT3G03080.1	2.71e-80		RED1_COCH4	3.09e-148
TRINITY_DN10958_c0_g3_i1.p1	0	0	0	0	0	0	0	0	0	0	0	0	0	0	0.74	0	0.49	0	0.22	0	2.17	AT1G65560.1	1.33e-55		RED1_COCH4	1.94e-96
TRINITY_DN10959_c0_g1_i1.p1	1.54	7.15	4.84	2.47	4	3.87	6.55	4.34	2.83	6.78	3.5	4.94	4.47	5.05	2.02	2.12	7.58	8.79	12.55	7.93	6.05
TRINITY_DN10959_c1_g1_i4.p1	1.07	0.82	0.55	0.91	0.79	0.7	0.92	0.97	1.5	1.2	1.21	1.12	1.44	1.22	1.3	1.07	1.13	1.14	2.15	0.53	0.86	AT3G57060.1	0		CNDD2_ARATH	0
TRINITY_DN10960_c0_g1_i11.p1	0	0.47	0	0	0	0	0	0	0.29	0	0	0	0	0.23	0	0	0	0	0	0	0
TRINITY_DN10961_c0_g1_i2.p1	21.26	15.01	27.24	21.47	28.13	14.43	19.17	17.13	22.19	36.62	26.85	35.29	17.15	18.63	92.5	31	55.08	30.33	51.03	82.53	114.97	AT5G67420.1	4.23e-62	LOB domain-containing protein 37 [Source:UniProtKB/Swiss-Prot;Acc:Q9FN11]	LBD37_ARATH	4.17e-61
TRINITY_DN10962_c0_g4_i1.p1	7.04	8.99	9.5	6.42	4.86	7.81	6.54	9.79	10.63	9.74	7.67	8.49	9.36	11.4	13.42	12.3	10.96	15.04	10.54	14.51	15.71	AT3G12570.4	0
TRINITY_DN109631_c0_g1_i2.p2	0	0	0	0	0	0	0	0	0	0	0	0	0	0	0	0	0	0	1.03	0	0.32	AT4G21580.2	3.54e-18		YGD6_SCHPO	9.4e-34
TRINITY_DN10963_c0_g1_i3.p1	7.75	8.11	3.06	2.86	3.2	3.89	4.77	3.68	4.33	3.56	4.95	4.66	4.37	4.03	6.23	4.65	5.44	5.22	6.42	4.06	2.73	AT2G14860.1	8.92e-93		PX24D_DICDI	1.8e-27
TRINITY_DN109677_c0_g1_i1.p1	0	0	0	0	0	0	0	0	0	0	0	0	0	0	0	0	0	0	0	0	0	AT5G54500.1	6.41e-110	NAD(P)H dehydrogenase (quinone) FQR1 [Source:UniProtKB/Swiss-Prot;Acc:Q9LSQ5]	FQR1_ARATH	6.3e-109
TRINITY_DN10967_c0_g1_i4.p1	19.28	15.47	23.18	20.35	22.24	15.48	16.24	21.74	19.06	22.41	19.04	21.8	15.88	17.2	26.39	24.99	28.65	29.71	30.67	24.62	21.76	AT4G29960.1	2.04e-22
TRINITY_DN10967_c0_g2_i1.p1	12.31	9.01	7.15	2.89	3.88	2.08	4.14	7.43	8.02	6.12	6.67	7.37	8.37	4.66	6.07	9.63	6.82	6.09	7.7	2.59	7.49	AT2G29570.1	2.9e-164	Proliferating cell nuclear antigen 2 [Source:UniProtKB/Swiss-Prot;Acc:Q9ZW35]	PCNA_TOBAC	3.88e-174
TRINITY_DN10968_c0_g1_i13.p1	6.22	4.73	3.54	4	6.09	4.84	5.53	5.55	6.18	5.23	6.18	5.89	6.24	5.26	8.36	8.89	9.27	8.74	9.8	6.29	5.64	AT5G22030.1	0	Ubiquitin carboxyl-terminal hydrolase 8 [Source:UniProtKB/Swiss-Prot;Acc:Q9C585]	UBP8_ARATH	0
TRINITY_DN10969_c1_g2_i1.p1	40.72	30.25	50.92	31.33	31.95	38.68	34.04	39.63	44.96	53.74	43.11	38.67	39.31	40.73	55.7	53.65	52.49	62.23	60.88	49.24	41.97	AT5G49740.2	1.9e-66	Ferric reduction oxidase 7, chloroplastic [Source:UniProtKB/Swiss-Prot;Acc:Q3KTM0]	FRO7_ARATH	1.11e-63
TRINITY_DN1096_c0_g1_i1.p1	1.65	1.57	2.66	2.43	1.71	1.82	2.53	2.17	3	2.08	2.58	2.26	1.84	2.46	0.94	2.27	2.72	2.96	2.33	2.38	1.78	AT5G37060.1	0	Cation/H(+) antiporter 24 [Source:UniProtKB/Swiss-Prot;Acc:Q1HDT2]	CHX24_ARATH	0
TRINITY_DN1096_c0_g1_i2.p2	0.96	0.86	3.73	2.54	3.7	1.99	0.99	3.77	2.87	2.89	1.79	2.19	3.25	2.29	0.96	2.89	3.06	3.48	2.82	0.7	1.48	AT5G58460.1	1.04e-53	Cation/H(+) antiporter 25 [Source:UniProtKB/Swiss-Prot;Acc:Q9FGH6]	CHX25_ARATH	1.02e-52
TRINITY_DN1096_c0_g1_i6.p1	2.17	2.25	1.84	1.46	1.67	2.11	2.59	2.54	2.41	1.28	1.48	1.86	1.8	3.35	3.3	3.42	4.01	5.47	2.61	2.13	1.8	AT5G37060.1	0	Cation/H(+) antiporter 24 [Source:UniProtKB/Swiss-Prot;Acc:Q1HDT2]	CHX24_ARATH	0
TRINITY_DN1096_c0_g1_i6.p3	0.53	0.98	3.99	3.81	1.54	2.85	1.12	1.85	1.53	4.33	3.6	2.06	1.72	0.94	0.52	2.18	3.11	3.8	1.91	3.56	1.33	AT5G37060.1	1.31e-39	Cation/H(+) antiporter 24 [Source:UniProtKB/Swiss-Prot;Acc:Q1HDT2]	CHX24_ARATH	1.29e-38
TRINITY_DN1096_c0_g1_i7.p2	1.22	0	1.76	0.49	0.4	1.3	1.29	0.38	2.24	0.96	1.81	1.09	0.87	1.45	1.62	1.25	1.21	0.37	2.59	0	1.75	AT5G58460.1	5.47e-27	Cation/H(+) antiporter 25 [Source:UniProtKB/Swiss-Prot;Acc:Q9FGH6]	CHX25_ARATH	5.38e-26
TRINITY_DN109720_c0_g1_i1.p1	0.42	0	0	0.5	0	0.44	0	0	0	0.66	0	0	0	0	0	0	0	0.38	0	0	0
TRINITY_DN109723_c0_g1_i1.p1	0	0	0	0	0	0	0.65	0	1.34	0.47	0	0	1.34	1.09	0	0.63	0	0	3.29	0	0	AT4G23160.2	1.15e-43		POLR1_ARATH	1.77e-56
TRINITY_DN109729_c0_g1_i1.p1	0	1.01	0	0	1.08	0	0	0	0	0	0	0	0	0	0.37	0.38	0	0.34	0.34	0.36	0
TRINITY_DN10972_c0_g1_i5.p1	0.46	1.72	1.2	0.56	1.81	0.5	0.98	1.74	0	1.82	0.52	1.23	2.01	0.41	0.92	2.4	1.83	0	0.84	1.8	0.79
TRINITY_DN10973_c0_g1_i3.p2	0.33	0	0	0.39	0	0	0.34	0.3	0.36	1.04	0.36	0	0	0.29	1.31	1	0.97	0	1.49	0	0.85
TRINITY_DN10973_c4_g1_i1.p1	1.5	0.93	0.43	0	0	0	0	0	0.55	0	0	0	1.09	0	0	0.52	0	0	0.91	0	0
TRINITY_DN109744_c0_g1_i1.p2	0	0	0	0	0	0	0	0	0	0	0	0	0	0	0	0	0	0	0	0	1.98
TRINITY_DN10974_c0_g1_i1.p1	15.31	22.7	32.97	21.9	21.91	16.34	14.8	19.5	21.97	22.75	34.65	22.3	15.54	18.5	8.86	14.84	7.97	10.77	9.65	9.46	9.09	AT2G03350.1	1.19e-94		Y5161_ARATH	5.95e-57
TRINITY_DN10975_c0_g2_i10.p1	239.31	259.67	270.41	202.77	204.22	218.97	245.26	213.5	195.09	219.46	216.15	202.96	212.03	222.37	250.25	232.53	235.54	255.79	176.3	195.17	197.25	AT5G38660.1	1.56e-104		Y575_SYNY3	1.32e-23
TRINITY_DN109773_c0_g2_i1.p1	0	0	0	0	0	0	0.43	0.39	0	0	0	0	0	0	0	0	0	0.75	0	0	0	AT2G01050.1	5.29e-11
TRINITY_DN10977_c0_g1_i1.p1	161.86	178.32	182.47	161.9	144.63	115.39	135.73	119.77	104.08	142.24	129.01	121.32	126.85	136.16	68.55	123.41	123.97	122.22	91.11	136.79	101.84	AT1G45230.1	2.42e-62		DCL_SOLLC	4.3e-69
TRINITY_DN10977_c0_g2_i1.p1	258.62	245.67	220.78	198.99	196.86	183.34	184.97	156.36	154.17	192.52	203.02	204.4	191.56	169.53	157.83	137.53	166.26	223.28	163.03	196.95	146.88	AT1G45230.1	1.96e-64		DCL_SOLLC	2.35e-70
TRINITY_DN10978_c0_g3_i2.p1	0	0	0	0	0.35	0	0	0	0	0	0	0	0	0	0	0	0	0	1.65	0.35	0.31
TRINITY_DN1097_c0_g1_i1.p1	164.92	48.72	5.35	1.43	0.59	13.72	135.04	97.68	62.23	3.03	1.01	0.38	18.57	123.42	118.61	104.76	9.41	1.31	0.56	13.24	76.14	AT5G64170.3	1.96e-27	Protein LNK1 [Source:UniProtKB/Swiss-Prot;Acc:A8MQN2]	LNK1_ARATH	2.49e-25
TRINITY_DN1097_c0_g1_i5.p1	0.89	0	0.38	0	0.43	0.48	0.94	0	0.98	0.35	0.5	0.39	0.48	0	0.88	0.46	0.44	0.4	2.02	0	0.76	AT4G24740.4	1.03e-68	Serine/threonine-protein kinase AFC2 [Source:UniProtKB/Swiss-Prot;Acc:P51567]	AFC2_ARATH	1.72e-66
TRINITY_DN1097_c0_g2_i1.p1	113.07	102.53	102.43	86.72	80.56	77.45	71.17	95.24	104.59	117.47	119.87	102.43	110.59	105.93	140.58	112.82	118.04	112.12	125.41	116.63	115.31	AT1G30580.1	0	Obg-like ATPase 1 [Source:UniProtKB/Swiss-Prot;Acc:Q9SA73]	OLA1_ARATH	0
TRINITY_DN1097_c0_g3_i1.p1	6.01	2.75	2.52	2.34	3.15	3	5.39	5.03	5.13	5.89	2.31	4.36	4.51	6.76	12.48	6.16	6.26	4.8	8.74	4.4	3.07	AT1G50030.1	9.82e-159	Serine/threonine-protein kinase TOR [Source:UniProtKB/Swiss-Prot;Acc:Q9FR53]	TOR_ARATH	9.66e-158
TRINITY_DN109833_c0_g1_i1.p1	0.6	0	0	0	0	0	0	0	0	0	0	0	0	0	0	0.63	0	0	0	0.58	0
TRINITY_DN109837_c0_g1_i1.p2	0	0	0	0	0	0	0	0	0	0	0	0	0	0	0.66	0	0	0	0	0	1.14	AT5G35530.1	1.71e-87	40S ribosomal protein S3-3 [Source:UniProtKB/Swiss-Prot;Acc:Q9FJA6]	RS3_SCHPO	6.37e-90
TRINITY_DN10983_c0_g3_i1.p1	2.26	4.43	1.24	0.83	1.28	0.94	1.77	2.54	1.55	0.67	0.64	0.96	1.89	2.55	3.44	3.85	1.92	0.84	1.95	2.88	2.68	AT5G46330.2	2.32e-136	LRR receptor-like serine/threonine-protein kinase FLS2 [Source:UniProtKB/Swiss-Prot;Acc:Q9FL28]	FLS2_ORYSJ	5.41e-145
TRINITY_DN10984_c0_g1_i1.p1	7.71	6.06	6.9	4.57	5.71	3.73	6.16	7.47	5.99	5.72	4.45	4.6	5.56	7.67	6.64	8.39	9.15	5.71	5.6	5.46	7.26	AT1G12580.1	0		CDPKH_ORYSJ	5.53e-93
TRINITY_DN10985_c0_g1_i5.p1	1.21	0.77	0.9	0.2	0	0.36	0.18	0.8	0.19	1.12	0.18	0.16	0.18	0.45	0.87	0.69	0.85	0	0.63	0	0	AT4G23160.2	2.56e-81		POLR1_ARATH	6.77e-77
TRINITY_DN10985_c0_g3_i1.p1	0	0	0	0	0	0.33	0.16	0.15	0	0	0	0	0.33	0.14	0.32	0.32	0.63	0.15	0	0.15	0.57	AT4G23160.2	2.84e-121		POLR1_ARATH	5.53e-99
TRINITY_DN10988_c0_g1_i2.p1	8.21	8.5	6.84	5.06	10.87	10.68	7.88	7.14	8.06	9.49	10.22	7.81	14.28	9.41	5.45	4.07	5.63	5	7.3	6.42	5.36	AT5G13260.1	2.02e-176		SCD2_ARATH	6.5e-165
TRINITY_DN10988_c0_g1_i5.p1	0	0	1.2	0	0.66	0	0	0	0.52	1.66	1.24	3.32	0	0	1.22	0	1.28	0.59	0.93	0	0	AT5G13260.1	6.4e-48		SCD2_ARATH	3.07e-40
TRINITY_DN10988_c0_g3_i1.p1	6.03	6.49	9.03	6.69	4.39	4.08	6.12	12.06	10.71	10.59	8.23	6.61	8.85	11.25	12.31	16.14	13.01	12.3	6.6	7.75	7.63	AT5G13270.1	0	Pentatricopeptide repeat-containing protein At5g13270, chloroplastic [Source:UniProtKB/Swiss-Prot;Acc:Q9LYU9]	PP378_ARATH	0
TRINITY_DN1098_c0_g1_i2.p1	104.64	78.19	78.86	52.24	88.51	76.71	73.88	90.5	69.22	98.84	115.57	98.61	100.43	107.63	107.86	105.56	115.02	87.67	97.97	123.7	147.33	AT2G39390.1	5.47e-73	60S ribosomal protein L35-2 [Source:UniProtKB/Swiss-Prot;Acc:O80626]	RL35_EUPES	1.2e-73
TRINITY_DN109922_c0_g2_i1.p1	0	1	3.88	0.22	5.4	13.68	7.27	8.45	10.35	2.27	2.57	18.76	17.41	13.27	25.47	19.02	10.85	29.08	60.19	34.73	49.28	AT5G12010.1	8.02e-164		ALPL_ARATH	6.81e-32
TRINITY_DN10992_c0_g1_i1.p1	0	0	0	0	0.23	0.12	0.25	0	0.26	0.4	0	0.11	0	0.1	37.48	0.12	0.36	0.33	1.54	0.35	1.53	AT2G26560.1	9.57e-162	Patatin-like protein 2 [Source:UniProtKB/Swiss-Prot;Acc:O48723]	PLP2_ARATH	9.41e-161
TRINITY_DN10993_c0_g2_i2.p1	0.79	3.17	0	0.46	0.87	1.24	1.67	1.22	0.67	1.69	3.01	1.75	2.24	2.42	2.94	0.43	1.32	1.46	1.53	2.6	2.76	AT5G37530.1	1.29e-41		TCD_SCHPO	8.55e-14
TRINITY_DN10993_c0_g3_i1.p1	181.88	179.95	159.94	108.51	190.75	229.33	233.02	267.55	267.03	151.26	152.22	207.65	203.93	243.08	432.97	417.5	424.3	379.73	527.14	628.59	783.54	AT4G02080.1	1.9e-116	GTP-binding protein SAR1A [Source:UniProtKB/Swiss-Prot;Acc:O04834]	SAR1A_ARATH	1.87e-115
TRINITY_DN10994_c0_g5_i1.p1	19.36	19.72	22.4	28.1	22.82	26.78	29.52	25.55	27.71	20.46	23.01	25.92	22.2	26.71	27.01	24.59	31.58	30.3	33.08	28.63	36.06	AT5G53800.1	7.76e-67
TRINITY_DN10995_c0_g1_i1.p1	7.18	9.22	4.85	2.39	2.19	4.23	6.61	9.49	9.48	5.67	4.63	3.98	6.49	13.3	17.2	19.62	13.76	9.36	11.96	6.31	7.14	AT4G29900.1	0	Calcium-transporting ATPase 10, plasma membrane-type [Source:UniProtKB/Swiss-Prot;Acc:Q9SZR1]	ACA10_ARATH	0
TRINITY_DN10995_c1_g3_i3.p1	30.95	33.62	19.8	9.99	15.89	22.23	29.02	45.76	22.12	28.55	22.25	16.2	33.69	46.1	34.43	26.3	28.3	20.77	31.36	24.63	22.83	AT5G57110.2	8.08e-115	Calcium-transporting ATPase 8, plasma membrane-type [Source:UniProtKB/Swiss-Prot;Acc:Q9LF79]	ACA5_ORYSJ	6.22e-120
TRINITY_DN10996_c0_g2_i2.p1	7.02	4.99	1.67	2.88	6.22	6.89	10.49	6.7	3.13	3.81	2.44	3.57	6.49	5.8	2.92	1.77	0.81	2.38	1.99	1.2	2.58	AT3G52110.2	2.05e-57
TRINITY_DN1099_c0_g1_i14.p1	25.05	25.56	15.28	9.27	32.83	54.12	37.75	57.37	59.75	22.37	24.82	64.86	66.39	64.14	83.65	74.19	50.33	78.76	147.4	119.71	124.16	AT3G19970.2	3.46e-128		TMM53_DANRE	1.56e-09
TRINITY_DN109_c0_g1_i1.p1	5.5	4.8	3.59	2.67	4.97	4.09	4.47	5.14	4.6	4.45	6.34	5.54	5.87	4.98	5.82	4.96	5.1	5.17	9.21	5.74	5.35	AT3G08960.3	0		IPO11_HUMAN	5.25e-109
TRINITY_DN109_c0_g2_i1.p1	9.56	17.11	11.01	5.48	5	7.23	12.65	13.72	26.87	9.64	9.17	13.76	9.32	18.94	67.32	67.3	56.8	41.44	45.24	50.86	53.65	AT3G46540.1	5.7e-76		ENT3_YEAST	5e-13
TRINITY_DN10_c0_g1_i1.p1	6.23	5.53	1.05	4.68	6.72	3.36	11.26	12.4	5.61	8.5	9.54	7.12	6.8	13.33	11.35	13.15	14.11	11.24	13.05	13.06	7.65	AT3G02800.1	1.2e-29		DSP3_ARATH	1.18e-28
TRINITY_DN10_c0_g1_i5.p1	4.02	3.84	9.36	11.17	25.88	25.72	18.03	19.13	15.49	15.08	14.33	25.5	25.87	12.82	24.74	16.04	16.59	21.72	42.61	55.08	49.32	AT3G02800.1	4.69e-90		DSP3_ARATH	4.61e-89
TRINITY_DN11000_c0_g1_i5.p1	4.2	2.73	1.56	1.15	2.44	2.23	3.1	3.33	2.59	2.07	2.03	2.23	3.32	3.39	6.71	3.9	3.72	3.1	6.27	2.82	2.65	AT5G24740.2	0		VP13A_DICDI	3.72e-50
TRINITY_DN110036_c0_g1_i2.p1	0.89	1.26	1.01	1.27	1.91	1.53	0.55	1.26	2.44	1.24	0.71	1.16	1.46	0.76	0.7	0.61	0.94	0.81	0.75	0.2	0.37	AT4G30870.1	0	Crossover junction endonuclease MUS81 [Source:UniProtKB/Swiss-Prot;Acc:Q5W9E7]	MUS81_ARATH	0
TRINITY_DN110045_c1_g1_i3.p1	0	0	0	0	0	0	0	0	0	0.42	0	0	1.2	0	0	0	1.08	0.49	0	0	0
TRINITY_DN11007_c0_g1_i2.p1	1.63	0.32	0.47	0	2.09	1.12	0.56	1.33	2.16	0.73	0.96	2.17	0.94	0.78	6.94	5.95	4.99	4.94	6.24	8.23	10.45	AT5G28150.1	3.84e-89
TRINITY_DN110096_c0_g1_i1.p1	0	0	0	0	0	0	0	0	0	0	0	0	0	0	0	0	0	0	0.36	0	0.34				SYA_EMENI	1.89e-29
TRINITY_DN11009_c0_g1_i3.p1	0.6	0	1.55	0.35	0.29	0	0.31	0	0.65	0.24	0.32	0	0.31	0.26	0.3	2.11	0.29	0.54	0.27	0.29	0	ATMG00300.1	7.07e-09	Uncharacterized mitochondrial protein AtMg00300 [Source:UniProtKB/Swiss-Prot;Acc:P93293]	POLX_TOBAC	1.71e-48
TRINITY_DN11009_c0_g3_i2.p1	0.15	0.13	0.21	0.06	0.38	0.4	0.25	0.18	0.16	0.49	0.46	0.28	0.25	0.21	0.2	0.19	0.15	0.36	0.22	0.19	0	AT4G15090.1	9.54e-19	Protein FAR-RED IMPAIRED RESPONSE 1 [Source:UniProtKB/Swiss-Prot;Acc:Q9SWG3]	CHEA_CHAGB	4.23e-19
TRINITY_DN1100_c0_g1_i12.p1	20.09	19.95	13.34	13.61	17.34	14.11	13.05	20.45	17.55	17.45	19.55	17.91	12.4	14.31	16.08	21.07	21.96	17.99	21.53	20.3	25.21	AT1G60640.3	5.95e-07
TRINITY_DN1100_c0_g1_i6.p1	1.76	1.84	1.54	2.33	3.73	0.92	1.82	3.24	0.95	0.71	1.27	2.66	4.14	2.75	5.14	3.83	2.35	1.31	4.48	1.93	2.39	AT1G76400.2	1.1e-06	Dolichyl-diphosphooligosaccharide--protein glycosyltransferase subunit 1A [Source:UniProtKB/Swiss-Prot;Acc:Q9SFX3]	OST1A_ORYSJ	7.42e-06
TRINITY_DN110102_c0_g1_i1.p1	0	0	0	0	0	0	0	0	0	0	0.47	0	0	0	0	0	0	0	0	0	0.36	AT1G50840.1	3.52e-83	DNA polymerase I A, chloroplastic/mitochondrial [Source:UniProtKB/Swiss-Prot;Acc:F4I6M1]	POLIA_ORYSJ	1.46e-102
TRINITY_DN110118_c0_g1_i1.p1	0	0	0	0	0	0	0	0	0	0	0	0	0	0	0.57	0	1.14	0	0	0	0.48	ATMG01190.1	5.32e-46		ATPA_NEUCR	1.33e-90
TRINITY_DN11011_c0_g1_i3.p1	0	0	0	0.51	0	0	0	0	0	0	0	0.76	1.37	0	0.42	0	0	0.77	0.77	0	0.73				POLX_TOBAC	4.24e-33
TRINITY_DN11012_c0_g1_i1.p1	4.81	8.23	4.46	5.41	4.8	4.94	3.82	5.41	6.95	5.48	7.69	4.75	3.67	6.3	4.31	5.67	6.82	6.96	6.13	3.96	3	AT1G14140.1	1.52e-141	Mitochondrial uncoupling protein 3 [Source:UniProtKB/Swiss-Prot;Acc:Q9XI74]	PUMP3_ARATH	1.5e-140
TRINITY_DN110142_c0_g1_i1.p1	0	0	0	0	0.28	0	0	0	0	0.47	0	0	0	0	0.59	0	0	0	0	0	0
TRINITY_DN11014_c1_g1_i1.p1	0.08	0.07	0.07	0	0.08	0.57	0.24	0.07	0.26	0	0.08	0.08	0.49	0.14	0.41	0.32	0.08	0.07	0.36	0.16	0.36	AT4G17380.1	2.9e-12	DNA mismatch repair protein MSH4 [Source:UniProtKB/Swiss-Prot;Acc:F4JP48]	MSH4_ARATH	2.85e-11
TRINITY_DN11015_c0_g1_i2.p1	19.39	8.59	12.61	13.34	15.8	15.18	17.13	27.71	22.2	26.67	23.48	23.17	18.41	17.54	30.58	28.58	28.48	31.31	35.83	34.08	40.22	AT5G41960.1	2.54e-46
TRINITY_DN11016_c0_g2_i1.p1	22.18	21.48	8.43	9.17	25.78	31.1	33.35	58.83	33.06	41.18	20.49	38.5	47.62	39.59	61.06	34.11	36.19	38.03	59.02	42.85	52.77	AT2G15320.1	5.04e-109		PGIP1_ORYSJ	7.65e-14
TRINITY_DN110184_c1_g1_i1.p1	0	0	1.8	0.86	1.37	0	0.76	1.33	0	0.53	1.65	0.6	0	1.27	0.68	2.96	0.69	0.63	5.71	0	0
TRINITY_DN11018_c0_g1_i3.p1	16.19	13.32	13.41	14.4	26.26	21.57	13.54	9.77	12.17	16.63	19.27	15.99	16.28	9.26	9.69	6	13.56	17.1	38.7	20.43	11.5	AT2G37080.3	9.41e-126	Interactor of constitutive active ROPs 2, chloroplastic [Source:UniProtKB/Swiss-Prot;Acc:Q9ZQC5]	ICR2_ARATH	1.08e-122
TRINITY_DN1101_c0_g1_i2.p1	117.6	109.17	114.68	82.77	76.91	93.62	74.43	114.56	113.32	106.16	110.58	141.37	110.72	117.86	126.43	121.19	125.48	120.45	123	135.52	182.01	AT2G09990.1	5.28e-90	40S ribosomal protein S16-1 [Source:UniProtKB/Swiss-Prot;Acc:Q9SK22]	RS16_FRIAG	9.58e-92
TRINITY_DN11020_c0_g2_i1.p1	0.69	3.7	1.04	0.64	0.66	1.24	0.7	0.88	1.12	1.12	0.73	0.64	1.78	0.74	1.22	0.69	0.7	1.57	3.42	2.34	0.77
TRINITY_DN11020_c0_g2_i4.p1	0	1.32	0	1.1	0	0	0	0.67	0	0	0	0	0	0	0	0	1.39	0.45	0.5	0.48	0.42
TRINITY_DN110228_c0_g1_i1.p1	0	0	0	0	0.14	0	0.15	0	0	0	0	0	0	0.25	0	0.15	0	0	0.13	0	0.39	AT1G59900.2	0	Pyruvate dehydrogenase E1 component subunit alpha-1, mitochondrial [Source:UniProtKB/Swiss-Prot;Acc:P52901]	ODPA1_ORYSJ	0
TRINITY_DN11022_c1_g1_i1.p1	3.26	2.41	0	0	0.57	1.24	2.77	1.1	0.97	0.24	0.32	0.27	0	1.82	0.89	1.5	0.29	0	0.54	0	1.81
TRINITY_DN110237_c0_g1_i1.p1	0.6	0.27	0	1.06	0.29	0.94	1.24	0	0	0.24	0	0	0	0	0	0	0	0	0	0	0	AT3G21550.1	1.25e-27		DMP2_ARATH	1.23e-26
TRINITY_DN11024_c0_g1_i10.p1	1.96	2.13	1.76	1.63	1.88	2.62	2.37	2.22	2.03	1.99	2.34	2.35	3.11	3.15	3.34	2.85	2.23	2.79	4.26	3.94	1.84	AT3G30200.1	1.15e-06
TRINITY_DN110253_c0_g1_i1.p1	0	0	0	0	0	0	0	0	0	0	0	0	0	0	0.56	0	0	0	0.77	0	0.25	AT1G30580.1	2.6e-75	Obg-like ATPase 1 [Source:UniProtKB/Swiss-Prot;Acc:Q9SA73]	OLA1_YEAST	8.41e-105
TRINITY_DN110265_c0_g1_i1.p1	0	0	0	0	0	0	0	0	0	0.31	0	0	0	0	0	0	0	0	0	0	0	AT4G23160.2	1.72e-67		POLR1_ARATH	6.03e-57
TRINITY_DN11027_c0_g2_i4.p1	2.96	5.11	9.3	8.36	8.84	7.19	6.35	5.01	8.1	7.84	7.36	8.64	6.57	5.64	6.14	5.42	8.27	11.34	14.54	11.15	8.19	AT3G11620.8	5.35e-129		LDAH_CHICK	8.57e-27
TRINITY_DN110308_c0_g1_i1.p1	0	0	0	0	0	0	0.56	0	0	0	0.19	0.17	0	0.16	0.37	0.36	0.18	0.17	0	0	0.16
TRINITY_DN110316_c0_g1_i2.p1	0	0.2	0	0	0.65	0	0.23	0	0	0	0	0	0	0	0	0.23	0	0.21	0.21	0	0	AT1G12030.1	3.57e-40
TRINITY_DN11031_c0_g1_i12.p1	4.23	2.5	5.01	4.6	4.97	6.57	5.14	5.69	6.05	6.29	4.82	7.58	8.87	8.27	9.47	8.5	9.92	8.73	12.28	8.76	7	AT4G10180.1	0	Light-mediated development protein DET1 [Source:UniProtKB/Swiss-Prot;Acc:P48732]	DET1_SOLLC	0
TRINITY_DN11031_c1_g1_i1.p1	11.73	11.74	15.8	8.88	16.4	12.48	8.06	14.28	15.66	14.1	15.8	16.9	18.94	15.08	19.85	15.11	18.55	19.12	22.76	18.99	15.21	AT1G80670.1	0	Protein RAE1 [Source:UniProtKB/Swiss-Prot;Acc:Q38942]	RAE1_ARATH	0
TRINITY_DN11031_c1_g1_i2.p1	1.65	1.47	1.6	3.63	2.78	2.77	0.21	1.33	1.12	2.83	4.38	1.51	1.5	2.15	0.21	1.65	1.62	2.63	2.06	0.8	0.55	AT1G80670.1	7.92e-145	Protein RAE1 [Source:UniProtKB/Swiss-Prot;Acc:Q38942]	RAE1_ARATH	7.79e-144
TRINITY_DN11032_c0_g1_i1.p1	3.84	3.2	3.62	2.31	3.07	3.01	3.05	2.98	3.39	3.81	3.41	2.04	4.23	3.17	1.8	2.75	1.85	2.4	2.59	1.49	1.24	AT1G18550.1	0	Kinesin-like protein KIN-8A [Source:UniProtKB/Swiss-Prot;Acc:F4ICA0]	KN8A_ARATH	0
TRINITY_DN110341_c0_g1_i2.p1	0	0	0	0	0	0	0	0	0	0	0	0	0	0	0	0.45	0	0	0.39	0	0.37	AT2G34480.1	6.35e-58	60S ribosomal protein L18a-2 [Source:UniProtKB/Swiss-Prot;Acc:P51418]	RL20B_YEAST	4.89e-89
TRINITY_DN11035_c0_g2_i1.p1	0	0.27	0	0.7	3.44	5.59	1.84	1.93	4.53	1.42	1.28	5.64	3.12	2.08	14.54	3.29	4.08	6.99	20.97	23.5	12.4	AT1G01490.2	1.15e-19		HIP39_ARATH	1.13e-18
TRINITY_DN1103_c0_g1_i1.p1	10.2	7.76	9.93	6.77	7.3	8.12	8.98	14	14.19	11.36	13.8	10.23	13.4	14.75	17.09	20.29	15.03	11.85	15.2	10.67	9.15	AT3G49400.1	0
TRINITY_DN1103_c0_g2_i11.p1	6.73	4.1	5.48	6.23	6.89	1.98	4.7	10.46	11.06	8.28	7.83	9.37	1.99	6.27	8.56	6.86	6.63	7.45	9.5	7.23	7.41	AT4G02150.1	1.43e-06	Importin subunit alpha-3 [Source:UniProtKB/Swiss-Prot;Acc:O04294]
TRINITY_DN1103_c0_g2_i13.p1	8.75	9.72	15.04	6.62	11.22	10.69	15.81	10.83	13.92	8.48	12.55	8.6	13.19	12.79	23.69	15.95	20.51	11.85	12.41	15.34	8.26
TRINITY_DN1103_c1_g1_i1.p1	31.63	28.47	25.51	19.81	21.09	23.86	24.19	34.88	34.38	42.76	47.49	37.31	39.05	34.65	41.65	34.72	41.42	38.35	49.5	41.13	45.14	AT3G02530.1	0	T-complex protein 1 subunit zeta 1 [Source:UniProtKB/Swiss-Prot;Acc:Q9M888]	TCPZA_ARATH	0
TRINITY_DN1103_c4_g1_i1.p1	6.7	6.71	6.13	4.64	5.94	7.1	7.97	8.16	8.91	7.24	7.39	6.21	6.59	10.95	14.34	9.81	10.37	10.78	14.47	10.83	6.69
TRINITY_DN11040_c0_g1_i2.p1	0.79	0.73	0.34	0	0	0	0.42	0.37	0	0	0	0	0.42	1.05	0	0	0	0	0.72	0.38	0.34
TRINITY_DN110416_c0_g1_i1.p1	0	0	0.52	0	0	0	0	0	0	0	0	0	0	0	0	0	0	0	0	0	0	AT4G23160.2	5.34e-25		POLR1_ARATH	4.98e-38
TRINITY_DN110417_c0_g1_i1.p1	0	0	0.2	0	0	0	0	0	0.26	0	0	0	0	0.2	0	0	0	0.21	0	0	0.21	AT4G25500.3	4.41e-69	Serine/arginine-rich splicing factor RS40 [Source:UniProtKB/Swiss-Prot;Acc:P92965]	RS40_ARATH	1.39e-65
TRINITY_DN11041_c0_g1_i6.p1	0	0.56	0	0	0	0	0	0	0	0.46	0	0	0	0	0	0.62	0	0	0	0	0
TRINITY_DN11042_c0_g2_i1.p1	12.59	10.57	9.22	7.03	10.46	11.19	11.54	14.72	10.06	10.04	11.28	11.54	13.17	13.69	14.79	12.1	11	12.12	15.8	12.09	10.45	AT1G49040.1	0	DENN domain and WD repeat-containing protein SCD1 [Source:UniProtKB/Swiss-Prot;Acc:Q8RXA7]	SCD1_ARATH	0
TRINITY_DN11043_c1_g2_i1.p1	21.56	25.75	39.91	21.24	15.17	14.33	21.15	31.95	46.88	26.69	19.78	13.3	24.42	34.62	29.96	31.31	29.66	20.21	14.81	13.5	24.11	AT1G69800.1	7.17e-172	SNF1-related protein kinase regulatory subunit gamma-1-like [Source:UniProtKB/Swiss-Prot;Acc:Q9CAR3]	KINGL_ARATH	7.05e-171
TRINITY_DN11044_c0_g5_i4.p1	23.29	19.01	25.22	18.68	13.8	19.97	18	23.61	23.56	24.92	29.14	32.71	24.07	22.52	27.49	23.09	25.83	32.31	29.57	32.14	30.32	AT1G65560.1	8.6e-173		DBR_TOBAC	4.36e-159
TRINITY_DN11045_c1_g1_i3.p1	0	1.26	0	0	0	0	0	0	0	0	0	0	0	0.4	0	0.47	0	0	0	0	0
TRINITY_DN110460_c0_g1_i1.p1	0	0	0	0	0	0	0	0	0	0	0	0	0.66	0	0	0	1.18	1.07	0	0	0
TRINITY_DN11046_c0_g1_i11.p1	0.6	0.79	0.69	0.23	1.15	0.81	0.81	1.65	2.05	1.96	1.04	1.4	1.74	1.03	1.62	2.57	2.06	2.55	2.99	3.87	4.23	AT1G80510.1	0		AVT6E_ARATH	0
TRINITY_DN11046_c0_g1_i12.p1	1.58	1.45	0	0.47	0.77	0.42	1.25	0	0.43	0.31	0	1.06	0.85	1.05	0.79	0.4	0.39	1.08	1.08	0	0	AT1G80510.1	1.3e-27		AVT6E_ARATH	1.28e-26
TRINITY_DN11046_c0_g1_i7.p2	1.49	0.81	0	0	0.87	0.63	0.31	1.39	1.3	1.19	0.32	1.89	1.26	1.31	0.9	1.81	0.59	1.35	1.62	0.87	0
TRINITY_DN11046_c1_g1_i1.p1	2.63	2.93	6.8	4.88	1.27	1.81	1.57	3.64	10.7	2.82	4.66	4.81	2.95	3.42	3.52	3.06	5.16	3.78	1.59	0.63	2.51	AT1G27990.1	8.56e-121
TRINITY_DN11047_c0_g1_i1.p1	19.29	13.31	22.09	12.31	14.27	20.97	26.05	31.38	23.21	32.61	38.12	30.12	35.99	33.4	14.81	17.2	21.7	28.78	18.07	24.22	14.81	AT3G61430.2	5.16e-16	Aquaporin PIP1-1 [Source:UniProtKB/Swiss-Prot;Acc:P61837]	PIP12_MAIZE	5.8e-16
TRINITY_DN11048_c0_g1_i2.p1	1.77	1.6	0.76	0.7	1.71	1.23	0.92	2.18	1.61	1.64	1.27	0.53	2.17	4.12	4.71	3.57	3.19	1.07	4	0.28	2.31
TRINITY_DN110491_c0_g1_i1.p1	0	0	0	0	0.52	0	0	0	0	0.41	0	0.47	0.58	0	0	0	1.05	0	0.97	0	0
TRINITY_DN1104_c0_g1_i14.p1	13.84	13.26	11.64	8.98	9.53	10.39	14.57	14.26	17.12	10.06	11.34	9.26	13.54	15.19	15.74	17.43	12.42	11.23	11.16	12.61	12.58	AT2G28880.1	0	Aminodeoxychorismate synthase, chloroplastic [Source:UniProtKB/Swiss-Prot;Acc:Q8LPN3]	ADCS_SOLLC	0
TRINITY_DN1104_c0_g1_i6.p2	29.17	23.48	23.44	20.54	24.68	21.87	21.4	18.84	27.03	25.75	23.75	23.16	24.28	22.25	16.05	27.33	30.43	33.43	28.17	16.53	15.55	AT1G69170.1	7.41e-46	Squamosa promoter-binding-like protein 6 [Source:UniProtKB/Swiss-Prot;Acc:Q94JW8]	SPL6_ARATH	7.29e-45
TRINITY_DN1104_c1_g1_i1.p1	3.78	13.17	12.09	13.67	4.71	4.57	0	11.38	47.88	3.37	33.45	48.5	7.34	6.75	25.38	6.27	79.65	25.74	32.31	68.91	31.3	AT1G14700.4	4.59e-83	Purple acid phosphatase 3 [Source:UniProtKB/Swiss-Prot;Acc:Q8H129]	PPA3_ARATH	9.2e-81
TRINITY_DN110505_c0_g1_i2.p1	0.49	0	0	0.19	0	0	0.17	0	0.18	0	0.68	0.38	0.25	0.35	0.17	0.24	0.56	0.37	0.15	0.56	0.37	AT3G54140.2	0	Protein NRT1/ PTR FAMILY 8.1 [Source:UniProtKB/Swiss-Prot;Acc:Q9M390]	PTR1_ARATH	0
TRINITY_DN11054_c0_g1_i1.p1	15.01	25.26	22.35	15.31	14.8	18.17	33.55	11.74	18.94	19.27	18.8	16.25	23.52	19.56	13.55	13.07	17.95	15.48	21.61	10.53	22.83	AT5G42570.1	1.14e-80		BAP31_MOUSE	4.06e-06
TRINITY_DN110552_c0_g1_i2.p1	0	0	0	0	0	0	0	0	0	0.48	0	0	0	0.56	0	0	0	0	0	0.6	0	AT3G24255.4	1.05e-20		RNHX1_ARATH	1.38e-08
TRINITY_DN110552_c0_g2_i2.p1	0.12	0	0.11	0	0.12	0	0	0	0	0	0.13	0.11	0	0	0	0.48	0.24	0.11	0.11	0	0.11	AT3G24255.4	4.16e-28		RNHX1_ARATH	6.05e-27
TRINITY_DN110552_c0_g3_i1.p1	0	0	2.17	0	0.49	0	0	0	0	0	0	0	0	0	0	0	0	0	0	0	0	AT3G24255.3	1.69e-29		RNHX1_ARATH	8.76e-28
TRINITY_DN110567_c0_g1_i1.p1	0.56	0	0.24	0	0	0	0.29	0	0.61	0	0	0	0	0	0	0.28	0.28	0	0	0	0				POLR1_ARATH	4.06e-21
TRINITY_DN11057_c0_g2_i1.p1	14.8	7.03	10.73	9.98	9.44	9.91	12.62	15.63	13.6	11.49	12.86	17.25	20.3	15.96	5.7	6.48	5.63	10.67	8.23	12.35	7.86	AT1G70250.1	8.83e-13		LTPG7_ARATH	1.29e-11
TRINITY_DN110591_c0_g1_i1.p1	0	0	0	0	0	0	0	0	0	0	0	0	0	0	0	0	0	0.51	0	0	0	AT3G48930.1	1.71e-89	40S ribosomal protein S11-1 [Source:UniProtKB/Swiss-Prot;Acc:P16181]	RS11_EUPES	4.25e-92
TRINITY_DN1105_c0_g1_i6.p1	2.55	1.15	1.98	4.5	2.95	1.33	1.84	2.59	3.33	4.5	2.74	3.72	2.66	3.11	2.3	1.79	2.01	3.7	2.31	3.7	2.01				SBT_PETHY	2.82e-10
TRINITY_DN11060_c0_g1_i1.p1	103.75	118.26	132.05	70.15	85.89	107.01	112.03	123.3	102.75	111.56	100.19	95.49	101.29	123.08	113.25	128.82	132.77	136.81	77.32	118.56	115.23	AT4G26860.1	6.02e-91		PLPHP_HUMAN	1.78e-36
TRINITY_DN11060_c0_g1_i6.p1	85	115.28	115.39	98.69	93.69	83.32	110.48	112.79	116.9	114.05	90.96	106.74	90.57	109.68	99.38	146.04	126.77	132.51	90.09	107.75	108.4	AT4G26860.1	9.98e-75		PLPHP_HUMAN	2.31e-43
TRINITY_DN11062_c0_g1_i1.p1	0.49	2.13	1.09	0.56	1.21	0.79	0.78	1.33	1.99	1.98	2.11	1.45	1.68	1.99	7.77	8.99	7.14	6.09	7.2	4.03	6.11	AT2G45570.1	1.78e-118	Cytochrome P450 76C2 [Source:UniProtKB/Swiss-Prot;Acc:O64637]	C80B3_PAPSO	1.11e-131
TRINITY_DN110630_c0_g1_i1.p1	0	0.31	0	0	0	0	0	0	0	0	0	0	0	0	0	0	0	0	0	0	0	AT5G22510.2	1.73e-137	Alkaline/neutral invertase E, chloroplastic [Source:UniProtKB/Swiss-Prot;Acc:Q9FK88]	NIN3_ORYSJ	2.27e-148
TRINITY_DN11063_c0_g1_i1.p1	13.01	10.18	4.7	4.67	7.97	10.93	9.96	6.93	6.74	8.42	7.98	6.3	9.78	7.17	1.34	0.4	1.78	1.42	1.34	1.67	0.67	AT4G34860.2	0	Probable alkaline/neutral invertase B [Source:UniProtKB/Swiss-Prot;Acc:Q9SW48]	INVB_ARATH	0
TRINITY_DN11065_c0_g1_i10.p1	6.77	7.45	4.57	6.96	11.67	7.7	7.63	5.73	8.67	9.87	4.78	10.39	8.67	9.01	9.72	11.59	9.85	9.88	8.27	6.54	5.39	AT5G19830.1	1.15e-105	Peptidyl-tRNA hydrolase, mitochondrial [Source:UniProtKB/Swiss-Prot;Acc:Q6NLS8]	PTHM_ARATH	1.13e-104
TRINITY_DN110663_c0_g1_i1.p1	1.31	0.6	0	0	0	0	0	0	0.36	0	0	0	0	0.58	0	0	0	0	0	0	0
TRINITY_DN11067_c0_g1_i1.p1	52.44	59.53	57.92	45.41	49.83	41.71	39.92	57.67	62.8	74.89	81.89	54.94	54.9	56.78	65.45	71.45	69	65.54	56.9	42.17	47.45	AT1G48520.1	0	Glutamyl-tRNA(Gln) amidotransferase subunit B, chloroplastic/mitochondrial [Source:UniProtKB/Swiss-Prot;Acc:Q9FV81]	GATB_RICCO	0
TRINITY_DN11068_c0_g1_i2.p1	8.05	6.22	8.23	4.25	7.24	8.16	7.64	10.62	12.57	10.76	9.33	10.01	13.13	11.6	19.87	15.2	16.92	16.21	25.4	16.44	15.77	AT2G40930.2	0	Ubiquitin carboxyl-terminal hydrolase 5 [Source:UniProtKB/Swiss-Prot;Acc:O22207]	UBP5_ARATH	0
TRINITY_DN1106_c0_g1_i2.p1	18.5	15.76	22.32	24.9	35.46	25.84	10.79	15.98	16.46	20.04	21.19	37.05	21.41	14.51	1.94	5.93	18.7	9.19	6.14	3.31	3.95
TRINITY_DN1106_c0_g1_i3.p1	0.83	0.77	0.72	0.5	0.81	0.89	0	1.95	3.66	1.64	4.64	0.37	3.13	1.85	2.89	1.71	1.23	0.75	0.76	1.21	2.85
TRINITY_DN1106_c0_g1_i9.p1	16.67	22.65	12.86	12.95	25.6	19.28	14.98	19.54	8.26	21.14	18.3	14.37	12.29	7.66	9.23	10.5	9.75	8.1	7.49	7.62	12.5
TRINITY_DN11070_c0_g1_i4.p1	5.16	5.38	3.8	4.25	4.96	6.22	8.18	5.02	3.94	3.82	4.13	5.47	6.39	4.05	8.28	5.27	5.51	8	11	9.83	7.71	AT5G53340.1	3.59e-145	Hydroxyproline O-galactosyltransferase HPGT1 [Source:UniProtKB/Swiss-Prot;Acc:Q94F27]	B3GTB_ARATH	3.53e-144
TRINITY_DN110722_c0_g1_i2.p1	4.19	4.7	6.47	3.69	6.94	6.21	4.24	5.47	6.03	6.4	8.85	15.77	10.64	9.69	9.88	4.89	10.33	9.69	19.4	12.25	9.99	AT1G32780.1	5.83e-175	Alcohol dehydrogenase-like 3 [Source:UniProtKB/Swiss-Prot;Acc:A1L4Y2]	ADHL3_ARATH	5.73e-174
TRINITY_DN110735_c0_g1_i1.p1	0	0	0	0	0	0.35	0	0	0	0	0.18	0	0	0.15	0	0	0	0	0	0.16	0	AT3G22890.1	0	ATP sulfurylase 1, chloroplastic [Source:UniProtKB/Swiss-Prot;Acc:Q9LIK9]	APS1_ARATH	0
TRINITY_DN110759_c0_g1_i1.p1	0.13	0.11	0	0.58	0.36	0.13	0	0	0	0.2	0.26	0.12	0.13	0.11	0	0.12	0.37	0.91	0.23	0	0.45				CAPSD_WCCVB	6.16e-130
TRINITY_DN11076_c0_g2_i3.p1	98.56	113.56	102.28	85.37	92.08	118.17	112.64	98.48	106.23	106.9	70.71	104.19	83.67	107.51	158.29	216.04	186.19	162.77	175.67	227.19	236.25	AT1G23440.1	9.53e-112		PCP_PYRFU	6.55e-18
TRINITY_DN110770_c0_g2_i1.p1	0	0	0	0	0	0.26	0	0	0	0	0	0	0	0	0	0	0	0	0	0	0.22	AT1G10760.2	2.28e-117	Alpha-glucan water dikinase 1, chloroplastic [Source:UniProtKB/Swiss-Prot;Acc:Q9SAC6]	GWD1_SOLTU	1.99e-125
TRINITY_DN110775_c0_g1_i1.p1	0.26	0	0.23	0.31	0	0	0.54	0	0	1.05	0.28	0	0	0.23	0	0	0	0	0	0	0	AT5G52950.1	5.42e-25
TRINITY_DN110775_c0_g2_i1.p1	0	0	0.17	0	0.58	0	0	0	0	0.16	0	0.18	0.21	0.17	0	0.2	0	0	0	0	0	AT5G52950.2	5.23e-39
TRINITY_DN110775_c0_g3_i1.p1	0	0.31	0.29	0	0	0.72	0.36	0	0	0	0	0	0	0	0	0.35	0	0	0	0	0.3	AT5G52950.1	4.07e-14
TRINITY_DN110779_c0_g1_i1.p1	0	0	0	0.63	0	0	1.11	0	0	0	0	0	0	0	0	0	0	0	0	0	0
TRINITY_DN11077_c0_g2_i1.p1	37.04	52.12	32.99	27.9	28.88	41.9	40.89	53.48	49.54	33.61	36.9	28.92	44.95	57.5	91.14	81.16	70.25	54.99	70.95	97.61	108.77	AT3G15040.1	2.3e-13
TRINITY_DN110780_c0_g2_i1.p1	0	0	0	0	0	0.61	0	0.27	0	0	0	0	0	0	0	0	0	0	0	0	0.25	AT4G23140.1	4.41e-55	Cysteine-rich receptor-like protein kinase 6 [Source:UniProtKB/Swiss-Prot;Acc:Q9C5S9]	CRK6_ORYSJ	2.94e-69
TRINITY_DN110782_c0_g1_i2.p1	0	0.19	0	0	0	0.66	0.65	0	0	0.17	0.45	0.19	0.44	0.37	0	0.42	0	0	0.19	0	0	AT1G31040.1	2.04e-52		RITF1_ARATH	1.06e-27
TRINITY_DN110796_c0_g1_i1.p1	0	0	0	0	0	0	0	0	0	0	0	0	0	0	0	0	0	1.71	0.57	0	0	AT5G08650.2	8.01e-45	Translation factor GUF1 homolog, chloroplastic [Source:UniProtKB/Swiss-Prot;Acc:Q9FNM5]	LEPA_CUTAK	8.13e-89
TRINITY_DN110797_c0_g3_i1.p1	0.27	0	0	0	0	0.28	0.28	0.25	0	0	0	0	0	0.24	0	0.55	0.27	0	0	0	0
TRINITY_DN1107_c1_g1_i3.p1	12.38	15.55	15.1	8.73	8.94	13.11	11.16	17.77	13.22	11.34	14.02	14.75	15.42	18.09	9.18	10.51	8.05	8.77	8.25	10.56	10.34	AT1G53000.1	8.11e-164	3-deoxy-manno-octulosonate cytidylyltransferase, mitochondrial [Source:UniProtKB/Swiss-Prot;Acc:Q9C920]	KDSB_ARATH	7.98e-163
TRINITY_DN11080_c0_g1_i7.p1	2.64	0.41	0.76	2.11	1.28	0.94	0.46	4.94	1.45	0.69	1.97	2.34	1.42	2.34	3.92	1.81	2.17	1.59	3.19	0.85	1.12
TRINITY_DN110824_c0_g1_i4.p1	0	0.45	0	0	0	0	0	0	0	0	0	0	0	0	0	0	0	0	0	0	0				POL_MLVRD	1.38e-07
TRINITY_DN110824_c0_g1_i5.p1	0.34	0	0	0	0	1.43	0.71	0.32	0.37	0.27	0	0	0.36	0.89	0.34	0.34	0	0	0.31	0	0
TRINITY_DN110827_c0_g1_i4.p1	0	0	0	0	0	0	0	0	0	0	0	0	0	0.47	0	0	0	0	0	0	0.44
TRINITY_DN11083_c0_g2_i2.p1	193.74	228.27	237.97	231.32	222.56	203.21	224.33	208.07	229.14	236.14	259.52	239.21	254.01	207.7	144.74	132.4	141.73	168.27	135.09	126.54	97.33	AT1G32990.1	5.02e-94	50S ribosomal protein L11, chloroplastic [Source:UniProtKB/Swiss-Prot;Acc:Q9MAP3]	RK11_ARATH	4.94e-93
TRINITY_DN11085_c0_g1_i1.p1	18.43	16.69	20.7	12.98	19.98	18.82	17.47	16.38	19.79	22.73	15.16	26.52	17.86	8.72	28.8	19.65	29.81	30.99	34.4	34.18	59.61	AT4G08230.1	9.33e-18
TRINITY_DN110884_c0_g1_i1.p1	0.07	0.11	0.06	0.08	0.06	0.53	0.07	0.36	0.07	0.27	0.07	0.06	0.26	0.22	0.13	0.06	0	0.06	0.06	0	0	AT4G22130.1	0	Protein STRUBBELIG-RECEPTOR FAMILY 8 [Source:UniProtKB/Swiss-Prot;Acc:Q6R2J8]	SRF8_ARATH	0
TRINITY_DN110888_c0_g1_i2.p1	0	0	0	0	0	0	0	0.78	0	0	0	0.74	0	0.74	0	0	0	0	0	0	0.71
TRINITY_DN110899_c0_g1_i1.p1	0	0.16	0.16	0	0.35	0.19	0.92	0.17	0.2	0	0	0	0	0.62	0	0.18	0	0	0	0	0.32	AT5G01660.1	1.35e-87		NS1BA_DANRE	3.34e-42
TRINITY_DN1108_c0_g1_i1.p1	5.72	9.47	10.44	5.59	6.84	4.6	4.21	4.38	8.46	3.74	5.88	6.96	6.41	6.8	2.35	1.36	1.99	1.52	1.52	4.55	2.04	AT4G37970.1	1.78e-82	Probable cinnamyl alcohol dehydrogenase 6 [Source:UniProtKB/Swiss-Prot;Acc:O65621]	10HGO_CATRO	4e-101
TRINITY_DN1108_c0_g3_i1.p1	0	0.13	0	0	0	0	0	0	0	0	0.15	0.13	0.15	0	4.71	0	0	0	0.53	0	0	AT4G39330.1	7e-155	Probable cinnamyl alcohol dehydrogenase 9 [Source:UniProtKB/Swiss-Prot;Acc:P42734]	REDX1_CATRO	8.19e-179
TRINITY_DN11090_c0_g3_i2.p1	0.51	0	0	0.61	0.49	0	0	0	0	0.39	0	0.44	0	0	0	0	0	0	0	0	0	AT5G63800.1	7.9e-08	Beta-galactosidase 6 [Source:UniProtKB/Swiss-Prot;Acc:Q9FFN4]	BGA12_ORYSJ	1.2e-07
TRINITY_DN110925_c0_g1_i1.p1	0	0	0	0	0	0	0	0	0	0	0	0	0	0	0	1.6	0	0	0	0	0
TRINITY_DN11092_c0_g1_i1.p1	0.97	0.9	0	0	0.47	0	0.52	0.46	1.61	0	0	0	0.53	0.44	0	0.5	1.44	0	0	0.47	0	AT4G23160.2	3.4e-33		COPIA_DROME	1.82e-40
TRINITY_DN110937_c0_g1_i1.p1	0	0	0	0	0	0	0	0	0	0.44	0	0	0	0.51	0	0	0	0	0	0	0	AT5G05010.1	1.44e-49	Coatomer subunit delta [Source:UniProtKB/Swiss-Prot;Acc:Q93Y22]	COPD1_ORYSJ	9.45e-93
TRINITY_DN110939_c0_g1_i1.p1	0	0.61	0	0	0	0	0.7	0.61	0	0	0	0	0.72	0	0	0	0	0	0	0	0	AT5G54160.1	9.15e-20	Flavone 3'-O-methyltransferase 1 [Source:UniProtKB/Swiss-Prot;Acc:Q9FK25]	COMT2_OCIBA	2.51e-22
TRINITY_DN110939_c0_g1_i1.p2	0	0	0	0	0	0	0	0	0	0	0	0	0	0	0	0	0	0	0	0	0	AT1G33030.1	9.98e-44		OMT2_CHRAE	1.69e-43
TRINITY_DN110943_c4_g1_i1.p1	0	0	0	0	0	0	0	0	0	0	0	0	0	0	0	0.58	0	0	0	0	0	AT4G23160.2	3.38e-29		POLR1_ARATH	7.64e-30
TRINITY_DN11094_c0_g1_i1.p1	1.28	1.96	1.83	2.04	2.07	3.18	4.93	3.58	2.34	5.02	2.85	2.27	1.37	3.4	0.42	3.93	12.58	5.77	6.56	4.11	5.82	AT4G21740.1	1.16e-12
TRINITY_DN11095_c0_g1_i1.p1	17.24	16.2	25.35	23.26	28.19	25.85	23.38	23.34	45.64	35.23	36.11	44.31	34.79	28.76	48.26	71.38	93.23	79.87	88.04	86.05	86.79	AT2G30080.1	4.43e-135	Zinc transporter 6, chloroplastic [Source:UniProtKB/Swiss-Prot;Acc:O64738]	ZIP6_ARATH	4.36e-134
TRINITY_DN11097_c0_g1_i1.p1	2.13	3.9	2.09	1.65	1.23	1.31	1.59	1.57	5.22	3.46	1.93	3.42	1.6	4.15	12.06	8.73	8.51	5.94	7.21	6.32	6.72	AT5G01380.1	1.52e-24	Trihelix transcription factor GT-3a [Source:UniProtKB/Swiss-Prot;Acc:Q9SDW0]	TGT3A_ARATH	1.5e-23
TRINITY_DN110987_c0_g1_i1.p1	0.21	0	0.18	0	0	0.43	0.21	0.19	0	0.17	0	0	0	0	0	0	0	0	0	0	0.37	AT5G49910.1	1.57e-139	Heat shock 70 kDa protein 7, chloroplastic [Source:UniProtKB/Swiss-Prot;Acc:Q9LTX9]	HSP7S_PEA	3.31e-139
TRINITY_DN1109_c0_g1_i10.p1	2.72	1.26	2.01	2.25	1.12	0.79	1.05	1.54	2.37	2	2.43	1.8	1.46	2.33	2.48	2.94	2.16	3.29	2.69	1.25	2.43
TRINITY_DN1109_c0_g1_i10.p2	1.14	0.85	0.82	0.67	0.55	0.98	0.19	0.7	2.88	1.07	1.2	1.22	0.78	0.82	2.1	1.7	2.24	1.55	5.33	1.65	1.51
TRINITY_DN1109_c0_g2_i1.p1	0.9	0.4	2.7	0.79	1.29	0.69	1.15	3.51	5.35	2.16	3.34	1.84	4.42	2.72	2.92	4.03	1.32	4.47	2.64	3.46	1.58
TRINITY_DN110_c0_g2_i10.p1	0	0.83	0	0	0.87	0	0.47	0	0	0	0	0	0.97	0.4	0.44	0	0.44	0.81	2.04	0.43	0	AT3G58040.2	2.55e-09	E3 ubiquitin-protein ligase SINAT2 [Source:UniProtKB/Swiss-Prot;Acc:Q9M2P4]	SINA2_ARATH	6.48e-08
TRINITY_DN110_c0_g2_i14.p1	1.61	1.94	1.52	1.87	9.13	9.58	4.01	7.39	5.06	10.93	3.06	8.93	7.2	4.78	4.14	4.35	7.18	7.85	12.84	5.65	5.61	AT3G58040.1	3.28e-160	E3 ubiquitin-protein ligase SINAT2 [Source:UniProtKB/Swiss-Prot;Acc:Q9M2P4]	SINA2_ARATH	3.22e-159
TRINITY_DN110_c0_g3_i1.p1	26.39	25.28	20.13	14.06	20.2	25.39	29.21	23.51	24.69	21.52	18.99	24.05	20.45	27.79	34.69	27.99	28.31	27.39	40.12	36.83	40.28	AT4G27880.1	0	E3 ubiquitin-protein ligase SINAT4 [Source:UniProtKB/Swiss-Prot;Acc:Q9STN8]	SINA4_ARATH	0
TRINITY_DN111005_c0_g1_i1.p1	0	0	0	0	0	0	0	0	0	0	0	0	0	0	0	0	0	0	0	0	0
TRINITY_DN11103_c0_g1_i2.p1	0	0.17	0	0.22	0	0	0	0	0	0	0	0	0	0	0	0	0	0	0	0.18	0.17	AT1G06040.1	4.05e-48	B-box zinc finger protein 24 [Source:UniProtKB/Swiss-Prot;Acc:Q96288]	BBX24_ARATH	3.99e-47
TRINITY_DN11103_c0_g1_i4.p1	0.2	0	0	0	0	0.42	0	0	0	0	0	0	0	0	0	0	0.6	0	0	0	0	AT1G06040.1	2.67e-48	B-box zinc finger protein 24 [Source:UniProtKB/Swiss-Prot;Acc:Q96288]	BBX24_ARATH	2.63e-47
TRINITY_DN11104_c0_g1_i4.p1	2.96	4.12	14	11.29	4.33	3.72	3.67	4.17	8.71	8.08	6.15	8.68	8.04	7.06	7.31	10.72	20.92	11.14	14.33	5.25	10.01	AT5G05410.2	3.09e-29	Dehydration-responsive element-binding protein 2A [Source:UniProtKB/Swiss-Prot;Acc:O82132]	DRE2A_ARATH	5.91e-28
TRINITY_DN11104_c0_g2_i1.p1	49.58	55.82	64.63	46.94	54.41	52.32	63.39	74.57	83.33	72.98	66.4	81.91	85.11	83.83	126.11	114.41	124.88	103.55	115.36	115.95	135.03	AT2G40350.2	7.4e-29	Putative dehydration-responsive element-binding protein 2H [Source:UniProtKB/Swiss-Prot;Acc:Q9SIZ0]	DRE2H_ARATH	8.16e-28
TRINITY_DN11104_c0_g2_i3.p1	69.8	60.28	58.83	42.88	55.34	35.23	60.32	56.04	70.06	61.69	54.42	52.63	46.47	56.74	64.24	62.18	67.9	56.99	61.18	68.45	108.93	AT2G40350.2	2.69e-43	Putative dehydration-responsive element-binding protein 2H [Source:UniProtKB/Swiss-Prot;Acc:Q9SIZ0]	DRE2H_ARATH	2.97e-42
TRINITY_DN11106_c0_g2_i3.p1	44.9	40.3	50	29.93	24.96	27.43	31	40.6	47.41	51.21	60.65	39.65	30.49	36.36	50.55	50.91	45.68	53.87	56.26	45.83	50.72	AT4G38710.2	1.91e-33	Eukaryotic translation initiation factor 4B3 [Source:UniProtKB/Swiss-Prot;Acc:Q9SZP8]	IF4B3_ARATH	1.97e-32
TRINITY_DN11106_c0_g4_i2.p1	15.36	18.36	17.97	10.24	15.91	16.03	12.33	18.63	18.98	13.04	10.7	19.11	14.68	22.03	22.33	38.97	34.77	33.92	39.1	30.44	30.13	AT1G62990.1	2.65e-158	Homeobox protein knotted-1-like 7 [Source:UniProtKB/Swiss-Prot;Acc:Q9FPQ8]	HD1_BRANA	9.72e-158
TRINITY_DN11108_c0_g1_i1.p1	5.24	4.48	4.03	3.64	5.63	4.48	4.57	4.59	5.18	6.32	7.73	6.32	6.65	4.92	3.32	5.19	5.87	6.43	5.76	2.79	3.1	AT3G19180.1	0	Plastid division protein CDP1, chloroplastic [Source:UniProtKB/Swiss-Prot;Acc:Q8VY16]	CDP1_ARATH	0
TRINITY_DN11109_c0_g1_i6.p1	1.38	1.27	0.4	1.66	0	0.49	0.97	0.86	1.52	2.52	1.03	0.41	0	2.46	1.82	1.89	2.72	0.83	1.67	1.33	2.73	AT2G36130.1	3.13e-50	Peptidyl-prolyl cis-trans isomerase CYP18-2 [Source:UniProtKB/Swiss-Prot;Acc:Q9SIH1]	CP18B_ARATH	3.08e-49
TRINITY_DN11109_c0_g2_i1.p1	330.88	366.34	282.02	216.9	216.84	246.74	295.42	288.54	295.27	278.51	312.75	219.7	275.13	258.61	159.95	232.79	188.38	204.2	125.05	131.01	122.84	AT4G24930.1	1.19e-72	Thylakoid lumenal 17.9 kDa protein, chloroplastic [Source:UniProtKB/Swiss-Prot;Acc:Q9SW33]	TL1Y_ARATH	1.17e-71
TRINITY_DN1110_c0_g1_i1.p2	11.03	11.28	6.78	8.89	11.28	7.97	7.86	9.89	15.1	10.62	10.8	12.89	13.78	11.79	3.11	10.92	7.78	7.12	8.11	3.05	2.65				POLR1_ARATH	7.9e-20
TRINITY_DN1110_c0_g1_i2.p1	0.15	0.13	0.26	0	1.17	1.09	0.15	0.98	0.33	0.62	1.11	1.26	1.4	0.26	1.99	1.35	0.45	0.69	2.06	2.35	1.22	AT1G43760.1	8.31e-08
TRINITY_DN1110_c0_g1_i2.p2	0	0.71	0.52	0.47	0.38	1.03	0.41	1.1	1.51	0.64	0.63	0.37	1.03	1.03	2.01	1.59	1.57	0.72	2.71	3.85	1.41	AT2G01050.1	9.39e-38
TRINITY_DN1110_c0_g1_i5.p1	15.35	9.25	12.98	10.32	18.04	18.91	12.17	17.03	9.52	10.8	17.29	14.15	8.87	10.27	18.06	13.99	13.03	15.56	19.37	22.4	15.46
TRINITY_DN1110_c2_g1_i1.p1	0	0	0	0	1.65	0	0.6	0.53	0.62	0.44	0	0.49	0	0.51	1.11	1.17	0	2.54	2.04	0	1.88	AT1G43760.1	3.49e-08
TRINITY_DN11110_c0_g1_i1.p1	1.62	0	0	0	0	1.76	0	3.56	0	0.42	0.62	0.47	1.18	0.48	0.53	1.12	2.66	1.95	0.98	0.52	0.91
TRINITY_DN11110_c0_g1_i1.p2	1.21	1.14	1.04	1.47	1.18	4.63	3.91	4.57	0	0.47	2.81	0.52	3.34	3.83	1.78	2.53	2.39	3.81	1.65	0.58	0
TRINITY_DN11110_c0_g2_i4.p1	2.84	2.86	0.27	0	0	0.99	1.31	0	0.34	0.5	0	0	0	0.28	0	0	0	0	0.29	0	0				POL4_DROME	8.36e-11
TRINITY_DN11111_c0_g1_i1.p1	6.23	3.75	5.39	2.65	2.59	15.73	12.08	1.9	9.97	1.95	2.48	3.48	4.13	6.14	29.14	5.32	8.25	6.33	15.6	28.69	20.7	AT1G10070.2	0	Branched-chain-amino-acid aminotransferase 2, chloroplastic [Source:UniProtKB/Swiss-Prot;Acc:Q9M439]	BCAT2_ARATH	0
TRINITY_DN11111_c0_g2_i1.p1	0.86	0.96	1.85	0	0.41	0.44	1.1	1.38	0.23	0.86	0.23	0.2	0.89	0.19	0.43	0.86	2.1	0.58	0	0	0.76	ATMG00860.1	3.13e-09	Uncharacterized mitochondrial protein AtMg00860 [Source:UniProtKB/Swiss-Prot;Acc:P92523]	POL2_DROME	1.25e-31
TRINITY_DN11111_c0_g2_i1.p2	0	0.48	0	0	0.5	0	0	0.96	0	1.2	0	0.9	0	0.46	1.01	0	0.51	0.92	0.93	0.5	0.43
TRINITY_DN11111_c0_g3_i1.p1	0	0	0	0.7	0	0	0	0	0	0	0	0	0	0	0	0	0	0	0	0	0
TRINITY_DN11111_c5_g1_i2.p1	0	0	0	0	0	0	0	0.52	0	1.29	0	0	0.61	1.5	0	0.58	0	0.5	0	0.54	0.93	AT4G23160.2	1.98e-18		M820_ARATH	7.83e-14
TRINITY_DN111122_c0_g2_i1.p1	0.65	0.61	0.51	0.25	0.36	0.33	0.27	0.25	0.41	0.18	0.39	0.66	0.6	0.6	0.44	0.42	0.63	0.54	0.63	0.05	0	AT1G06490.2	0	Callose synthase 7 [Source:UniProtKB/Swiss-Prot;Acc:Q9SHJ3]	CALS7_ARATH	0
TRINITY_DN11112_c0_g1_i14.p1	2.99	4.16	8.06	6.45	4.14	4.13	2.85	6.92	9.59	12.52	14.24	12.81	5.83	5.05	13	31.99	40.95	52.84	7.75	3.78	6.89	AT1G69850.1	0	Protein NRT1/ PTR FAMILY 4.6 [Source:UniProtKB/Swiss-Prot;Acc:Q8H157]	PTR19_ARATH	0
TRINITY_DN111134_c0_g2_i1.p1	0	0	0	0	0.52	0	0	0	0	0	0	0	0.58	0	0.52	0	0	0	0	0	0
TRINITY_DN11113_c0_g1_i10.p1	0.78	0.96	0.78	1.34	1.12	1.33	1.26	1.92	2.06	2.05	1.34	2	1.21	1.4	1.68	1.98	1.22	1.09	1.35	0.83	0.83	AT4G02750.1	4.57e-22	Pentatricopeptide repeat-containing protein At4g02750 [Source:UniProtKB/Swiss-Prot;Acc:Q9SY02]	PP301_ARATH	4.5e-21
TRINITY_DN11113_c0_g1_i17.p1	0	0	0.31	0.42	1.38	0.38	0	0.33	0.39	1.13	0.78	1.92	1.52	0	1.42	0.36	0.7	0	1.3	0.69	0.31
TRINITY_DN11114_c0_g1_i1.p1	67.11	59.82	51.94	31.84	51.91	60.58	53.46	53.51	49.71	77.46	64.66	53.32	74.77	62.61	59.92	58.88	58.69	67.22	74.31	67.5	47.77	AT3G15030.2	7.18e-75	Transcription factor TCP4 [Source:UniProtKB/Swiss-Prot;Acc:Q8LPR5]	TCP4_ARATH	7.07e-74
TRINITY_DN11114_c0_g1_i2.p1	9.31	10.12	4.92	8.14	6.4	9.38	9.99	9.43	5.44	8.87	14.31	7.3	8.11	9.66	4.2	6.34	8.94	10.42	9.44	6.34	4.63	AT3G15030.2	1.66e-49	Transcription factor TCP4 [Source:UniProtKB/Swiss-Prot;Acc:Q8LPR5]	TCP4_ARATH	1.63e-48
TRINITY_DN11115_c0_g2_i5.p1	0.04	0.35	0.19	0.15	0.42	0.27	0	0.4	0.19	0.4	0.41	0.25	0.67	0.42	0.45	0.56	0.83	0.73	0.8	0.21	0.32	AT4G23160.2	1.14e-48		POLX_TOBAC	5.94e-162
TRINITY_DN111167_c0_g1_i1.p1	0	0	0	0	0	0	0	0	0	0	0	0	0	0	0	0	0	0	0	0	1.12	AT4G20760.1	6.69e-12		NOR1_DOTSN	3.64e-40
TRINITY_DN11117_c0_g1_i1.p1	39.84	35.49	37.91	26.27	41.05	42.18	41.26	65.48	59.23	53.83	46.97	55.95	64.38	63.65	103.14	86.75	76.8	71.17	110.55	77.84	77.74	AT1G50200.1	0	Alanine--tRNA ligase [Source:UniProtKB/Swiss-Prot;Acc:P36428]	SYA_ARATH	0
TRINITY_DN11118_c1_g1_i1.p1	3.19	2.93	2.65	1.19	1.84	1.56	1.94	1.64	1.38	1.97	2.66	1.42	2.87	1.75	0	1.26	1.25	0.7	0.12	0.62	0.69	AT5G10100.3	3.07e-176	Probable trehalose-phosphate phosphatase I [Source:UniProtKB/Swiss-Prot;Acc:F4KFG5]	TPPI_ARATH	3.02e-175
TRINITY_DN11119_c0_g3_i1.p1	0.78	1.46	0.86	0.54	1.1	1.89	0.73	1.81	1.57	1.11	1.44	1.27	1.48	1.64	1.8	1.79	1.12	2.56	3.02	2.06	1.7	AT2G40720.1	0	Pentatricopeptide repeat-containing protein At2g40720 [Source:UniProtKB/Swiss-Prot;Acc:Q7XJN6]	PP197_ARATH	0
TRINITY_DN11119_c1_g1_i6.p1	0.23	0	0	0	0.65	1.17	0.23	0.21	0.74	0	0	0	0	0	0.91	0.23	0.44	0.21	4.1	2.41	2.19	AT5G05990.1	2.51e-12		YB95_ARATH	7.79e-08
TRINITY_DN1111_c0_g1_i10.p1	19.59	20.47	19.53	16.79	23.86	25.62	23.65	32.91	28.92	32.67	22.41	33.54	31.25	28.43	45.22	35.69	33.15	35.78	46.77	27.45	33.42	AT1G08130.1	0	DNA ligase 1 [Source:UniProtKB/Swiss-Prot;Acc:Q42572]	DNLI1_ARATH	0
TRINITY_DN1111_c0_g1_i11.p1	26.32	27.57	23.55	20.52	28.16	31.61	31.53	38.69	38.89	43.29	33.09	37.29	43.98	38.46	59.8	44.7	44.56	47.4	64.08	36.67	43.68	AT1G08130.1	0	DNA ligase 1 [Source:UniProtKB/Swiss-Prot;Acc:Q42572]	DNLI1_ARATH	0
TRINITY_DN111228_c0_g1_i1.p1	0.22	0	0	0.25	0.41	0	0.66	0.4	0.23	0.52	0.23	0.79	0.22	0.37	0	0	0.21	0	0	0	0	AT5G40020.1	2.09e-105		TLPH_ARATH	6.05e-57
TRINITY_DN11122_c0_g1_i1.p1	0	0	0	0.86	0	0	0.5	0.79	0.92	0.39	0	0.43	0	0	0	0	0	0.38	0.76	0.41	0	AT1G15520.2	7.82e-06	ABC transporter G family member 40 [Source:UniProtKB/Swiss-Prot;Acc:Q9M9E1]
TRINITY_DN11122_c0_g1_i2.p1	1.9	0.6	0.54	1.77	2.48	0	0.6	0	1.41	2.35	1.48	2.65	0	1.15	1.86	2	0.62	2.85	0	0.61	1.05	AT1G15520.2	3.82e-06	ABC transporter G family member 40 [Source:UniProtKB/Swiss-Prot;Acc:Q9M9E1]
TRINITY_DN11122_c0_g3_i3.p1	0.23	1.23	0.71	0.36	0.67	0.83	0.12	0.53	0.88	0.47	0.73	0.76	0.48	0.4	0.94	1.04	0	0.95	1.9	2.03	1.04	AT1G55730.2	0	Vacuolar cation/proton exchanger 5 [Source:UniProtKB/Swiss-Prot;Acc:Q8L783]	CAX2_ORYSJ	0
TRINITY_DN11122_c0_g3_i6.p1	0	0	0	0.17	0	0	0	0	0	0	0	0	0	0	0	0	1.09	0	0	0	0	AT1G55730.2	0	Vacuolar cation/proton exchanger 5 [Source:UniProtKB/Swiss-Prot;Acc:Q8L783]	CAX2_ORYSJ	0
TRINITY_DN111246_c0_g1_i3.p1	0.28	0	0	0	0.54	0.29	0.87	0.52	0	0.45	1.51	1.27	0.29	1.71	0.28	0	0.28	0	0.51	0	1.22	ATMG00300.1	4.09e-09	Uncharacterized mitochondrial protein AtMg00300 [Source:UniProtKB/Swiss-Prot;Acc:P93293]	POLR1_ARATH	5.62e-35
TRINITY_DN111249_c0_g1_i2.p1	0	0	0	0	0	0	0	0	0	0	0	0	0	0	0	0	0	0	0.48	0	0	AT2G28160.1	2.93e-06	Transcription factor FER-LIKE IRON DEFICIENCY-INDUCED TRANSCRIPTION FACTOR [Source:UniProtKB/Swiss-Prot;Acc:Q0V7X4]
TRINITY_DN11125_c0_g1_i21.p1	1.71	1.75	0.74	0.99	1.64	1.25	1.92	4.35	2.05	2.1	1.97	2.12	1.84	2.19	3.37	4.3	2.52	3.29	2.67	2.48	2.56	AT5G45570.1	3.15e-06
TRINITY_DN11126_c0_g1_i2.p1	0.25	0.22	0	0.43	0	0.13	0.13	0	0	0.1	0.65	0	0	0.11	0	0.12	0	0.23	0.34	0	0.11	AT1G67020.1	3.25e-07
TRINITY_DN111282_c0_g1_i1.p1	0	0	0.15	0	0.32	0	0.17	0	0	0	0	0	0	0	0	0	0	0	0.15	0	0.15				TF211_SCHPO	7.06e-52
TRINITY_DN111284_c0_g1_i1.p2	0.86	0.4	0	0	0	0	0	0.4	0	0	0	0.38	0	0.38	0	1.77	0	0	0	0.83	0.73
TRINITY_DN111284_c0_g1_i1.p4	0.44	0	0.38	1.6	0	0.48	0	0	0	0.7	0.5	0	0	0	0	0	0	0	0.4	0.43	0.76
TRINITY_DN11128_c0_g1_i3.p1	195.39	192.83	212.53	149.26	294.39	366.79	305.57	401.19	376.15	200.12	212.44	355.27	437.25	381.75	501.32	518	394.95	441.55	602.85	576.44	675.12	AT1G17730.1	4.58e-119	ESCRT-related protein CHMP1A [Source:UniProtKB/Swiss-Prot;Acc:Q8LE58]	CHM1A_ARATH	4.5e-118
TRINITY_DN11129_c0_g1_i10.p1	14.91	11.37	12.6	21.31	16.79	15.44	14.85	6.78	8.15	13.52	10.43	15.09	10.22	10.08	9.22	8.91	11.8	10.64	17.42	14.56	10.7	AT2G42280.1	2.87e-68	Transcription factor bHLH130 [Source:UniProtKB/Swiss-Prot;Acc:Q66GR3]	BH130_ARATH	2.82e-67
TRINITY_DN1112_c0_g3_i11.p1	3.86	4.76	4.17	4.25	4.89	4.26	3.72	6.46	5.77	3.49	2.58	5.06	6.04	4.82	8.24	13.31	6.17	7.45	6.34	4.66	2.54
TRINITY_DN111316_c0_g1_i1.p1	31.02	32.8	25.06	13.31	23.97	29.14	39.96	40.75	37.49	28.18	24.95	34.26	31.66	37.92	48.28	43.48	36.89	44.75	51.88	41.15	55.89	AT1G15860.2	9.49e-109		DCNL4_MOUSE	3.82e-35
TRINITY_DN111348_c0_g1_i1.p1	0	0	0	0	0	0	0	0	0	0	0	0	0	0	0	0	0	0	0.49	0	1.36
TRINITY_DN111357_c0_g1_i1.p1	0	0	0	0	0	0	0	1.02	0	0	0.62	0	0	0.48	0	0.56	0	0.49	0	0	0	AT4G40070.1	1.21e-16	RING-H2 finger protein ATL32 [Source:UniProtKB/Swiss-Prot;Acc:Q8W571]	ATL32_ARATH	1.19e-15
TRINITY_DN11135_c0_g1_i14.p1	35.09	35.79	45.62	30.29	52.13	49.24	35.74	73.95	64.2	48.78	54.24	73.21	65.89	64.48	76.56	90.17	68.38	71.97	71.7	56.99	60.2	AT4G24740.4	8.15e-124	Serine/threonine-protein kinase AFC2 [Source:UniProtKB/Swiss-Prot;Acc:P51567]	AFC2_ARATH	1.31e-121
TRINITY_DN11135_c0_g1_i19.p1	21.71	11.73	16.81	12.31	27.03	28.02	16.17	31.02	33.46	27.64	35.25	35.52	22.24	28.42	31.31	31.12	32.51	23.58	30.56	33.8	29.43	AT4G24740.5	6.2e-117	Serine/threonine-protein kinase AFC2 [Source:UniProtKB/Swiss-Prot;Acc:P51567]	AFC2_ARATH	2.87e-113
TRINITY_DN11135_c0_g1_i25.p1	40.2	67.91	64.73	56.46	66.69	59.94	62.31	71.82	95.22	61.53	76.13	99.47	93.1	81.03	87.02	108.88	99.15	84.4	81.79	66.35	78.51	AT4G24740.8	2.47e-123	Serine/threonine-protein kinase AFC2 [Source:UniProtKB/Swiss-Prot;Acc:P51567]	AFC2_ARATH	8.79e-120
TRINITY_DN11135_c0_g1_i5.p1	20.52	11.63	15.55	28.63	21.85	19.88	22.56	20.98	30.69	10.15	3.56	23.92	16.2	28.51	22.66	40.11	33.91	45.06	37.59	23.12	26.39	AT4G24740.8	5.42e-83	Serine/threonine-protein kinase AFC2 [Source:UniProtKB/Swiss-Prot;Acc:P51567]	AFC2_ARATH	1.8e-78
TRINITY_DN11136_c0_g2_i12.p1	111.7	122.82	110.07	98.98	100.16	93.2	87.47	109.46	109	118.22	118.64	122.4	111.92	114.72	102.75	113.47	117.38	126.85	126.69	110.01	105.24	AT3G19810.2	1.38e-84		YCED1_ARATH	1.36e-83
TRINITY_DN11137_c0_g1_i6.p1	0.51	0.15	0.29	0	0.33	0	0.17	0.31	0.37	0	0	0	0	0	0.34	0	0.5	1.08	0.77	0.16	0	AT4G23160.2	3.99e-94		POLR1_ARATH	9.83e-81
TRINITY_DN111386_c0_g1_i1.p1	0	0.2	0.39	0.13	0.55	0.12	0.12	0.1	0.37	0.47	0.59	0.74	0.58	0.49	0.35	0.45	0.9	0.52	0.62	0.22	0.41	AT5G05810.1	6.41e-80	RING-H2 finger protein ATL43 [Source:UniProtKB/Swiss-Prot;Acc:Q5EAE9]	ATL43_ARATH	6.31e-79
TRINITY_DN11138_c0_g2_i7.p1	0.19	0.68	0.33	0.67	0	0	0.19	0.35	0.62	0.46	0.8	0.87	0.2	0.33	0.38	0.38	0	0.17	0	0	0.17
TRINITY_DN111392_c0_g1_i1.p1	18	21.32	19.8	15.86	20.94	24.51	24.08	27.65	27.99	19.84	18.36	19.57	23.05	27.29	51.68	34.41	33.85	30.12	47.88	49.52	52.36	AT2G19270.1	1.66e-44
TRINITY_DN1113_c1_g1_i3.p1	1.57	2.6	2.13	2.1	4.96	9.03	5.05	5.99	8.02	3.24	5.24	5.32	6.28	7.38	10.12	6.49	6.6	9.35	15.41	11.03	8.28	AT4G23180.1	9.66e-102	Cysteine-rich receptor-like protein kinase 10 [Source:UniProtKB/Swiss-Prot;Acc:Q8GYA4]	CRK10_ARATH	9.5e-101
TRINITY_DN1113_c3_g1_i1.p1	0	0	0	0	0	0	0	0	0.69	0	0	0	0	1.13	1.83	3.27	0	0	1.13	1.21	0.52	AT4G23160.2	9.06e-27		M240_ARATH	1.87e-23
TRINITY_DN1113_c3_g2_i1.p1	0.68	0.16	0.21	0	0	0.12	0.2	0.43	0.59	0.15	0.06	0	0.72	0.27	0.38	0.44	0.12	0	0	0.29	0.49	AT4G23160.2	7.75e-89		POLX_TOBAC	4.23e-121
TRINITY_DN111409_c0_g1_i1.p1	0	0	0.53	0	0	0.67	0	0.58	0	0	0	0	0	0	2.41	1.29	0	0	0	0	0	AT1G40390.1	1.73e-09
TRINITY_DN11140_c0_g1_i7.p1	86.15	93.83	88.21	67.35	81.13	79.82	81.57	76.3	78.3	85.48	73.6	82.16	85.15	77.14	49.39	48.47	47.41	51.87	41.06	39.97	38.99	AT1G29390.1	2.93e-63	Cold-regulated 413 inner membrane protein 2, chloroplastic [Source:UniProtKB/Swiss-Prot;Acc:F4I1G5]	CRIM2_ARATH	2.89e-62
TRINITY_DN111442_c0_g1_i1.p1	0	0	0	0	0	0	0	0	0	0	0	0	0	0	1.13	0	0	0	0	0	2.27				GUN4_HYPJE	3.28e-11
TRINITY_DN111445_c0_g2_i1.p1	1.3	0.17	0.16	1.08	0.18	0.57	0.19	0.68	1.41	0.6	0.2	0.34	0.96	0	0.19	0.37	0.55	0.51	0.67	0.54	0.66	AT2G18500.1	1.19e-08	Transcription repressor OFP7 [Source:UniProtKB/Swiss-Prot;Acc:Q9ZU65]	OFP7_ARATH	1.17e-07
TRINITY_DN11144_c0_g1_i1.p1	3738.77	4011.12	4338.03	4062.48	4053.87	4005.08	3886.19	3097.16	3874.19	4596.28	4685.34	3391.8	3707.15	3477.09	2114.93	2453.85	2820.22	2855.06	1809.88	2184.82	1896.54	AT3G08940.2	2.23e-165	Chlorophyll a-b binding protein CP29.2, chloroplastic [Source:UniProtKB/Swiss-Prot;Acc:Q9XF88]	CB4B_ARATH	2.19e-164
TRINITY_DN11144_c0_g1_i4.p1	189.63	240.22	214.05	172.32	218.18	244.87	227.99	177.88	191.01	212.46	299.49	139.22	234.5	216.74	115.77	150.93	153.14	162.19	98.1	105.24	68.1	AT3G08940.1	2.82e-78	Chlorophyll a-b binding protein CP29.2, chloroplastic [Source:UniProtKB/Swiss-Prot;Acc:Q9XF88]	CB4B_ARATH	9.08e-77
TRINITY_DN11144_c1_g1_i4.p1	2.96	2.87	2.49	2.13	2.68	3.16	2.66	3.65	4.39	2.81	2.8	3.8	2.43	2.86	4.62	3.22	6.66	5.02	7.88	4.86	4.75	AT1G78930.1	1.53e-170		MTEF6_ARATH	1.65e-28
TRINITY_DN11146_c0_g1_i3.p1	22.92	19.38	3.33	3.38	13.72	20.63	30.73	15.61	6.89	8.09	3.67	6.55	17.73	13.32	5.82	4.8	3.97	4.37	1.92	3.91	2.9	AT2G42380.2	3.28e-58	Basic leucine zipper 34 [Source:UniProtKB/Swiss-Prot;Acc:F4IN23]	BZP06_ORYSJ	3.11e-60
TRINITY_DN11146_c0_g1_i6.p1	16.47	12.49	1.09	0.18	1.67	6.65	7.9	2.91	1.03	1.8	0	0.73	0.98	1.36	0	0	0	0	0	0.15	0	AT2G42380.2	1.47e-69	Basic leucine zipper 34 [Source:UniProtKB/Swiss-Prot;Acc:F4IN23]	BZP34_ARATH	1.45e-68
TRINITY_DN11148_c0_g1_i10.p1	56.17	50.21	57.96	43.07	48.74	59.52	55.14	72.49	54.93	60.15	50.28	57.51	48.6	52.61	71.64	60.96	55.37	60.34	55.34	64.01	61.12	AT5G03290.1	0	Isocitrate dehydrogenase [NAD] catalytic subunit 5, mitochondrial [Source:UniProtKB/Swiss-Prot;Acc:Q945K7]	IDH5_ARATH	0
TRINITY_DN11149_c0_g1_i9.p1	56.91	44.43	41.36	38.11	70.94	52.66	52.66	53.18	52.43	61.26	50.81	95.82	66.38	59.22	71.32	85.72	127.28	130.97	133.58	93.87	69.39	AT4G28400.1	5.84e-137	Probable protein phosphatase 2C 58 [Source:UniProtKB/Swiss-Prot;Acc:Q93YW5]	P2C58_ARATH	5.74e-136
TRINITY_DN1114_c0_g1_i1.p1	10.28	7.05	3.96	4.1	5.38	6.48	9.07	10.51	6.43	6.22	7.31	7.58	9.13	9.82	11.83	9.18	9.58	10.3	12.35	10.18	9.34	AT2G06000.2	4.34e-146	Pentatricopeptide repeat-containing protein At2g06000 [Source:UniProtKB/Swiss-Prot;Acc:Q9ZUE9]	PP149_ARATH	4.27e-145
TRINITY_DN111500_c0_g1_i2.p1	0.15	0.27	0.13	0	0	0.31	0	0	0.33	0	0	0.56	0.16	0.52	0.15	0.15	0	0	0.14	0.44	0				YI31B_YEAST	5.77e-52
TRINITY_DN11150_c0_g1_i3.p1	32.3	32.83	31.47	23.54	33.65	34.77	28.38	40.51	42.92	42.09	38.37	41.32	33.78	35.05	20.8	23.51	25.37	37.38	27.12	22.36	23.9	AT2G34770.1	1.28e-133	Dihydroceramide fatty acyl 2-hydroxylase FAH1 [Source:UniProtKB/Swiss-Prot;Acc:O48916]	FAH1_ARATH	1.26e-132
TRINITY_DN11150_c0_g1_i4.p1	1.98	0	0.55	1.99	1.7	0	1.12	2.59	2.64	1.61	0	0	1.18	0.61	0.58	1.28	0.56	1.04	0.64	0	1.29	AT2G34770.1	2.21e-78	Dihydroceramide fatty acyl 2-hydroxylase FAH1 [Source:UniProtKB/Swiss-Prot;Acc:O48916]	FAH1_ARATH	2.17e-77
TRINITY_DN11152_c0_g1_i3.p1	0	0	0	0	0	0	0	0	0	0	0	0	0.65	0.53	0	0	0	0	0	0	0
TRINITY_DN11152_c0_g2_i7.p1	0.95	0	0	0	0.46	0	0	0.45	0	0	1.07	0	0	0.42	0	0.98	0	0	0.86	0.92	1.21	AT5G45400.1	4.57e-07	Replication protein A 70 kDa DNA-binding subunit C [Source:UniProtKB/Swiss-Prot;Acc:Q9FHJ6]	RFA1B_ORYSJ	2.4e-08
TRINITY_DN11153_c0_g1_i1.p1	4.96	5.15	5.01	2.2	4.67	4.52	4.25	7.33	5.7	4.4	4.95	6.56	6.13	5.08	7.21	7.64	5.84	8.28	8.6	5.83	8.12	AT4G36050.5	3.61e-171	DNA-(apurinic or apyrimidinic site) lyase 2 [Source:UniProtKB/Swiss-Prot;Acc:F4JNY0]	APE2_ARATH	4.46e-170
TRINITY_DN111553_c0_g1_i1.p1	0	0.25	0.24	0	0	0.58	0.29	0	0	0	0	0	0	0.24	0	0	0.81	0	0	0	0	ATMG00860.1	2.1e-19	Uncharacterized mitochondrial protein AtMg00860 [Source:UniProtKB/Swiss-Prot;Acc:P92523]	POL3_DROME	4.23e-42
TRINITY_DN11155_c0_g1_i1.p1	36.4	28.93	28.72	20.81	35.66	40.32	38.49	40.17	36.14	31.19	30.36	33.99	39.31	38.92	46.18	35.67	36.88	39.65	52.44	49.42	48.56	AT2G17410.1	3.3e-129	AT-rich interactive domain-containing protein 3 [Source:UniProtKB/Swiss-Prot;Acc:Q940Y3]	ARID3_ARATH	3.24e-128
TRINITY_DN11155_c0_g2_i1.p1	1.53	1.03	2.18	1.67	1.99	2.47	3.09	3.21	4.18	3.9	1.58	3.45	3.02	3.62	3.84	4.88	3.98	4.84	4.65	3.31	4.95	ATMG01360.1	0	Cytochrome c oxidase subunit 1 [Source:UniProtKB/Swiss-Prot;Acc:P60620]	COX1_BETVU	0
TRINITY_DN11157_c0_g2_i1.p1	1.29	3.48	0.89	1.83	4.74	7.26	4	3.11	1.41	6.21	0	2.12	1.35	2.03	4.66	2.34	2.29	3.75	12.41	10.49	10.19
TRINITY_DN11158_c0_g2_i1.p1	20.01	11.83	24.21	22.53	24.49	18.15	16.49	20.91	24.97	26.73	21.94	31.52	16.02	20.39	22.39	24.26	27.99	27.98	30.56	36.65	26.39	AT2G20390.1	3.46e-64
TRINITY_DN11159_c0_g1_i2.p1	26.57	27.73	25.97	23.49	24	21.63	18.57	21.25	25.9	25.08	25.1	27.6	24.42	21.58	14.42	17.77	20.22	21.07	20.99	14.41	21.72	AT5G51330.1	2.27e-38	Protein DYAD [Source:UniProtKB/Swiss-Prot;Acc:Q9FGN8]	DYAD_ARATH	2.62e-37
TRINITY_DN11159_c0_g1_i5.p1	0.55	0.76	1.08	0	1.99	0	0.59	0.72	0	1.57	3.03	3.98	4.23	1.67	1.35	1.3	2.09	1.14	3.65	5.01	0.64	AT5G51330.1	2.89e-38	Protein DYAD [Source:UniProtKB/Swiss-Prot;Acc:Q9FGN8]	DYAD_ARATH	2.84e-37
TRINITY_DN11159_c1_g1_i1.p1	11.08	8.73	8.1	5.32	6.97	7.6	7.87	9.12	10.48	10.64	10.05	8.02	9.32	10.93	8.82	11.99	14.99	12.76	14.82	10.04	7.15	AT1G80490.3	0	Topless-related protein 1 [Source:UniProtKB/Swiss-Prot;Acc:Q0WV90]	TPR2_ORYSJ	0
TRINITY_DN1115_c0_g3_i1.p1	64.93	61.16	71.76	57.93	61.3	55.86	55.2	74.7	74.1	89.85	90.29	82.92	85.52	82.26	71.23	73.56	82.09	90.19	70.62	62.72	57.71	AT1G12050.1	0		FAH_ARATH	0
TRINITY_DN111609_c0_g1_i1.p1	0	0	0	0	0	0	0.6	0	0	0	0	0	0	0	0	0	0	0	0	0	0	AT3G02100.1	5.59e-33	UDP-glycosyltransferase 83A1 [Source:UniProtKB/Swiss-Prot;Acc:Q9SGA8]	U83A1_ARATH	5.5e-32
TRINITY_DN11164_c1_g1_i3.p1	2.82	1.82	2.22	1.85	2.2	1.99	2.79	3.2	2.48	1.99	3.58	3.02	3.47	3.64	3.05	3.32	2.94	3.76	4.23	2.33	1.96	AT3G21480.1	2.71e-63		PAXI1_MOUSE	8.85e-28
TRINITY_DN111659_c0_g3_i1.p1	1.56	1.1	0.94	0.65	1.25	0.88	0.52	1.59	1.26	0.75	0.62	1.51	2.41	1.29	0.49	0.47	1.41	0.95	1.26	0.42	0.39	AT3G58770.1	3.8e-10
TRINITY_DN11168_c0_g2_i1.p1	20.99	22.14	24.91	13.24	19.22	24.4	19.96	22.18	28.68	18.75	27.21	24.73	27.53	25.22	40.94	30.77	33.94	39.43	33.77	34.46	45.54	AT5G02770.1	8.57e-32	Protein MODIFIER OF SNC1 11 [Source:UniProtKB/Swiss-Prot;Acc:Q9LZ08]	MOS11_ARATH	8.43e-31
TRINITY_DN11169_c0_g1_i1.p1	17.34	10.3	9.49	9.5	14.53	10.88	15.28	12.4	13.85	14.84	16.03	18.31	17.65	14.65	24.63	22.33	24.95	18.43	27.22	20.31	23.41	AT1G04080.4	3.87e-72		PR39A_ARATH	3.8e-71
TRINITY_DN11169_c0_g4_i1.p1	9.29	8.28	7.83	4.34	5.97	4.96	5.39	11.83	10.76	5.72	6	8.1	8.9	9.9	10.89	13.41	10	9.99	13.63	9.41	12.39	AT2G17970.1	7.75e-171		AKB9B_ARATH	7.62e-170
TRINITY_DN1116_c0_g1_i1.p1	1.19	1.31	2.24	1.53	2.2	2.43	1.64	2.69	3.67	3.48	4.09	4.22	4.2	3.18	4.53	5.03	5.66	4.39	4.77	4.53	4.03	AT1G33360.1	0	CLP protease regulatory subunit CLPX3, mitochondrial [Source:UniProtKB/Swiss-Prot;Acc:Q66GN9]	CLPX3_ARATH	0
TRINITY_DN1116_c0_g1_i11.p1	13.94	16.77	11.2	12.85	9.5	15.96	13.3	25.28	17.4	22.19	23.55	26.28	27.14	22.78	27.59	15.81	26.58	19.33	26.57	32.81	30.79	AT4G32660.4	3.65e-77	Serine/threonine-protein kinase AFC3 [Source:UniProtKB/Swiss-Prot;Acc:P51568]	AFC3_ARATH	6.16e-75
TRINITY_DN1116_c0_g1_i8.p1	8.11	8.42	9.36	6.29	9.26	6.46	6.03	8.91	9.1	8.43	11.31	10.36	9.33	8.71	7.19	13.05	13.82	13.28	9.32	5.05	5.81	AT1G33360.1	0	CLP protease regulatory subunit CLPX3, mitochondrial [Source:UniProtKB/Swiss-Prot;Acc:Q66GN9]	CLPX3_ARATH	0
TRINITY_DN111701_c0_g1_i1.p1	0	0.12	0	0	0.52	0	0	0	0.15	0.55	0.42	0	0.14	0	0	0	0	0	0	0	0	AT1G49760.1	8.39e-159	Polyadenylate-binding protein 8 [Source:UniProtKB/Swiss-Prot;Acc:Q9FXA2]	PABPA_XENLA	0
TRINITY_DN111713_c0_g1_i1.p1	0.9	0	0	0	0	0	0	0	0	0	0	0	0	0	0	0	0	0	0	0	0	AT3G44680.1	8.33e-107	Histone deacetylase 9 [Source:UniProtKB/Swiss-Prot;Acc:Q8H0W2]	HDA9_ARATH	8.19e-106
TRINITY_DN111718_c0_g1_i3.p1	1.79	2.24	1.53	0	0.58	0	0	1.69	0	1.38	0	0	1.32	0	0.58	0.62	1.76	0	0.54	0	0.5
TRINITY_DN11171_c0_g1_i6.p1	0	0.18	0.34	0	0	0	0	0	0	0	0.21	0	0	0.17	0	0.2	0.19	0	0.18	0	0	AT4G23160.2	5.96e-78		POLR1_ARATH	8.93e-69
TRINITY_DN11172_c0_g2_i1.p1	0	0	0	0	0	0.27	0.54	0.24	0.28	0	0	0.24	0	0.46	0	0.26	0	0	0.47	0.51	0.46				R1A_SOLDE	6.25e-14
TRINITY_DN11172_c0_g2_i3.p1	0.54	1.01	0.46	0.65	1.05	1.17	0.58	0.51	1.19	1.26	2.47	1.89	1.18	1.45	0.53	0.56	0	0.49	1.47	1.04	1.36				R1B8_SOLDE	2.61e-13
TRINITY_DN11173_c0_g1_i1.p1	1.76	1.22	0	0	0.43	0	0.93	0	0	0	0.49	0.39	0	0	0	0	0	0	0.8	0	1.12	AT4G19110.3	1.21e-29		CDKF4_ORYSJ	6.6e-24
TRINITY_DN11173_c0_g1_i3.p1	0	0	0.12	0	0.26	0.14	0	0.25	0	0.11	0.14	0.76	0	0.12	0.96	0.81	0.94	1.49	1.73	2.11	1.46	AT4G19110.1	1.49e-91		CDKF4_ORYSJ	3.44e-82
TRINITY_DN111758_c0_g1_i1.p1	0	0	0	0.79	0	0	0	0	0.73	0	0.36	0	0	0.29	0	0	0	0	0	0.97	0.29
TRINITY_DN111767_c0_g1_i1.p1	0	0.19	0	0	0	0	0.22	0	0	0.17	0	0	0	0.19	0	0	0	0	0	0	0	AT3G18370.1	2.69e-71		RASL2_MOUSE	9.61e-13
TRINITY_DN111770_c0_g1_i1.p1	0	0	0	0	0	0	0	0	0	0	0	0	0	0	0	0	0	0.94	0.23	0.5	0
TRINITY_DN11177_c0_g1_i1.p1	4.76	5.76	2.74	7.15	6.45	4.34	4.62	5.9	4.16	4.55	6.91	4.59	7.04	6.41	6.03	6.43	5.31	9.79	4.03	3.69	5.79	AT3G12530.1	1.58e-94	DNA replication complex GINS protein PSF2 [Source:UniProtKB/Swiss-Prot;Acc:Q9C7A8]	PSF2_ARATH	1.55e-93
TRINITY_DN11178_c0_g1_i1.p1	1.54	0.84	2.66	2.19	2.38	1.94	1.6	1.71	1.68	2.95	1.67	1.39	3.89	3.51	2.46	3.42	4.54	1.12	3.63	3.27	1.07	AT3G55370.1	1.28e-13	Dof zinc finger protein DOF3.6 [Source:UniProtKB/Swiss-Prot;Acc:Q9M2U1]	DOF36_ARATH	1.26e-12
TRINITY_DN11179_c1_g2_i1.p1	2.66	2.05	3.44	2.66	1.3	2.38	0.47	2.08	1.47	2.79	1.49	3.94	2.87	2.37	5.28	3.65	4.38	4.82	4.03	0.86	1.89
TRINITY_DN11179_c1_g3_i1.p1	3.85	3.13	0	0.58	1.88	1.04	1.53	1.36	1.06	0.38	3.27	0.85	2.09	2.15	0.95	0.99	2.85	0.87	0.44	0	0
TRINITY_DN11179_c1_g3_i1.p2	1.76	1.1	2.52	2.85	1.72	2.56	0.63	1.66	3.9	0.91	1.36	3.06	1.94	2.65	0.58	2.46	4.63	1.59	2.13	0.57	0
TRINITY_DN1117_c0_g1_i15.p1	10.53	7.37	5.11	4.63	6.41	4.33	5.6	6.6	7.49	7.42	4.28	4.53	7.89	4.52	4.81	4.19	6.68	7.36	4.77	3.6	4.48	AT1G51940.1	3.35e-109	LysM domain receptor-like kinase 3 [Source:UniProtKB/Swiss-Prot;Acc:F4IB81]	LYK3_ARATH	3.3e-108
TRINITY_DN111807_c0_g1_i1.p1	0.25	0	0	0	0	0	0	0.23	0	0	0	0	0	0	0.25	0	0	0	0	0	0	AT3G13580.5	1.11e-119	60S ribosomal protein L7-4 [Source:UniProtKB/Swiss-Prot;Acc:Q9LHP1]	RL74_ARATH	1.1e-118
TRINITY_DN11180_c0_g1_i11.p1	13.65	12.89	12.56	15.07	25.51	11.75	12.59	13.79	17.54	26.6	21.71	26.32	18.2	14.07	20.62	16.55	25.66	18.97	28.04	19.64	19.27	AT5G25280.2	1.51e-43
TRINITY_DN11180_c0_g1_i4.p1	2.93	1.3	1.11	1.28	2.46	3.2	3.74	2.19	1.78	3.25	1.35	1.51	6.8	2.05	4.06	1.64	0.54	0.66	1.66	4.07	5.03	AT1G65430.1	8.63e-50	Probable E3 ubiquitin-protein ligase ARI8 [Source:UniProtKB/Swiss-Prot;Acc:Q8W468]	ARI8_ARATH	8.49e-49
TRINITY_DN11180_c0_g2_i1.p1	0.38	1.18	0.16	1.11	2.19	1.76	1.55	3.5	1.85	1.23	0.4	3.14	5.69	2.13	8.22	4.35	2.98	1.55	4.3	6.05	4.37
TRINITY_DN111812_c0_g1_i1.p1	5.83	4.24	5.27	3.71	5.58	5.03	5.08	5.03	7.12	4.78	6.6	5.15	5.51	4.64	6.19	5.14	5.85	8.05	8.77	7.02	4.2	AT5G45540.1	1.13e-76
TRINITY_DN11181_c0_g1_i2.p1	1.11	1.09	0.92	1.23	1.02	1.45	1.35	1.23	1.29	1.14	0.81	0.96	1.31	1.22	1.27	2.09	1.23	1.05	1.01	0.27	0.34	AT4G23160.2	2.88e-121		POLX_TOBAC	4.44e-164
TRINITY_DN11181_c0_g2_i3.p1	1.73	1.21	0.22	0.7	0.66	1.14	0.35	0.63	0.56	0.71	0.8	0.81	0.53	0.81	0.7	0.77	1.02	0.55	1.02	0.17	0.31	AT4G23160.2	7.13e-122		POLR1_ARATH	3.61e-146
TRINITY_DN11181_c1_g1_i1.p1	0.43	0.63	0.12	0.17	0.27	0	0.14	0	0.15	0	0.15	0	0	0.37	0.14	0.14	0.28	0.13	0.13	0	0.13	AT5G48050.1	3.85e-09		POLR1_ARATH	3.23e-08
TRINITY_DN11181_c2_g1_i2.p1	0.16	0.44	0.71	0.19	0.16	0	0	0.45	0.71	0.4	0.35	0.3	0.85	0.57	0.66	0.98	0.48	0.6	1.04	0.63	0	AT4G23160.2	2.02e-74		POLR1_ARATH	5.03e-95
TRINITY_DN11182_c0_g1_i1.p1	111.33	92.15	110.58	90.75	91.41	98.51	85.74	97.68	88.28	113.11	122.4	92.8	104.56	91.92	68.18	75.76	67.97	80.47	67.14	76.6	73.2	AT3G14930.1	0	Uroporphyrinogen decarboxylase 1, chloroplastic [Source:UniProtKB/Swiss-Prot;Acc:Q93ZB6]	DCUP1_ARATH	0
TRINITY_DN11183_c0_g1_i1.p1	14.36	11.92	18.72	12.51	13.78	16.09	15.64	18.43	26.23	15.21	19.91	18	18.22	20.42	30.15	27.07	24.77	22.2	31.52	29.13	31.83	AT5G45360.1	7.55e-111	F-box protein SKIP31 [Source:UniProtKB/Swiss-Prot;Acc:Q9FHK0]	SKI31_ARATH	7.43e-110
TRINITY_DN11183_c1_g1_i4.p1	1.88	2.87	5.2	5.82	5.41	3.58	3.68	3.22	4.06	9.79	9.78	9.3	4.74	5.16	2.79	8.67	13.64	17.54	7.71	3.99	2.35
TRINITY_DN11184_c0_g1_i13.p1	3.74	3.84	2.99	2.37	4.38	6.12	3.6	4.45	2.73	7.91	5.17	10.19	6.99	5.82	9.1	5.37	5.78	7.65	8.47	10.58	11.36	AT4G32140.1	7.5e-122		YMB8_YEAST	5.01e-29
TRINITY_DN11184_c0_g3_i2.p1	4.81	3.36	4.61	2.03	2.32	5.56	3.3	5.93	4.54	4.7	4.02	4.12	6.43	6.05	6.96	5.1	6.04	5.43	14.52	13.16	6.63	AT4G32140.1	2.26e-69
TRINITY_DN111855_c0_g1_i1.p1	0	0	0	0	0	0	0	0	0	0	0	0.66	0.39	0	0	0	0	0	0.34	0.36	0.32
TRINITY_DN11185_c0_g1_i1.p2	2.13	0	0	0	1.04	0	1.14	2.51	0	0.83	3.04	0	0.58	0.96	0	0.55	0	1.92	2.42	1.55	0.45
TRINITY_DN11185_c0_g1_i9.p1	0.74	0.44	1.28	1.74	0.24	0.77	1.27	1.6	0.54	1.39	0	0.9	1.03	0.86	0.25	0.25	0.49	0.9	0.67	0.24	0.22	AT3G02100.1	7.58e-65	UDP-glycosyltransferase 83A1 [Source:UniProtKB/Swiss-Prot;Acc:Q9SGA8]	U83A1_ARATH	7.46e-64
TRINITY_DN11185_c0_g2_i1.p1	0.22	0.2	0.58	0	0.43	0.69	0.46	2.26	0.48	0.36	0	0.81	0.46	0.39	0.45	0.22	0.87	1.01	1.61	0.65	0.39
TRINITY_DN111867_c0_g1_i1.p1	1.05	0.32	0	0	0	1.11	0.37	0.33	0	0.28	0	0	0.37	0.31	0	0	0	0.32	0	0	0	AT5G35870.1	3.01e-08
TRINITY_DN11186_c1_g1_i2.p1	6.19	4.86	7.01	4.84	6.26	6.19	7.75	8.05	10.82	8.08	11.46	8.06	10	9.36	11.4	7	8.4	10.14	13.15	10.55	10.1	AT5G15080.1	1.32e-176	Probable receptor-like protein kinase At5g15080 [Source:UniProtKB/Swiss-Prot;Acc:Q9LFP7]	PBL34_ARATH	1.3e-175
TRINITY_DN11186_c1_g3_i1.p1	2.2	1.13	1.58	1.06	1.23	0.28	0.37	1.51	2.76	3.74	5.58	2.39	2.61	1.41	1.58	2.52	3.59	4.08	2.57	1.59	2.55	AT1G09300.1	0		ICP55_ARATH	0
TRINITY_DN11188_c0_g2_i5.p1	0.92	1.11	3.19	2.91	1.49	3.23	1.92	1.71	2.69	3.44	4.01	4.45	5.52	3.24	0.92	0	3.33	3.91	0.56	0.89	0.8	AT3G30380.2	6.44e-57		AB17A_HUMAN	1.73e-22
TRINITY_DN11189_c0_g2_i4.p1	9.03	8.38	8.05	5.57	6.4	6.34	7.28	8.94	10.31	8.3	9.14	9.22	9.08	9.4	11.05	13.73	12.43	10.41	12.72	7.92	8.58	AT3G46510.1	0	U-box domain-containing protein 13 [Source:UniProtKB/Swiss-Prot;Acc:Q9SNC6]	PUB13_ARATH	0
TRINITY_DN1118_c0_g3_i2.p1	3.53	3.61	1.76	1.13	2	1.44	2.35	2.84	2.18	1.96	2.71	2.46	2.03	2.55	1.27	1.59	2.39	1.88	1.66	1.4	1.31	AT3G58650.1	9.67e-84
TRINITY_DN1118_c0_g5_i1.p1	0	0.79	0.64	1.25	1.13	1.74	2.08	0	0.28	0	0	1.04	1.69	0.28	0.75	0.2	0	1.46	0.59	0	1.14	AT5G26910.3	6.91e-24
TRINITY_DN11192_c0_g2_i1.p1	4.54	4.16	3.95	2.46	3.68	4.58	4.61	6.68	6.84	4.94	4.33	4.19	6.96	6.43	15.82	10.06	9.02	8.01	16.22	9.44	8.22	AT2G39580.2	4.46e-167
TRINITY_DN11193_c0_g3_i1.p1	21.02	28.29	31.53	26.22	22.82	25.41	22.03	41.25	54.56	46.5	44.75	48.39	32.65	39.35	49.39	42.28	56.98	48.02	42.5	63.09	63.2	AT4G29070.2	6.85e-78
TRINITY_DN11193_c0_g5_i1.p1	2.33	1.3	2.97	1.71	1.53	1.87	1.86	3.37	2.52	3.29	1.66	3.07	2.63	3.79	5.21	5.57	5.17	4.46	5.66	5.21	6.36	AT2G19640.2	1.29e-114	Histone-lysine N-methyltransferase ASHR2 [Source:UniProtKB/Swiss-Prot;Acc:Q9ZUM9]	ASHR2_ARATH	1.27e-113
TRINITY_DN111940_c0_g1_i1.p1	0.55	0.42	0.14	0.27	0.45	0.64	0.16	0.22	0.17	0.71	0.57	0.37	0.56	0.2	0	0	0.23	0.14	0	0	0	AT2G43990.1	3.28e-15
TRINITY_DN111945_c0_g1_i2.p1	0	0	0	0	0	0	0	0.99	0	0	0	0	0	0	0.71	0.36	0.7	0	1.61	0.68	0.31	AT4G23160.2	1.11e-38		POLX_TOBAC	4.18e-40
TRINITY_DN111945_c1_g1_i1.p1	0	0	0	0	1.24	0	0.68	0	0	0	0	0	0	0	0	0	0	0	0	0	0	ATMG00820.1	1.35e-11	Uncharacterized mitochondrial protein AtMg00820 [Source:UniProtKB/Swiss-Prot;Acc:P92520]	M820_ARATH	1.33e-10
TRINITY_DN11195_c0_g1_i5.p1	278.28	428.29	442.31	247.11	150.63	160.26	245.7	423.45	480.13	619.09	459.01	513.87	395.75	511.66	661.97	950.04	1111.04	878.92	403	300.78	376.79	AT4G16730.1	1.34e-97		TPS4_CANOD	0
TRINITY_DN11195_c1_g1_i7.p1	0	0.33	0.3	0.41	0.22	0.16	0	0	0	0.26	0.19	0.36	0.52	0	0.5	0.18	0	0.3	0.76	0.93	0.37
TRINITY_DN11195_c2_g1_i1.p1	0	0.26	0	0	0	0.61	0	0.27	0	0	0	0.26	0	0	0	0	0	0.26	0.53	0	0	AT2G01050.1	3.84e-07
TRINITY_DN11198_c0_g1_i3.p1	0.21	0	0.52	0.17	0.29	0.31	0	0.19	0.34	0.26	0.51	0.36	0.87	0.24	0.51	0.86	0	1.01	0.24	0.24	0.2
TRINITY_DN11198_c0_g1_i7.p1	0.67	1.35	0.87	0.34	2.08	0.97	0.88	1.86	1.03	1.51	0.91	1.35	1.67	1.13	3.29	2.33	0.42	1.29	1.89	2.12	1.76
TRINITY_DN11198_c0_g1_i8.p1	0.32	0.2	0	0	0	0.23	0	0.85	0.77	0	0.65	0.8	0	0.85	0	0.81	1.8	0.1	0.56	0.18	0.27
TRINITY_DN11198_c4_g1_i2.p1	3.63	3.39	2.23	0.63	4.05	4.49	1.11	0	0.57	4.44	2.37	0.91	1.13	2.79	1.53	2.69	4.09	2.81	2.35	1.51	1.75
TRINITY_DN1119_c0_g1_i1.p1	5.23	3.07	9.3	2.91	7.74	5.49	3.2	6	7.73	6.14	8.69	7.79	7.46	5.39	8	10.9	8.79	9.77	8.37	7.44	6.96	AT3G25040.1	4.05e-129	ER lumen protein-retaining receptor B [Source:UniProtKB/Swiss-Prot;Acc:Q8VWI1]	ERD2_PETHY	2.3e-133
TRINITY_DN1119_c0_g3_i2.p1	7.5	8.52	8.46	6.16	8.89	11.22	11.48	14.49	10.9	9.09	12.84	10.27	11.99	16.49	21.52	20.94	12.26	11.46	18.66	15.09	25.43	AT1G07930.1	0	Elongation factor 1-alpha 2 [Source:UniProtKB/Swiss-Prot;Acc:Q8W4H7]	EF1A_MANES	0
TRINITY_DN1119_c0_g3_i7.p2	18.83	17.18	15.1	10.31	17.92	16.29	17.25	16.69	12.13	16.14	17.39	15.19	17.76	18.49	15.15	14.67	15.39	18.04	25.47	21.79	25.08	AT3G25040.1	6.54e-109	ER lumen protein-retaining receptor B [Source:UniProtKB/Swiss-Prot;Acc:Q8VWI1]	ERD2B_ARATH	6.43e-108
TRINITY_DN111_c0_g1_i12.p1	5.6	4.52	4.19	2.43	3.92	2.99	3.7	5.5	6.35	3.46	4.92	4.18	4.62	4.96	6.01	6.25	4.81	5.17	9.71	10.22	7.21	AT4G31670.1	0	Ubiquitin carboxyl-terminal hydrolase 18 [Source:UniProtKB/Swiss-Prot;Acc:Q67XW5]	UBP18_ARATH	0
TRINITY_DN111_c0_g1_i4.p1	19.56	10.08	9.81	9.15	17.53	17.31	14.26	14.02	10.05	12.98	13.36	15.29	10.55	15.34	17.96	10.06	12.53	13.12	22.72	31.21	43.38	AT4G31670.1	1.13e-09	Ubiquitin carboxyl-terminal hydrolase 18 [Source:UniProtKB/Swiss-Prot;Acc:Q67XW5]	UBP18_ARATH	1.11e-08
TRINITY_DN111_c1_g1_i1.p1	12.85	13.03	15.29	11.98	15.88	16.16	13.34	20.43	24.57	16.76	20.46	25.17	23.55	18.01	30.97	20.81	22.75	23.95	50.02	34.89	28.43	AT5G47750.1	0	Serine/threonine-protein kinase D6PKL2 [Source:UniProtKB/Swiss-Prot;Acc:Q39183]	D6KL2_ARATH	0
TRINITY_DN111_c1_g1_i3.p1	51.03	31.77	33.26	23.38	42.02	40.68	40.17	36.8	48.44	39.71	35.89	53.84	43.97	44.64	36.86	55.95	52.19	58.75	70.36	45.86	45.15	AT5G47750.1	0	Serine/threonine-protein kinase D6PKL2 [Source:UniProtKB/Swiss-Prot;Acc:Q39183]	D6KL2_ARATH	0
TRINITY_DN112009_c0_g1_i1.p1	0.44	0.13	0.5	0.68	0.14	1.19	0.15	0.4	0.47	0.59	0.76	0	0	0.25	0	0	0.43	0	0	0	0	AT1G13920.1	1.17e-13
TRINITY_DN11204_c0_g1_i6.p1	7.06	7.97	7.45	7.07	6.14	6.25	4.48	15.29	9.49	6.21	8.21	12.55	6.53	4.74	11.55	12.65	11.69	11.3	9.03	13.02	8.34	AT1G72050.1	3.07e-75	Transcription factor IIIA [Source:UniProtKB/Swiss-Prot;Acc:Q84MZ4]	TF3A_ARATH	2.07e-73
TRINITY_DN11204_c0_g1_i7.p1	2.13	0.48	0.39	0	1.24	0	0.4	0.45	0	0.42	0	1.66	0.42	0.33	1.29	1.38	1.51	1.36	1.72	0.52	0	AT1G72050.1	1.36e-42	Transcription factor IIIA [Source:UniProtKB/Swiss-Prot;Acc:Q84MZ4]	TF3A_ARATH	6.73e-41
TRINITY_DN112082_c1_g1_i1.p2	0	0	0	0	0	0	0	0	0	0	0	0	0	0	0	0	0	0	0.4	0	0	AT5G48050.1	2.22e-06		POLR1_ARATH	3.39e-27
TRINITY_DN112082_c3_g1_i1.p1	0	0	0.28	0	0	0	0.34	0	0	0	0	0.29	0.34	0	0	0	0	0	0	0.62	0.28	AT4G02250.1	3.38e-15		PMEI_ACTDE	9.04e-07
TRINITY_DN112095_c0_g1_i1.p1	0	0	0	0	0	0	0	0	0	0	0	0	0	0	0.23	0	0.23	0	0.42	0	2.03	AT3G11940.2	1.5e-108	40S ribosomal protein S5-2 [Source:UniProtKB/Swiss-Prot;Acc:P51427]	RS5_NEUCR	8.69e-139
TRINITY_DN1120_c0_g1_i1.p1	11.7	9.63	7.49	4.38	3.88	5.72	10.03	10.73	13.08	5.13	5.25	6.06	10.57	12.18	15.6	16.53	8.95	7.61	7.93	9.59	12.71	AT1G20640.1	0	Protein NLP4 [Source:UniProtKB/Swiss-Prot;Acc:Q9LE38]	NLP4_ARATH	0
TRINITY_DN1120_c0_g1_i2.p1	1.68	3.76	2.74	2.04	2.47	2.76	2.75	5.64	4.21	3.83	3.65	3.65	3.74	4.69	7.98	6.53	5.53	5.65	8.77	7.09	7.24	AT1G76350.2	0	Protein NLP5 [Source:UniProtKB/Swiss-Prot;Acc:Q9SFW8]	NLP5_ARATH	0
TRINITY_DN11211_c0_g1_i2.p1	0	0.54	0.55	0	0.67	0.75	0	1.15	0	0.66	0	0	0.63	0	0	0	0.56	1.6	0.56	1.3	0
TRINITY_DN11211_c0_g2_i1.p1	3.84	4.69	6.79	4.03	5.22	2.46	4.76	6.5	9.22	5.47	5.36	6.87	3.35	6.83	7.13	4.24	6.56	8.43	10.06	8.53	6.44	AT4G32560.4	2.47e-68		CCD93_CHICK	3.27e-24
TRINITY_DN11211_c1_g1_i3.p1	0.94	0.57	0.54	1.48	0.3	0.33	0.65	0.58	0.68	0	0	0.85	0.66	0.27	0.94	0	0.92	1.42	0.57	0	1.09	AT2G26910.1	5.89e-76	ABC transporter G family member 32 [Source:UniProtKB/Swiss-Prot;Acc:O81016]	AB31G_ORYSJ	5.53e-77
TRINITY_DN11212_c0_g1_i3.p1	102.6	109.57	122.95	93.22	115.2	119.51	113.65	131.52	127.75	143.22	150.77	132.56	135.26	129.53	116.18	111.93	117.48	124.79	100.87	103.53	90.71	AT1G02560.1	2.07e-153	ATP-dependent Clp protease proteolytic subunit 5, chloroplastic [Source:UniProtKB/Swiss-Prot;Acc:Q9S834]	CLPP5_ARATH	2.03e-152
TRINITY_DN11212_c0_g1_i9.p1	0.44	0	0	0.95	0	0	0	0	0	0.36	0	0	0	0	0	0	0.45	0.39	0	0	0	AT1G02560.1	4.71e-65	ATP-dependent Clp protease proteolytic subunit 5, chloroplastic [Source:UniProtKB/Swiss-Prot;Acc:Q9S834]	CLPP5_ARATH	4.63e-64
TRINITY_DN112134_c0_g1_i1.p1	1.22	0	0	0	0.79	0	1.29	0.38	0.45	0	0	0	0.87	0	0	0.42	0	0	0	0	0				POLR1_ARATH	5.52e-12
TRINITY_DN112140_c0_g1_i2.p1	0	0	0	0.21	0.17	0	0	0	0	0	0	0	0	0	0.55	0.18	0.71	0	0	0	0	AT4G20860.1	2.1e-106		BBE22_ARATH	2.07e-105
TRINITY_DN11215_c0_g1_i1.p1	8.45	8.61	6.58	4.02	6.73	7.8	8.28	11.24	9.92	9.16	7.29	8.52	12.89	11.44	20.32	14.63	13.75	13.18	22.22	9.56	8.4	AT2G26890.1	0	DnaJ homolog subfamily C GRV2 [Source:UniProtKB/Swiss-Prot;Acc:F4IVL6]	GRV2_ARATH	0
TRINITY_DN112161_c1_g1_i1.p1	0	0	0	0	0	0	0	0	0	0	0	0	0	0	0	0	0	0	0	0	1.75	AT5G12030.1	5.75e-08	17.7 kDa class II heat shock protein [Source:UniProtKB/Swiss-Prot;Acc:O81822]	AACUJ_ASPA1	5.7e-36
TRINITY_DN112176_c1_g1_i2.p1	56.61	66.23	107.32	85.89	79.08	62.37	94.1	102.4	130.7	81.77	127.43	116.48	84.89	95.6	250.5	156.28	182.52	166.76	125.28	125.89	142.27
TRINITY_DN11217_c0_g1_i1.p1	0	0	0	0	0	0	0	0	0	0	0	0	0.94	0	0.86	0	0	0	0	0	0
TRINITY_DN11217_c0_g2_i1.p1	0	0	0	0	0	0	1.24	0	1.28	0	0	0	0	1.04	0	0.6	0.57	0	0	0.56	0				YG31B_YEAST	1.35e-17
TRINITY_DN112182_c0_g1_i1.p1	0	0	0	0	0	0	0	0	0	0	0	0	0	0	2.49	0.28	0	0	1.75	0	4.34
TRINITY_DN11219_c0_g1_i2.p1	104.49	88.91	89.27	74.31	101.15	102.59	87.32	105.76	92.55	81.02	95.47	91.13	87.56	95.12	91.27	108.36	85.33	104.6	93.84	141.47	160.46	AT5G12320.1	5.58e-64		YNW5_SCHPO	9.91e-19
TRINITY_DN1121_c0_g2_i1.p1	38.17	45.89	32.9	23.16	38.44	43.87	45.7	39.33	33.37	30.51	38.38	41.76	39.84	40.45	52.63	41.87	35.79	48.2	57.92	74.53	87.33	AT5G58030.1	7.06e-135		TPPC5_DICDI	2.82e-81
TRINITY_DN112206_c0_g1_i1.p1	0.75	0.22	0.43	0	0.97	0.26	0.26	0.46	1.09	1.61	1.61	0.46	1.31	1.31	0.25	0.5	1.23	0.68	2.04	0.97	0.66	AT1G09190.1	3.43e-84	Pentatricopeptide repeat-containing protein At1g09190 [Source:UniProtKB/Swiss-Prot;Acc:O80488]	PPR23_ARATH	3.38e-83
TRINITY_DN11220_c0_g1_i1.p2	0.57	5.35	3.92	2.77	0.56	1.86	1.84	3.23	3.16	1.32	1.97	1.99	3.14	2.57	2.24	5.36	4.5	3.09	5.18	2.21	0	AT4G23160.2	7.15e-33		POLR1_ARATH	1e-31
TRINITY_DN11220_c0_g1_i4.p1	0.59	1.33	0.25	1.39	1.71	2.16	0.31	1.36	0.64	0.7	0	1.33	0.93	1.29	0.59	2.67	2.9	1.33	1.6	0.28	0
TRINITY_DN112229_c0_g1_i1.p1	0	0	0	0	0	0	0	0	0	0	0	0	0	0	0.93	0	0	0	0	0	0
TRINITY_DN11222_c0_g1_i1.p1	5.66	5.49	5.82	3.17	6.17	6.04	5.12	8.21	8.52	7.09	7.07	8.54	7.85	7.51	9.89	13.45	12.44	10.03	14.83	9.04	7.54	AT3G46450.1	6.38e-129		CTG1_CAEEL	9.75e-10
TRINITY_DN11224_c0_g3_i2.p1	4.01	3.71	3.71	2.77	3.24	2.66	2.64	4.88	3.76	5.34	5.31	5.58	4.69	3.65	4.89	5.54	5.67	4.95	5.7	3.19	3.75	AT5G48120.2	0	MMS19 nucleotide excision repair protein homolog [Source:UniProtKB/Swiss-Prot;Acc:Q0WVF8]	MMS19_ARATH	0
TRINITY_DN11225_c0_g1_i1.p1	0.44	0	0.38	0	0	0	0	0	0	0	0	0	0	0	0	0	0	0	0	0	0	AT5G28530.1	1.86e-14	Putative protein FAR1-RELATED SEQUENCE 10 [Source:UniProtKB/Swiss-Prot;Acc:Q9LKR4]	FRS10_ARATH	1.83e-13
TRINITY_DN11226_c0_g1_i2.p1	2.42	2.89	2.4	0.9	1	2.11	2.27	3.8	4.11	2.62	2.86	4.69	2.99	3.26	7.9	5.03	6.54	2.99	8.78	12.88	7.48	AT1G19025.1	8.98e-170		DCR1B_CHICK	2.25e-27
TRINITY_DN112285_c0_g2_i1.p1	0	0	0.97	0	0	0	0	0	0	0	0	0	0	0	0	0	0	0	0	0	0				POL3_DROME	6.7e-10
TRINITY_DN11228_c0_g1_i10.p1	0	0	0	0	0	0	1.73	0	0	0	0	0	0	0.57	0	0	0	0	0	0	0	AT3G51520.1	3.8e-119	Diacylglycerol O-acyltransferase 2 [Source:UniProtKB/Swiss-Prot;Acc:Q9ASU1]	DAT2D_SOYBN	1.58e-128
TRINITY_DN11228_c0_g1_i4.p1	10.7	9.25	11.45	9.08	12.6	15.2	9.96	11.06	10.24	11.96	9.36	11.25	17.55	11.01	10.7	11.37	12.86	8.93	22.07	15.62	11.19	AT3G51520.1	7.99e-152	Diacylglycerol O-acyltransferase 2 [Source:UniProtKB/Swiss-Prot;Acc:Q9ASU1]	DAT2D_SOYBN	1.25e-162
TRINITY_DN11228_c0_g1_i7.p1	0.85	0	0	0	0	0.51	0	0.42	0.6	1.55	0.97	0	0.41	0.3	0	0.95	0.33	0.95	0.64	0.9	0	AT3G51520.1	1.64e-102	Diacylglycerol O-acyltransferase 2 [Source:UniProtKB/Swiss-Prot;Acc:Q9ASU1]	DAT2D_SOYBN	4.72e-108
TRINITY_DN11228_c0_g1_i8.p1	0	0	0	0	0.48	0	0	0	0.39	0	0.28	1.03	0	0	0.52	0	1.08	0.85	1.63	0.95	0	AT3G51520.1	2.6e-110	Diacylglycerol O-acyltransferase 2 [Source:UniProtKB/Swiss-Prot;Acc:Q9ASU1]	DAT2D_SOYBN	1.14e-119
TRINITY_DN11229_c0_g1_i4.p1	0.8	1.28	3.2	1.69	2.01	1.48	0.33	0.59	1.39	6.65	1.69	1.93	1.32	0.83	1.14	1.12	1.74	2.05	1.31	0.47	0.43	AT2G22420.1	6.12e-165	Peroxidase 17 [Source:UniProtKB/Swiss-Prot;Acc:Q9SJZ2]	PER17_ARATH	6.02e-164
TRINITY_DN1122_c0_g1_i10.p1	18.69	19.16	24.51	14.27	14.98	10.33	13.99	22.88	32.47	23.59	34	29.66	18.22	19.41	23.64	30.43	36.51	32.16	19.57	8.21	8.74	AT5G27330.1	1.44e-12
TRINITY_DN11230_c0_g1_i1.p1	0.34	1.67	1.18	1	0.16	0.53	0.17	0.63	0.92	0.83	0.72	0	0.53	0.44	9.46	7.29	11.22	3.72	8.8	4.94	4.39	AT3G06490.1	1.92e-79	Transcription factor MYB108 [Source:UniProtKB/Swiss-Prot;Acc:Q9LDE1]	MY108_ARATH	1.89e-78
TRINITY_DN11233_c1_g1_i1.p1	54.02	50.07	44.29	33.26	55.53	53.76	51.9	50	52.68	49.7	56.09	46.88	52.9	59.29	67.06	47.86	61.31	50.47	74.04	75.58	80.66	AT3G52220.1	2.95e-69		MMTA2_MOUSE	4.22e-26
TRINITY_DN11235_c0_g2_i2.p1	4.44	6.92	7.13	4.7	6.4	6.64	4.89	7.18	11.06	9.14	7.63	10.04	8.17	8.71	13.39	11.54	10.71	11.46	17.87	13.5	13.76	AT1G14740.1	0	Protein OBERON 3 [Source:UniProtKB/Swiss-Prot;Acc:Q94B71]	OBE3_ARATH	0
TRINITY_DN11237_c0_g2_i1.p1	5.53	9.98	7.77	3.06	6.17	5.65	6.09	6.65	9.02	7.24	5.16	7.79	7.4	10.38	13.09	14.36	8.62	7.53	15.98	12.69	15.11	AT1G36990.1	1.33e-08
TRINITY_DN11238_c0_g5_i4.p1	26.18	24.02	25.79	17.67	24.24	24.61	21.34	30.23	32.49	31.39	33.87	29.32	33.47	29.3	39.84	36.72	33.99	33.18	46.9	28.42	27.09	AT4G31480.4	0	Coatomer subunit beta-1 [Source:UniProtKB/Swiss-Prot;Acc:Q9SV21]	COPB1_ARATH	0
TRINITY_DN11238_c0_g6_i1.p1	13.77	16.3	12.08	8.3	16.68	17.81	17.73	20.96	17.68	16.14	20.71	14.25	18.39	15.08	20.46	15.27	18.32	18.95	25.45	13.36	13.39	AT4G31480.4	0	Coatomer subunit beta-1 [Source:UniProtKB/Swiss-Prot;Acc:Q9SV21]	COPB1_ARATH	0
TRINITY_DN11238_c1_g1_i1.p1	13.86	16.88	23.28	15.65	16.71	15.97	13.41	28.24	38.9	26.42	28.64	19.93	28.81	29.96	38.75	49.71	37.23	29.91	23.62	18.86	20.7	AT1G56560.1	3.36e-22	Alkaline/neutral invertase A, mitochondrial [Source:UniProtKB/Swiss-Prot;Acc:Q9FXA8]	INVA_ARATH	3.3e-21
TRINITY_DN11239_c0_g2_i1.p1	20.18	16.83	14.06	16.4	15.76	11.44	14.17	16	14.13	17.1	20.2	15.45	16.54	12.36	10.71	12.09	17.25	18.48	19.32	15.43	12.56	AT3G44160.1	3.96e-178		OEP39_ARATH	3.89e-177
TRINITY_DN11241_c0_g1_i1.p1	1333.53	1469.77	1494.15	1199.84	1315.21	1443.28	1479.37	1664.42	1779.55	1846.47	1701.16	1784.39	1665.64	1702.87	2752.84	2973.38	2903.61	2931.77	2552.32	2380.42	2389.59	AT2G13360.2	0	Serine--glyoxylate aminotransferase [Source:UniProtKB/Swiss-Prot;Acc:Q56YA5]	SGAT_ARATH	0
TRINITY_DN11241_c1_g1_i1.p1	4.63	4.27	3.61	2.64	3.36	3.9	3.73	4.41	4.05	3.8	3.6	3.06	5.4	4.98	5.23	6.48	7.33	4.63	7.6	4.96	4.19	AT3G06110.3	3.78e-25	Dual specificity protein phosphatase 1B [Source:UniProtKB/Swiss-Prot;Acc:Q9M8K7]	MKP1_ARATH	0
TRINITY_DN112438_c0_g1_i1.p1	0	0	0	0	0	0	0	0	0	0	0	0	0	0	0	0	0	0	0	0	1.55	AT4G19880.3	1.15e-39		GTO2_SCHPO	3.2e-51
TRINITY_DN112443_c0_g1_i1.p1	0	0	0	0	0	0	0	0	0	0	0	0	0	0	0	0	0	0	0.62	0.22	1.41	AT5G61830.1	6.06e-17		EUPG_PHOSX	1.6e-22
TRINITY_DN11244_c0_g1_i5.p1	62.98	70.49	65.46	56.75	58.97	57.14	64.69	66.07	64.71	81.87	85.06	69.4	82.48	68.43	49.49	50.93	53.74	58.16	49.13	41.95	34.39	AT2G41680.1	0	NADPH-dependent thioredoxin reductase 3 [Source:UniProtKB/Swiss-Prot;Acc:O22229]	NTRC_ORYSJ	0
TRINITY_DN112452_c0_g1_i1.p1	0	0.85	0.79	0.55	0.89	0	0.49	0	0.51	0	0.52	0	0.5	1.23	0.45	0	2.27	0.83	0.42	1.78	1.95	AT2G34320.1	2.96e-06
TRINITY_DN112452_c0_g2_i1.p1	0	0	0	0	0	0	0	0	0	0	0	0	0.39	0	0	0.37	0	0	0	0.71	0	AT3G25270.1	2.07e-07
TRINITY_DN112452_c0_g2_i1.p2	0	0	0	0.53	0.43	0	0	0.42	0	0.35	0	0	0	0	0	0	0	0	0	0	0	AT3G24255.4	3.17e-16		RNHX1_ARATH	1.67e-12
TRINITY_DN112455_c0_g1_i1.p1	0	0	0	0	0	0	0	0	0	0	0	0	0	0	0	0	0.27	0	0.5	0	1.45	AT4G34670.1	7.25e-116	40S ribosomal protein S3a-2 [Source:UniProtKB/Swiss-Prot;Acc:Q42262]	RS3A_PYRTR	9.2e-170
TRINITY_DN112457_c0_g1_i1.p1	0	0	0	0	0	0.18	0	0	0	0	0	0	0	0	0.35	0	0	0	0.16	0.17	0	AT2G43120.1	3.11e-98	Pirin-like protein 2 [Source:UniProtKB/Swiss-Prot;Acc:Q9ZW82]	PIRL_SOLLC	4.17e-111
TRINITY_DN112464_c0_g1_i4.p1	1.65	2.61	1.61	1.78	1.47	1.12	1.78	1.71	2.61	2.51	2.39	0.82	3.14	2.45	1.89	2.71	1.51	3.1	2.78	1.8	0.39	AT1G08730.2	0	Myosin-9 [Source:UniProtKB/Swiss-Prot;Acc:F4HXP9]	MYO9_ARATH	0
TRINITY_DN112466_c0_g1_i2.p1	0	0	0	0	0.09	0	0	0.09	0.3	0	0	0	0	0	2.27	0	0.09	0.17	1.52	0.36	0.42	AT3G61270.1	0		PGLT1_BOVIN	1.51e-21
TRINITY_DN11246_c0_g1_i3.p1	2.21	1.81	2.43	2.24	1.47	1.55	1.55	2.75	2.45	1.26	3.09	1.44	1.56	2.05	3.19	4.07	2.29	2.56	2.84	2.97	3.32	AT1G79740.4	0
TRINITY_DN11247_c0_g1_i2.p1	6.68	4.27	4.37	3.76	4.56	5.16	5.2	6.95	6.57	5.68	6.86	5.77	7.88	7.97	9.86	5.58	6.5	7.2	8.31	6.34	4.89	AT4G00150.1	1.62e-136	Scarecrow-like protein 6 [Source:UniProtKB/Swiss-Prot;Acc:O81316]	SCL6_ARATH	1.59e-135
TRINITY_DN11248_c0_g1_i1.p1	0	0.38	0.71	0.99	1.6	5.71	2.6	0.39	1.36	2.27	0.46	1.83	3.09	1.83	11.05	5.07	3.66	3.73	7.48	10.37	3.18	AT1G67520.6	7.33e-23		SLSG3_BRAOL	3.57e-22
TRINITY_DN1124_c1_g1_i5.p2	2.56	0	1.36	2.8	0	2.6	4.02	0	0	0.71	0.77	1.36	2.98	5.99	0	3.3	0.75	0	0	1.59	0	AT5G02270.1	1.78e-50	ABC transporter I family member 20 [Source:UniProtKB/Swiss-Prot;Acc:Q9LZ98]	AB20I_ARATH	1.75e-49
TRINITY_DN1124_c1_g1_i7.p1	65.88	57.03	36.57	26.06	19.18	40.42	61.82	70.9	43.76	34.57	40.34	31.22	49.88	60.61	54.24	29.68	21.37	27.5	17.61	43.16	48.83	AT5G02270.1	1.52e-178	ABC transporter I family member 20 [Source:UniProtKB/Swiss-Prot;Acc:Q9LZ98]	AB20I_ARATH	1.49e-177
TRINITY_DN11250_c0_g2_i2.p1	10.65	11.98	10.97	6.99	9.55	12.15	13.39	16.08	19.19	12.8	12.6	11.5	15.4	16.5	20.85	20.48	22.29	17.32	23.37	18.74	16.55	AT5G09860.1	0	THO complex subunit 1 [Source:UniProtKB/Swiss-Prot;Acc:Q93VM9]	THOC1_ARATH	0
TRINITY_DN11251_c0_g1_i1.p1	1.94	6.75	5.02	5.56	13.94	11.54	5.7	6.88	11.5	8.89	3.87	12.14	13.27	13.04	16.61	9.52	18.36	17.93	26.07	20.65	30.03	AT5G65650.1	8.23e-37
TRINITY_DN11253_c1_g1_i7.p1	1.08	0.63	0.35	0.83	2.98	4.41	1.16	7.24	4.39	3.07	0.99	2.78	1.96	3.9	4.12	0.75	2.94	1.63	8.56	1.04	0.98
TRINITY_DN11253_c1_g1_i7.p2	0.91	1.13	0.47	0.42	3.84	4.1	0.93	11.85	7.07	5.43	1.53	2.17	5.05	3.29	8.22	1.44	5.16	1.32	15.93	1.75	2.09	AT1G32010.1	1.19e-10
TRINITY_DN112542_c0_g1_i1.p2	0	0	0	0	0	0	0.37	0	0	0	0	0	0	0	0	0	0	0	0	0	0	AT5G13510.1	2.06e-97	50S ribosomal protein L10, chloroplastic [Source:UniProtKB/Swiss-Prot;Acc:Q9FY50]	RK10_TOBAC	1.46e-97
TRINITY_DN112545_c0_g1_i1.p1	0	0.49	0.24	0	0	0.28	0.56	0.25	0	0.65	0.29	0	0	0	1.36	0.82	1.07	0.49	1.48	1.05	0.48	AT4G37730.1	8.02e-22		BZIP2_ARATH	3.02e-15
TRINITY_DN11256_c0_g1_i1.p1	28.37	18.14	30.73	16.51	13.85	16.5	8.98	13.36	22.07	23.69	19.8	23.48	13.78	17.44	10.88	19.65	18.67	16.61	25.76	19.31	25.66	AT5G11340.1	4.75e-98		SAN_DROME	9.01e-55
TRINITY_DN112586_c0_g1_i1.p1	0	0	0	0	0	0	0	0	0	0	0	0	0	0	0	0	0	0	0	0	0
TRINITY_DN1125_c0_g1_i1.p1	24.29	22.62	19.62	19.39	20.99	14.83	18.89	18.31	19.33	21.04	18.02	21.99	13.68	19.23	18.94	18.05	16.28	22.04	16.14	18.62	16.48	AT2G18465.1	1.01e-29
TRINITY_DN1125_c0_g1_i2.p1	2.93	5.38	2.73	0.75	1.15	6.45	1.27	1.76	1.31	1.56	0.68	3.23	0.67	2.12	1.79	4.59	0.55	2.18	0.54	1.14	0
TRINITY_DN1125_c1_g1_i4.p1	15.22	12.1	8.73	7.24	11.25	12.23	12.54	15.75	13.48	11.6	10.1	12.75	15.34	15.46	23.71	17.67	18.49	15.21	26.51	14.75	12.46	AT1G48090.4	0		VP13C_MOUSE	7.85e-32
TRINITY_DN112623_c0_g1_i1.p1	0.37	0.21	0.84	0.42	0	0.12	0.49	0.22	0.26	0.2	0	0.34	0.12	0.1	0.49	0.36	0.48	0.44	0.22	0.12	0.11	AT4G10950.2	4.14e-169		GDL75_ARATH	5.92e-70
TRINITY_DN112643_c1_g1_i1.p1	0.22	0	0	0	0	0	0	0.2	0	0.18	0.23	0	0	0	0	0	0.22	0.4	0.4	0	0.19
TRINITY_DN112643_c1_g1_i1.p2	0	0	0	0	0.56	0	0	0	0	0	0	0	1.88	0	3.92	0	0	0.51	0.52	0	0
TRINITY_DN11264_c1_g1_i1.p1	1.24	0.22	0	0.59	0.24	0	0.77	0.23	0	0	0.27	0.45	0.52	0.22	0	0.75	0	0.45	0.45	0.48	0.22
TRINITY_DN112659_c0_g1_i3.p1	0.44	0	0.38	0	0	0	0.46	0	1.45	0	0	0	0	0.39	0	0	0	0.4	0	0	0
[truncated: 35,922 more rows]

## Sheet: Supplementary Table 3
Supplementary Table 3. Summary of contigs with hits in the FLOR-ID database.
Gene name	TAIR ID	NCBI ID	Transcript ID	Gene model	ORF type	Photoperiod	Vernalization	Aging	Hormones	Temp.	Sugar	Autonomous	Clock
ADG1	At5g48300	NM_124205.4	TRINITY_DN3256_c0_g2_i1.p1	AT5G48300.1	complete						○
AFR1	At1g75060	NM_001084354.1				○
AFR2	At1g19330	NM_001084092.2	TRINITY_DN4712_c0_g1_i1.p1	AT1G19330.2	complete	○
			TRINITY_DN34727_c1_g3_i4.p1	AT1G19330.2	complete
			TRINITY_DN61396_c0_g1_i1.p1	AT1G19330.1	complete
AGL6	At2g45650	NM_130127.2										○
AGL16	At3g57230	NM_001339847.1										○
AGL17	At2g22630	NM_001335805.1				○
AGL19	At4g22950	NM_001341568.1					○
AGL24	At4g24540	NM_118587.6					○
AHL22	At2g45430	NM_130105.4				○						○
AKIN10	At3g01090	NM_001125074.2	TRINITY_DN2704_c0_g1_i12.p1	AT3G01090.3	complete						○
			TRINITY_DN5406_c1_g1_i1.p1	AT3G01090.2	complete
			TRINITY_DN6736_c0_g1_i2.p1	AT3G01090.2	complete
			TRINITY_DN6736_c0_g1_i4.p1	AT3G01090.2	complete
			TRINITY_DN6973_c0_g1_i1.p1	AT3G01090.2	complete
			TRINITY_DN2704_c0_g1_i16.p1	AT3G01090.3	3' partial
			TRINITY_DN6973_c0_g1_i8.p1	AT3G01090.2	3' partial
AP1	At1g69120	NM_105581.3	TRINITY_DN6622_c0_g1_i4.p1	AT1G69120.2	complete	○	○	○		○	○
			TRINITY_DN12957_c0_g1_i1.p1	AT1G69120.1	complete
AP2	At4g36920	NM_001204009.1	TRINITY_DN103_c1_g1_i1.p1	AT4G36920.2	complete	○
			TRINITY_DN103_c1_g2_i3.p1	AT4G36920.2	complete
			TRINITY_DN23960_c0_g1_i1.p1	AT4G36920.2	complete
AP3	At3g54340	NM_115294.6	TRINITY_DN2004_c1_g3_i2.p1	AT3G54340.1	complete		○
			TRINITY_DN22191_c0_g1_i5.p1	AT3G54340.1	complete
			TRINITY_DN30900_c0_g1_i2.p1	AT3G54340.1	complete
ARP4	At1g18450	NM_101702.4	TRINITY_DN15238_c0_g1_i6.p1	AT1G18450.1	complete		○					○
ARP6	At3g33520	NM_114070.4	TRINITY_DN4767_c0_g1_i5.p1	AT3G33520.1	complete					○		○
AS1	At2g37630	NM_129319.4	TRINITY_DN14745_c0_g1_i1.p1	AT2G37630.1	complete	○			○
			TRINITY_DN31100_c0_g1_i1.p1	AT2G37630.1	complete
ASH2R	At1g51450	NM_104023.3	TRINITY_DN27283_c0_g1_i3.p1	AT1G51450.1	complete		○					○
ATC	At2g27550	NM_128315.4				○
ATJ3	At3g44110	NM_114279.4	TRINITY_DN527_c1_g3_i1.p1	AT3G44110.1	complete							○
			TRINITY_DN5862_c0_g1_i4.p1	AT3G44110.1	complete
			TRINITY_DN1076_c0_g1_i7.p1	AT3G44110.1	complete
			TRINITY_DN30714_c0_g3_i2.p1	AT3G44110.1	5' partial
			TRINITY_DN527_c1_g1_i3.p1	AT3G44110.2	3' partial
			TRINITY_DN14357_c0_g1_i12.p1	AT3G44110.1	3' partial
			TRINITY_DN14357_c1_g1_i1.p1	AT3G44110.1	internal
AtNDX	At4g03090	NM_116543.6	TRINITY_DN5409_c0_g3_i14.p1	AT4G03090.3	complete		○					○
At-STUbl4	At1g66650	NM_179522.2	TRINITY_DN20123_c0_g2_i5.p1	AT1G66650.1	complete	○
ATX1	At2g31650	NM_179839.3	TRINITY_DN7964_c0_g1_i3.p1	AT2G31650.1	complete	○	○					○
			TRINITY_DN37755_c0_g1_i2.p1	AT2G31650.1	complete
			TRINITY_DN7964_c0_g1_i2.p1	AT2G31650.1	5' partial
ATX2	At1g05830	NM_001083995.4				○	○					○
ATXR7	At5g42400	NM_001344444.1	TRINITY_DN2457_c0_g1_i10.p1	AT5G42400.6	complete		○					○
BAF60	At5g14170	NM_121421.4	TRINITY_DN2735_c0_g1_i1.p1	AT5G14170.1	5' partial							○
BBX19	At4g38960	NM_001342518.1	TRINITY_DN7233_c0_g1_i9.p1	AT4G38960.1	complete	○
BFT	At5g62040	NM_125597.2										○
BMI1A	At2g30580	NM_001336273.1					○
BMI1B	At1g06770	NM_100554.5	TRINITY_DN1884_c0_g1_i1.p1	AT1G06770.2	complete		○
			TRINITY_DN1884_c0_g1_i2.p1	AT1G06770.2	complete
BMI1C	At3g23060	NM_113206.5					○					○
BOA	At5g59570	NM_001345359.1											○
BRC1	At3g18550	NM_001338345.1				○
BRM	At2g46020	NM_001337167.1	TRINITY_DN6438_c1_g1_i1.p1	AT2G46020.4	complete							○
CAD2	At4g23100	NM_001203879.2	TRINITY_DN11789_c0_g1_i3.p1	AT4G23100.1	complete							○
CBP20	At5g44200	NM_001085236.2	TRINITY_DN16333_c0_g1_i3.p1	AT5G44200.1	complete		○					○
			TRINITY_DN16333_c0_g1_i5.p1	AT5G44200.1	complete
CBP80	At2g13540	NM_126934.4	TRINITY_DN10081_c0_g1_i1.p1	AT2G13540.1	complete		○					○
CCA1	At2g46830	NM_180129.4											○
CDF1	At5g62430	NM_125637.4	TRINITY_DN7342_c0_g1_i2.p1	AT5G62430.1	complete	○
CDF2	At5g39660	NM_001344299.1	TRINITY_DN4189_c1_g2_i3.p1	AT5G39660.3	complete	○
			TRINITY_DN10109_c0_g2_i1.p1	AT5G39660.3	5' partial
			TRINITY_DN4938_c1_g1_i1.p1	AT5G39660.3	internal
CDF3	At3g47500	NM_114618.4	TRINITY_DN4938_c0_g2_i1.p1	AT3G47500.1	complete	○
CDKC;2	At5g64960	NM_125895.5	TRINITY_DN1248_c1_g1_i2.p1	AT5G64960.1	complete		○					○
CHE	At5g08330	NM_120916.3											○
CIB1	At4g34530	NM_119618.3	TRINITY_DN573_c1_g1_i15.p1	AT4G34530.1	complete	○
			TRINITY_DN12869_c1_g1_i7.p1	AT4G34530.1	complete
CKB3	At3g60250	NM_115889.5											○
CKB4	At2g44680	NM_130032.3	TRINITY_DN32576_c0_g1_i2.p1	AT2G44680.3	complete								○
			TRINITY_DN32576_c0_g1_i4.p1	AT2G44680.1	complete
			TRINITY_DN29932_c1_g4_i4.p1	AT2G44680.3	5' partial
CLF	At2g23380	NM_127902.6	TRINITY_DN975_c0_g1_i2.p1	AT2G23380.1	complete	○	○					○
			TRINITY_DN975_c0_g1_i7.p1	AT2G23380.2	complete
			TRINITY_DN975_c0_g1_i19.p1	AT2G23380.2	complete
			TRINITY_DN975_c0_g1_i10.p2	AT2G23380.2	complete
			TRINITY_DN23808_c0_g1_i1.p1	AT2G23380.1	complete
			TRINITY_DN975_c0_g1_i12.p1	AT2G23380.2	3' partial
			TRINITY_DN30762_c0_g1_i4.p1	AT2G23380.1	3' partial
CO	At5g15840	NM_121589.2				○
COL5	At5g57660	NM_125149.3	TRINITY_DN10486_c0_g1_i1.p1	AT5G57660.1	complete	○
COL9	At3g07650	NM_001035582.1	TRINITY_DN6773_c0_g1_i2.p1	AT3G07650.3	complete	○
COP1	At2g32950	NM_128855.4	TRINITY_DN1977_c1_g1_i2.p1	AT2G32950.1	complete	○
			TRINITY_DN1977_c1_g1_i5.p1	AT2G32950.1	complete
CPK6	At2g17290	NM_001335545.1	TRINITY_DN1751_c0_g1_i8.p1	AT2G17290.2	complete	○
			TRINITY_DN1238_c1_g1_i2.p1	AT2G17290.2	3' partial
CPK33	At1g50700	NM_103952.4	TRINITY_DN12724_c0_g1_i1.p1	AT1G50700.1	complete	○
			TRINITY_DN12792_c0_g1_i1.p1	AT1G50700.1	3' partial
CRY1	At4g08920	NM_116961.5	TRINITY_DN3125_c0_g2_i1.p1	AT4G08920.1	complete	○
CRY2	At1g04400	NM_100320.4	TRINITY_DN9403_c0_g2_i2.p1	AT1G04400.1	complete	○
CSTF64	At1g71800	NM_105838.5	TRINITY_DN2539_c0_g1_i11.p1	AT1G71800.1	complete		○					○
CSTF77	At1g17760	NM_101639.3	TRINITY_DN75140_c0_g1_i3.p1	AT1G17760.1	5' partial		○					○
			TRINITY_DN75140_c0_g1_i4.p1	AT1G17760.1	internal
CUL3A	At1g26830	NM_102447.5	TRINITY_DN14216_c0_g1_i1.p1	AT1G26830.1	complete		○
CUL4	At5g46210	NM_123990.3	TRINITY_DN1616_c1_g1_i2.p1	AT5G46210.1	complete	○						○
			TRINITY_DN1616_c1_g1_i1.p1	AT5G46210.1	5' partial
DCL1	At1g01040	NM_099986.4	TRINITY_DN602_c0_g1_i1.p1	AT1G01040.1	complete							○
DCL3	At3g43920	NM_001161190.2	TRINITY_DN1528_c0_g1_i1.p1	AT3G43920.2	complete							○
			TRINITY_DN18823_c0_g1_i1.p1	AT3G43920.2	3' partial
DCL4	At5g20320	NM_122039.5:	TRINITY_DN193_c0_g1_i4.p1	AT5G20320.1	complete							○
			TRINITY_DN193_c0_g1_i15.p1	AT5G20320.1	complete
			TRINITY_DN13283_c0_g1_i2.p1	AT5G20320.1	3' partial
			TRINITY_DN13283_c0_g1_i4.p1	AT5G20320.1	3' partial
DET1	At4g10180	NM_117086.4	TRINITY_DN11031_c0_g1_i12.p1	AT4G10180.1	complete							○
DNF	At3g19140	NM_112801.1				○
EBS	At4g22140	NM_001341530.1	TRINITY_DN635_c0_g2_i4.p1	AT4G22140.2	complete	○
			TRINITY_DN635_c0_g2_i5.p1	AT4G22140.2	complete
			TRINITY_DN635_c0_g2_i12.p1	AT4G22140.2	complete
			TRINITY_DN5304_c0_g1_i2.p1	AT4G22140.2	complete
			TRINITY_DN11815_c0_g1_i1.p1	AT4G22140.2	complete
			TRINITY_DN15701_c0_g1_i4.p1	AT4G22140.2	complete
EFM	At2g03500	NM_126400.3	TRINITY_DN655_c0_g1_i1.p1	AT2G03500.1	complete					○
			TRINITY_DN655_c0_g1_i7.p1	AT2G03500.1	complete
			TRINITY_DN13085_c0_g2_i1.p1	AT2G03500.1	complete
EFS	At1g77300	NM_106379.9	TRINITY_DN5927_c0_g1_i3.p1	AT1G77300.2	complete		○					○
ELF3	At2g25930	NM_128153.3	TRINITY_DN18135_c0_g2_i1.p1	AT2G25930.1	complete					○			○
ELF4	At2g40080	NM_129566.2								○			○
ELF6	At5g04240	NM_120506.5	TRINITY_DN19059_c0_g1_i2.p1	AT5G04240.1	complete	○						○
			TRINITY_DN309_c0_g1_i2.p1	AT5G04240.1	3' partial
			TRINITY_DN146814_c0_g1_i1.p1	AT5G04240.1	3' partial
ELF7	At1g79730	NM_106622.5	TRINITY_DN1890_c0_g1_i1.p1	AT1G79730.1	complete		○					○
EMF1	At5g11530	NM_001343200.1					○					○
EMF2	At5g51230	NM_180837.3	TRINITY_DN5315_c0_g1_i4.p1	AT5G51230.1	complete		○					○
			TRINITY_DN5315_c0_g1_i16.p1	AT5G51230.1	complete
			TRINITY_DN5315_c0_g1_i18.p1	AT5G51230.1	complete
			TRINITY_DN7530_c0_g1_i1.p1	AT5G51230.1	complete
			TRINITY_DN5315_c0_g1_i11.p1	AT5G51230.1	3' partial
ESD4	At4g15880	NM_117680.4	TRINITY_DN11495_c0_g1_i6.p1	At4g15880.1	complete							○
			TRINITY_DN29868_c0_g1_i1.p1	AT4G15880.1	complete
			TRINITY_DN29868_c0_g1_i4.p1	AT4G15880.1	complete
ESD7	At1g08260	NM_100699.6	TRINITY_DN3766_c1_g4_i1.p1	AT1G08260.2	complete							○
			TRINITY_DN36948_c0_g1_i3.p1	AT1G08260.1	complete
			TRINITY_DN752_c0_g2_i6.p1	AT1G08260.2	5' partial
			TRINITY_DN11549_c0_g1_i4.p1	AT1G08260.2	5' partial
			TRINITY_DN11549_c0_g1_i1.p1	AT1G08260.2	internal
FBH1	At1g35460	NM_103240.3	TRINITY_DN1824_c0_g1_i2.p1	AT1G35460.1	complete	○
FBH2	At4g09180	NM_116987.5				○
FBH3	At1g51140	NM_103993.3				○
FBH4	At2g42280	NM_129790.5	TRINITY_DN2666_c0_g1_i1.p1	AT2G42280.1	complete	○
			TRINITY_DN11129_c0_g1_i10.p1	AT2G42280.1	complete
			TRINITY_DN11594_c0_g1_i3.p1	AT2G42280.1	complete
FCA	At4g16280	NM_001341092.1	TRINITY_DN14100_c0_g1_i2.p1	AT4G16280.3	complete		○	○		○		○
			TRINITY_DN23532_c0_g1_i1.p1	AT4G16280.3	complete
FD	At4g35900	NM_119756.5	TRINITY_DN15832_c1_g2_i6.p1	AT4G35900.1	complete	○		○	○	○	○
FDP	At2g17770	NM_001202616.1				○		○	○	○	○
FE	At1g79430	NM_179574.3	TRINITY_DN3384_c1_g1_i1.p1	AT1G79430.2	5' partial	○
FES1	At2g33835	NM_179890.4	TRINITY_DN4162_c0_g1_i3.p1	AT2G33835.1	complete		○
			TRINITY_DN7429_c1_g2_i1.p1	AT2G33835.1	complete
EFO2	At5g23730	NM_122278.4	TRINITY_DN42489_c0_g3_i3.p1	AT5G23730.1	complete	○
FIE1	At3g20740	NM_112965.1	TRINITY_DN14870_c0_g2_i1.p1	AT3G20740.1	complete		○					○
FIO1	At2g21070	NM_001036305.1	TRINITY_DN7900_c0_g1_i5.p1	AT2G21070.3	complete								○
FIS2	At2g35670	NM_129122.3					○
FKF1	At1g68050	NM_105475.4				○
FLC	At5g10140	NM_121052.3				○	○
FLD	At3g10390	NM_001337874.1	TRINITY_DN765_c0_g1_i1.p1	AT3G10390.3	complete		○					○
FLK	At3g04610	NM_001337535.1	TRINITY_DN4428_c0_g1_i1.p1	AT3G04610.4	complete							○
			TRINITY_DN25841_c0_g3_i2.p1	AT3G04610.4	complete
			TRINITY_DN25841_c0_g2_i1.p1	AT3G04610.4	3' partial
FLL4	At5g61920	NM_001126002.2	TRINITY_DN290_c1_g1_i1.p1	AT5G61920.3	complete		○
			TRINITY_DN290_c1_g1_i4.p1	AT5G61920.3	complete
			TRINITY_DN9605_c1_g1_i2.p1	AT5G61920.4	internal
FLX	At2g30120	NM_001161069.1					○
FPA	At2g43410	NM_001084577.2	TRINITY_DN2173_c1_g1_i17.p1	AT2G43410.2	complete		○					○
FPF1	At5g24860	NM_122395.5							○
FRI	At4g00650	NM_116290.4	TRINITY_DN18588_c0_g1_i3.p1	AT4G00650.1	complete		○
FRL1	At5g16320	NM_121637.4	TRINITY_DN28210_c0_g1_i1.p1	AT5G16320.1	complete		○
FRL2	At1g31814	NM_102917.4					○
FT	At1g65480	NM_105222.3	TRINITY_DN2269_c0_g4_i1.p1	AT1G65480.2	complete	○	○	○	○	○	○
			TRINITY_DN2269_c0_g4_i2.p1	AT1G65480.2	complete
FTIP	At5g06850	NM_120768.3	TRINITY_DN17176_c0_g3_i1.p1	AT5G06850.1	complete	○
			TRINITY_DN128204_c0_g1_i1.p1	AT5G06850.1	internal
FUL	At5g60910	NM_125484.4				○	○	○		○	○
FVE	At2g19520	NM_127510.5	TRINITY_DN952_c0_g1_i4.p1	AT2G19520.1	complete		○			○		○
			TRINITY_DN8231_c0_g1_i1.p1	AT2G19520.1	complete
FWA	At4g25530	NM_118685.3										○
FY	At5g13480	NM_121351.5	TRINITY_DN6981_c0_g1_i1.p1	AT5G13480.4	complete		○					○
GA2ox1	At1g78440	NM_106491.2				○			○
GA2ox2	At1g30040	NM_102743.3	TRINITY_DN11516_c0_g1_i3.p1	AT1G30040.1	complete	○			○
			TRINITY_DN11516_c0_g3_i1.p1	AT1G30040.1	complete
GA2ox3	At2g34555	NM_129007.2				○			○
GA2ox4	At1g47990	NM_103695.2				○			○
GA2ox6	At1g02400	NM_100121.5	TRINITY_DN55163_c0_g1_i1.p1	AT1G02400.2	3' partial	○			○
GA2ox7	At1g50960	NM_103976.2				○			○
GA2ox8	At4g21200	NM_118239.3	TRINITY_DN122708_c0_g1_i1.p1	AT4G21200.1	complete	○			○
			TRINITY_DN10492_c2_g1_i1.p1	AT4G21200.1	5' partial
GA20ox1	At4g25420	NM_118674.5	TRINITY_DN6657_c0_g3_i1.p1	AT4G25420.1	complete	○			○
			TRINITY_DN72434_c0_g2_i1.p1	AT4G25420.1	complete
			TRINITY_DN72434_c0_g2_i12.p1	AT4G25420.2	3' partial
GA20ox2	At5g51810	NM_124560.4	TRINITY_DN72434_c0_g3_i2.p1	AT5G51810.1	complete	○			○
GA20ox3	At5g07200	NM_120802.2				○			○
GA20ox4	At1g60980	NM_104778.1				○			○
GA20ox5	At1g44090	NM_103535.2				○			○
GA3ox1	At1g15550	NM_101424.3	TRINITY_DN15033_c0_g2_i1.p1	AT1G15550.1	complete	○			○
GA3ox2	At1g80340	NM_106683.2				○			○
GA3ox3	At4g21690	NM_118289.1				○			○
GA3ox4	At1g80330	NM_106682.1				○			○
GA1	At4g02780	NM_116512.2	TRINITY_DN135493_c0_g1_i1.p1	AT4G02780.1	5' partial				○
			TRINITY_DN174103_c0_g1_i1.p1	AT4G02780.1	internal
GA2	At1g79460	NM_106594.4	TRINITY_DN2754_c0_g3_i7.p1	AT1G79460.1	complete				○
			TRINITY_DN44563_c0_g1_i1.p1	AT1G79460.1	complete
			TRINITY_DN47394_c1_g1_i1.p1	AT1G79460.1	internal
GAI	At1g14920	NM_101361.3	TRINITY_DN522_c0_g1_i1.p1	AT1G14920.1	complete	○		○	○
			TRINITY_DN26029_c0_g1_i1.p1	AT1G14920.1	complete
			TRINITY_DN51027_c0_g3_i1.p1	AT1G14920.1	complete
			TRINITY_DN11575_c0_g3_i1.p1	AT1G14920.1	5' partial
			TRINITY_DN181266_c0_g1_i1.p1	AT1G14920.1	5' partial
GASA5	At3g02885	NM_111158.4							○
GI	At1g22770	NM_102124.3	TRINITY_DN995_c0_g5_i1.p1	AT1G22770.1	complete	○		○			○		○
			TRINITY_DN1526_c0_g1_i12.p1	AT1G22770.1	complete
GID1A	At3g05120	NM_111384.4				○		○	○
GID1B	At3g63010	NM_116166.5	TRINITY_DN17911_c0_g1_i2.p1	AT3G63010.1	complete	○		○	○
			TRINITY_DN29861_c0_g2_i1.p1	AT3G63010.1	complete
GID1C	At5g27320	NM_122614.4				○		○	○
GIS5	At5g63960	NM_125792.2	TRINITY_DN12482_c0_g1_i1.p1	AT5G63960.1	complete							○
			TRINITY_DN2959_c2_g2_i1.p1	AT5G63960.1	5' partial
			TRINITY_DN2959_c2_g2_i7.p1	AT5G63960.1	5' partial
GLK1	At2g20570	NM_127617.3	TRINITY_DN2234_c0_g1_i10.p1	AT2G20570.3	complete							○
			TRINITY_DN6572_c1_g1_i1.p1	AT2G20570.1	5' partial
			TRINITY_DN9737_c0_g2_i2.p1	AT2G20570.1	3' partial
			TRINITY_DN2234_c0_g1_i13.p1	AT2G20570.2	internal
			TRINITY_DN60800_c0_g2_i11.p1	AT2G20570.1	internal
GLK2	At5g44190	NM_123786.4	TRINITY_DN6572_c1_g1_i7.p1	AT5G44190.1	5' partial							○
GRF1	At4g09000	NM_116969.3				○		○	○	○	○
GRF2	At1g78300	NM_106479.3	TRINITY_DN258_c2_g1_i1.p1	AT1G78300.1	complete	○		○	○	○	○
			TRINITY_DN258_c0_g2_i3.p1	AT1G78300.1	complete
			TRINITY_DN10193_c0_g2_i1.p1	AT1G78300.1	complete
			TRINITY_DN4109_c0_g2_i1.p1	AT1G78300.1	3' partial
			TRINITY_DN4727_c0_g1_i1.p1	AT1G78300.1	3' partial
GRF3	At5g38480	NM_123209.4	TRINITY_DN4109_c0_g4_i3.p1	AT5G38480.1	complete	○		○	○	○	○
GRF4	At1g35160	NM_103213.3	TRINITY_DN632_c1_g2_i1.p1	AT1G35160.1	3' partial	○		○	○	○	○
GRF5	At5g16050	NM_001343435.1				○		○	○	○	○
GRF6	At5g10450	NM_121083.4				○		○	○	○	○
GRF7	At3g02520	NM_001337415.1				○		○	○	○	○
GRF8	At5g65430	NM_180943.2	TRINITY_DN258_c0_g2_i1.p1	AT5G65430.1	complete	○		○	○	○	○
			TRINITY_DN182187_c0_g1_i1.p1	AT5G65430.2	complete
GRF9	At2g42590	NM_129820.3				○		○	○	○	○
GRF10	At1g22300	NM_102081.4:				○		○	○	○	○
GRF11	At1g34760	NM_001084180.2	TRINITY_DN11299_c0_g1_i1.p1	AT1G34760.2	complete	○		○	○	○	○
GRF12	At1g26480	NM_102411.3	TRINITY_DN22640_c0_g1_i2.p1	AT1G26480.1	3' partial	○		○	○	○	○
GRF13	At1g78220	NM_106472.1				○		○	○	○	○
GRP2	At4g38680	NM_120029.3										○
GRP7	At2g21660	NM_127738.5	TRINITY_DN481_c0_g1_i14.p1	AT2G21660.2	complete							○
			TRINITY_DN1562_c0_g1_i9.p1	AT2G21660.2	complete
			TRINITY_DN7694_c0_g1_i5.p1	AT2G21660.2	complete
HAM1	At5g64610	NM_125857.3	TRINITY_DN61357_c0_g1_i4.p1	AT5G64610.1	complete							○
HDA5	At5g61060	NM_125499.5	TRINITY_DN39806_c0_g3_i2.p1	AT5G61060.1	complete		○					○
HDA6	At5g63110	NM_125705.4	TRINITY_DN25850_c0_g3_i1.p1	AT5G63110.1	complete		○					○
			TRINITY_DN50808_c0_g1_i1.p1	AT5G63110.1	complete
HDA9	At3g44680	NM_114336.4	TRINITY_DN1304_c0_g1_i3.p1	AT3G44680.1	complete							○
HLP1	At5g40490	NM_001344334.1					○					○
HOS1	At2g39810	NM_129540.5	TRINITY_DN4577_c0_g1_i1.p1	AT2G39810.1	complete	○
			TRINITY_DN4577_c0_g1_i5.p1	AT2G39810.1	complete
HTA8	At2g38810	NM_001336738.1										○
HTA9	At1g52740	NM_104152.4										○
HTA11	At3g54560	NM_001339683.1	TRINITY_DN3783_c1_g1_i2.p1	AT3G54560.1	5' partial							○
HUA2	At5g23510	NM_001125794.3										○
HUB1	At2g44950	NM_130060.4	TRINITY_DN826_c0_g1_i2.p1	AT2G44950.2	complete		○					○
			TRINITY_DN826_c0_g1_i2.p2	AT2G44950.1	complete
HUB2	At1g55250	NM_104398.4	TRINITY_DN16720_c0_g1_i1.p1	AT1G55250.5	complete		○					○
HULK2	At2g48160	NM_180154.7	TRINITY_DN7203_c1_g1_i1.p1	AT2G48160.1	3' partial							○
HULK3	At3g63070	NM_116172.3	TRINITY_DN7203_c1_g1_i11.p1	AT3G63070.1	complete							○
			TRINITY_DN7203_c1_g1_i2.p1	AT3G63070.1	complete
HXK1	At4g29130	NM_119057.4	TRINITY_DN4475_c4_g2_i1.p1	AT4G29130.1	complete			○			○
			TRINITY_DN7112_c0_g1_i4.p1	AT4G29130.1	complete
ICE1	At3g26744	NM_001035697.2	TRINITY_DN14664_c0_g1_i4.p1	AT3G26744.1	complete		○
			TRINITY_DN14664_c0_g2_i4.p1	AT3G26744.1	5' partial
IDD8	At5g44160	NM_123783.4									○
INO80	At3g57300	NM_001339850.1	TRINITY_DN1157_c0_g1_i7.p1	AT3G57300.4	complete							○
			TRINITY_DN1157_c0_g1_i7.p2	AT3G57300.4	complete
JMJ14	At4g20400	NM_118159.3	TRINITY_DN73258_c0_g1_i1.p1	AT4G20400.1	internal	○						○
JMJ15	At2g34880	NM_129041.1										○
JMJ30	At3g20810	NM_180286.1	TRINITY_DN10105_c0_g1_i5.p1	AT3G20810.5	complete	○				○		○
			TRINITY_DN10105_c0_g1_i7.p1	AT3G20810.2	complete
			TRINITY_DN19331_c0_g1_i2.p1	AT3G20810.4	internal
			TRINITY_DN20284_c1_g1_i2.p1	AT3G20810.5	internal
JMJ32	At3g45880	NM_001339230.1	TRINITY_DN8625_c1_g1_i5.p1	AT3G45880.2	5' partial							○
LATE	At5g48890	NM_001344809.1				○
LD	At4g02560	NM_001203731.2	TRINITY_DN1483_c0_g1_i2.p1	AT4G02560.2	complete							○
LDL1	At1g62830	NM_104961.4	TRINITY_DN48216_c0_g1_i1.p1	AT1G62830.1	5' partial	○						○
LDL2	At3g13682	NM_112218.2	TRINITY_DN14044_c0_g2_i10.p1	AT3G13682.1	complete	○						○
LFY	At5g61850	NM_125579.1				○	○	○	○	○	○
LHP1	At5g17690	NM_121775.3	TRINITY_DN1916_c0_g1_i12.p1	AT5G17690.1	complete	○	○					○
			TRINITY_DN28770_c0_g1_i4.p1	AT5G17690.2	5' partial
			TRINITY_DN1916_c0_g1_i1.p1	AT5G17690.2	3' partial
LHY	At1g01060	NM_001035847.1	TRINITY_DN4315_c0_g1_i13.p1	AT1G01060.7	complete								○
LIF2	At4g00830	NM_001036489.3	TRINITY_DN317_c0_g1_i11.p1	AT4G00830.6	complete		○					○
			TRINITY_DN3127_c2_g1_i2.p1	AT4G00830.6	complete
LKP2	At2g18915	NM_179652.2				○
LNK1	At5g64170	NM_001085324.2	TRINITY_DN1097_c0_g1_i1.p1	AT5G64170.3	complete								○
			TRINITY_DN1268_c0_g1_i10.p1	AT5G64170.1	complete
LNK2	At3g54500	NM_001203160.1	TRINITY_DN10796_c0_g1_i12.p1	AT3G54500.2	complete								○
			TRINITY_DN10796_c0_g1_i4.p1	AT3G54500.8	complete
			TRINITY_DN10796_c0_g1_i16.p1	AT3G54500.5	3' partial
			TRINITY_DN10796_c0_g1_i29.p1	AT3G54500.5	3' partial
LRB1	At2g46260	NM_130189.3	TRINITY_DN2071_c0_g2_i14.p1	AT2G46260.1	5' partial		○
LRB2	At3g61600	NM_116025.4	TRINITY_DN2065_c0_g1_i16.p1	AT3G61600.1	complete		○
			TRINITY_DN2065_c0_g1_i13.p1	AT3G61600.1	3' partial
			TRINITY_DN3155_c0_g4_i1.p1	AT3G61600.1	3' partial
LUX	At3g46640	NM_001035746.2	TRINITY_DN6022_c0_g1_i1.p1	AT3G46640.1	complete					○			○
LWD1	At1g12910	NM_101162.3	TRINITY_DN34328_c0_g2_i1.p1	AT1G12910.1	complete								○
LWD2	At3g26640	NM_113575.4											○
MAF1	At1g77080	NM_106358.4	TRINITY_DN9926_c0_g2_i3.p1	AT1G77080.4	complete		○			○
MAF2	At5g65050	NM_001126026.2					○			○
MAF3	At5g65060	NM_125905.4					○
MAF4	At5g65070	NM_001126027.1					○
MAF5	At5g65080	NM_001085330.2					○
MBD9	At3g01460	NM_111012.4	TRINITY_DN37030_c0_g2_i1.p1	AT3G01460.1	complete							○
MEA	At1g02580	NM_100139.4					○
MED12	At4g00450	NM_001340249.1	TRINITY_DN2966_c0_g1_i3.p1	AT4G00450.1	complete							○
			TRINITY_DN2966_c0_g1_i1.p1	AT4G00450.1	5' partial
MED13	At1g55325	NM_179478.2	TRINITY_DN7391_c0_g1_i2.p1	AT1G55325.2	complete							○
MED16	At4g04920	NM_116730.5	TRINITY_DN3860_c0_g2_i4.p1	AT4G04920.3	complete							○
MED18	At2g22370	NM_127802.4	TRINITY_DN14153_c0_g1_i1.p1	AT2G22370.1	5' partial							○
			TRINITY_DN14153_c0_g1_i3.p1	AT2G22370.1	5' partial
MIR156A	At2g25095	NR_140670.1						○	○		○
MIR156B	At4g30972	NR_142377.1						○	○		○
MIR156C	At4g31877	NR_142387.1						○	○		○
MIR156D	At5g10945	NR_143255.1						○	○		○
MIR156E	At5g11977	NR_143261.1						○	○		○
MIR156F	At5g26147	NR_143299.1						○	○		○
MIR156G	At2g19425	NR_140637.1						○	○		○
MIR156H	At5g55835	NR_143354.1						○	○		○
MIR172A	At2g28056	NR_140676.1				○		○	○	○	○
MIR172B	At5g04275	NR_142746.1				○		○	○	○	○
MIR172C	At3g11435	NR_141584.1				○		○	○	○	○
MOS1	At4g24680	NM_001341692.1	TRINITY_DN1856_c0_g1_i2.p1	AT4G24680.5	complete							○
MRG1	At4g37280	NM_119891.4	TRINITY_DN19961_c0_g1_i7.p1	AT4G37280.1	5' partial	○						○
			TRINITY_DN1025_c2_g1_i1.p1	AT4G37280.1	internal
			TRINITY_DN24607_c0_g4_i1.p1	AT4G37280.1	internal
MRG2	At1g02740	NM_100154.4				○						○
MSI1	At5g58230	NM_125208.3	TRINITY_DN1031_c0_g1_i1.p1	AT5G58230.1	complete	○	○					○
			TRINITY_DN1031_c0_g2_i2.p1	AT5G58230.1	3' partial
			TRINITY_DN1031_c0_g5_i1.p1	AT5G58230.1	5' partial
MYB30	At3g28910	NM_113812.5										○
MYR1	At5g18240	NM_121829.2				○
MYR2	At3g04030	NM_001125095.2	TRINITY_DN4995_c0_g2_i2.p1	AT3G04030.3	complete	○
			TRINITY_DN4995_c0_g2_i7.p1	AT3G04030.3	complete
			TRINITY_DN24090_c0_g2_i3.p1	AT3G04030.3	5' partial
			TRINITY_DN24090_c0_g1_i2.p1	AT3G04030.5	internal
NF-YA1	At5g12840	NM_001343248.1	TRINITY_DN6040_c0_g1_i6.p1	AT5G12840.2	complete	○			○
			TRINITY_DN26497_c0_g1_i3.p1	AT5G12840.1	complete
			TRINITY_DN26497_c0_g1_i1.p1	AT5G12840.2	5' partial
NF-YA4	At2g34720	NM_179904.5	TRINITY_DN2285_c0_g1_i13.p1	AT2G34720.1	complete	○			○
NF-YB1	At2g38880	NM_001036434.2				○			○
NF-YB2	At5g47640	NM_124138.2				○			○
NF-YB3	At4g14540	NM_117534.3	TRINITY_DN26753_c0_g2_i1.p1	AT4G14540.1	complete	○			○
			TRINITY_DN1223_c2_g2_i1.p1	AT4G14540.1	5' partial
			TRINITY_DN26753_c0_g1_i1.p1	AT4G14540.1	5' partial
NF-YC3	At1g54830	NM_104356.3				○			○
NF-YC4	At5g63470	NM_001037053.2	TRINITY_DN8572_c0_g1_i1.p1	AT5G63470.1	complete	○			○
NF-YC9	At1g08970	NM_100768.4	TRINITY_DN4388_c0_g1_i3.p1	AT1G08970.3	complete	○			○
			TRINITY_DN52350_c0_g1_i1.p1	AT1G08970.3	complete
OTS1	At1g60220	NM_104712.5	TRINITY_DN26_c0_g1_i4.p1	AT1G60220.1	3' partial							○
			TRINITY_DN695_c1_g2_i2.p1	AT1G60220.1	internal
OTS2	At1g10570	NM_100932.4	TRINITY_DN695_c0_g1_i2.p1	AT1G10570.1	complete							○
			TRINITY_DN695_c1_g3_i1.p1	AT1G10570.3	5' partial
PFT1	At1g25540	NM_102365.5	TRINITY_DN1904_c1_g1_i10.p1	AT1G25540.1	complete	○
			TRINITY_DN1904_c1_g1_i11.p2	AT1G25540.2	3' partial
PGI1	At4g24620	NM_118595.5	TRINITY_DN18418_c0_g1_i2.p1	AT4G24620.1	complete						○
			TRINITY_DN2385_c0_g1_i1.p1	AT4G24620.2	3' partial
PGM1	At5g51820	NM_124561.3	TRINITY_DN5676_c0_g1_i1.p1	AT5G51820.1	complete						○
PHL	At1g72390	NM_001334526.1	TRINITY_DN90_c0_g2_i1.p1	AT1G72390.1	complete	○
PHP	At3g22590	NM_113158.3	TRINITY_DN6236_c0_g1_i1.p1	AT3G22590.1	complete		○
PIE1	At3g12810	NM_112117.5	TRINITY_DN12889_c0_g1_i3.p1	AT3G12810.1	5' partial		○					○
PIF4	At2g43010	NM_129862.3	TRINITY_DN23585_c0_g1_i11.p1	AT2G43010.2	complete				○	○			○
PIF5	At3g59060	NM_001035812.2								○
PHYA	At1g09570	NM_001331841.1	TRINITY_DN5411_c0_g2_i1.p1	AT1G09570.3	complete	○
PHYB	At2g18790	NM_127435.4	TRINITY_DN12995_c0_g1_i6.p1	AT2G18790.1	complete	○
			TRINITY_DN12995_c0_g1_i8.p1	AT2G18790.1	complete
PHYC	At5g35840	NM_122975.3				○
PHYD	At4g16250	NM_117721.2				○
PHYE	At4g18130	NM_117923.8				○
PRMT10	At1g04870	NM_100365.4	TRINITY_DN1153_c0_g2_i1.p1	AT1G04870.2	complete							○
			TRINITY_DN1153_c0_g2_i10.p1	AT1G04870.2	complete
			TRINITY_DN9157_c0_g1_i6.p1	AT1G04870.2	internal
PRMT4A	At5g49020	NM_124279.5	TRINITY_DN8345_c0_g1_i1.p1	AT5G49020.1	complete							○
PRP8	At1g80070	NM_106656.4	TRINITY_DN69290_c0_g2_i1.p1	AT1G80070.1	complete							○
PRR3	At5g60100	NM_001203645.2	TRINITY_DN61991_c0_g1_i3.p1	AT5G60100.7	3' partial								○
PRR5	At5g24470	NM_122355.4	TRINITY_DN5609_c0_g2_i1.p1	AT5G24470.1	complete								○
PRR7	At5g02810	NM_120359.3	TRINITY_DN7169_c1_g1_i1.p1	AT5G02810.1	complete								○
			TRINITY_DN7850_c0_g1_i1.p1	AT5G02810.2	5' partial
			TRINITY_DN7169_c1_g2_i2.p1	AT5G02810.2	3' partial
PRR9	At2g46790	NM_130245.5											○
PUB12	At2g28830	NM_001336190.1	TRINITY_DN122691_c0_g1_i1.p1	AT2G28830.1	5' partial							○
PUB13	At3g46510	NM_114518.4	TRINITY_DN3003_c1_g1_i2.p1	AT3G46510.1	complete							○
			TRINITY_DN3003_c1_g2_i1.p1	AT3G46510.1	complete
			TRINITY_DN11189_c0_g2_i4.p1	AT3G46510.1	complete
RCD1	At1g32230	NM_102956.3	TRINITY_DN454_c1_g1_i8.p1	AT1G32230.1	complete							○
			TRINITY_DN3815_c0_g1_i10.p1	AT1G32230.1	complete
			TRINITY_DN7238_c0_g1_i3.p1	AT1G32230.3	complete
			TRINITY_DN454_c0_g1_i1.p1	AT1G32230.3	5' partial
			TRINITY_DN113456_c0_g1_i1.p1	AT1G32230.3	internal
RFI2	At2g47700	NM_180147.3	TRINITY_DN1006_c0_g2_i2.p1	AT2G47700.2	complete	○
REF6	At3g48430	NM_148863.4	TRINITY_DN23283_c0_g1_i1.p1	AT3G48430.1	complete	○						○
RGA1	At2g01570	NM_126218.3	TRINITY_DN522_c0_g2_i1.p1	AT2G01570.1	complete	○		○	○
			TRINITY_DN75682_c0_g1_i1.p1	AT2G01570.1	3' partial
			TRINITY_DN13977_c3_g1_i1.p1	AT2G01570.1	internal
			TRINITY_DN59320_c0_g1_i1.p1	AT2G01570.1	internal
RGL1	At1g66350	NM_105306.4	TRINITY_DN56580_c0_g1_i1.p1	AT1G66350.1	complete	○		○	○
			TRINITY_DN87272_c0_g1_i1.p1	AT1G66350.1	complete
			TRINITY_DN26029_c0_g2_i1.p1	AT1G66350.1	3' partial
RGL2	At3g03450	NM_111216.3	TRINITY_DN23507_c0_g3_i2.p1	AT3G03450.1	complete	○		○	○
			TRINITY_DN148761_c0_g1_i1.p1	AT3G03450.1	internal
RGL3	At5g17490	NM_121755.3	TRINITY_DN4758_c0_g2_i1.p1	AT5G17490.1	complete	○		○	○
			TRINITY_DN23507_c0_g3_i1.p1	AT5G17490.1	complete
[truncated: 137 more rows]

## Sheet: Supplementary Table 4
Supplementary Table 4. Summary of the BBX and MADS-box genes obtained in this study.
[truncated: 38 more rows]

[truncated: 3 more sheets: Supplementary Table 5, Supplementary Table 6, Supplementary Table 7]
